# Supplementary material
Source: PubMed Central journal article supplement (PMC5868213)
Supplement: ddw092_supp.pdf [file ddw092_supp.pdf]

**Supplementary Information**  
Table of Contents

|                         | <b>Title</b>                                                                                   | <b>Page</b> |
|-------------------------|------------------------------------------------------------------------------------------------|-------------|
| Supplementary Figure 1: | QQ plot of association results from meta-analysis of imputed and genotyped SNPs and risk of EC | 2           |
| Supplementary Table 1:  | Meta-analysis results for SNPs reaching genome-wide significance                               | 3           |
| Supplementary Table 2a: | Results from eQTL analysis of 6p22 region: endometrial tumour tissue                           | 9           |
| Supplementary Table 2b: | Results from eQTL analysis of 6p22 region: normal endometrial tissue                           | 56          |
| Supplementary Table 3:  | Studies of 6p22.3 genes and cancer using SNP or expression data                                | 103         |
| Supplementary Table 4:  | Description of studies included in meta-analysis                                               | 104         |

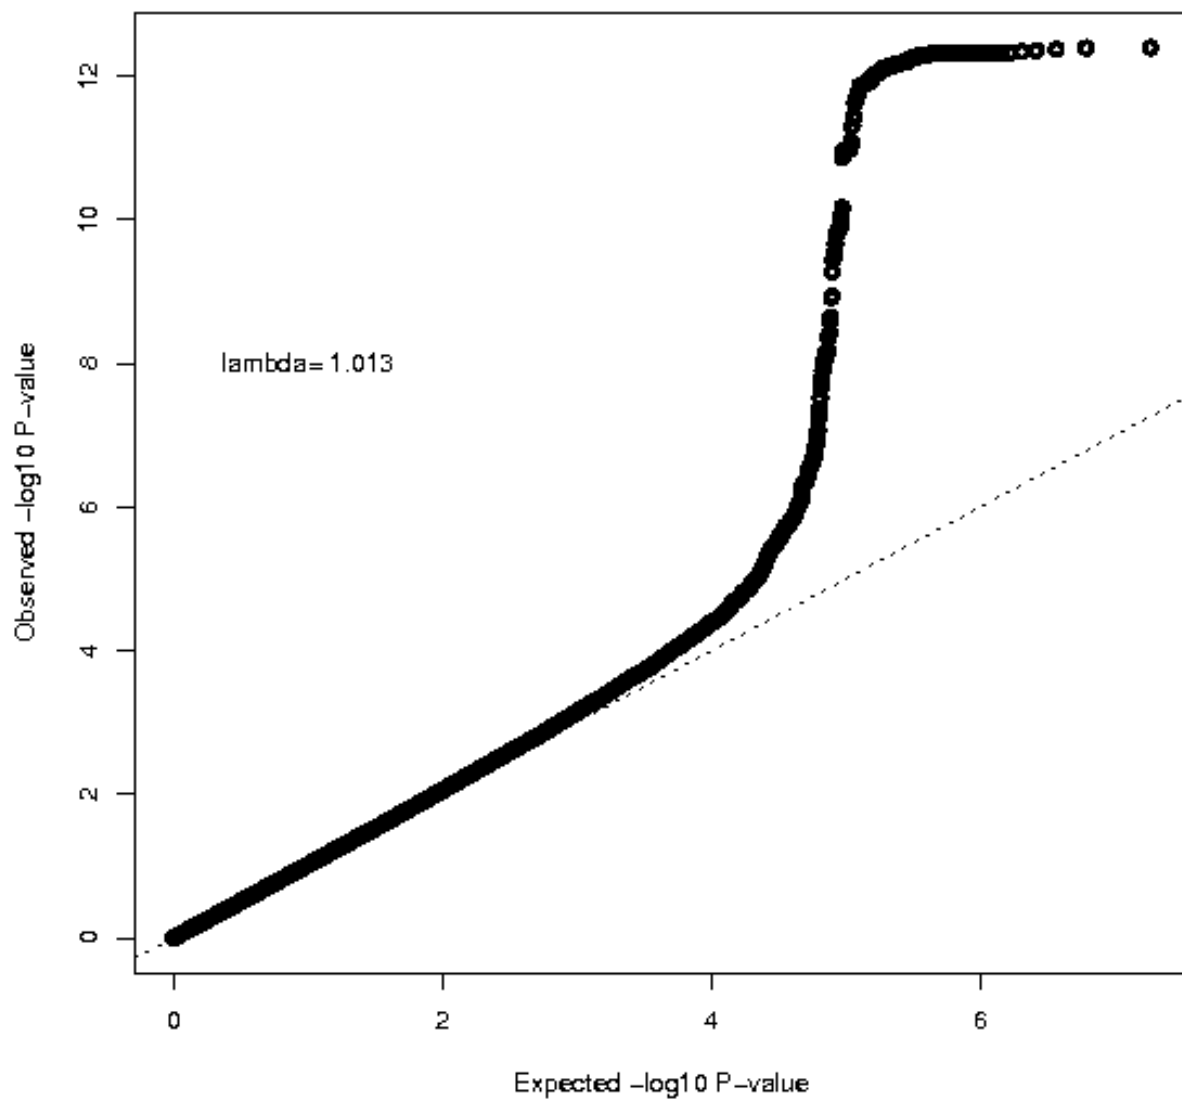

**Supplementary Figure 1.** Quantile-quantile plot of association results from meta-analysis of imputed and genotyped SNPs and risk of endometrial cancer.

**Supplementary Table 1. Meta-analysis results for SNPs reaching genome-wide significance.**

| Marker Name    | Chr. | Position  | A1 | A2 | Beta Estimate | Standard Error | P-value  | Direction of Effect in Each Contributing Study | Heterozygosity Chi-Square Statistic | Heterozygosity DF | Heterozygosity P-Value |
|----------------|------|-----------|----|----|---------------|----------------|----------|------------------------------------------------|-------------------------------------|-------------------|------------------------|
| <b>6q22.31</b> |      |           |    |    |               |                |          |                                                |                                     |                   |                        |
| rs2797160      | 6    | 126010116 | a  | g  | 0.1942        | 0.0268         | 4.04E-13 | ++++                                           | 0.174                               | 3                 | 0.9817                 |
| rs1777226      | 6    | 126017691 | a  | c  | -0.1939       | 0.0267         | 4.08E-13 | ----                                           | 0.158                               | 3                 | 0.984                  |
| rs1739354      | 6    | 126017808 | c  | g  | -0.1937       | 0.0267         | 4.28E-13 | ----                                           | 0.154                               | 3                 | 0.9847                 |
| rs6910933      | 6    | 126017155 | c  | g  | 0.1935        | 0.0267         | 4.43E-13 | ++++                                           | 0.178                               | 3                 | 0.9811                 |
| rs6934435      | 6    | 126017481 | t  | g  | 0.1934        | 0.0267         | 4.62E-13 | ++++                                           | 0.155                               | 3                 | 0.9844                 |
| rs1739362      | 6    | 126020703 | a  | t  | 0.1934        | 0.0267         | 4.74E-13 | ++++                                           | 0.142                               | 3                 | 0.9863                 |
| rs1777225      | 6    | 126018270 | t  | c  | 0.1934        | 0.0267         | 4.74E-13 | ++++                                           | 0.168                               | 3                 | 0.9826                 |
| rs12717178     | 6    | 126016499 | a  | g  | -0.1932       | 0.0267         | 4.79E-13 | ----                                           | 0.186                               | 3                 | 0.9798                 |
| rs6933302      | 6    | 126016951 | t  | c  | 0.1932        | 0.0267         | 4.79E-13 | ++++                                           | 0.186                               | 3                 | 0.9798                 |
| rs6933471      | 6    | 126017029 | t  | g  | 0.1932        | 0.0267         | 4.79E-13 | ++++                                           | 0.186                               | 3                 | 0.9798                 |
| rs1739355      | 6    | 126018114 | a  | g  | 0.1933        | 0.0267         | 4.80E-13 | ++++                                           | 0.148                               | 3                 | 0.9854                 |
| rs6927161      | 6    | 126015954 | t  | c  | 0.1932        | 0.0267         | 4.82E-13 | ++++                                           | 0.188                               | 3                 | 0.9795                 |
| rs6904992      | 6    | 126016003 | a  | g  | -0.1932       | 0.0267         | 4.82E-13 | ----                                           | 0.188                               | 3                 | 0.9795                 |
| rs1739373      | 6    | 126011509 | a  | g  | 0.1932        | 0.0267         | 4.84E-13 | ++++                                           | 0.16                                | 3                 | 0.9837                 |
| rs1739349      | 6    | 126014984 | c  | g  | -0.1931       | 0.0267         | 4.87E-13 | ----                                           | 0.188                               | 3                 | 0.9795                 |
| rs1578793      | 6    | 126015057 | a  | g  | 0.1931        | 0.0267         | 4.87E-13 | ++++                                           | 0.188                               | 3                 | 0.9795                 |
| rs1578794      | 6    | 126015469 | t  | c  | 0.1931        | 0.0267         | 4.87E-13 | ++++                                           | 0.188                               | 3                 | 0.9795                 |
| rs1739368      | 6    | 126011079 | t  | c  | -0.193        | 0.0267         | 4.93E-13 | ----                                           | 0.185                               | 3                 | 0.98                   |
| rs1739347      | 6    | 126014157 | t  | c  | -0.1931       | 0.0267         | 4.93E-13 | ----                                           | 0.187                               | 3                 | 0.9797                 |
| rs1739348      | 6    | 126014573 | t  | c  | 0.1931        | 0.0267         | 4.93E-13 | ++++                                           | 0.188                               | 3                 | 0.9795                 |

|            |   |           |   |   |         |        |          |      |       |   |        |
|------------|---|-----------|---|---|---------|--------|----------|------|-------|---|--------|
| rs1739371  | 6 | 126011291 | a | g | -0.193  | 0.0267 | 4.95E-13 | ---- | 0.183 | 3 | 0.9802 |
| rs1739378  | 6 | 126012262 | a | c | -0.1931 | 0.0267 | 4.95E-13 | ---- | 0.189 | 3 | 0.9793 |
| rs2797162  | 6 | 126011381 | t | g | -0.193  | 0.0267 | 5.06E-13 | ---- | 0.189 | 3 | 0.9793 |
| rs1739372  | 6 | 126011325 | a | g | -0.193  | 0.0267 | 5.08E-13 | ---- | 0.188 | 3 | 0.9796 |
| rs984041   | 6 | 126021328 | a | t | 0.193   | 0.0267 | 5.09E-13 | ++++ | 0.142 | 3 | 0.9864 |
| rs1739363  | 6 | 126020980 | a | g | -0.193  | 0.0267 | 5.22E-13 | ---- | 0.139 | 3 | 0.9868 |
| rs926853   | 6 | 126021435 | a | t | 0.1929  | 0.0267 | 5.27E-13 | ++++ | 0.144 | 3 | 0.9861 |
| rs1777222  | 6 | 126021030 | t | c | -0.1928 | 0.0267 | 5.47E-13 | ---- | 0.142 | 3 | 0.9863 |
| rs2797154  | 6 | 126005197 | a | g | -0.1926 | 0.0267 | 5.48E-13 | ---- | 0.108 | 3 | 0.9908 |
| rs984040   | 6 | 126021277 | t | c | 0.1927  | 0.0267 | 5.67E-13 | ++++ | 0.142 | 3 | 0.9864 |
| rs2747717  | 6 | 126008435 | a | g | 0.1923  | 0.0267 | 5.78E-13 | ++++ | 0.185 | 3 | 0.9799 |
| rs2797159  | 6 | 126009557 | a | g | -0.1923 | 0.0267 | 5.86E-13 | ---- | 0.168 | 3 | 0.9825 |
| rs2747721  | 6 | 126009527 | a | g | 0.1921  | 0.0267 | 6.41E-13 | ++++ | 0.152 | 3 | 0.985  |
| rs2747722  | 6 | 126009629 | a | g | 0.1918  | 0.0267 | 6.50E-13 | ++++ | 0.161 | 3 | 0.9836 |
| rs2797158  | 6 | 126009398 | a | g | -0.1918 | 0.0267 | 6.57E-13 | ---- | 0.162 | 3 | 0.9835 |
| rs2747720  | 6 | 126009458 | a | g | 0.1918  | 0.0267 | 6.57E-13 | ++++ | 0.162 | 3 | 0.9835 |
| rs2747718  | 6 | 126009109 | a | c | -0.1917 | 0.0267 | 6.69E-13 | ---- | 0.157 | 3 | 0.9842 |
| rs1777224  | 6 | 126019527 | t | c | 0.1921  | 0.0267 | 6.80E-13 | ++++ | 0.092 | 3 | 0.9928 |
| rs2747719  | 6 | 126009214 | t | c | -0.1916 | 0.0267 | 6.81E-13 | ---- | 0.162 | 3 | 0.9835 |
| rs1418948  | 6 | 126007018 | t | c | -0.1913 | 0.0266 | 6.90E-13 | ---- | 0.172 | 3 | 0.982  |
| rs13328298 | 6 | 126016580 | a | g | -0.1924 | 0.0268 | 7.20E-13 | ---- | 0.21  | 3 | 0.976  |
| rs78602343 | 6 | 126019768 | t | c | 0.192   | 0.0268 | 7.34E-13 | ++++ | 0.154 | 3 | 0.9846 |
| rs983543   | 6 | 126005767 | a | g | 0.191   | 0.0266 | 7.42E-13 | ++++ | 0.173 | 3 | 0.9818 |
| rs76407388 | 6 | 126004194 | a | g | -0.1974 | 0.0275 | 7.49E-13 | ---- | 0.831 | 3 | 0.8419 |
| rs1739352  | 6 | 126005310 | t | c | -0.191  | 0.0266 | 7.50E-13 | ---- | 0.174 | 3 | 0.9817 |
| rs2747714  | 6 | 126007620 | a | g | 0.191   | 0.0266 | 7.58E-13 | ++++ | 0.176 | 3 | 0.9814 |
| rs4897153  | 6 | 126003403 | a | g | -0.1908 | 0.0266 | 7.84E-13 | ---- | 0.176 | 3 | 0.9813 |
| rs6910786  | 6 | 126017141 | a | t | 0.1916  | 0.0267 | 7.85E-13 | ++++ | 0.179 | 3 | 0.981  |

|           |   |           |   |   |         |        |          |      |       |   |        |
|-----------|---|-----------|---|---|---------|--------|----------|------|-------|---|--------|
| rs1777194 | 6 | 126004883 | a | g | 0.1908  | 0.0266 | 7.87E-13 | ++++ | 0.175 | 3 | 0.9815 |
| rs4897152 | 6 | 126002400 | a | g | -0.1908 | 0.0266 | 7.92E-13 | ---- | 0.177 | 3 | 0.9812 |
| rs1935979 | 6 | 126002774 | a | g | -0.1906 | 0.0266 | 8.34E-13 | ---- | 0.177 | 3 | 0.9811 |
| rs2747724 | 6 | 126004935 | a | g | 0.1905  | 0.0266 | 8.48E-13 | ++++ | 0.175 | 3 | 0.9816 |
| rs1739357 | 6 | 126019655 | t | g | 0.191   | 0.0267 | 9.03E-13 | ++++ | 0.095 | 3 | 0.9925 |
| rs9321050 | 6 | 126001568 | a | g | -0.1902 | 0.0266 | 9.25E-13 | ---- | 0.148 | 3 | 0.9856 |
| rs1739367 | 6 | 126004720 | t | g | 0.1901  | 0.0266 | 9.61E-13 | ++++ | 0.18  | 3 | 0.9808 |
| rs1777197 | 6 | 126007401 | a | g | -0.1909 | 0.0268 | 9.73E-13 | ---- | 0.107 | 3 | 0.991  |
| rs1954360 | 6 | 126001064 | a | g | -0.19   | 0.0266 | 9.81E-13 | ---- | 0.148 | 3 | 0.9855 |
| rs1954361 | 6 | 126001423 | c | g | -0.19   | 0.0266 | 9.82E-13 | ---- | 0.148 | 3 | 0.9855 |
| rs9491471 | 6 | 125991715 | t | c | 0.1898  | 0.0266 | 1.02E-12 | ++++ | 0.168 | 3 | 0.9825 |
| rs1935772 | 6 | 125994708 | t | c | -0.1893 | 0.0266 | 1.18E-12 | ---- | 0.145 | 3 | 0.986  |
| rs6904069 | 6 | 125995134 | a | g | 0.1892  | 0.0266 | 1.21E-12 | ++++ | 0.139 | 3 | 0.9868 |
| rs4897151 | 6 | 125993202 | t | g | -0.1893 | 0.0266 | 1.21E-12 | ---- | 0.162 | 3 | 0.9834 |
| rs1832938 | 6 | 125988964 | c | g | 0.1895  | 0.0267 | 1.21E-12 | ++++ | 0.185 | 3 | 0.9799 |
| rs2211419 | 6 | 125995533 | a | g | -0.1892 | 0.0266 | 1.22E-12 | ---- | 0.136 | 3 | 0.9872 |
| rs6940748 | 6 | 125994080 | t | c | 0.189   | 0.0266 | 1.29E-12 | ++++ | 0.129 | 3 | 0.9881 |
| rs6569435 | 6 | 125998186 | t | c | -0.189  | 0.0266 | 1.29E-12 | ---- | 0.136 | 3 | 0.9873 |
| rs1418642 | 6 | 125999768 | a | g | 0.189   | 0.0266 | 1.30E-12 | ++++ | 0.135 | 3 | 0.9874 |
| rs2211420 | 6 | 125995549 | t | c | -0.189  | 0.0266 | 1.31E-12 | ---- | 0.139 | 3 | 0.9868 |
| rs8180614 | 6 | 126000599 | c | g | 0.1888  | 0.0266 | 1.36E-12 | ++++ | 0.136 | 3 | 0.9872 |
| rs1418641 | 6 | 125999854 | t | c | 0.1888  | 0.0266 | 1.36E-12 | ++++ | 0.137 | 3 | 0.9871 |
| rs1418640 | 6 | 125999866 | a | g | 0.1888  | 0.0266 | 1.36E-12 | ++++ | 0.137 | 3 | 0.9871 |
| rs4895798 | 6 | 126000162 | a | g | -0.1888 | 0.0266 | 1.36E-12 | ---- | 0.137 | 3 | 0.9871 |
| rs1832980 | 6 | 125997444 | t | g | -0.1887 | 0.0266 | 1.39E-12 | ---- | 0.137 | 3 | 0.987  |
| rs1935774 | 6 | 125996661 | t | c | 0.1877  | 0.0266 | 1.70E-12 | ++++ | 0.079 | 3 | 0.9942 |
| rs1418639 | 6 | 125999940 | t | c | 0.1883  | 0.0267 | 1.78E-12 | ++++ | 0.074 | 3 | 0.9947 |
| rs1935773 | 6 | 125996475 | a | g | -0.1875 | 0.0266 | 1.95E-12 | ---- | 0.098 | 3 | 0.9921 |

|            |   |           |   |   |         |        |          |      |       |   |        |
|------------|---|-----------|---|---|---------|--------|----------|------|-------|---|--------|
| rs28629380 | 6 | 126004197 | a | g | -0.1881 | 0.0268 | 2.10E-12 | ---- | 0.203 | 3 | 0.9771 |
| rs1832979  | 6 | 125997436 | a | g | -0.1866 | 0.0266 | 2.28E-12 | ---- | 0.075 | 3 | 0.9946 |
| rs9401843  | 6 | 126004124 | t | c | -0.1877 | 0.0268 | 2.33E-12 | ---- | 0.094 | 3 | 0.9925 |
| rs1739364  | 6 | 126022383 | a | g | -0.183  | 0.0268 | 8.21E-12 | ---- | 0.15  | 3 | 0.9852 |
| rs12527010 | 6 | 125991507 | a | g | 0.18    | 0.0264 | 9.91E-12 | ++++ | 0.081 | 3 | 0.9941 |
| rs2747715  | 6 | 126007719 | a | t | 0.1817  | 0.0267 | 1.05E-11 | ++++ | 0.126 | 3 | 0.9885 |
| rs1630556  | 6 | 126013155 | a | g | 0.1822  | 0.0268 | 1.05E-11 | ++++ | 0.151 | 3 | 0.9851 |
| rs1739380  | 6 | 126012858 | t | c | 0.1821  | 0.0268 | 1.06E-11 | ++++ | 0.151 | 3 | 0.9851 |
| rs1777183  | 6 | 126011995 | a | c | 0.1821  | 0.0268 | 1.07E-11 | ++++ | 0.151 | 3 | 0.9851 |
| rs1739375  | 6 | 126012013 | t | c | 0.1821  | 0.0268 | 1.07E-11 | ++++ | 0.151 | 3 | 0.9851 |
| rs1739376  | 6 | 126012084 | c | g | 0.1821  | 0.0268 | 1.07E-11 | ++++ | 0.151 | 3 | 0.9851 |
| rs1739377  | 6 | 126012236 | t | c | 0.1821  | 0.0268 | 1.07E-11 | ++++ | 0.151 | 3 | 0.9851 |
| rs1739379  | 6 | 126012593 | t | c | 0.1821  | 0.0268 | 1.08E-11 | ++++ | 0.15  | 3 | 0.9852 |
| rs1739374  | 6 | 126011825 | t | c | -0.1821 | 0.0268 | 1.08E-11 | ---- | 0.151 | 3 | 0.9851 |
| rs2747725  | 6 | 126012397 | t | g | 0.1821  | 0.0268 | 1.08E-11 | ++++ | 0.152 | 3 | 0.985  |
| rs1777182  | 6 | 126013614 | a | t | -0.182  | 0.0268 | 1.09E-11 | ---- | 0.148 | 3 | 0.9856 |
| rs1777195  | 6 | 126006861 | a | c | 0.1806  | 0.0267 | 1.37E-11 | ++++ | 0.126 | 3 | 0.9885 |
| rs1612249  | 6 | 126014916 | a | c | -0.1948 | 0.0299 | 6.85E-11 | --?- | 0.133 | 2 | 0.9358 |
| rs78229684 | 6 | 126007996 | t | c | -0.1916 | 0.0295 | 8.47E-11 | --?- | 0.171 | 2 | 0.9181 |
| rs1612274  | 6 | 126014907 | a | c | -0.1759 | 0.0273 | 1.09E-10 | ---- | 0.976 | 3 | 0.8071 |
| rs1739366  | 6 | 126007409 | t | c | 0.191   | 0.0297 | 1.18E-10 | ++?+ | 0.107 | 2 | 0.948  |
| rs1343120  | 6 | 125992810 | a | g | -0.1897 | 0.0295 | 1.32E-10 | --?- | 0.165 | 2 | 0.921  |
| rs1739370  | 6 | 126011231 | t | c | -0.1739 | 0.0271 | 1.32E-10 | ---- | 0.892 | 3 | 0.8274 |
| rs1418951  | 6 | 125996185 | a | g | -0.1894 | 0.0295 | 1.38E-10 | --?- | 0.136 | 2 | 0.9341 |
| rs1739358  | 6 | 126019736 | a | g | -0.1909 | 0.0298 | 1.49E-10 | --?- | 0.121 | 2 | 0.9414 |
| rs77678056 | 6 | 126019738 | a | g | 0.1908  | 0.0298 | 1.52E-10 | ++?+ | 0.121 | 2 | 0.9413 |
| rs926854   | 6 | 126021780 | a | g | 0.1907  | 0.0298 | 1.56E-10 | ++?+ | 0.315 | 2 | 0.8541 |
| rs926855   | 6 | 126021782 | a | g | 0.1905  | 0.0298 | 1.63E-10 | ++?+ | 0.316 | 2 | 0.854  |

|            |   |           |   |   |         |        |          |      |       |   |        |
|------------|---|-----------|---|---|---------|--------|----------|------|-------|---|--------|
| rs80303782 | 6 | 126004193 | t | c | 0.1941  | 0.0306 | 2.24E-10 | ++?+ | 0.522 | 2 | 0.7704 |
| rs1418637  | 6 | 125992553 | a | g | -0.1702 | 0.027  | 2.84E-10 | ---- | 1.004 | 3 | 0.8003 |
| rs2211418  | 6 | 125995503 | a | g | 0.1861  | 0.0296 | 3.11E-10 | ++?+ | 0.101 | 2 | 0.9505 |
| rs2326292  | 6 | 125999674 | a | g | 0.1696  | 0.027  | 3.26E-10 | ++++ | 0.895 | 3 | 0.8265 |
| rs2797161  | 6 | 126010789 | a | g | 0.1927  | 0.0307 | 3.60E-10 | ++?+ | 0.122 | 2 | 0.9407 |
| rs2747723  | 6 | 126010790 | t | c | -0.1926 | 0.0307 | 3.62E-10 | --?- | 0.119 | 2 | 0.9423 |
| rs1832937  | 6 | 125985934 | a | g | 0.1654  | 0.0267 | 5.41E-10 | ++++ | 0.029 | 3 | 0.9987 |
| rs1777198  | 6 | 126007416 | t | c | -0.1809 | 0.0298 | 1.22E-09 | --?- | 0.067 | 2 | 0.967  |
| rs1777220  | 6 | 126022602 | t | g | -0.1591 | 0.027  | 3.85E-09 | ---- | 1.022 | 3 | 0.7959 |
| rs2226158  | 6 | 125995467 | a | g | 0.1733  | 0.0295 | 4.06E-09 | ++?+ | 0.081 | 2 | 0.9604 |
| rs9491503  | 6 | 126031682 | a | g | -0.1581 | 0.0273 | 6.60E-09 | ---- | 0.336 | 3 | 0.9531 |
| rs1268093  | 6 | 126029235 | a | g | -0.1575 | 0.0272 | 6.98E-09 | ---- | 0.384 | 3 | 0.9436 |
| rs1268066  | 6 | 126035041 | t | c | -0.1579 | 0.0273 | 7.11E-09 | ---- | 0.369 | 3 | 0.9466 |
| rs1343121  | 6 | 126036184 | t | c | -0.1579 | 0.0273 | 7.17E-09 | ---- | 0.366 | 3 | 0.9473 |
| rs1269176  | 6 | 126029682 | a | t | -0.1577 | 0.0273 | 7.17E-09 | ---- | 0.379 | 3 | 0.9446 |
| rs6939969  | 6 | 126034563 | t | c | -0.1574 | 0.0272 | 7.50E-09 | ---- | 0.359 | 3 | 0.9485 |
| rs1268092  | 6 | 126029043 | t | c | -0.1569 | 0.0272 | 7.90E-09 | ---- | 0.326 | 3 | 0.9551 |
| rs6569437  | 6 | 126034540 | t | g | 0.1566  | 0.0272 | 8.78E-09 | ++++ | 0.327 | 3 | 0.9548 |
| rs1268067  | 6 | 126036621 | t | c | 0.1566  | 0.0273 | 9.40E-09 | ++++ | 0.255 | 3 | 0.9682 |
| rs6939865  | 6 | 126027318 | a | c | 0.169   | 0.0309 | 4.31E-08 | ++?+ | 0.025 | 2 | 0.9874 |

### 6p22.3

|           |   |          |   |   |         |        |          |      |       |   |        |
|-----------|---|----------|---|---|---------|--------|----------|------|-------|---|--------|
| rs1740828 | 6 | 21649085 | a | g | -0.1829 | 0.0327 | 2.29E-08 | ---- | 1.094 | 3 | 0.7785 |
|-----------|---|----------|---|---|---------|--------|----------|------|-------|---|--------|

### 13q22.1

|            |    |          |   |   |         |        |          |      |       |   |        |
|------------|----|----------|---|---|---------|--------|----------|------|-------|---|--------|
| rs9600103  | 13 | 73811879 | a | t | 0.2074  | 0.0299 | 3.76E-12 | ++++ | 0.39  | 3 | 0.9424 |
| rs7981863  | 13 | 73812141 | t | c | -0.2072 | 0.0299 | 3.93E-12 | ---- | 0.394 | 3 | 0.9416 |
| rs11841589 | 13 | 73814891 | t | g | -0.2066 | 0.0299 | 5.04E-12 | ---- | 0.521 | 3 | 0.9144 |
| rs9592895  | 13 | 73813982 | t | c | 0.1801  | 0.0281 | 1.53E-10 | ++++ | 0.375 | 3 | 0.9453 |
| rs7989799  | 13 | 73813436 | a | t | -0.1981 | 0.0332 | 2.49E-09 | --?- | 0.132 | 2 | 0.9363 |

|              |    |          |   |   |         |        |          |      |       |   |        |
|--------------|----|----------|---|---|---------|--------|----------|------|-------|---|--------|
| rs7988505    | 13 | 73813435 | c | g | 0.1979  | 0.0332 | 2.60E-09 | ++?+ | 0.129 | 2 | 0.9375 |
| <b>17q12</b> |    |          |   |   |         |        |          |      |       |   |        |
| rs11651052   | 17 | 36102381 | a | g | -0.1523 | 0.0267 | 1.18E-08 | ---- | 4.88  | 3 | 0.1808 |
| rs4430796    | 17 | 36098040 | a | g | 0.1511  | 0.0265 | 1.23E-08 | ++++ | 5.805 | 3 | 0.1215 |
| rs8064454    | 17 | 36101586 | a | c | -0.1507 | 0.0267 | 1.60E-08 | ---- | 4.488 | 3 | 0.2133 |
| rs11263763   | 17 | 36103565 | a | g | 0.1533  | 0.0271 | 1.62E-08 | ++++ | 4.614 | 3 | 0.2023 |
| rs11651755   | 17 | 36099840 | t | c | 0.1487  | 0.0266 | 2.20E-08 | ++++ | 5.125 | 3 | 0.1629 |
| rs11263761   | 17 | 36097775 | a | g | 0.1505  | 0.0272 | 3.05E-08 | ++++ | 5.081 | 3 | 0.1659 |

**Abbreviations--** Chr.: Chromosome, A1: Allele 1 (minor allele), A2: Allele 2

Top SNP at each locus highlighted in grey



**Supplementary Table 2a. Results from eQTL analysis of 6p22 region:  
endometrial tumour tissue.**

| TRAIT                                                | MARKER      | BP       | ALLELES | FREQ1  | RSQR   | EFFECT2 | STDERR | CHISQ  | PVALUE  |
|------------------------------------------------------|-------------|----------|---------|--------|--------|---------|--------|--------|---------|
| SNP association with <b>CASC15</b> sorted by p-value |             |          |         |        |        |         |        |        |         |
| CASC15                                               | rs546083928 | 21596246 | R,I     | 0.9877 | 0.6818 | -1.251  | 0.508  | 6.0715 | 0.01374 |
| CASC15                                               | rs543173991 | 21629474 | T,A     | 0.9884 | 0.7664 | -1.118  | 0.468  | 5.7084 | 0.01688 |
| CASC15                                               | rs190176895 | 21629550 | C,A     | 0.9877 | 0.7487 | -1.031  | 0.462  | 4.9942 | 0.02543 |
| CASC15                                               | rs111411936 | 21626246 | G,A     | 0.9877 | 0.7672 | -1.021  | 0.458  | 4.9656 | 0.02586 |
| CASC15                                               | rs7762989   | 21624153 | C,T     | 0.9883 | 0.8214 | -0.998  | 0.459  | 4.719  | 0.02983 |
| CASC15                                               | rs71657670  | 21613526 | R,D     | 0.9864 | 0.77   | -0.912  | 0.44   | 4.2926 | 0.03828 |
| CASC15                                               | rs76501983  | 21631411 | G,A     | 0.9854 | 0.8228 | -0.81   | 0.396  | 4.1772 | 0.04097 |
| CASC15                                               | rs78923341  | 21612472 | A,C     | 0.9872 | 0.895  | -0.797  | 0.411  | 3.7544 | 0.05267 |
| CASC15                                               | rs111228858 | 21612309 | G,A     | 0.9872 | 0.8945 | -0.797  | 0.411  | 3.7507 | 0.05279 |
| CASC15                                               | rs79169915  | 21607457 | G,A     | 0.9882 | 0.848  | -0.871  | 0.45   | 3.7445 | 0.05298 |
| CASC15                                               | rs112650104 | 21611568 | C,G     | 0.9871 | 0.889  | -0.791  | 0.412  | 3.6915 | 0.05469 |
| CASC15                                               | rs111412021 | 21606278 | T,C     | 0.9882 | 0.8163 | -0.889  | 0.466  | 3.6363 | 0.05653 |
| CASC15                                               | rs1744875   | 21648534 | C,A     | 0.4998 | 0.4732 | -0.237  | 0.126  | 3.5344 | 0.06011 |
| CASC15                                               | rs10557323  | 21615430 | R,D     | 0.9849 | 0.974  | -0.668  | 0.361  | 3.4317 | 0.06396 |
| CASC15                                               | rs77222012  | 21614945 | G,A     | 0.9849 | 0.9755 | -0.668  | 0.361  | 3.4286 | 0.06408 |
| CASC15                                               | rs75127321  | 21613946 | G,A     | 0.9849 | 0.9767 | -0.666  | 0.36   | 3.4167 | 0.06454 |
| CASC15                                               | rs6935968   | 21613156 | G,A     | 0.9849 | 0.9776 | -0.665  | 0.36   | 3.4112 | 0.06475 |
| CASC15                                               | rs112538002 | 21611751 | T,C     | 0.9848 | 0.97   | -0.659  | 0.361  | 3.3284 | 0.06809 |
| CASC15                                               | rs113842280 | 21611571 | T,G     | 0.9848 | 0.967  | -0.656  | 0.361  | 3.2996 | 0.0693  |
| CASC15                                               | rs112553613 | 21616239 | A,G     | 0.9848 | 0.9676 | -0.656  | 0.361  | 3.2977 | 0.06938 |
| CASC15                                               | rs1744866   | 21631188 | C,T     | 0.9885 | 0.3807 | 1.111   | 0.629  | 3.1167 | 0.0775  |
| CASC15                                               | rs78345714  | 21734098 | T,C     | 0.9849 | 0.6839 | 0.611   | 0.349  | 3.0665 | 0.07992 |
| CASC15                                               | rs76944255  | 21582643 | G,A     | 0.981  | 0.4687 | -0.739  | 0.422  | 3.0606 | 0.08021 |
| CASC15                                               | rs80061387  | 21579793 | T,C     | 0.9808 | 0.4585 | -0.738  | 0.425  | 3.0156 | 0.08246 |
| CASC15                                               | rs2251647   | 21677746 | C,A     | 0.9512 | 0.9786 | 0.348   | 0.201  | 2.9867 | 0.08395 |
| CASC15                                               | rs7738599   | 21631790 | A,G     | 0.9365 | 0.4203 | -0.465  | 0.274  | 2.8913 | 0.08906 |
| CASC15                                               | rs150997476 | 21663402 | A,T     | 0.9893 | 0.6383 | 0.914   | 0.541  | 2.8547 | 0.09111 |
| CASC15                                               | rs201453060 | 21648925 | R,I     | 0.5221 | 0.4872 | -0.209  | 0.124  | 2.8291 | 0.09257 |
| CASC15                                               | rs6941897   | 21671979 | C,A     | 0.9897 | 0.6097 | -0.795  | 0.475  | 2.8003 | 0.09424 |
| CASC15                                               | rs1740828   | 21649085 | A,G     | 0.5436 | 0.4642 | 0.204   | 0.123  | 2.7707 | 0.096   |
| CASC15                                               | rs1744881   | 21657548 | G,A     | 0.8047 | 0.8556 | 0.192   | 0.116  | 2.7454 | 0.09753 |
| CASC15                                               | rs114750919 | 21725361 | C,G     | 0.9867 | 0.8444 | 0.598   | 0.364  | 2.7002 | 0.1003  |
| CASC15                                               | rs68015368  | 21645499 | I,R     | 0.8315 | 0.7435 | 0.21    | 0.128  | 2.6976 | 0.1005  |
| CASC15                                               | rs72175369  | 21738076 | R,D     | 0.9214 | 0.781  | 0.282   | 0.173  | 2.6531 | 0.1033  |
| CASC15                                               | rs6912946   | 21659978 | A,T     | 0.8051 | 0.821  | 0.189   | 0.119  | 2.5524 | 0.1101  |
| CASC15                                               | rs7451817   | 21735497 | A,C     | 0.9341 | 0.9124 | 0.274   | 0.175  | 2.4574 | 0.117   |
| CASC15                                               | rs6939472   | 21661019 | G,C     | 0.7866 | 0.7792 | 0.181   | 0.118  | 2.3815 | 0.1228  |
| CASC15                                               | rs1744874   | 21640902 | T,C     | 0.7492 | 0.9047 | 0.157   | 0.103  | 2.3165 | 0.128   |
| CASC15                                               | rs138380902 | 21731187 | R,D     | 0.9079 | 0.9299 | 0.22    | 0.144  | 2.3167 | 0.128   |

|        |             |          |     |        |        |        |       |        |        |
|--------|-------------|----------|-----|--------|--------|--------|-------|--------|--------|
| CASC15 | rs111887738 | 21616944 | T,C | 0.9828 | 0.9369 | -0.516 | 0.339 | 2.3109 | 0.1285 |
| CASC15 | rs2144867   | 21689100 | C,T | 0.9874 | 0.3281 | 0.932  | 0.616 | 2.2887 | 0.1303 |
| CASC15 | rs113455272 | 21616778 | T,C | 0.9824 | 0.9392 | -0.505 | 0.334 | 2.2855 | 0.1306 |
| CASC15 | rs1744870   | 21638485 | A,C | 0.734  | 0.9006 | 0.151  | 0.102 | 2.197  | 0.1383 |
| CASC15 | rs1740834   | 21645207 | C,T | 0.7742 | 0.9378 | 0.152  | 0.105 | 2.1206 | 0.1453 |
| CASC15 | rs12528435  | 21562732 | G,A | 0.8866 | 0.355  | 0.311  | 0.214 | 2.1126 | 0.1461 |
| CASC15 | rs1740832   | 21646725 | A,G | 0.756  | 0.938  | 0.15   | 0.103 | 2.107  | 0.1466 |
| CASC15 | rs149699118 | 21633666 | D,R | 0.7515 | 0.8935 | 0.15   | 0.103 | 2.0998 | 0.1473 |
| CASC15 | rs1744873   | 21638871 | C,T | 0.7506 | 0.8981 | 0.15   | 0.104 | 2.0824 | 0.149  |
| CASC15 | rs1744871   | 21638566 | C,T | 0.7505 | 0.8974 | 0.15   | 0.104 | 2.076  | 0.1496 |
| CASC15 | rs1744872   | 21638599 | C,T | 0.7505 | 0.8975 | 0.15   | 0.104 | 2.0735 | 0.1499 |
| CASC15 | rs1744867   | 21634171 | T,C | 0.7381 | 0.8918 | 0.148  | 0.103 | 2.071  | 0.1501 |
| CASC15 | rs1740860   | 21678055 | T,C | 0.7991 | 0.7824 | 0.165  | 0.117 | 1.9721 | 0.1602 |
| CASC15 | rs201389513 | 21635326 | D,R | 0.7672 | 0.8696 | 0.149  | 0.107 | 1.9451 | 0.1631 |
| CASC15 | rs2749683   | 21635327 | T,G | 0.767  | 0.8784 | 0.147  | 0.107 | 1.9058 | 0.1674 |
| CASC15 | rs1744878   | 21652230 | A,C | 0.8076 | 0.9338 | 0.154  | 0.112 | 1.905  | 0.1675 |
| CASC15 | rs142355149 | 21692662 | A,C | 0.9804 | 0.36   | -0.712 | 0.518 | 1.8897 | 0.1692 |
| CASC15 | rs1740836   | 21634644 | G,A | 0.7705 | 0.8935 | 0.146  | 0.106 | 1.8892 | 0.1693 |
| CASC15 | rs1740825   | 21653689 | T,C | 0.7477 | 0.8767 | 0.141  | 0.103 | 1.8799 | 0.1703 |
| CASC15 | rs1620996   | 21602552 | C,T | 0.8959 | 0.8139 | 0.201  | 0.147 | 1.8751 | 0.1709 |
| CASC15 | rs5874825   | 21634749 | I,R | 0.7699 | 0.8924 | 0.145  | 0.106 | 1.8745 | 0.171  |
| CASC15 | rs7756206   | 21635314 | T,G | 0.7423 | 0.8724 | 0.142  | 0.104 | 1.8663 | 0.1719 |
| CASC15 | rs9358449   | 21732383 | G,A | 0.937  | 0.9915 | 0.231  | 0.17  | 1.8438 | 0.1745 |
| CASC15 | rs1740835   | 21637725 | G,A | 0.7724 | 0.8961 | 0.144  | 0.106 | 1.8179 | 0.1776 |
| CASC15 | rs12206842  | 21734489 | A,T | 0.9372 | 1      | 0.229  | 0.17  | 1.8169 | 0.1777 |
| CASC15 | rs1744890   | 21678059 | A,G | 0.8017 | 0.7924 | 0.157  | 0.117 | 1.8095 | 0.1786 |
| CASC15 | rs6456439   | 21645743 | T,G | 0.7125 | 0.9939 | 0.128  | 0.096 | 1.796  | 0.1802 |
| CASC15 | rs2749682   | 21641716 | A,G | 0.6939 | 0.947  | 0.127  | 0.095 | 1.7901 | 0.1809 |
| CASC15 | rs1615194   | 21648442 | T,C | 0.7437 | 0.9296 | 0.136  | 0.102 | 1.7892 | 0.181  |
| CASC15 | rs9466160   | 21722771 | A,G | 0.9736 | 0.8106 | -0.356 | 0.267 | 1.7804 | 0.1821 |
| CASC15 | rs35487983  | 21739331 | R,D | 0.6885 | 0.8315 | 0.127  | 0.095 | 1.7766 | 0.1826 |
| CASC15 | rs11433545  | 21672216 | R,I | 0.5947 | 0.6034 | -0.149 | 0.116 | 1.6424 | 0.2    |
| CASC15 | rs79521243  | 21581049 | T,C | 0.9405 | 0.5684 | -0.28  | 0.219 | 1.6386 | 0.2005 |
| CASC15 | rs111503674 | 21585461 | T,C | 0.941  | 0.5927 | -0.276 | 0.216 | 1.6372 | 0.2007 |
| CASC15 | rs76401928  | 21586715 | G,A | 0.9419 | 0.6097 | -0.272 | 0.214 | 1.6183 | 0.2033 |
| CASC15 | rs1740831   | 21647589 | G,A | 0.7131 | 0.9772 | 0.121  | 0.097 | 1.5764 | 0.2093 |
| CASC15 | rs12183824  | 21726382 | G,A | 0.8184 | 0.3562 | -0.216 | 0.176 | 1.5105 | 0.2191 |
| CASC15 | rs9295514   | 21636585 | A,G | 0.7107 | 0.9234 | 0.121  | 0.099 | 1.4956 | 0.2213 |
| CASC15 | rs59493338  | 21646242 | T,A | 0.701  | 0.8468 | 0.119  | 0.099 | 1.4443 | 0.2294 |
| CASC15 | rs9358448   | 21731736 | G,A | 0.9305 | 0.9625 | 0.197  | 0.166 | 1.409  | 0.2352 |
| CASC15 | rs60908846  | 21646239 | I,R | 0.758  | 0.8675 | 0.123  | 0.105 | 1.3625 | 0.2431 |
| CASC15 | rs80349490  | 21615188 | T,C | 0.9491 | 0.4807 | -0.341 | 0.293 | 1.3597 | 0.2436 |
| CASC15 | rs139581361 | 21722128 | G,A | 0.9879 | 0.8119 | -0.487 | 0.418 | 1.3577 | 0.2439 |
| CASC15 | rs1744876   | 21651003 | T,C | 0.8157 | 0.9901 | 0.126  | 0.108 | 1.3527 | 0.2448 |
| CASC15 | rs112617138 | 21576898 | A,G | 0.938  | 0.5193 | -0.258 | 0.223 | 1.3436 | 0.2464 |

|        |             |          |     |        |        |        |       |        |        |
|--------|-------------|----------|-----|--------|--------|--------|-------|--------|--------|
| CASC15 | rs112653724 | 21576915 | G,A | 0.9388 | 0.5234 | -0.258 | 0.223 | 1.3308 | 0.2487 |
| CASC15 | rs9348484   | 21731460 | C,G | 0.93   | 0.9619 | 0.186  | 0.166 | 1.2664 | 0.2605 |
| CASC15 | rs36027263  | 21648358 | I,R | 0.7129 | 0.8819 | 0.114  | 0.101 | 1.2618 | 0.2613 |
| CASC15 | rs9460655   | 21641564 | C,T | 0.6926 | 0.8571 | 0.109  | 0.097 | 1.2612 | 0.2614 |
| CASC15 | rs10643502  | 21641556 | T,C | 0.688  | 0.853  | 0.108  | 0.097 | 1.2283 | 0.2677 |
| CASC15 | rs1740866   | 21664729 | T,G | 0.7801 | 0.807  | 0.128  | 0.116 | 1.2193 | 0.2695 |
| CASC15 | rs6934807   | 21653677 | A,G | 0.9709 | 0.9814 | -0.248 | 0.232 | 1.1397 | 0.2857 |
| CASC15 | rs2759360   | 21653532 | A,G | 0.7648 | 0.8809 | 0.11   | 0.104 | 1.1058 | 0.293  |
| CASC15 | rs138387168 | 21716280 | C,T | 0.9765 | 0.7359 | -0.324 | 0.309 | 1.0998 | 0.2943 |
| CASC15 | rs114455294 | 21693186 | A,T | 0.9731 | 0.5546 | -0.314 | 0.301 | 1.0925 | 0.2959 |
| CASC15 | rs73737568  | 21667546 | A,G | 0.9719 | 0.8789 | -0.26  | 0.249 | 1.0865 | 0.2972 |
| CASC15 | rs12374633  | 21654974 | G,A | 0.9698 | 0.9337 | -0.241 | 0.233 | 1.067  | 0.3016 |
| CASC15 | rs113196987 | 21575419 | A,G | 0.9232 | 0.5162 | -0.208 | 0.202 | 1.0645 | 0.3022 |
| CASC15 | rs77401992  | 21579608 | A,G | 0.9474 | 0.5364 | -0.24  | 0.232 | 1.0637 | 0.3024 |
| CASC15 | rs75228175  | 21579117 | C,T | 0.9479 | 0.5358 | -0.24  | 0.233 | 1.0554 | 0.3043 |
| CASC15 | rs112243204 | 21582142 | T,C | 0.9498 | 0.5703 | -0.236 | 0.23  | 1.054  | 0.3046 |
| CASC15 | rs141673420 | 21695454 | T,C | 0.9835 | 0.3745 | -0.567 | 0.553 | 1.0512 | 0.3052 |
| CASC15 | rs149746556 | 21731479 | R,D | 0.9872 | 0.7098 | 0.415  | 0.408 | 1.0349 | 0.309  |
| CASC15 | rs147596047 | 21733524 | R,D | 0.9872 | 0.709  | 0.415  | 0.408 | 1.0334 | 0.3094 |
| CASC15 | rs77258728  | 21734254 | G,A | 0.9872 | 0.709  | 0.415  | 0.408 | 1.0327 | 0.3095 |
| CASC15 | rs75935729  | 21733252 | C,A | 0.9872 | 0.709  | 0.414  | 0.408 | 1.0306 | 0.31   |
| CASC15 | rs78584490  | 21732145 | C,T | 0.9872 | 0.7096 | 0.414  | 0.408 | 1.0307 | 0.31   |
| CASC15 | rs79693897  | 21695822 | R,D | 0.6627 | 0.717  | 0.105  | 0.104 | 1.0284 | 0.3105 |
| CASC15 | rs201513044 | 21589010 | R,D | 0.9897 | 0.4337 | -0.563 | 0.556 | 1.0241 | 0.3115 |
| CASC15 | rs530398575 | 21733586 | R,I | 0.8629 | 0.4934 | 0.168  | 0.167 | 1.0181 | 0.313  |
| CASC15 | rs146150526 | 21575243 | T,C | 0.9263 | 0.5346 | -0.203 | 0.202 | 1.0116 | 0.3145 |
| CASC15 | rs4710983   | 21734202 | C,T | 0.767  | 0.9462 | 0.096  | 0.096 | 1.0106 | 0.3148 |
| CASC15 | rs530522537 | 21694259 | R,D | 0.9305 | 0.6164 | -0.191 | 0.193 | 0.9818 | 0.3217 |
| CASC15 | rs1740827   | 21650969 | A,T | 0.7378 | 0.9342 | 0.099  | 0.1   | 0.9785 | 0.3226 |
| CASC15 | rs143393812 | 21633911 | C,T | 0.9816 | 0.5752 | -0.388 | 0.392 | 0.9773 | 0.3229 |
| CASC15 | rs7739235   | 21609345 | A,T | 0.9799 | 0.962  | -0.289 | 0.292 | 0.976  | 0.3232 |
| CASC15 | rs1740833   | 21646435 | A,G | 0.6798 | 0.9621 | 0.088  | 0.09  | 0.964  | 0.3262 |
| CASC15 | rs570404489 | 21689796 | R,D | 0.7798 | 0.3015 | 0.171  | 0.176 | 0.9495 | 0.3298 |
| CASC15 | rs111355896 | 21649454 | I,R | 0.7486 | 0.9074 | 0.1    | 0.102 | 0.9491 | 0.33   |
| CASC15 | rs35605844  | 21674022 | D,R | 0.6185 | 0.9309 | 0.088  | 0.091 | 0.9399 | 0.3323 |
| CASC15 | rs59187080  | 21668625 | G,A | 0.966  | 0.7875 | -0.226 | 0.233 | 0.938  | 0.3328 |
| CASC15 | rs16885189  | 21729682 | G,A | 0.8667 | 0.9973 | -0.114 | 0.119 | 0.9209 | 0.3372 |
| CASC15 | rs1740864   | 21668282 | G,A | 0.6096 | 0.9094 | 0.087  | 0.091 | 0.917  | 0.3383 |
| CASC15 | rs73374488  | 21666188 | G,A | 0.9707 | 0.8902 | -0.231 | 0.242 | 0.907  | 0.3409 |
| CASC15 | rs6933506   | 21673857 | T,C | 0.9717 | 0.871  | -0.237 | 0.251 | 0.8887 | 0.3458 |
| CASC15 | rs7739131   | 21727148 | C,T | 0.7149 | 0.9794 | 0.084  | 0.09  | 0.8816 | 0.3478 |
| CASC15 | rs113411153 | 21641562 | D,R | 0.7285 | 0.8541 | 0.097  | 0.103 | 0.8803 | 0.3481 |
| CASC15 | rs529643978 | 21641557 | D,R | 0.7285 | 0.854  | 0.097  | 0.103 | 0.8798 | 0.3482 |
| CASC15 | rs562290828 | 21641555 | D,R | 0.7285 | 0.8538 | 0.096  | 0.103 | 0.8786 | 0.3486 |
| CASC15 | rs1740863   | 21670641 | C,T | 0.6246 | 0.9994 | 0.083  | 0.088 | 0.8775 | 0.3489 |

|        |             |          |     |        |        |        |       |        |        |
|--------|-------------|----------|-----|--------|--------|--------|-------|--------|--------|
| CASC15 | rs370328808 | 21641504 | D,R | 0.7285 | 0.8536 | 0.096  | 0.103 | 0.8765 | 0.3492 |
| CASC15 | rs561593549 | 21641496 | C,T | 0.7285 | 0.8534 | 0.096  | 0.103 | 0.8764 | 0.3492 |
| CASC15 | rs73737557  | 21570448 | T,C | 0.9333 | 0.4619 | -0.215 | 0.229 | 0.8756 | 0.3494 |
| CASC15 | rs9460671   | 21731289 | G,C | 0.41   | 0.9868 | -0.076 | 0.083 | 0.8374 | 0.3601 |
| CASC15 | rs2749688   | 21658487 | G,C | 0.6992 | 0.8356 | 0.088  | 0.097 | 0.8167 | 0.3661 |
| CASC15 | rs35612989  | 21663201 | R,I | 0.4311 | 0.4511 | -0.111 | 0.123 | 0.8149 | 0.3667 |
| CASC15 | rs7744188   | 21694601 | T,C | 0.9149 | 0.6416 | -0.148 | 0.165 | 0.809  | 0.3684 |
| CASC15 | rs148261621 | 21712086 | R,I | 0.7162 | 0.7178 | 0.099  | 0.11  | 0.8074 | 0.3689 |
| CASC15 | rs1744882   | 21657561 | T,G | 0.7003 | 0.8473 | 0.087  | 0.097 | 0.8004 | 0.371  |
| CASC15 | rs941990    | 21658881 | A,G | 0.6778 | 0.8561 | 0.082  | 0.092 | 0.7927 | 0.3733 |
| CASC15 | rs143796183 | 21587351 | G,A | 0.9851 | 0.3168 | -0.629 | 0.709 | 0.7858 | 0.3754 |
| CASC15 | rs1744880   | 21653046 | A,G | 0.6868 | 0.9845 | 0.077  | 0.087 | 0.7854 | 0.3755 |
| CASC15 | rs113975012 | 21712110 | A,T | 0.9843 | 0.5172 | -0.423 | 0.478 | 0.783  | 0.3762 |
| CASC15 | rs1744884   | 21663449 | G,A | 0.7593 | 0.786  | 0.099  | 0.112 | 0.7825 | 0.3764 |
| CASC15 | rs1740852   | 21608979 | T,C | 0.895  | 0.9932 | 0.117  | 0.132 | 0.7798 | 0.3772 |
| CASC15 | rs1740867   | 21663105 | C,T | 0.7594 | 0.7883 | 0.098  | 0.112 | 0.7688 | 0.3806 |
| CASC15 | rs79883278  | 21720741 | C,T | 0.9819 | 0.8353 | 0.255  | 0.291 | 0.7673 | 0.381  |
| CASC15 | rs7757467   | 21718123 | C,T | 0.9813 | 0.9676 | 0.241  | 0.277 | 0.758  | 0.384  |
| CASC15 | rs4712632   | 21732137 | G,A | 0.4138 | 0.9644 | -0.071 | 0.082 | 0.7523 | 0.3857 |
| CASC15 | rs55686449  | 21702505 | T,C | 0.6687 | 0.8289 | 0.084  | 0.098 | 0.748  | 0.3871 |
| CASC15 | rs9368332   | 21731094 | G,A | 0.4156 | 0.9974 | -0.07  | 0.082 | 0.7412 | 0.3893 |
| CASC15 | rs115900264 | 21738499 | A,G | 0.8705 | 0.965  | -0.106 | 0.123 | 0.7387 | 0.3901 |
| CASC15 | rs534329540 | 21629251 | R,I | 0.4972 | 0.5784 | -0.095 | 0.11  | 0.7355 | 0.3911 |
| CASC15 | rs141007801 | 21722788 | R,I | 0.8394 | 0.8482 | 0.109  | 0.127 | 0.7301 | 0.3929 |
| CASC15 | rs1740837   | 21633917 | C,T | 0.6783 | 0.9174 | 0.078  | 0.092 | 0.7278 | 0.3936 |
| CASC15 | rs1744879   | 21652741 | A,G | 0.6892 | 0.9997 | 0.074  | 0.087 | 0.7254 | 0.3944 |
| CASC15 | rs7739666   | 21718260 | T,C | 0.9818 | 0.939  | 0.241  | 0.283 | 0.7248 | 0.3946 |
| CASC15 | rs9460657   | 21660051 | C,T | 0.8938 | 0.8161 | -0.115 | 0.136 | 0.7143 | 0.398  |
| CASC15 | rs62403971  | 21702621 | T,C | 0.6704 | 0.8339 | 0.082  | 0.097 | 0.7136 | 0.3983 |
| CASC15 | rs77991965  | 21694060 | G,A | 0.9358 | 0.6372 | -0.17  | 0.201 | 0.7131 | 0.3984 |
| CASC15 | rs4712628   | 21702070 | C,G | 0.6704 | 0.828  | 0.082  | 0.098 | 0.7095 | 0.3996 |
| CASC15 | rs79164129  | 21601917 | T,C | 0.9855 | 0.3283 | 0.509  | 0.606 | 0.7066 | 0.4006 |
| CASC15 | rs1740830   | 21648615 | C,T | 0.867  | 0.7367 | 0.121  | 0.144 | 0.7047 | 0.4012 |
| CASC15 | rs11757166  | 21652990 | C,T | 0.6883 | 0.9879 | 0.073  | 0.087 | 0.7035 | 0.4016 |
| CASC15 | rs140066406 | 21728813 | R,I | 0.8701 | 0.9744 | -0.101 | 0.121 | 0.7006 | 0.4026 |
| CASC15 | rs7754999   | 21705723 | C,T | 0.6691 | 0.8543 | 0.08   | 0.096 | 0.6935 | 0.405  |
| CASC15 | rs7757232   | 21717818 | G,A | 0.9819 | 0.9404 | 0.235  | 0.283 | 0.6911 | 0.4058 |
| CASC15 | rs11380611  | 21703686 | R,I | 0.6704 | 0.84   | 0.08   | 0.097 | 0.6866 | 0.4073 |
| CASC15 | rs10946462  | 21651830 | C,T | 0.6894 | 0.9828 | 0.073  | 0.088 | 0.686  | 0.4075 |
| CASC15 | rs7753199   | 21717706 | G,A | 0.9819 | 0.9391 | 0.234  | 0.283 | 0.6853 | 0.4078 |
| CASC15 | rs4710981   | 21732702 | G,C | 0.4166 | 0.9635 | -0.068 | 0.082 | 0.685  | 0.4079 |
| CASC15 | rs6933476   | 21720156 | G,A | 0.9819 | 0.8936 | 0.237  | 0.288 | 0.6793 | 0.4098 |
| CASC15 | rs4712633   | 21738249 | A,G | 0.8598 | 1      | -0.097 | 0.117 | 0.6788 | 0.41   |
| CASC15 | rs7739775   | 21727465 | C,T | 0.87   | 0.9769 | -0.099 | 0.121 | 0.6743 | 0.4116 |
| CASC15 | rs561618338 | 21639342 | R,I | 0.9855 | 0.4795 | -0.402 | 0.491 | 0.6714 | 0.4126 |

|        |             |          |     |        |        |        |       |        |        |
|--------|-------------|----------|-----|--------|--------|--------|-------|--------|--------|
| CASC15 | rs11753001  | 21726506 | T,C | 0.9147 | 0.5112 | -0.175 | 0.214 | 0.6643 | 0.4151 |
| CASC15 | rs7760462   | 21730877 | G,C | 0.4165 | 0.9846 | -0.067 | 0.082 | 0.6637 | 0.4152 |
| CASC15 | rs2180418   | 21690172 | A,G | 0.8397 | 0.9885 | 0.091  | 0.112 | 0.6626 | 0.4156 |
| CASC15 | rs12525631  | 21730840 | C,T | 0.8794 | 0.9968 | -0.102 | 0.125 | 0.6627 | 0.4156 |
| CASC15 | rs9460659   | 21696569 | G,C | 0.6689 | 0.7266 | 0.084  | 0.104 | 0.6624 | 0.4157 |
| CASC15 | rs840981    | 21740238 | G,A | 0.4381 | 1      | -0.066 | 0.081 | 0.6618 | 0.4159 |
| CASC15 | rs1744877   | 21651554 | T,C | 0.6891 | 0.9768 | 0.071  | 0.088 | 0.6579 | 0.4173 |
| CASC15 | rs73376030  | 21700390 | T,G | 0.6688 | 0.8019 | 0.08   | 0.099 | 0.6573 | 0.4175 |
| CASC15 | rs6933751   | 21704108 | T,C | 0.672  | 0.8471 | 0.078  | 0.097 | 0.6547 | 0.4184 |
| CASC15 | rs2328624   | 21703736 | G,C | 0.672  | 0.8448 | 0.078  | 0.097 | 0.6534 | 0.4189 |
| CASC15 | rs2328625   | 21703880 | T,C | 0.6717 | 0.8446 | 0.078  | 0.097 | 0.6528 | 0.4191 |
| CASC15 | rs2328626   | 21703885 | C,T | 0.6717 | 0.8448 | 0.078  | 0.097 | 0.6525 | 0.4192 |
| CASC15 | rs6927945   | 21703341 | T,C | 0.672  | 0.841  | 0.078  | 0.097 | 0.6527 | 0.4192 |
| CASC15 | rs1740826   | 21651528 | G,A | 0.6892 | 0.9762 | 0.071  | 0.088 | 0.6516 | 0.4196 |
| CASC15 | rs57442902  | 21704602 | C,T | 0.6719 | 0.8494 | 0.078  | 0.097 | 0.6497 | 0.4202 |
| CASC15 | rs9466155   | 21707222 | G,A | 0.6726 | 0.8766 | 0.077  | 0.095 | 0.6487 | 0.4206 |
| CASC15 | rs11751574  | 21702901 | G,A | 0.6716 | 0.8382 | 0.078  | 0.097 | 0.6452 | 0.4218 |
| CASC15 | rs7761575   | 21701475 | C,T | 0.672  | 0.8148 | 0.079  | 0.099 | 0.6435 | 0.4225 |
| CASC15 | rs1744885   | 21670816 | A,G | 0.4476 | 0.9803 | -0.074 | 0.092 | 0.6431 | 0.4226 |
| CASC15 | rs4712627   | 21701892 | C,T | 0.6719 | 0.828  | 0.078  | 0.098 | 0.6419 | 0.423  |
| CASC15 | rs7761844   | 21701456 | G,A | 0.6722 | 0.8149 | 0.079  | 0.099 | 0.6421 | 0.423  |
| CASC15 | rs7761595   | 21701550 | A,G | 0.6721 | 0.8165 | 0.079  | 0.099 | 0.6415 | 0.4232 |
| CASC15 | rs62403969  | 21702409 | A,C | 0.6716 | 0.8327 | 0.078  | 0.098 | 0.641  | 0.4234 |
| CASC15 | rs4712629   | 21702103 | A,G | 0.6716 | 0.83   | 0.078  | 0.098 | 0.6396 | 0.4239 |
| CASC15 | rs4712630   | 21702161 | T,C | 0.6716 | 0.8305 | 0.078  | 0.098 | 0.6389 | 0.4241 |
| CASC15 | rs182063949 | 21738643 | T,A | 0.9864 | 0.6453 | 0.33   | 0.414 | 0.6362 | 0.4251 |
| CASC15 | rs7762010   | 21701594 | G,A | 0.6719 | 0.8177 | 0.079  | 0.098 | 0.636  | 0.4252 |
| CASC15 | rs78937245  | 21738761 | C,T | 0.9864 | 0.6447 | 0.33   | 0.414 | 0.6338 | 0.426  |
| CASC15 | rs840982    | 21740321 | T,C | 0.4378 | 0.9967 | -0.065 | 0.081 | 0.633  | 0.4263 |
| CASC15 | rs1744858   | 21626190 | T,C | 0.6849 | 0.9807 | 0.071  | 0.089 | 0.6328 | 0.4263 |
| CASC15 | rs6904795   | 21703099 | A,G | 0.6649 | 0.8486 | 0.077  | 0.096 | 0.6309 | 0.427  |
| CASC15 | rs112153247 | 21701183 | C,T | 0.6716 | 0.8121 | 0.078  | 0.099 | 0.6292 | 0.4277 |
| CASC15 | rs62406887  | 21701319 | C,T | 0.6717 | 0.8135 | 0.078  | 0.099 | 0.6274 | 0.4283 |
| CASC15 | rs59730691  | 21701056 | C,T | 0.6717 | 0.8117 | 0.078  | 0.099 | 0.6272 | 0.4284 |
| CASC15 | rs1740841   | 21627053 | G,T | 0.6852 | 0.9798 | 0.07   | 0.089 | 0.6242 | 0.4295 |
| CASC15 | rs13362741  | 21700158 | A,C | 0.6707 | 0.8039 | 0.078  | 0.099 | 0.6222 | 0.4302 |
| CASC15 | rs6456443   | 21716233 | G,A | 0.9818 | 0.9202 | 0.224  | 0.284 | 0.6222 | 0.4302 |
| CASC15 | rs62406886  | 21701119 | T,C | 0.6631 | 0.8167 | 0.077  | 0.098 | 0.6191 | 0.4314 |
| CASC15 | rs9460670   | 21731138 | C,A | 0.877  | 0.9736 | -0.098 | 0.125 | 0.6173 | 0.4321 |
| CASC15 | rs1744859   | 21626395 | T,C | 0.685  | 0.9803 | 0.07   | 0.089 | 0.6158 | 0.4326 |
| CASC15 | rs1740843   | 21623041 | G,A | 0.6876 | 0.9919 | 0.07   | 0.089 | 0.6113 | 0.4343 |
| CASC15 | rs7751397   | 21662535 | C,T | 0.9285 | 0.8402 | -0.129 | 0.166 | 0.609  | 0.4352 |
| CASC15 | rs7771671   | 21662524 | T,G | 0.9284 | 0.8382 | -0.129 | 0.166 | 0.6083 | 0.4354 |
| CASC15 | rs57792403  | 21738640 | R,D | 0.4364 | 0.9838 | -0.063 | 0.082 | 0.6039 | 0.4371 |
| CASC15 | rs11438117  | 21660100 | R,I | 0.4211 | 0.4868 | -0.092 | 0.12  | 0.5936 | 0.441  |

|        |             |          |     |        |        |        |       |        |        |
|--------|-------------|----------|-----|--------|--------|--------|-------|--------|--------|
| CASC15 | rs36093392  | 21601725 | D,R | 0.7127 | 0.8142 | 0.075  | 0.097 | 0.5898 | 0.4425 |
| CASC15 | rs117538721 | 21647180 | T,C | 0.986  | 0.5245 | -0.369 | 0.483 | 0.5833 | 0.445  |
| CASC15 | rs6456440   | 21658236 | C,A | 0.9344 | 0.7776 | -0.128 | 0.167 | 0.5822 | 0.4455 |
| CASC15 | rs4712626   | 21701841 | G,A | 0.6545 | 0.8328 | 0.073  | 0.096 | 0.5812 | 0.4458 |
| CASC15 | rs9466158   | 21717309 | T,C | 0.7892 | 0.921  | 0.079  | 0.104 | 0.5764 | 0.4477 |
| CASC15 | rs7739186   | 21657833 | T,C | 0.9158 | 0.8085 | -0.118 | 0.156 | 0.574  | 0.4487 |
| CASC15 | rs78265086  | 21720541 | T,C | 0.9826 | 0.8636 | 0.223  | 0.294 | 0.5736 | 0.4488 |
| CASC15 | rs116187696 | 21639646 | G,A | 0.9868 | 0.5351 | -0.367 | 0.485 | 0.5725 | 0.4493 |
| CASC15 | rs141900910 | 21647244 | C,T | 0.9864 | 0.543  | -0.364 | 0.482 | 0.5691 | 0.4506 |
| CASC15 | rs9358450   | 21740882 | A,G | 0.746  | 0.858  | 0.074  | 0.098 | 0.5674 | 0.4513 |
| CASC15 | rs111928481 | 21648542 | T,A | 0.9738 | 0.8848 | -0.198 | 0.265 | 0.5593 | 0.4545 |
| CASC15 | rs34197291  | 21611277 | R,D | 0.7729 | 0.7368 | -0.088 | 0.117 | 0.5588 | 0.4547 |
| CASC15 | rs4712623   | 21688978 | C,T | 0.638  | 0.848  | 0.067  | 0.09  | 0.552  | 0.4575 |
| CASC15 | rs111442391 | 21730723 | C,T | 0.9726 | 0.3086 | 0.321  | 0.433 | 0.5483 | 0.459  |
| CASC15 | rs112395953 | 21727909 | A,C | 0.885  | 0.9741 | -0.094 | 0.127 | 0.5391 | 0.4628 |
| CASC15 | rs111404042 | 21565201 | G,A | 0.9548 | 0.5207 | -0.196 | 0.267 | 0.5385 | 0.4631 |
| CASC15 | rs113989215 | 21665766 | A,C | 0.9131 | 0.855  | -0.105 | 0.143 | 0.5344 | 0.4648 |
| CASC15 | rs1744865   | 21631078 | A,C | 0.6628 | 0.9515 | 0.066  | 0.09  | 0.5337 | 0.4651 |
| CASC15 | rs6456438   | 21632215 | G,A | 0.7029 | 0.9547 | 0.068  | 0.093 | 0.5331 | 0.4653 |
| CASC15 | rs117061311 | 21683546 | G,A | 0.9853 | 0.4203 | -0.367 | 0.505 | 0.5258 | 0.4684 |
| CASC15 | rs7740486   | 21714797 | A,G | 0.9818 | 0.8978 | 0.208  | 0.287 | 0.5246 | 0.4689 |
| CASC15 | rs7741780   | 21685460 | A,G | 0.8336 | 0.732  | 0.091  | 0.127 | 0.5111 | 0.4747 |
| CASC15 | rs60336041  | 21714991 | A,C | 0.9818 | 0.9007 | 0.204  | 0.287 | 0.5081 | 0.4759 |
| CASC15 | rs149768565 | 21719941 | R,D | 0.9754 | 0.6872 | 0.203  | 0.284 | 0.5073 | 0.4763 |
| CASC15 | rs9466154   | 21706155 | G,T | 0.6423 | 0.8816 | 0.065  | 0.092 | 0.5058 | 0.477  |
| CASC15 | rs571708107 | 21634038 | D,R | 0.6795 | 0.8686 | 0.067  | 0.095 | 0.499  | 0.48   |
| CASC15 | rs111482236 | 21588455 | T,C | 0.9537 | 0.6111 | -0.179 | 0.253 | 0.4989 | 0.48   |
| CASC15 | rs200822534 | 21701029 | R,D | 0.6386 | 0.6957 | 0.074  | 0.105 | 0.4919 | 0.4831 |
| CASC15 | rs73378032  | 21744446 | C,A | 0.9796 | 0.3201 | 0.311  | 0.447 | 0.4844 | 0.4864 |
| CASC15 | rs112524196 | 21743604 | G,A | 0.9794 | 0.3214 | 0.309  | 0.445 | 0.4815 | 0.4877 |
| CASC15 | rs11327351  | 21623643 | D,R | 0.6711 | 0.9267 | 0.063  | 0.092 | 0.4703 | 0.4928 |
| CASC15 | rs9358442   | 21573637 | G,A | 0.7034 | 0.4581 | -0.089 | 0.132 | 0.4603 | 0.4975 |
| CASC15 | rs1740854   | 21680732 | A,C | 0.6112 | 0.9639 | 0.06   | 0.089 | 0.4589 | 0.4981 |
| CASC15 | rs6925119   | 21701083 | G,A | 0.6412 | 0.822  | 0.064  | 0.095 | 0.4588 | 0.4982 |
| CASC15 | rs1744857   | 21626067 | T,C | 0.6993 | 0.9886 | 0.061  | 0.09  | 0.4586 | 0.4983 |
| CASC15 | rs9368333   | 21743631 | A,C | 0.9748 | 0.5254 | -0.202 | 0.299 | 0.4554 | 0.4998 |
| CASC15 | rs1740868   | 21660205 | G,T | 0.6798 | 0.8487 | 0.063  | 0.094 | 0.4541 | 0.5004 |
| CASC15 | rs1744862   | 21629881 | C,A | 0.6612 | 0.9531 | 0.06   | 0.089 | 0.4538 | 0.5006 |
| CASC15 | rs1744863   | 21629887 | A,G | 0.6612 | 0.9532 | 0.06   | 0.089 | 0.4537 | 0.5006 |
| CASC15 | rs7739607   | 21632345 | G,C | 0.6821 | 0.9067 | 0.064  | 0.095 | 0.453  | 0.5009 |
| CASC15 | rs840985    | 21744508 | G,A | 0.5605 | 0.3093 | -0.097 | 0.143 | 0.4531 | 0.5009 |
| CASC15 | rs1744860   | 21627046 | A,G | 0.6998 | 0.9875 | 0.061  | 0.091 | 0.4504 | 0.5022 |
| CASC15 | rs1744850   | 21618916 | G,T | 0.7128 | 0.9828 | 0.061  | 0.091 | 0.4492 | 0.5027 |
| CASC15 | rs7742225   | 21685474 | G,A | 0.827  | 0.7132 | 0.086  | 0.128 | 0.4487 | 0.5029 |
| CASC15 | rs9460660   | 21709294 | T,C | 0.616  | 0.9365 | 0.058  | 0.087 | 0.4458 | 0.5043 |

|        |             |          |     |        |        |        |       |        |        |
|--------|-------------|----------|-----|--------|--------|--------|-------|--------|--------|
| CASC15 | rs4327678   | 21619771 | T,C | 0.7132 | 0.9834 | 0.061  | 0.091 | 0.4455 | 0.5045 |
| CASC15 | rs138585583 | 21678890 | R,D | 0.8749 | 0.9014 | -0.077 | 0.115 | 0.4445 | 0.505  |
| CASC15 | rs11284636  | 21591706 | R,D | 0.9858 | 0.4225 | -0.33  | 0.496 | 0.4441 | 0.5052 |
| CASC15 | rs111232506 | 21744922 | C,T | 0.9798 | 0.3015 | 0.306  | 0.462 | 0.4385 | 0.5078 |
| CASC15 | rs150766348 | 21706424 | R,D | 0.6681 | 0.8073 | 0.065  | 0.098 | 0.4345 | 0.5098 |
| CASC15 | rs116300465 | 21738509 | T,G | 0.8638 | 0.9326 | -0.081 | 0.123 | 0.4345 | 0.5098 |
| CASC15 | rs1744864   | 21630684 | C,T | 0.7008 | 1      | 0.059  | 0.09  | 0.4261 | 0.5139 |
| CASC15 | rs201884896 | 21657694 | D,R | 0.9455 | 0.3238 | 0.217  | 0.336 | 0.4173 | 0.5183 |
| CASC15 | rs141898580 | 21709985 | C,T | 0.9816 | 0.8379 | 0.188  | 0.292 | 0.4163 | 0.5188 |
| CASC15 | rs6924745   | 21693837 | C,T | 0.8421 | 0.8514 | 0.08   | 0.124 | 0.4156 | 0.5191 |
| CASC15 | rs2749684   | 21676485 | C,T | 0.6168 | 0.9872 | 0.056  | 0.087 | 0.412  | 0.5209 |
| CASC15 | rs57761609  | 21683420 | D,R | 0.6127 | 0.8292 | 0.061  | 0.095 | 0.4077 | 0.5232 |
| CASC15 | rs12664833  | 21614978 | T,G | 0.8033 | 0.9552 | -0.067 | 0.106 | 0.404  | 0.5251 |
| CASC15 | rs116598598 | 21654884 | A,T | 0.983  | 0.5411 | -0.265 | 0.422 | 0.3929 | 0.5308 |
| CASC15 | rs7759495   | 21706044 | G,A | 0.6142 | 0.9046 | 0.055  | 0.088 | 0.3854 | 0.5347 |
| CASC15 | rs9366406   | 21617668 | T,A | 0.7397 | 0.9296 | -0.059 | 0.095 | 0.383  | 0.536  |
| CASC15 | rs1740850   | 21618925 | C,G | 0.7147 | 0.9839 | 0.056  | 0.091 | 0.3796 | 0.5378 |
| CASC15 | rs1744851   | 21619810 | T,C | 0.7153 | 0.9819 | 0.056  | 0.091 | 0.3784 | 0.5385 |
| CASC15 | rs74831068  | 21693978 | T,C | 0.8189 | 0.778  | -0.074 | 0.121 | 0.3724 | 0.5417 |
| CASC15 | rs571632729 | 21726382 | R,I | 0.896  | 0.3926 | -0.128 | 0.211 | 0.3709 | 0.5425 |
| CASC15 | rs9466159   | 21721313 | A,G | 0.8227 | 0.9323 | 0.071  | 0.118 | 0.3678 | 0.5442 |
| CASC15 | rs59759742  | 21707319 | T,G | 0.6009 | 0.9285 | 0.051  | 0.085 | 0.365  | 0.5457 |
| CASC15 | rs1744849   | 21612949 | A,G | 0.7238 | 1      | 0.055  | 0.092 | 0.3626 | 0.547  |
| CASC15 | rs1740851   | 21616268 | T,C | 0.7152 | 0.9852 | 0.055  | 0.091 | 0.36   | 0.5485 |
| CASC15 | rs7739585   | 21632295 | A,C | 0.6764 | 0.9279 | 0.056  | 0.093 | 0.3595 | 0.5488 |
| CASC15 | rs7773111   | 21696531 | G,A | 0.6146 | 0.751  | 0.058  | 0.097 | 0.3585 | 0.5494 |
| CASC15 | rs35829440  | 21655243 | R,I | 0.602  | 0.3134 | -0.091 | 0.152 | 0.3564 | 0.5505 |
| CASC15 | rs369470901 | 21707320 | R,I | 0.6014 | 0.9269 | 0.051  | 0.085 | 0.3563 | 0.5506 |
| CASC15 | rs189742413 | 21683505 | C,T | 0.984  | 0.4632 | -0.237 | 0.399 | 0.3513 | 0.5534 |
| CASC15 | rs112039884 | 21729100 | C,T | 0.9274 | 0.9676 | 0.096  | 0.163 | 0.3479 | 0.5553 |
| CASC15 | rs116443937 | 21600982 | A,T | 0.9889 | 0.6106 | -0.281 | 0.478 | 0.3456 | 0.5566 |
| CASC15 | rs1740840   | 21627378 | G,A | 0.7156 | 0.9808 | 0.054  | 0.092 | 0.3448 | 0.5571 |
| CASC15 | rs4712625   | 21699342 | G,A | 0.8761 | 0.9937 | 0.074  | 0.127 | 0.3391 | 0.5604 |
| CASC15 | rs1744889   | 21676795 | A,G | 0.6165 | 0.9936 | 0.05   | 0.087 | 0.337  | 0.5616 |
| CASC15 | rs6456437   | 21615443 | T,C | 0.7388 | 0.9506 | -0.054 | 0.094 | 0.333  | 0.5639 |
| CASC15 | rs79846403  | 21723244 | C,T | 0.8348 | 0.8403 | 0.072  | 0.126 | 0.3267 | 0.5676 |
| CASC15 | rs118074543 | 21601297 | C,G | 0.9891 | 0.6166 | -0.273 | 0.479 | 0.3253 | 0.5684 |
| CASC15 | rs115252874 | 21601345 | A,C | 0.9891 | 0.6163 | -0.272 | 0.48  | 0.3226 | 0.57   |
| CASC15 | rs4712631   | 21710896 | C,T | 0.586  | 0.9993 | 0.046  | 0.081 | 0.3208 | 0.5711 |
| CASC15 | rs79753782  | 21594201 | C,A | 0.9506 | 0.6778 | -0.13  | 0.233 | 0.3097 | 0.5778 |
| CASC15 | rs9358441   | 21565339 | T,C | 0.7025 | 0.3571 | -0.079 | 0.142 | 0.3066 | 0.5798 |
| CASC15 | rs9466145   | 21677060 | A,C | 0.6171 | 1      | 0.048  | 0.086 | 0.3051 | 0.5807 |
| CASC15 | rs9460668   | 21727929 | C,G | 0.8216 | 0.9705 | 0.063  | 0.114 | 0.3042 | 0.5812 |
| CASC15 | rs16885175  | 21726770 | A,G | 0.8585 | 0.8892 | -0.068 | 0.123 | 0.304  | 0.5814 |
| CASC15 | rs11330136  | 21629471 | D,R | 0.7    | 0.9778 | 0.05   | 0.091 | 0.3036 | 0.5816 |

|        |             |          |     |        |        |        |       |        |        |
|--------|-------------|----------|-----|--------|--------|--------|-------|--------|--------|
| CASC15 | rs9466153   | 21700048 | C,T | 0.9445 | 0.5887 | -0.11  | 0.2   | 0.301  | 0.5832 |
| CASC15 | rs79949484  | 21728966 | G,A | 0.9319 | 0.8819 | 0.096  | 0.176 | 0.2985 | 0.5848 |
| CASC15 | rs73374447  | 21636151 | C,T | 0.9753 | 0.3    | 0.24   | 0.441 | 0.2966 | 0.586  |
| CASC15 | rs1740839   | 21629928 | G,A | 0.7114 | 0.9827 | 0.05   | 0.092 | 0.2952 | 0.5869 |
| CASC15 | rs9366408   | 21742607 | G,A | 0.9822 | 0.9856 | -0.14  | 0.258 | 0.2937 | 0.5878 |
| CASC15 | rs57690989  | 21652353 | T,G | 0.9629 | 0.903  | -0.111 | 0.206 | 0.2918 | 0.589  |
| CASC15 | rs140423760 | 21646093 | C,A | 0.9884 | 0.552  | -0.272 | 0.505 | 0.2909 | 0.5896 |
| CASC15 | rs78529444  | 21722481 | A,G | 0.9876 | 0.8222 | -0.221 | 0.411 | 0.2892 | 0.5907 |
| CASC15 | rs115731554 | 21723090 | C,T | 0.9877 | 0.8291 | -0.218 | 0.41  | 0.2814 | 0.5958 |
| CASC15 | rs183503583 | 21638847 | G,A | 0.9885 | 0.5492 | -0.268 | 0.507 | 0.2789 | 0.5974 |
| CASC15 | rs35578300  | 21741886 | R,D | 0.7077 | 0.8309 | 0.05   | 0.096 | 0.2746 | 0.6003 |
| CASC15 | rs111357910 | 21723888 | A,G | 0.988  | 0.8511 | -0.214 | 0.41  | 0.2732 | 0.6012 |
| CASC15 | rs6456442   | 21698279 | T,C | 0.5821 | 0.821  | 0.046  | 0.09  | 0.2655 | 0.6064 |
| CASC15 | rs116342166 | 21630548 | T,C | 0.9891 | 0.5558 | -0.263 | 0.511 | 0.2646 | 0.607  |
| CASC15 | rs115733488 | 21695961 | T,C | 0.9892 | 0.5305 | -0.215 | 0.419 | 0.2642 | 0.6072 |
| CASC15 | rs73392015  | 21591766 | C,T | 0.9671 | 0.4088 | -0.187 | 0.371 | 0.2557 | 0.6131 |
| CASC15 | rs75994264  | 21745903 | C,T | 0.9868 | 0.3369 | 0.288  | 0.571 | 0.2546 | 0.6138 |
| CASC15 | rs9466164   | 21723538 | A,G | 0.8284 | 0.9494 | 0.059  | 0.118 | 0.2545 | 0.6139 |
| CASC15 | rs146017644 | 21640727 | C,T | 0.9833 | 0.5529 | -0.217 | 0.43  | 0.2541 | 0.6142 |
| CASC15 | rs7772337   | 21726278 | C,T | 0.8256 | 0.9612 | 0.058  | 0.116 | 0.2532 | 0.6148 |
| CASC15 | rs60368679  | 21746134 | C,T | 0.9868 | 0.3206 | 0.293  | 0.584 | 0.2516 | 0.616  |
| CASC15 | rs36024930  | 21605537 | R,D | 0.7795 | 0.8154 | -0.055 | 0.11  | 0.2473 | 0.619  |
| CASC15 | rs199690993 | 21646009 | R,D | 0.9762 | 0.3058 | 0.221  | 0.445 | 0.2461 | 0.6198 |
| CASC15 | rs145960980 | 21729330 | D,R | 0.4093 | 0.9758 | -0.041 | 0.083 | 0.2435 | 0.6217 |
| CASC15 | rs112837708 | 21696451 | G,A | 0.9648 | 0.4436 | -0.14  | 0.286 | 0.2406 | 0.6238 |
| CASC15 | rs9348480   | 21617782 | G,A | 0.7922 | 0.9408 | -0.05  | 0.102 | 0.2398 | 0.6244 |
| CASC15 | rs4712620   | 21554898 | A,C | 0.6509 | 0.3847 | -0.064 | 0.13  | 0.2376 | 0.6259 |
| CASC15 | rs78502915  | 21591248 | G,T | 0.9567 | 0.6759 | -0.119 | 0.245 | 0.2372 | 0.6262 |
| CASC15 | rs35001920  | 21676726 | R,D | 0.4775 | 0.9497 | -0.044 | 0.091 | 0.236  | 0.6271 |
| CASC15 | rs79232286  | 21689146 | G,A | 0.8483 | 0.7428 | -0.065 | 0.133 | 0.2347 | 0.6281 |
| CASC15 | rs113932195 | 21562740 | T,C | 0.9088 | 0.469  | -0.087 | 0.181 | 0.232  | 0.63   |
| CASC15 | rs62403977  | 21725337 | C,T | 0.8232 | 0.9705 | 0.055  | 0.115 | 0.2307 | 0.631  |
| CASC15 | rs145952396 | 21677173 | C,T | 0.9854 | 0.5637 | -0.209 | 0.437 | 0.2274 | 0.6335 |
| CASC15 | rs7740142   | 21609635 | G,A | 0.9809 | 0.955  | -0.143 | 0.301 | 0.2261 | 0.6344 |
| CASC15 | rs1407655   | 21727902 | G,A | 0.4028 | 0.9882 | -0.039 | 0.083 | 0.2253 | 0.635  |
| CASC15 | rs7746424   | 21685920 | C,T | 0.9762 | 0.4981 | -0.179 | 0.377 | 0.2251 | 0.6352 |
| CASC15 | rs9460666   | 21726380 | G,A | 0.9296 | 0.3512 | -0.122 | 0.258 | 0.2233 | 0.6365 |
| CASC15 | rs7746292   | 21685907 | A,G | 0.9762 | 0.4817 | -0.181 | 0.383 | 0.2225 | 0.6371 |
| CASC15 | rs111479343 | 21561070 | G,T | 0.9092 | 0.4694 | -0.086 | 0.182 | 0.2216 | 0.6378 |
| CASC15 | rs1830667   | 21728089 | G,T | 0.4027 | 0.9868 | -0.039 | 0.083 | 0.2193 | 0.6396 |
| CASC15 | rs9466156   | 21711491 | C,T | 0.5874 | 0.9998 | 0.038  | 0.081 | 0.2184 | 0.6403 |
| CASC15 | rs111684701 | 21608562 | C,T | 0.9809 | 0.9509 | -0.141 | 0.302 | 0.2178 | 0.6407 |
| CASC15 | rs149555362 | 21726144 | T,C | 0.9879 | 0.8456 | -0.189 | 0.409 | 0.213  | 0.6444 |
| CASC15 | rs10636012  | 21727515 | I,R | 0.4062 | 0.9929 | -0.038 | 0.083 | 0.2128 | 0.6446 |
| CASC15 | rs2180419   | 21728317 | A,G | 0.4028 | 0.9843 | -0.038 | 0.083 | 0.2117 | 0.6455 |



|        |             |          |     |        |        |        |       |        |        |
|--------|-------------|----------|-----|--------|--------|--------|-------|--------|--------|
| CASC15 | rs9466136   | 21653258 | C,T | 0.905  | 0.8569 | -0.063 | 0.138 | 0.2109 | 0.6461 |
| CASC15 | rs571788443 | 21558875 | R,D | 0.8581 | 0.3304 | -0.079 | 0.173 | 0.2098 | 0.6469 |
| CASC15 | rs112892524 | 21608321 | C,T | 0.981  | 0.9464 | -0.138 | 0.302 | 0.209  | 0.6476 |
| CASC15 | rs116239840 | 21722970 | A,C | 0.8218 | 0.9134 | 0.053  | 0.116 | 0.2077 | 0.6486 |
| CASC15 | rs75062640  | 21722533 | A,G | 0.9823 | 0.8162 | 0.151  | 0.335 | 0.2037 | 0.6518 |
| CASC15 | rs1744887   | 21674378 | G,T | 0.9679 | 0.3275 | -0.172 | 0.382 | 0.2028 | 0.6525 |
| CASC15 | rs116258702 | 21618081 | C,T | 0.9891 | 0.5647 | -0.224 | 0.503 | 0.1989 | 0.6556 |
| CASC15 | rs75327712  | 21728829 | G,A | 0.9295 | 0.9778 | 0.073  | 0.165 | 0.1959 | 0.658  |
| CASC15 | rs73376077  | 21720504 | C,T | 0.7969 | 0.9025 | 0.049  | 0.11  | 0.1953 | 0.6586 |
| CASC15 | rs7746895   | 21686168 | C,A | 0.9752 | 0.5028 | -0.162 | 0.368 | 0.1934 | 0.6601 |
| CASC15 | rs7747757   | 21686714 | C,T | 0.9752 | 0.5035 | -0.161 | 0.367 | 0.1919 | 0.6614 |
| CASC15 | rs115180462 | 21686653 | G,C | 0.9752 | 0.5032 | -0.161 | 0.367 | 0.1914 | 0.6617 |
| CASC15 | rs78278852  | 21688571 | G,A | 0.9753 | 0.5113 | -0.16  | 0.365 | 0.1911 | 0.662  |
| CASC15 | rs7746432   | 21685933 | C,T | 0.9755 | 0.5041 | -0.161 | 0.369 | 0.1911 | 0.662  |
| CASC15 | rs7772258   | 21686985 | T,C | 0.8466 | 0.7118 | -0.059 | 0.136 | 0.1908 | 0.6623 |
| CASC15 | rs142460847 | 21687632 | A,G | 0.9751 | 0.5044 | -0.16  | 0.366 | 0.1907 | 0.6623 |
| CASC15 | rs9350367   | 21555608 | C,T | 0.6563 | 0.3839 | -0.058 | 0.132 | 0.1907 | 0.6624 |
| CASC15 | rs35922627  | 21667988 | A,T | 0.973  | 0.7238 | -0.128 | 0.294 | 0.1902 | 0.6628 |
| CASC15 | rs4710982   | 21733835 | G,C | 0.8653 | 0.9343 | -0.053 | 0.123 | 0.1896 | 0.6632 |
| CASC15 | rs9350368   | 21562144 | A,G | 0.6823 | 0.3726 | -0.059 | 0.135 | 0.1895 | 0.6634 |
| CASC15 | rs71563994  | 21668435 | T,C | 0.9731 | 0.7255 | -0.128 | 0.294 | 0.1894 | 0.6634 |
| CASC15 | rs78686872  | 21566786 | T,C | 0.9087 | 0.4686 | -0.079 | 0.181 | 0.1893 | 0.6635 |
| CASC15 | rs78225455  | 21566785 | T,A | 0.9087 | 0.4686 | -0.079 | 0.181 | 0.189  | 0.6638 |
| CASC15 | rs148767257 | 21687606 | C,T | 0.9752 | 0.5064 | -0.159 | 0.366 | 0.1889 | 0.6638 |
| CASC15 | rs13220312  | 21671856 | A,G | 0.9734 | 0.7398 | -0.126 | 0.293 | 0.1862 | 0.6661 |
| CASC15 | rs35210528  | 21667781 | T,C | 0.9732 | 0.7254 | -0.127 | 0.295 | 0.1845 | 0.6675 |
| CASC15 | rs116216476 | 21700308 | T,C | 0.9886 | 0.6467 | -0.186 | 0.434 | 0.1834 | 0.6684 |
| CASC15 | rs545611803 | 21688770 | R,I | 0.8158 | 0.533  | -0.061 | 0.143 | 0.1833 | 0.6685 |
| CASC15 | rs66647983  | 21633079 | R,D | 0.5368 | 0.3749 | -0.057 | 0.134 | 0.1824 | 0.6693 |
| CASC15 | rs147045541 | 21675767 | C,T | 0.9834 | 0.576  | -0.17  | 0.399 | 0.1815 | 0.6701 |
| CASC15 | rs146269383 | 21601263 | G,A | 0.9772 | 0.8168 | -0.138 | 0.327 | 0.1784 | 0.6727 |
| CASC15 | rs10946466  | 21727456 | C,A | 0.9298 | 0.9928 | 0.069  | 0.164 | 0.1782 | 0.673  |
| CASC15 | rs7772163   | 21726011 | G,C | 0.8088 | 0.9857 | 0.046  | 0.109 | 0.1777 | 0.6733 |
| CASC15 | rs76714354  | 21572464 | A,G | 0.9805 | 0.3806 | 0.189  | 0.449 | 0.1765 | 0.6744 |
| CASC15 | rs117396734 | 21615374 | A,T | 0.9894 | 0.5869 | -0.21  | 0.5   | 0.1765 | 0.6744 |
| CASC15 | rs1322883   | 21720796 | A,G | 0.5867 | 0.9164 | 0.035  | 0.084 | 0.176  | 0.6749 |
| CASC15 | rs7738506   | 21702690 | A,T | 0.9888 | 0.6716 | -0.18  | 0.432 | 0.1738 | 0.6767 |
| CASC15 | rs1740844   | 21622871 | C,T | 0.6724 | 0.9911 | 0.036  | 0.086 | 0.1736 | 0.6769 |
| CASC15 | rs7740084   | 21727531 | A,G | 0.4005 | 0.9983 | -0.035 | 0.083 | 0.1727 | 0.6777 |
| CASC15 | rs9460651   | 21622531 | G,T | 0.672  | 0.9951 | 0.036  | 0.086 | 0.1719 | 0.6784 |
| CASC15 | rs58919806  | 21570038 | G,A | 0.8921 | 0.397  | -0.076 | 0.184 | 0.1712 | 0.6791 |
| CASC15 | rs547687648 | 21729656 | R,I | 0.7892 | 0.8727 | -0.044 | 0.107 | 0.1709 | 0.6793 |
| CASC15 | rs528217121 | 21702677 | R,D | 0.9888 | 0.6785 | -0.178 | 0.431 | 0.1704 | 0.6797 |
| CASC15 | rs60309622  | 21698465 | C,T | 0.9414 | 0.5673 | -0.082 | 0.199 | 0.1701 | 0.68   |
| CASC15 | rs1740842   | 21623181 | G,A | 0.6726 | 0.9885 | 0.036  | 0.087 | 0.17   | 0.6801 |

|        |             |          |     |        |        |        |       |        |        |
|--------|-------------|----------|-----|--------|--------|--------|-------|--------|--------|
| CASC15 | rs7764209   | 21727755 | A,T | 0.4006 | 0.9953 | -0.034 | 0.083 | 0.1697 | 0.6804 |
| CASC15 | rs1744853   | 21623386 | A,G | 0.6725 | 0.9887 | 0.036  | 0.087 | 0.1697 | 0.6804 |
| CASC15 | rs1744854   | 21623686 | C,T | 0.6725 | 0.9882 | 0.036  | 0.087 | 0.1686 | 0.6814 |
| CASC15 | rs7744078   | 21727822 | G,C | 0.4006 | 0.9944 | -0.034 | 0.083 | 0.1681 | 0.6818 |
| CASC15 | rs11968460  | 21718604 | G,A | 0.8056 | 0.9024 | 0.046  | 0.113 | 0.1678 | 0.6821 |
| CASC15 | rs7775506   | 21729962 | C,T | 0.4216 | 0.9976 | -0.032 | 0.08  | 0.1658 | 0.6838 |
| CASC15 | rs80177376  | 21744978 | C,T | 0.9048 | 0.3545 | 0.094  | 0.232 | 0.1641 | 0.6854 |
| CASC15 | rs562901644 | 21554922 | R,D | 0.9157 | 0.7168 | -0.064 | 0.16  | 0.1612 | 0.6881 |
| CASC15 | rs9466163   | 21723532 | C,T | 0.809  | 0.9768 | 0.043  | 0.109 | 0.1569 | 0.692  |
| CASC15 | rs6928871   | 21697812 | T,C | 0.9391 | 0.571  | -0.077 | 0.194 | 0.1565 | 0.6924 |
| CASC15 | rs76144443  | 21697748 | A,G | 0.9391 | 0.5709 | -0.077 | 0.194 | 0.1565 | 0.6924 |
| CASC15 | rs6929045   | 21697861 | T,C | 0.9391 | 0.5712 | -0.076 | 0.194 | 0.156  | 0.6928 |
| CASC15 | rs115395409 | 21696639 | C,T | 0.99   | 0.5674 | -0.21  | 0.533 | 0.156  | 0.6929 |
| CASC15 | rs6906248   | 21697889 | A,G | 0.9391 | 0.5714 | -0.076 | 0.194 | 0.1558 | 0.693  |
| CASC15 | rs117804382 | 21656810 | C,T | 0.9855 | 0.5625 | -0.174 | 0.44  | 0.1558 | 0.693  |
| CASC15 | rs79847215  | 21560355 | C,A | 0.9848 | 0.3334 | 0.207  | 0.526 | 0.1549 | 0.6939 |
| CASC15 | rs6906888   | 21697966 | G,A | 0.9391 | 0.5729 | -0.076 | 0.193 | 0.153  | 0.6957 |
| CASC15 | rs9460665   | 21724144 | G,A | 0.8084 | 1      | 0.042  | 0.109 | 0.15   | 0.6985 |
| CASC15 | rs145825998 | 21695945 | T,G | 0.9899 | 0.5601 | -0.207 | 0.534 | 0.1499 | 0.6986 |
| CASC15 | rs150071402 | 21610552 | G,A | 0.9896 | 0.5952 | -0.194 | 0.502 | 0.1498 | 0.6987 |
| CASC15 | rs56004640  | 21716262 | A,G | 0.8113 | 0.9096 | 0.044  | 0.114 | 0.1483 | 0.7002 |
| CASC15 | rs74785728  | 21611723 | G,A | 0.9819 | 0.9332 | -0.121 | 0.315 | 0.148  | 0.7005 |
| CASC15 | rs9295516   | 21673560 | C,T | 0.9483 | 0.8605 | -0.069 | 0.179 | 0.1475 | 0.701  |
| CASC15 | rs185847252 | 21676018 | G,A | 0.9496 | 0.8487 | -0.07  | 0.182 | 0.147  | 0.7014 |
| CASC15 | rs117537289 | 21661595 | C,T | 0.9854 | 0.5671 | -0.166 | 0.436 | 0.1455 | 0.7029 |
| CASC15 | rs9460664   | 21723621 | G,A | 0.8102 | 0.9858 | 0.042  | 0.11  | 0.1452 | 0.7032 |
| CASC15 | rs6925679   | 21724480 | A,G | 0.8086 | 1      | 0.041  | 0.109 | 0.1441 | 0.7042 |
| CASC15 | rs140643662 | 21664544 | G,A | 0.9855 | 0.5752 | -0.165 | 0.434 | 0.144  | 0.7043 |
| CASC15 | rs9466165   | 21724322 | T,C | 0.8089 | 0.9953 | 0.041  | 0.109 | 0.1428 | 0.7056 |
| CASC15 | rs7772692   | 21696544 | A,G | 0.9472 | 0.5318 | -0.084 | 0.221 | 0.1427 | 0.7056 |
| CASC15 | rs138691949 | 21653247 | A,T | 0.9812 | 0.5466 | -0.15  | 0.398 | 0.1427 | 0.7056 |
| CASC15 | rs116878740 | 21665291 | A,G | 0.9855 | 0.5757 | -0.164 | 0.434 | 0.1427 | 0.7056 |
| CASC15 | rs1555529   | 21691704 | A,G | 0.7822 | 0.9942 | 0.037  | 0.1   | 0.1413 | 0.707  |
| CASC15 | rs6926491   | 21724670 | G,A | 0.8091 | 0.9926 | 0.041  | 0.109 | 0.1413 | 0.707  |
| CASC15 | rs76857610  | 21685543 | G,T | 0.9888 | 0.4734 | -0.206 | 0.549 | 0.1408 | 0.7075 |
| CASC15 | rs12189901  | 21726940 | G,A | 0.9308 | 0.9638 | 0.062  | 0.168 | 0.1391 | 0.7092 |
| CASC15 | rs12528487  | 21735354 | A,G | 0.8629 | 0.9338 | -0.045 | 0.122 | 0.1368 | 0.7115 |
| CASC15 | rs7754702   | 21696403 | T,C | 0.9482 | 0.5267 | -0.083 | 0.226 | 0.1367 | 0.7116 |
| CASC15 | rs4712624   | 21693152 | A,G | 0.843  | 0.7383 | -0.048 | 0.131 | 0.136  | 0.7123 |
| CASC15 | rs76934110  | 21669629 | G,A | 0.9626 | 0.7982 | -0.095 | 0.259 | 0.1348 | 0.7135 |
| CASC15 | rs6929294   | 21698041 | T,G | 0.9394 | 0.5831 | -0.07  | 0.192 | 0.1339 | 0.7144 |
| CASC15 | rs6929483   | 21698094 | T,C | 0.9394 | 0.583  | -0.07  | 0.192 | 0.1325 | 0.7158 |
| CASC15 | rs73737558  | 21577723 | A,G | 0.9837 | 0.4293 | 0.169  | 0.463 | 0.1326 | 0.7158 |
| CASC15 | rs113064891 | 21606092 | R,I | 0.9811 | 0.9369 | -0.11  | 0.304 | 0.131  | 0.7174 |
| CASC15 | rs7753451   | 21607833 | T,C | 0.9894 | 0.606  | -0.177 | 0.491 | 0.1298 | 0.7187 |

|        |             |          |     |        |        |        |       |        |        |
|--------|-------------|----------|-----|--------|--------|--------|-------|--------|--------|
| CASC15 | rs79684204  | 21687368 | A,C | 0.9748 | 0.5098 | -0.13  | 0.361 | 0.1291 | 0.7193 |
| CASC15 | rs147795739 | 21606396 | C,G | 0.9894 | 0.6082 | -0.175 | 0.49  | 0.1274 | 0.7212 |
| CASC15 | rs7770799   | 21553258 | A,C | 0.9337 | 0.9722 | -0.056 | 0.157 | 0.1265 | 0.722  |
| CASC15 | rs9460658   | 21684193 | C,T | 0.9792 | 0.347  | 0.177  | 0.497 | 0.1263 | 0.7223 |
| CASC15 | rs1853345   | 21742346 | T,C | 0.73   | 0.9808 | 0.031  | 0.088 | 0.1257 | 0.7229 |
| CASC15 | rs150345835 | 21568080 | R,D | 0.983  | 0.3784 | 0.171  | 0.483 | 0.1253 | 0.7234 |
| CASC15 | rs58699714  | 21698897 | C,T | 0.9395 | 0.5888 | -0.068 | 0.192 | 0.1251 | 0.7236 |
| CASC15 | rs112047759 | 21699028 | T,C | 0.9395 | 0.5892 | -0.068 | 0.192 | 0.125  | 0.7237 |
| CASC15 | rs112103466 | 21699063 | T,C | 0.9395 | 0.5894 | -0.068 | 0.192 | 0.1246 | 0.7241 |
| CASC15 | rs7755254   | 21699892 | C,T | 0.9389 | 0.6037 | -0.067 | 0.189 | 0.1241 | 0.7246 |
| CASC15 | rs56175726  | 21566498 | G,A | 0.9534 | 0.3503 | 0.111  | 0.316 | 0.1239 | 0.7248 |
| CASC15 | rs1740865   | 21668071 | C,A | 0.5314 | 0.8949 | -0.033 | 0.093 | 0.1237 | 0.725  |
| CASC15 | rs7775517   | 21699901 | T,G | 0.9389 | 0.6039 | -0.066 | 0.189 | 0.1236 | 0.7251 |
| CASC15 | rs35857450  | 21622415 | D,R | 0.6703 | 0.8902 | 0.032  | 0.091 | 0.1229 | 0.7259 |
| CASC15 | rs7751661   | 21621850 | G,A | 0.6705 | 1      | 0.03   | 0.085 | 0.1218 | 0.7271 |
| CASC15 | rs117971178 | 21674146 | C,T | 0.9852 | 0.5427 | -0.152 | 0.438 | 0.1211 | 0.7278 |
| CASC15 | rs149455365 | 21553549 | R,D | 0.9357 | 0.9431 | -0.056 | 0.16  | 0.1208 | 0.7282 |
| CASC15 | rs78098947  | 21713740 | C,T | 0.989  | 0.7788 | -0.144 | 0.417 | 0.1186 | 0.7305 |
| CASC15 | rs111526226 | 21567385 | T,C | 0.968  | 0.4673 | 0.107  | 0.311 | 0.1185 | 0.7307 |
| CASC15 | rs1744886   | 21671092 | A,T | 0.5151 | 0.9725 | -0.031 | 0.09  | 0.1165 | 0.7328 |
| CASC15 | rs72317305  | 21669872 | R,D | 0.5156 | 0.9662 | -0.031 | 0.09  | 0.1165 | 0.7329 |
| CASC15 | rs113815998 | 21709365 | G,T | 0.9608 | 0.7324 | -0.077 | 0.227 | 0.1161 | 0.7334 |
| CASC15 | rs67418443  | 21554442 | C,T | 0.9266 | 0.876  | -0.052 | 0.153 | 0.1152 | 0.7343 |
| CASC15 | rs146516474 | 21554348 | C,T | 0.9266 | 0.8769 | -0.052 | 0.153 | 0.1151 | 0.7344 |
| CASC15 | rs58572340  | 21555505 | T,A | 0.8729 | 0.5846 | -0.048 | 0.141 | 0.1135 | 0.7362 |
| CASC15 | rs147960757 | 21606492 | G,T | 0.9772 | 0.8203 | -0.11  | 0.327 | 0.1134 | 0.7364 |
| CASC15 | rs2876599   | 21714103 | C,G | 0.9889 | 0.7808 | -0.139 | 0.416 | 0.1117 | 0.7383 |
| CASC15 | rs74926222  | 21568994 | C,T | 0.9816 | 0.3776 | 0.154  | 0.464 | 0.1111 | 0.7389 |
| CASC15 | rs73392011  | 21569756 | C,T | 0.9671 | 0.445  | 0.104  | 0.314 | 0.1099 | 0.7402 |
| CASC15 | rs141765572 | 21679089 | G,T | 0.9877 | 0.5484 | 0.177  | 0.533 | 0.1096 | 0.7406 |
| CASC15 | rs79381952  | 21699489 | T,C | 0.9398 | 0.6026 | -0.063 | 0.19  | 0.1093 | 0.7409 |
| CASC15 | rs76428292  | 21629756 | C,A | 0.974  | 0.7112 | -0.108 | 0.327 | 0.1094 | 0.7409 |
| CASC15 | rs2328627   | 21714362 | G,A | 0.9889 | 0.782  | -0.136 | 0.416 | 0.1067 | 0.7439 |
| CASC15 | rs561391795 | 21725044 | R,D | 0.9346 | 0.4431 | -0.074 | 0.228 | 0.1065 | 0.7442 |
| CASC15 | rs7754895   | 21696533 | T,C | 0.9459 | 0.5325 | -0.071 | 0.218 | 0.1052 | 0.7456 |
| CASC15 | rs78030412  | 21631511 | T,C | 0.9731 | 0.7032 | -0.104 | 0.323 | 0.1042 | 0.7468 |
| CASC15 | rs145907846 | 21729085 | G,A | 0.9868 | 0.8724 | -0.121 | 0.375 | 0.1032 | 0.748  |
| CASC15 | rs2181318   | 21691468 | T,C | 0.549  | 0.9168 | -0.027 | 0.085 | 0.1019 | 0.7495 |
| CASC15 | rs112101248 | 21683625 | T,C | 0.9893 | 0.5442 | 0.152  | 0.475 | 0.1018 | 0.7496 |
| CASC15 | rs78523587  | 21614133 | G,A | 0.9764 | 0.7872 | -0.104 | 0.329 | 0.1005 | 0.7512 |
| CASC15 | rs80309179  | 21644884 | G,T | 0.9894 | 0.4434 | 0.212  | 0.669 | 0.1005 | 0.7512 |
| CASC15 | rs73737565  | 21664442 | T,G | 0.9768 | 0.5564 | -0.109 | 0.345 | 0.1001 | 0.7517 |
| CASC15 | rs75629001  | 21689221 | C,T | 0.8716 | 0.708  | -0.045 | 0.145 | 0.0957 | 0.757  |
| CASC15 | rs76257188  | 21688091 | T,G | 0.8712 | 0.7018 | -0.045 | 0.145 | 0.0957 | 0.757  |
| CASC15 | rs9466141   | 21673993 | C,T | 0.9236 | 0.9976 | -0.045 | 0.144 | 0.0956 | 0.7572 |

|        |             |          |     |        |        |        |       |        |        |
|--------|-------------|----------|-----|--------|--------|--------|-------|--------|--------|
| CASC15 | rs1973987   | 21687659 | G,T | 0.8711 | 0.6956 | -0.045 | 0.146 | 0.0945 | 0.7586 |
| CASC15 | rs557872691 | 21603474 | R,D | 0.8825 | 0.5572 | -0.05  | 0.163 | 0.0939 | 0.7592 |
| CASC15 | rs200447839 | 21689115 | R,D | 0.8701 | 0.7188 | -0.043 | 0.143 | 0.0926 | 0.7609 |
| CASC15 | rs56050802  | 21555539 | C,T | 0.8664 | 0.6128 | -0.041 | 0.134 | 0.0912 | 0.7626 |
| CASC15 | rs9466124   | 21599700 | A,G | 0.9309 | 0.9964 | -0.048 | 0.161 | 0.0909 | 0.7631 |
| CASC15 | rs375807437 | 21686609 | R,D | 0.5634 | 0.7421 | -0.028 | 0.094 | 0.0903 | 0.7638 |
| CASC15 | rs9466161   | 21722916 | T,C | 0.7866 | 0.8907 | 0.031  | 0.102 | 0.0891 | 0.7654 |
| CASC15 | rs16885105  | 21598981 | C,T | 0.9309 | 0.9869 | -0.048 | 0.161 | 0.0889 | 0.7656 |
| CASC15 | rs9368326   | 21590104 | A,G | 0.8056 | 0.5535 | -0.041 | 0.139 | 0.0885 | 0.7661 |
| CASC15 | rs78712702  | 21700242 | T,A | 0.9843 | 0.4664 | 0.151  | 0.511 | 0.0876 | 0.7673 |
| CASC15 | rs1321253   | 21689813 | T,A | 0.8723 | 0.7273 | -0.042 | 0.143 | 0.0859 | 0.7694 |
| CASC15 | rs9466140   | 21673293 | A,G | 0.9286 | 0.9271 | -0.045 | 0.155 | 0.0854 | 0.7701 |
| CASC15 | rs11281983  | 21600430 | R,I | 0.9309 | 0.9934 | -0.047 | 0.161 | 0.0847 | 0.7711 |
| CASC15 | rs77992585  | 21687331 | G,A | 0.8724 | 0.6862 | -0.043 | 0.147 | 0.0844 | 0.7715 |
| CASC15 | rs12524788  | 21690518 | T,G | 0.8725 | 0.7375 | -0.041 | 0.142 | 0.0842 | 0.7717 |
| CASC15 | rs6921422   | 21600523 | C,A | 0.9308 | 0.9908 | -0.047 | 0.161 | 0.084  | 0.772  |
| CASC15 | rs75051132  | 21589799 | T,A | 0.98   | 0.6365 | -0.116 | 0.402 | 0.0832 | 0.7731 |
| CASC15 | rs75179770  | 21568397 | C,T | 0.9582 | 0.4017 | 0.089  | 0.31  | 0.083  | 0.7732 |
| CASC15 | rs71563995  | 21676342 | A,G | 0.9697 | 0.7188 | -0.081 | 0.284 | 0.082  | 0.7745 |
| CASC15 | rs9466168   | 21734750 | C,T | 0.8215 | 0.9954 | -0.031 | 0.109 | 0.0813 | 0.7755 |
| CASC15 | rs201995762 | 21706002 | R,I | 0.9873 | 0.4393 | -0.154 | 0.542 | 0.0804 | 0.7768 |
| CASC15 | rs1989470   | 21715067 | T,A | 0.5732 | 0.9562 | 0.023  | 0.082 | 0.0799 | 0.7774 |
| CASC15 | rs113889001 | 21695381 | A,C | 0.9496 | 0.5091 | -0.067 | 0.237 | 0.0797 | 0.7777 |
| CASC15 | rs9466128   | 21606679 | G,T | 0.3766 | 0.995  | -0.023 | 0.084 | 0.0755 | 0.7835 |
| CASC15 | rs60459153  | 21570941 | G,A | 0.9572 | 0.4198 | 0.082  | 0.3   | 0.0751 | 0.784  |
| CASC15 | rs1972212   | 21743761 | C,T | 0.8703 | 0.5142 | -0.048 | 0.178 | 0.0743 | 0.7851 |
| CASC15 | rs60048426  | 21556513 | G,A | 0.947  | 0.5576 | -0.058 | 0.214 | 0.0742 | 0.7853 |
| CASC15 | rs9466125   | 21601156 | A,G | 0.9295 | 0.9574 | -0.044 | 0.162 | 0.0741 | 0.7855 |
| CASC15 | rs1973986   | 21687571 | A,T | 0.5557 | 0.8895 | -0.023 | 0.086 | 0.0731 | 0.7869 |
| CASC15 | rs1740838   | 21632759 | G,T | 0.3851 | 0.7571 | -0.026 | 0.096 | 0.0727 | 0.7875 |
| CASC15 | rs61197304  | 21570213 | G,A | 0.9581 | 0.4232 | 0.081  | 0.302 | 0.0724 | 0.7879 |
| CASC15 | rs148775927 | 21677832 | C,G | 0.9884 | 0.5129 | 0.16   | 0.596 | 0.0716 | 0.7891 |
| CASC15 | rs548416728 | 21647978 | R,D | 0.9747 | 0.6618 | 0.082  | 0.309 | 0.0711 | 0.7898 |
| CASC15 | rs1740847   | 21620469 | C,A | 0.6882 | 0.9889 | 0.023  | 0.087 | 0.0705 | 0.7905 |
| CASC15 | rs149019701 | 21621670 | D,R | 0.6874 | 0.9939 | 0.023  | 0.087 | 0.07   | 0.7914 |
| CASC15 | rs1740848   | 21620293 | G,A | 0.6882 | 0.9886 | 0.023  | 0.087 | 0.07   | 0.7914 |
| CASC15 | rs111405274 | 21694954 | A,G | 0.9508 | 0.5151 | -0.064 | 0.241 | 0.0697 | 0.7917 |
| CASC15 | rs150435139 | 21707497 | A,G | 0.9874 | 0.4469 | -0.143 | 0.54  | 0.0697 | 0.7917 |
| CASC15 | rs12191413  | 21740465 | A,T | 0.7737 | 0.8456 | 0.028  | 0.106 | 0.0697 | 0.7918 |
| CASC15 | rs1740845   | 21621731 | G,A | 0.6871 | 0.9929 | 0.023  | 0.087 | 0.0694 | 0.7922 |
| CASC15 | rs1744852   | 21621724 | A,G | 0.6871 | 0.9927 | 0.023  | 0.087 | 0.0693 | 0.7924 |
| CASC15 | rs79337490  | 21695025 | T,C | 0.9508 | 0.5151 | -0.063 | 0.241 | 0.069  | 0.7927 |
| CASC15 | rs147268567 | 21621169 | D,R | 0.6874 | 0.993  | 0.023  | 0.087 | 0.0689 | 0.7929 |
| CASC15 | rs1740846   | 21621045 | A,G | 0.6874 | 0.9924 | 0.023  | 0.087 | 0.068  | 0.7943 |
| CASC15 | rs6925407   | 21724100 | G,C | 0.9884 | 0.9399 | -0.103 | 0.395 | 0.0679 | 0.7944 |

|        |             |          |     |        |        |        |       |        |        |
|--------|-------------|----------|-----|--------|--------|--------|-------|--------|--------|
| CASC15 | rs144222210 | 21726206 | C,T | 0.987  | 0.7975 | -0.105 | 0.405 | 0.0676 | 0.7948 |
| CASC15 | rs79002033  | 21706995 | C,T | 0.9739 | 0.6771 | -0.08  | 0.306 | 0.0674 | 0.7951 |
| CASC15 | rs9460669   | 21729251 | A,G | 0.4053 | 0.9459 | -0.022 | 0.085 | 0.0667 | 0.7962 |
| CASC15 | rs77155105  | 21682861 | C,G | 0.9671 | 0.7117 | -0.076 | 0.294 | 0.0663 | 0.7968 |
| CASC15 | rs1555287   | 21686091 | G,A | 0.5629 | 0.8575 | -0.022 | 0.088 | 0.0643 | 0.7998 |
| CASC15 | rs912025    | 21716058 | C,G | 0.8371 | 0.9358 | 0.028  | 0.111 | 0.0641 | 0.8001 |
| CASC15 | rs542285387 | 21621459 | I,R | 0.6862 | 0.9884 | 0.022  | 0.087 | 0.0634 | 0.8013 |
| CASC15 | rs9466127   | 21602745 | G,A | 0.9739 | 0.9906 | 0.06   | 0.24  | 0.063  | 0.8018 |
| CASC15 | rs9466169   | 21746181 | A,G | 0.8659 | 0.4166 | -0.048 | 0.195 | 0.0615 | 0.8041 |
| CASC15 | rs77708052  | 21605375 | C,T | 0.98   | 0.7948 | -0.089 | 0.36  | 0.061  | 0.805  |
| CASC15 | rs11965374  | 21629739 | T,G | 0.9653 | 0.7623 | -0.063 | 0.255 | 0.06   | 0.8065 |
| CASC15 | rs5874828   | 21692948 | R,D | 0.8716 | 0.725  | -0.034 | 0.142 | 0.0584 | 0.8091 |
| CASC15 | rs13211544  | 21619214 | C,A | 0.8478 | 0.3133 | -0.048 | 0.198 | 0.0578 | 0.8099 |
| CASC15 | rs75509154  | 21670162 | A,G | 0.9656 | 0.8408 | -0.062 | 0.261 | 0.0566 | 0.812  |
| CASC15 | rs116016141 | 21687920 | C,T | 0.988  | 0.5009 | -0.123 | 0.523 | 0.055  | 0.8146 |
| CASC15 | rs1744856   | 21625895 | G,A | 0.6341 | 0.4717 | 0.029  | 0.126 | 0.0542 | 0.8159 |
| CASC15 | rs76062205  | 21666427 | C,T | 0.9438 | 0.7852 | -0.046 | 0.199 | 0.0528 | 0.8182 |
| CASC15 | rs7746995   | 21686064 | G,A | 0.9859 | 0.4629 | -0.115 | 0.502 | 0.0529 | 0.8182 |
| CASC15 | rs80035391  | 21685357 | G,A | 0.8973 | 0.5163 | -0.042 | 0.183 | 0.0517 | 0.8201 |
| CASC15 | rs116697959 | 21668594 | A,T | 0.9652 | 0.8312 | -0.059 | 0.261 | 0.0517 | 0.8202 |
| CASC15 | rs147488932 | 21672276 | G,A | 0.9657 | 0.8442 | -0.059 | 0.261 | 0.0517 | 0.8202 |
| CASC15 | rs80264536  | 21666345 | T,G | 0.9437 | 0.7836 | -0.045 | 0.198 | 0.0515 | 0.8205 |
| CASC15 | rs16885205  | 21743291 | T,C | 0.8644 | 0.5834 | -0.037 | 0.164 | 0.0499 | 0.8233 |
| CASC15 | rs9295513   | 21599766 | G,A | 0.9746 | 0.8988 | 0.059  | 0.265 | 0.0497 | 0.8236 |
| CASC15 | rs144306476 | 21721932 | T,G | 0.989  | 0.6617 | -0.102 | 0.46  | 0.0488 | 0.8251 |
| CASC15 | rs78870816  | 21665363 | C,T | 0.9434 | 0.7804 | -0.044 | 0.199 | 0.0483 | 0.826  |
| CASC15 | rs9466143   | 21676688 | A,T | 0.943  | 0.8542 | -0.038 | 0.174 | 0.0473 | 0.8277 |
| CASC15 | rs111374956 | 21699545 | G,C | 0.9871 | 0.5681 | -0.082 | 0.376 | 0.0471 | 0.8281 |
| CASC15 | rs112117324 | 21606452 | C,T | 0.9756 | 0.8592 | -0.055 | 0.266 | 0.0424 | 0.8369 |
| CASC15 | rs78584681  | 21743570 | R,D | 0.7497 | 0.6177 | -0.024 | 0.117 | 0.0417 | 0.8382 |
| CASC15 | rs9466144   | 21676886 | G,T | 0.943  | 0.852  | -0.035 | 0.174 | 0.0407 | 0.8401 |
| CASC15 | rs548873349 | 21736947 | R,I | 0.8405 | 0.7508 | -0.025 | 0.125 | 0.0406 | 0.8404 |
| CASC15 | rs139419250 | 21696871 | R,I | 0.9475 | 0.5307 | -0.042 | 0.209 | 0.0396 | 0.8422 |
| CASC15 | rs113183700 | 21702524 | A,G | 0.9869 | 0.5842 | -0.073 | 0.369 | 0.0394 | 0.8426 |
| CASC15 | rs116300170 | 21663541 | G,A | 0.9641 | 0.8099 | -0.052 | 0.261 | 0.039  | 0.8434 |
| CASC15 | rs75159243  | 21656071 | A,T | 0.9838 | 0.4842 | -0.09  | 0.459 | 0.0388 | 0.8438 |
| CASC15 | rs145778004 | 21696926 | R,I | 0.9468 | 0.5319 | -0.041 | 0.208 | 0.0385 | 0.8445 |
| CASC15 | rs1744855   | 21623715 | G,A | 0.3803 | 0.9708 | -0.016 | 0.085 | 0.038  | 0.8455 |
| CASC15 | rs66735249  | 21686666 | D,R | 0.551  | 0.8357 | -0.017 | 0.09  | 0.0374 | 0.8467 |
| CASC15 | rs6900485   | 21697055 | A,T | 0.9471 | 0.5382 | -0.04  | 0.208 | 0.0372 | 0.8472 |
| CASC15 | rs6900676   | 21697176 | A,G | 0.9471 | 0.5384 | -0.04  | 0.208 | 0.0367 | 0.848  |
| CASC15 | rs115061151 | 21659040 | A,C | 0.9843 | 0.4916 | -0.088 | 0.461 | 0.0366 | 0.8482 |
| CASC15 | rs7759991   | 21609547 | C,T | 0.6977 | 0.9669 | 0.017  | 0.089 | 0.0366 | 0.8484 |
| CASC15 | rs1744848   | 21609563 | C,T | 0.6977 | 0.9669 | 0.017  | 0.089 | 0.0365 | 0.8485 |
| CASC15 | rs113534734 | 21596349 | R,D | 0.9404 | 0.7354 | -0.038 | 0.204 | 0.0349 | 0.8518 |

|        |             |          |     |        |        |        |       |        |        |
|--------|-------------|----------|-----|--------|--------|--------|-------|--------|--------|
| CASC15 | rs78471563  | 21679073 | T,A | 0.9895 | 0.9404 | -0.078 | 0.417 | 0.0348 | 0.852  |
| CASC15 | rs10080820  | 21655815 | C,G | 0.983  | 0.7561 | 0.062  | 0.332 | 0.0343 | 0.8531 |
| CASC15 | rs16885170  | 21716554 | G,A | 0.8229 | 0.9708 | 0.019  | 0.105 | 0.0337 | 0.8544 |
| CASC15 | rs6918842   | 21691009 | C,T | 0.5679 | 0.9924 | -0.015 | 0.082 | 0.0321 | 0.8578 |
| CASC15 | rs150555050 | 21561633 | G,A | 0.9894 | 0.5125 | 0.088  | 0.49  | 0.032  | 0.858  |
| CASC15 | rs116104882 | 21654116 | G,C | 0.9607 | 0.7845 | -0.046 | 0.255 | 0.032  | 0.8581 |
| CASC15 | rs111928162 | 21706372 | T,C | 0.9868 | 0.6035 | -0.065 | 0.362 | 0.0319 | 0.8582 |
| CASC15 | rs6456441   | 21658313 | A,T | 0.9842 | 0.4898 | -0.083 | 0.462 | 0.0319 | 0.8583 |
| CASC15 | rs6941630   | 21679102 | C,T | 0.5039 | 0.9783 | -0.015 | 0.087 | 0.0304 | 0.8615 |
| CASC15 | rs61661762  | 21588463 | A,G | 0.9883 | 0.3149 | 0.116  | 0.665 | 0.0303 | 0.8617 |
| CASC15 | rs71563992  | 21655825 | G,T | 0.9888 | 0.8713 | -0.072 | 0.42  | 0.0293 | 0.864  |
| CASC15 | rs1744847   | 21695888 | C,T | 0.9409 | 0.4743 | 0.043  | 0.252 | 0.0292 | 0.8644 |
| CASC15 | rs9368325   | 21577508 | C,T | 0.8604 | 0.347  | 0.033  | 0.199 | 0.0277 | 0.8677 |
| CASC15 | rs79853707  | 21699451 | C,T | 0.986  | 0.5502 | -0.062 | 0.37  | 0.0277 | 0.8678 |
| CASC15 | rs147276150 | 21701200 | A,G | 0.9274 | 0.4176 | -0.042 | 0.257 | 0.0273 | 0.8687 |
| CASC15 | rs10080752  | 21655608 | C,G | 0.9819 | 0.7225 | 0.054  | 0.331 | 0.0269 | 0.8697 |
| CASC15 | rs77625474  | 21604127 | G,T | 0.9308 | 0.9762 | -0.025 | 0.16  | 0.0255 | 0.873  |
| CASC15 | rs62403974  | 21713978 | T,C | 0.7736 | 0.9053 | -0.016 | 0.101 | 0.0251 | 0.8742 |
| CASC15 | rs61215435  | 21721256 | C,T | 0.9893 | 0.7083 | 0.068  | 0.431 | 0.0249 | 0.8747 |
| CASC15 | rs2759362   | 21681885 | G,A | 0.5173 | 0.8653 | -0.014 | 0.093 | 0.0243 | 0.8762 |
| CASC15 | rs59015153  | 21574306 | T,A | 0.9504 | 0.4712 | 0.042  | 0.27  | 0.0241 | 0.8767 |
| CASC15 | rs139032454 | 21644326 | A,C | 0.9757 | 0.7441 | 0.045  | 0.291 | 0.0238 | 0.8773 |
| CASC15 | rs9466133   | 21643948 | C,T | 0.9757 | 0.7442 | 0.045  | 0.291 | 0.0235 | 0.8782 |
| CASC15 | rs1744861   | 21627986 | A,T | 0.3793 | 0.9676 | -0.013 | 0.085 | 0.0234 | 0.8784 |
| CASC15 | rs9460656   | 21643907 | A,G | 0.9758 | 0.7442 | 0.044  | 0.291 | 0.023  | 0.8795 |
| CASC15 | rs1617781   | 21608766 | A,G | 0.693  | 0.9819 | 0.013  | 0.088 | 0.0227 | 0.8801 |
| CASC15 | rs1740861   | 21678006 | T,C | 0.5038 | 0.9738 | -0.013 | 0.087 | 0.0226 | 0.8805 |
| CASC15 | rs112102336 | 21677692 | G,T | 0.9639 | 0.7866 | -0.039 | 0.263 | 0.0225 | 0.8807 |
| CASC15 | rs116779637 | 21718919 | G,T | 0.9886 | 0.7935 | -0.061 | 0.409 | 0.0225 | 0.8808 |
| CASC15 | rs1475149   | 21688142 | G,A | 0.5662 | 0.9247 | -0.013 | 0.085 | 0.0222 | 0.8817 |
| CASC15 | rs1744891   | 21679835 | G,A | 0.5058 | 0.9872 | -0.013 | 0.087 | 0.022  | 0.8821 |
| CASC15 | rs34987769  | 21678839 | R,I | 0.5043 | 0.9785 | -0.013 | 0.087 | 0.0213 | 0.8841 |
| CASC15 | rs9348483   | 21687390 | G,T | 0.7953 | 0.87   | 0.016  | 0.108 | 0.0209 | 0.8851 |
| CASC15 | rs540918539 | 21717464 | R,D | 0.9882 | 0.804  | -0.057 | 0.402 | 0.0198 | 0.8881 |
| CASC15 | rs114266456 | 21633347 | G,A | 0.9661 | 0.7099 | -0.038 | 0.275 | 0.0191 | 0.89   |
| CASC15 | rs531584400 | 21574100 | R,D | 0.9506 | 0.471  | 0.037  | 0.271 | 0.019  | 0.8905 |
| CASC15 | rs1622043   | 21609285 | A,G | 0.6925 | 0.9814 | 0.012  | 0.088 | 0.0186 | 0.8916 |
| CASC15 | rs150184400 | 21642793 | T,C | 0.9758 | 0.7454 | 0.04   | 0.291 | 0.0185 | 0.8918 |
| CASC15 | rs11961107  | 21642740 | G,A | 0.9758 | 0.7454 | 0.039  | 0.291 | 0.0184 | 0.8922 |
| CASC15 | rs12332790  | 21642505 | C,T | 0.9758 | 0.7456 | 0.039  | 0.291 | 0.0175 | 0.8946 |
| CASC15 | rs35528538  | 21613493 | R,D | 0.8281 | 0.9642 | -0.015 | 0.114 | 0.017  | 0.8963 |
| CASC15 | rs62404141  | 21614140 | G,A | 0.8281 | 0.9622 | -0.015 | 0.114 | 0.0166 | 0.8974 |
| CASC15 | rs74492370  | 21679606 | G,A | 0.9678 | 0.8228 | -0.033 | 0.275 | 0.0149 | 0.9029 |
| CASC15 | rs78971333  | 21679601 | C,T | 0.9678 | 0.8229 | -0.033 | 0.275 | 0.0148 | 0.9031 |
| CASC15 | rs185494084 | 21636537 | T,C | 0.9884 | 0.4475 | 0.075  | 0.635 | 0.014  | 0.9058 |

|        |             |          |     |        |        |        |       |        |        |
|--------|-------------|----------|-----|--------|--------|--------|-------|--------|--------|
| CASC15 | rs11361021  | 21608909 | D,R | 0.6928 | 0.9683 | 0.01   | 0.089 | 0.0125 | 0.9111 |
| CASC15 | rs7772335   | 21696185 | C,T | 0.8913 | 0.4593 | -0.02  | 0.19  | 0.011  | 0.9164 |
| CASC15 | rs1740855   | 21680782 | C,T | 0.5021 | 0.9879 | -0.009 | 0.088 | 0.0105 | 0.9182 |
| CASC15 | rs74329629  | 21583401 | G,A | 0.9656 | 0.5138 | -0.032 | 0.316 | 0.0105 | 0.9184 |
| CASC15 | rs9295515   | 21641667 | C,T | 0.976  | 0.7495 | 0.029  | 0.29  | 0.0102 | 0.9194 |
| CASC15 | rs1744893   | 21680746 | T,C | 0.5019 | 0.987  | -0.009 | 0.089 | 0.0101 | 0.9199 |
| CASC15 | rs145545902 | 21735584 | D,R | 0.6454 | 0.9341 | -0.009 | 0.089 | 0.0098 | 0.9212 |
| CASC15 | rs77273443  | 21620705 | G,A | 0.984  | 0.938  | -0.029 | 0.295 | 0.0096 | 0.9219 |
| CASC15 | rs77354845  | 21621783 | A,G | 0.9841 | 0.9371 | -0.029 | 0.296 | 0.0095 | 0.9225 |
| CASC15 | rs1740853   | 21684065 | G,A | 0.5152 | 0.7328 | 0.01   | 0.102 | 0.0092 | 0.9234 |
| CASC15 | rs144178641 | 21622568 | C,T | 0.984  | 0.926  | -0.028 | 0.297 | 0.009  | 0.9243 |
| CASC15 | rs527350470 | 21640569 | R,D | 0.9745 | 0.7043 | 0.027  | 0.29  | 0.0089 | 0.9249 |
| CASC15 | rs9460650   | 21615371 | T,C | 0.9841 | 0.9776 | -0.026 | 0.289 | 0.0082 | 0.9279 |
| CASC15 | rs9460649   | 21614884 | G,A | 0.9843 | 0.994  | -0.026 | 0.288 | 0.0081 | 0.9282 |
| CASC15 | rs12333154  | 21640855 | G,A | 0.976  | 0.751  | 0.026  | 0.29  | 0.0078 | 0.9294 |
| CASC15 | rs77518511  | 21690391 | A,G | 0.9839 | 0.4553 | -0.042 | 0.473 | 0.0079 | 0.9294 |
| CASC15 | rs78825652  | 21609539 | I,R | 0.6732 | 0.9671 | 0.008  | 0.086 | 0.0077 | 0.9301 |
| CASC15 | rs141253251 | 21567552 | G,A | 0.9772 | 0.4147 | 0.035  | 0.411 | 0.007  | 0.9331 |
| CASC15 | rs558880181 | 21699974 | R,D | 0.9241 | 0.5575 | -0.015 | 0.177 | 0.007  | 0.9334 |
| CASC15 | rs11966675  | 21640125 | G,A | 0.9761 | 0.7522 | 0.024  | 0.29  | 0.0069 | 0.9338 |
| CASC15 | rs114981716 | 21562453 | G,A | 0.977  | 0.3896 | 0.035  | 0.423 | 0.0068 | 0.9343 |
| CASC15 | rs1744896   | 21681103 | A,G | 0.5038 | 0.9407 | -0.007 | 0.091 | 0.0065 | 0.9359 |
| CASC15 | rs142641808 | 21677158 | C,T | 0.9656 | 0.7625 | -0.022 | 0.279 | 0.0063 | 0.937  |
| CASC15 | rs574039752 | 21629819 | R,D | 0.3639 | 0.9279 | -0.007 | 0.088 | 0.0062 | 0.9375 |
| CASC15 | rs1740856   | 21681223 | G,A | 0.5041 | 0.9379 | -0.007 | 0.091 | 0.0058 | 0.9391 |
| CASC15 | rs13215657  | 21683714 | C,T | 0.511  | 0.7765 | 0.008  | 0.099 | 0.0058 | 0.9395 |
| CASC15 | rs114613272 | 21721382 | C,T | 0.984  | 0.8169 | -0.027 | 0.353 | 0.0057 | 0.9401 |
| CASC15 | rs10155733  | 21639594 | C,T | 0.9761 | 0.7534 | 0.022  | 0.289 | 0.0056 | 0.9402 |
| CASC15 | rs10155732  | 21639540 | C,T | 0.9761 | 0.7536 | 0.021  | 0.289 | 0.0054 | 0.9413 |
| CASC15 | rs148317817 | 21638986 | G,A | 0.9761 | 0.7532 | 0.021  | 0.289 | 0.0052 | 0.9422 |
| CASC15 | rs147273446 | 21638982 | C,G | 0.9761 | 0.7533 | 0.021  | 0.289 | 0.0051 | 0.9429 |
| CASC15 | rs12333123  | 21640660 | G,A | 0.9848 | 0.7705 | 0.024  | 0.353 | 0.0045 | 0.9465 |
| CASC15 | rs9466129   | 21610137 | C,G | 0.9838 | 0.9565 | 0.017  | 0.292 | 0.0033 | 0.9541 |
| CASC15 | rs77394991  | 21735578 | C,T | 0.8447 | 0.9263 | -0.006 | 0.114 | 0.0031 | 0.9556 |
| CASC15 | rs2749681   | 21683792 | A,G | 0.5085 | 0.771  | 0.005  | 0.099 | 0.0027 | 0.9586 |
| CASC15 | rs76475505  | 21611890 | T,G | 0.9837 | 0.9609 | 0.015  | 0.29  | 0.0027 | 0.9587 |
| CASC15 | rs138882930 | 21638300 | A,G | 0.9761 | 0.7432 | 0.015  | 0.291 | 0.0026 | 0.9593 |
| CASC15 | rs114977922 | 21638119 | C,G | 0.9762 | 0.7437 | 0.014  | 0.291 | 0.0024 | 0.9606 |
| CASC15 | rs1740849   | 21619809 | G,A | 0.3637 | 0.9622 | -0.004 | 0.087 | 0.0024 | 0.9612 |
| CASC15 | rs75122426  | 21580566 | T,C | 0.985  | 0.6235 | 0.019  | 0.399 | 0.0024 | 0.9612 |
| CASC15 | rs9466126   | 21601762 | A,C | 0.9836 | 0.9467 | 0.014  | 0.306 | 0.0022 | 0.9627 |
| CASC15 | rs1740857   | 21681617 | T,G | 0.5067 | 0.8693 | -0.004 | 0.095 | 0.002  | 0.964  |
| CASC15 | rs62406884  | 21696308 | C,T | 0.9205 | 0.414  | -0.011 | 0.242 | 0.002  | 0.9642 |
| CASC15 | rs80230506  | 21655914 | C,A | 0.9607 | 0.7829 | 0.011  | 0.253 | 0.0019 | 0.9648 |
| CASC15 | rs143636013 | 21649787 | G,C | 0.9413 | 0.7828 | 0.009  | 0.2   | 0.0019 | 0.9653 |

|        |             |          |     |        |        |        |       |        |        |
|--------|-------------|----------|-----|--------|--------|--------|-------|--------|--------|
| CASC15 | rs75157802  | 21678178 | A,G | 0.9675 | 0.834  | -0.012 | 0.269 | 0.0019 | 0.9656 |
| CASC15 | rs5874829   | 21738740 | R,I | 0.8074 | 0.7675 | 0.005  | 0.119 | 0.0018 | 0.9661 |
| CASC15 | rs1744892   | 21680206 | A,G | 0.4953 | 0.9943 | -0.004 | 0.088 | 0.0017 | 0.9668 |
| CASC15 | rs74323084  | 21645152 | C,G | 0.9857 | 0.7691 | -0.017 | 0.408 | 0.0017 | 0.9671 |
| CASC15 | rs78474141  | 21604475 | G,T | 0.9839 | 0.9516 | 0.012  | 0.297 | 0.0017 | 0.9672 |
| CASC15 | rs1740858   | 21682180 | C,T | 0.507  | 0.8636 | -0.004 | 0.095 | 0.0015 | 0.969  |
| CASC15 | rs1740859   | 21682298 | C,T | 0.5072 | 0.8627 | -0.004 | 0.095 | 0.0015 | 0.9691 |
| CASC15 | rs78378200  | 21647275 | T,C | 0.985  | 0.7319 | -0.016 | 0.408 | 0.0015 | 0.9692 |
| CASC15 | rs7763048   | 21681780 | G,A | 0.4974 | 0.8635 | 0.003  | 0.094 | 0.0013 | 0.9712 |
| CASC15 | rs4616978   | 21606129 | G,A | 0.8111 | 0.9353 | -0.003 | 0.109 | 0.001  | 0.9744 |
| CASC15 | rs150235785 | 21638293 | G,A | 0.9849 | 0.7598 | 0.011  | 0.356 | 0.001  | 0.9746 |
| CASC15 | rs397888201 | 21681363 | R,D | 0.4982 | 0.7168 | 0.003  | 0.104 | 0.001  | 0.9747 |
| CASC15 | rs145648458 | 21636404 | T,C | 0.9762 | 0.7475 | 0.007  | 0.29  | 0.0006 | 0.9798 |
| CASC15 | rs1744894   | 21680886 | T,C | 0.4962 | 0.9953 | -0.002 | 0.088 | 0.0006 | 0.9805 |
| CASC15 | rs7772583   | 21726279 | G,A | 0.6306 | 0.9061 | -0.002 | 0.089 | 0.0005 | 0.9827 |
| CASC15 | rs12200574  | 21683353 | G,A | 0.5092 | 0.842  | 0.002  | 0.095 | 0.0003 | 0.9872 |
| CASC15 | rs59880840  | 21556245 | G,A | 0.9598 | 0.3138 | -0.006 | 0.362 | 0.0003 | 0.9873 |
| CASC15 | rs34954830  | 21632488 | R,I | 0.9584 | 0.5469 | 0.004  | 0.255 | 0.0002 | 0.9875 |
| CASC15 | rs149385127 | 21642947 | G,A | 0.9849 | 0.723  | -0.006 | 0.41  | 0.0002 | 0.9878 |
| CASC15 | rs61157774  | 21556217 | C,T | 0.9598 | 0.3134 | -0.005 | 0.363 | 0.0002 | 0.9882 |
| CASC15 | rs13219202  | 21683982 | G,A | 0.5273 | 0.7259 | -0.002 | 0.104 | 0.0002 | 0.9883 |
| CASC15 | rs13219086  | 21683929 | G,C | 0.5137 | 0.7654 | 0.001  | 0.1   | 0.0002 | 0.9895 |
| CASC15 | rs78714768  | 21631590 | C,T | 0.9845 | 0.8158 | -0.003 | 0.331 | 0.0001 | 0.9939 |
| CASC15 | rs34810044  | 21718703 | R,D | 0.7721 | 0.9072 | 0      | 0.099 | 0      | 0.9961 |
| CASC15 | rs1744895   | 21680899 | G,C | 0.4958 | 1      | 0      | 0.088 | 0      | 0.9982 |
| CASC15 | rs549313068 | 21638634 | R,D | 0.9854 | 0.7268 | 0      | 0.421 | 0      | 0.9999 |

SNP association with **CDKAL1** sorted by p-value

|        |             |          |     |        |        |        |       |        |          |
|--------|-------------|----------|-----|--------|--------|--------|-------|--------|----------|
| CDKAL1 | rs79164129  | 21601917 | T,C | 0.9855 | 0.3283 | 0.747  | 0.266 | 7.88   | 0.004998 |
| CDKAL1 | rs2251647   | 21677746 | C,A | 0.9512 | 0.9786 | 0.231  | 0.088 | 6.7986 | 0.009123 |
| CDKAL1 | rs201884896 | 21657694 | D,R | 0.9455 | 0.3238 | 0.372  | 0.148 | 6.3512 | 0.01173  |
| CDKAL1 | rs7772335   | 21696185 | C,T | 0.8913 | 0.4593 | -0.208 | 0.084 | 6.192  | 0.01283  |
| CDKAL1 | rs66647983  | 21633079 | R,D | 0.5368 | 0.3749 | -0.132 | 0.059 | 5.0066 | 0.02525  |
| CDKAL1 | rs114455294 | 21693186 | A,T | 0.9731 | 0.5546 | -0.287 | 0.132 | 4.7061 | 0.03006  |
| CDKAL1 | rs1740849   | 21619809 | G,A | 0.3637 | 0.9622 | -0.079 | 0.038 | 4.2455 | 0.03936  |
| CDKAL1 | rs571708107 | 21634038 | D,R | 0.6795 | 0.8686 | 0.084  | 0.042 | 4.0624 | 0.04385  |
| CDKAL1 | rs75994264  | 21745903 | C,T | 0.9868 | 0.3369 | -0.504 | 0.251 | 4.0444 | 0.04432  |
| CDKAL1 | rs60368679  | 21746134 | C,T | 0.9868 | 0.3206 | -0.514 | 0.257 | 4.0132 | 0.04515  |
| CDKAL1 | rs534329540 | 21629251 | R,I | 0.4972 | 0.5784 | -0.097 | 0.048 | 3.9977 | 0.04556  |
| CDKAL1 | rs1744855   | 21623715 | G,A | 0.3803 | 0.9708 | -0.074 | 0.037 | 3.9652 | 0.04645  |
| CDKAL1 | rs1744861   | 21627986 | A,T | 0.3793 | 0.9676 | -0.074 | 0.037 | 3.9605 | 0.04658  |
| CDKAL1 | rs1740837   | 21633917 | C,T | 0.6783 | 0.9174 | 0.079  | 0.04  | 3.8783 | 0.04891  |
| CDKAL1 | rs1740838   | 21632759 | G,T | 0.3851 | 0.7571 | -0.082 | 0.042 | 3.7777 | 0.05194  |
| CDKAL1 | rs115733488 | 21695961 | T,C | 0.9892 | 0.5305 | -0.357 | 0.184 | 3.7584 | 0.05254  |
| CDKAL1 | rs7754702   | 21696403 | T,C | 0.9482 | 0.5267 | -0.192 | 0.099 | 3.742  | 0.05306  |
| CDKAL1 | rs111405274 | 21694954 | A,G | 0.9508 | 0.5151 | -0.204 | 0.106 | 3.7005 | 0.0544   |



|        |             |          |     |        |        |        |       |        |         |
|--------|-------------|----------|-----|--------|--------|--------|-------|--------|---------|
| CDKAL1 | rs574039752 | 21629819 | R,D | 0.3639 | 0.9279 | -0.074 | 0.039 | 3.6944 | 0.0546  |
| CDKAL1 | rs79337490  | 21695025 | T,C | 0.9508 | 0.5151 | -0.203 | 0.106 | 3.6933 | 0.05463 |
| CDKAL1 | rs594933338 | 21646242 | T,A | 0.701  | 0.8468 | 0.083  | 0.044 | 3.6608 | 0.05571 |
| CDKAL1 | rs1744856   | 21625895 | G,A | 0.6341 | 0.4717 | -0.106 | 0.055 | 3.6402 | 0.0564  |
| CDKAL1 | rs1740833   | 21646435 | A,G | 0.6798 | 0.9621 | 0.076  | 0.04  | 3.6377 | 0.05649 |
| CDKAL1 | rs111232506 | 21744922 | C,T | 0.9798 | 0.3015 | -0.385 | 0.203 | 3.5898 | 0.05814 |
| CDKAL1 | rs7772692   | 21696544 | A,G | 0.9472 | 0.5318 | -0.184 | 0.097 | 3.586  | 0.05827 |
| CDKAL1 | rs73378032  | 21744446 | C,A | 0.9796 | 0.3201 | -0.371 | 0.197 | 3.5722 | 0.05875 |
| CDKAL1 | rs112524196 | 21743604 | G,A | 0.9794 | 0.3214 | -0.368 | 0.195 | 3.552  | 0.05947 |
| CDKAL1 | rs113889001 | 21695381 | A,C | 0.9496 | 0.5091 | -0.196 | 0.104 | 3.5145 | 0.06083 |
| CDKAL1 | rs7754895   | 21696533 | T,C | 0.9459 | 0.5325 | -0.175 | 0.096 | 3.3259 | 0.0682  |
| CDKAL1 | rs9295514   | 21636585 | A,G | 0.7107 | 0.9234 | 0.079  | 0.043 | 3.2987 | 0.06934 |
| CDKAL1 | rs80309179  | 21644884 | G,T | 0.9894 | 0.4434 | 0.529  | 0.294 | 3.2282 | 0.07238 |
| CDKAL1 | rs7756206   | 21635314 | T,G | 0.7423 | 0.8724 | 0.082  | 0.046 | 3.2262 | 0.07247 |
| CDKAL1 | rs1744890   | 21678059 | A,G | 0.8017 | 0.7924 | 0.09   | 0.051 | 3.0734 | 0.07958 |
| CDKAL1 | rs1740866   | 21664729 | T,G | 0.7801 | 0.807  | 0.089  | 0.051 | 3.0389 | 0.08129 |
| CDKAL1 | rs1615194   | 21648442 | T,C | 0.7437 | 0.9296 | 0.078  | 0.045 | 3.0161 | 0.08244 |
| CDKAL1 | rs9466128   | 21606679 | G,T | 0.3766 | 0.995  | -0.064 | 0.037 | 3.0092 | 0.08279 |
| CDKAL1 | rs6456439   | 21645743 | T,G | 0.7125 | 0.9939 | 0.072  | 0.042 | 2.9768 | 0.08447 |
| CDKAL1 | rs112837708 | 21696451 | G,A | 0.9648 | 0.4436 | -0.216 | 0.126 | 2.9618 | 0.08525 |
| CDKAL1 | rs1740860   | 21678055 | T,C | 0.7991 | 0.7824 | 0.089  | 0.052 | 2.9566 | 0.08553 |
| CDKAL1 | rs111374956 | 21699545 | G,C | 0.9871 | 0.5681 | -0.284 | 0.165 | 2.9466 | 0.08606 |
| CDKAL1 | rs10643502  | 21641556 | T,C | 0.688  | 0.853  | 0.073  | 0.043 | 2.9352 | 0.08667 |
| CDKAL1 | rs1740831   | 21647589 | G,A | 0.7131 | 0.9772 | 0.073  | 0.042 | 2.9312 | 0.08688 |
| CDKAL1 | rs113183700 | 21702524 | A,G | 0.9869 | 0.5842 | -0.275 | 0.162 | 2.8851 | 0.0894  |
| CDKAL1 | rs79853707  | 21699451 | C,T | 0.986  | 0.5502 | -0.274 | 0.162 | 2.8422 | 0.09182 |
| CDKAL1 | rs1740827   | 21650969 | A,T | 0.7378 | 0.9342 | 0.074  | 0.044 | 2.8192 | 0.09314 |
| CDKAL1 | rs7744188   | 21694601 | T,C | 0.9149 | 0.6416 | -0.122 | 0.072 | 2.8124 | 0.09354 |
| CDKAL1 | rs111928162 | 21706372 | T,C | 0.9868 | 0.6035 | -0.266 | 0.159 | 2.8112 | 0.09361 |
| CDKAL1 | rs201513044 | 21589010 | R,D | 0.9897 | 0.4337 | -0.407 | 0.244 | 2.7762 | 0.09568 |
| CDKAL1 | rs2749682   | 21641716 | A,G | 0.6939 | 0.947  | 0.069  | 0.042 | 2.7725 | 0.0959  |
| CDKAL1 | rs11438117  | 21660100 | R,I | 0.4211 | 0.4868 | -0.087 | 0.053 | 2.7368 | 0.09806 |
| CDKAL1 | rs6912946   | 21659978 | A,T | 0.8051 | 0.821  | 0.086  | 0.052 | 2.7023 | 0.1002  |
| CDKAL1 | rs36027263  | 21648358 | I,R | 0.7129 | 0.8819 | 0.073  | 0.045 | 2.683  | 0.1014  |
| CDKAL1 | rs9460655   | 21641564 | C,T | 0.6926 | 0.8571 | 0.07   | 0.043 | 2.6622 | 0.1028  |
| CDKAL1 | rs1744865   | 21631078 | A,C | 0.6628 | 0.9515 | 0.064  | 0.04  | 2.6454 | 0.1038  |
| CDKAL1 | rs1740839   | 21629928 | G,A | 0.7114 | 0.9827 | 0.065  | 0.04  | 2.5917 | 0.1074  |
| CDKAL1 | rs35612989  | 21663201 | R,I | 0.4311 | 0.4511 | -0.086 | 0.054 | 2.5293 | 0.1117  |
| CDKAL1 | rs11753001  | 21726506 | T,C | 0.9147 | 0.5112 | 0.15   | 0.094 | 2.5271 | 0.1119  |
| CDKAL1 | rs1744875   | 21648534 | C,A | 0.4998 | 0.4732 | -0.088 | 0.055 | 2.5156 | 0.1127  |
| CDKAL1 | rs141673420 | 21695454 | T,C | 0.9835 | 0.3745 | -0.386 | 0.243 | 2.514  | 0.1128  |
| CDKAL1 | rs1744863   | 21629887 | A,G | 0.6612 | 0.9532 | 0.062  | 0.039 | 2.4839 | 0.115   |
| CDKAL1 | rs1744862   | 21629881 | C,A | 0.6612 | 0.9531 | 0.062  | 0.039 | 2.4831 | 0.1151  |
| CDKAL1 | rs147268567 | 21621169 | D,R | 0.6874 | 0.993  | 0.059  | 0.038 | 2.4194 | 0.1198  |
| CDKAL1 | rs149019701 | 21621670 | D,R | 0.6874 | 0.9939 | 0.059  | 0.038 | 2.4202 | 0.1198  |

|        |             |          |     |        |        |        |       |        |        |
|--------|-------------|----------|-----|--------|--------|--------|-------|--------|--------|
| CDKAL1 | rs1740846   | 21621045 | A,G | 0.6874 | 0.9924 | 0.059  | 0.038 | 2.4183 | 0.1199 |
| CDKAL1 | rs1744849   | 21612949 | A,G | 0.7238 | 1      | 0.063  | 0.04  | 2.4192 | 0.1199 |
| CDKAL1 | rs1740845   | 21621731 | G,A | 0.6871 | 0.9929 | 0.059  | 0.038 | 2.412  | 0.1204 |
| CDKAL1 | rs1744852   | 21621724 | A,G | 0.6871 | 0.9927 | 0.059  | 0.038 | 2.412  | 0.1204 |
| CDKAL1 | rs1744884   | 21663449 | G,A | 0.7593 | 0.786  | 0.076  | 0.049 | 2.3919 | 0.122  |
| CDKAL1 | rs542285387 | 21621459 | I,R | 0.6862 | 0.9884 | 0.059  | 0.038 | 2.3688 | 0.1238 |
| CDKAL1 | rs1740830   | 21648615 | C,T | 0.867  | 0.7367 | 0.097  | 0.063 | 2.3655 | 0.124  |
| CDKAL1 | rs1740867   | 21663105 | C,T | 0.7594 | 0.7883 | 0.075  | 0.049 | 2.361  | 0.1244 |
| CDKAL1 | rs1740847   | 21620469 | C,A | 0.6882 | 0.9889 | 0.058  | 0.038 | 2.3372 | 0.1263 |
| CDKAL1 | rs1740848   | 21620293 | G,A | 0.6882 | 0.9886 | 0.058  | 0.038 | 2.3369 | 0.1263 |
| CDKAL1 | rs150555050 | 21561633 | G,A | 0.9894 | 0.5125 | -0.327 | 0.215 | 2.3109 | 0.1285 |
| CDKAL1 | rs7739585   | 21632295 | A,C | 0.6764 | 0.9279 | 0.062  | 0.041 | 2.3003 | 0.1293 |
| CDKAL1 | rs1744854   | 21623686 | C,T | 0.6725 | 0.9882 | 0.057  | 0.038 | 2.2783 | 0.1312 |
| CDKAL1 | rs1744853   | 21623386 | A,G | 0.6725 | 0.9887 | 0.057  | 0.038 | 2.2747 | 0.1315 |
| CDKAL1 | rs1740842   | 21623181 | G,A | 0.6726 | 0.9885 | 0.057  | 0.038 | 2.2737 | 0.1316 |
| CDKAL1 | rs1740844   | 21622871 | C,T | 0.6724 | 0.9911 | 0.057  | 0.038 | 2.2613 | 0.1326 |
| CDKAL1 | rs1740868   | 21660205 | G,T | 0.6798 | 0.8487 | 0.062  | 0.041 | 2.2593 | 0.1328 |
| CDKAL1 | rs60908846  | 21646239 | I,R | 0.758  | 0.8675 | 0.07   | 0.046 | 2.2594 | 0.1328 |
| CDKAL1 | rs1740832   | 21646725 | A,G | 0.756  | 0.938  | 0.068  | 0.045 | 2.2492 | 0.1337 |
| CDKAL1 | rs201389513 | 21635326 | D,R | 0.7672 | 0.8696 | 0.07   | 0.047 | 2.2447 | 0.1341 |
| CDKAL1 | rs12528435  | 21562732 | G,A | 0.8866 | 0.355  | 0.141  | 0.094 | 2.2408 | 0.1344 |
| CDKAL1 | rs1744876   | 21651003 | T,C | 0.8157 | 0.9901 | 0.071  | 0.047 | 2.2403 | 0.1345 |
| CDKAL1 | rs7739607   | 21632345 | G,C | 0.6821 | 0.9067 | 0.062  | 0.042 | 2.2379 | 0.1347 |
| CDKAL1 | rs6939472   | 21661019 | G,C | 0.7866 | 0.7792 | 0.077  | 0.052 | 2.2339 | 0.135  |
| CDKAL1 | rs9466127   | 21602745 | G,A | 0.9739 | 0.9906 | 0.157  | 0.105 | 2.2194 | 0.1363 |
| CDKAL1 | rs1744885   | 21670816 | A,G | 0.4476 | 0.9803 | -0.06  | 0.04  | 2.216  | 0.1366 |
| CDKAL1 | rs529643978 | 21641557 | D,R | 0.7285 | 0.854  | 0.067  | 0.045 | 2.2109 | 0.137  |
| CDKAL1 | rs370328808 | 21641504 | D,R | 0.7285 | 0.8536 | 0.067  | 0.045 | 2.2102 | 0.1371 |
| CDKAL1 | rs9460651   | 21622531 | G,T | 0.672  | 0.9951 | 0.056  | 0.038 | 2.2096 | 0.1372 |
| CDKAL1 | rs113411153 | 21641562 | D,R | 0.7285 | 0.8541 | 0.067  | 0.045 | 2.2089 | 0.1372 |
| CDKAL1 | rs561593549 | 21641496 | C,T | 0.7285 | 0.8534 | 0.067  | 0.045 | 2.2093 | 0.1372 |
| CDKAL1 | rs562290828 | 21641555 | D,R | 0.7285 | 0.8538 | 0.067  | 0.045 | 2.2086 | 0.1372 |
| CDKAL1 | rs35857450  | 21622415 | D,R | 0.6703 | 0.8902 | 0.059  | 0.04  | 2.2035 | 0.1377 |
| CDKAL1 | rs1740865   | 21668071 | C,A | 0.5314 | 0.8949 | -0.061 | 0.041 | 2.1924 | 0.1387 |
| CDKAL1 | rs7751661   | 21621850 | G,A | 0.6705 | 1      | 0.055  | 0.038 | 2.1839 | 0.1395 |
| CDKAL1 | rs2759362   | 21681885 | G,A | 0.5173 | 0.8653 | -0.06  | 0.041 | 2.1555 | 0.1421 |
| CDKAL1 | rs72317305  | 21669872 | R,D | 0.5156 | 0.9662 | -0.058 | 0.04  | 2.1432 | 0.1432 |
| CDKAL1 | rs34987769  | 21678839 | R,I | 0.5043 | 0.9785 | -0.056 | 0.038 | 2.141  | 0.1434 |
| CDKAL1 | rs1744886   | 21671092 | A,T | 0.5151 | 0.9725 | -0.058 | 0.039 | 2.1336 | 0.1441 |
| CDKAL1 | rs9295513   | 21599766 | G,A | 0.9746 | 0.8988 | 0.169  | 0.116 | 2.1153 | 0.1458 |
| CDKAL1 | rs11327351  | 21623643 | D,R | 0.6711 | 0.9267 | 0.058  | 0.04  | 2.1083 | 0.1465 |
| CDKAL1 | rs1744870   | 21638485 | A,C | 0.734  | 0.9006 | 0.065  | 0.045 | 2.0845 | 0.1488 |
| CDKAL1 | rs201453060 | 21648925 | R,I | 0.5221 | 0.4872 | -0.079 | 0.055 | 2.0696 | 0.1503 |
| CDKAL1 | rs9466129   | 21610137 | C,G | 0.9838 | 0.9565 | 0.184  | 0.128 | 2.0616 | 0.151  |
| CDKAL1 | rs75122426  | 21580566 | T,C | 0.985  | 0.6235 | 0.252  | 0.175 | 2.062  | 0.151  |

|        |             |          |     |        |        |        |       |        |        |
|--------|-------------|----------|-----|--------|--------|--------|-------|--------|--------|
| CDKAL1 | rs530522537 | 21694259 | R,D | 0.9305 | 0.6164 | -0.122 | 0.085 | 2.0589 | 0.1513 |
| CDKAL1 | rs6941630   | 21679102 | C,T | 0.5039 | 0.9783 | -0.055 | 0.038 | 2.0511 | 0.1521 |
| CDKAL1 | rs76475505  | 21611890 | T,G | 0.9837 | 0.9609 | 0.182  | 0.127 | 2.0502 | 0.1522 |
| CDKAL1 | rs1740834   | 21645207 | C,T | 0.7742 | 0.9378 | 0.066  | 0.046 | 2.0466 | 0.1525 |
| CDKAL1 | rs1744866   | 21631188 | C,T | 0.9885 | 0.3807 | 0.395  | 0.277 | 2.0415 | 0.1531 |
| CDKAL1 | rs1740861   | 21678006 | T,C | 0.5038 | 0.9738 | -0.054 | 0.038 | 2.0322 | 0.154  |
| CDKAL1 | rs9466126   | 21601762 | A,C | 0.9836 | 0.9467 | 0.191  | 0.134 | 2.0244 | 0.1548 |
| CDKAL1 | rs35605844  | 21674022 | D,R | 0.6185 | 0.9309 | 0.057  | 0.04  | 2.0097 | 0.1563 |
| CDKAL1 | rs78474141  | 21604475 | G,T | 0.9839 | 0.9516 | 0.185  | 0.131 | 2.0029 | 0.157  |
| CDKAL1 | rs1740841   | 21627053 | G,T | 0.6852 | 0.9798 | 0.055  | 0.039 | 1.9993 | 0.1574 |
| CDKAL1 | rs1744891   | 21679835 | G,A | 0.5058 | 0.9872 | -0.054 | 0.038 | 1.9961 | 0.1577 |
| CDKAL1 | rs1744858   | 21626190 | T,C | 0.6849 | 0.9807 | 0.055  | 0.039 | 1.9961 | 0.1577 |
| CDKAL1 | rs1744859   | 21626395 | T,C | 0.685  | 0.9803 | 0.055  | 0.039 | 1.995  | 0.1578 |
| CDKAL1 | rs2749683   | 21635327 | T,G | 0.767  | 0.8784 | 0.066  | 0.047 | 1.9669 | 0.1608 |
| CDKAL1 | rs56175726  | 21566498 | G,A | 0.9534 | 0.3503 | 0.195  | 0.139 | 1.966  | 0.1609 |
| CDKAL1 | rs6456438   | 21632215 | G,A | 0.7029 | 0.9547 | 0.057  | 0.041 | 1.9649 | 0.161  |
| CDKAL1 | rs73737558  | 21577723 | A,G | 0.9837 | 0.4293 | 0.285  | 0.204 | 1.9626 | 0.1612 |
| CDKAL1 | rs59880840  | 21556245 | G,A | 0.9598 | 0.3138 | 0.223  | 0.159 | 1.9618 | 0.1613 |
| CDKAL1 | rs61157774  | 21556217 | C,T | 0.9598 | 0.3134 | 0.223  | 0.159 | 1.9612 | 0.1614 |
| CDKAL1 | rs75179770  | 21568397 | C,T | 0.9582 | 0.4017 | 0.19   | 0.136 | 1.9451 | 0.1631 |
| CDKAL1 | rs77991965  | 21694060 | G,A | 0.9358 | 0.6372 | -0.123 | 0.088 | 1.9267 | 0.1651 |
| CDKAL1 | rs1740835   | 21637725 | G,A | 0.7724 | 0.8961 | 0.065  | 0.047 | 1.9162 | 0.1663 |
| CDKAL1 | rs1744867   | 21634171 | T,C | 0.7381 | 0.8918 | 0.062  | 0.045 | 1.8779 | 0.1706 |
| CDKAL1 | rs60459153  | 21570941 | G,A | 0.9572 | 0.4198 | 0.181  | 0.132 | 1.8718 | 0.1713 |
| CDKAL1 | rs1744873   | 21638871 | C,T | 0.7506 | 0.8981 | 0.062  | 0.046 | 1.8678 | 0.1717 |
| CDKAL1 | rs1744871   | 21638566 | C,T | 0.7505 | 0.8974 | 0.062  | 0.046 | 1.8617 | 0.1724 |
| CDKAL1 | rs1744872   | 21638599 | C,T | 0.7505 | 0.8975 | 0.062  | 0.046 | 1.8621 | 0.1724 |
| CDKAL1 | rs61197304  | 21570213 | G,A | 0.9581 | 0.4232 | 0.181  | 0.133 | 1.8594 | 0.1727 |
| CDKAL1 | rs76714354  | 21572464 | A,G | 0.9805 | 0.3806 | 0.269  | 0.197 | 1.859  | 0.1727 |
| CDKAL1 | rs10080752  | 21655608 | C,G | 0.9819 | 0.7225 | 0.197  | 0.145 | 1.842  | 0.1747 |
| CDKAL1 | rs150345835 | 21568080 | R,D | 0.983  | 0.3784 | 0.287  | 0.212 | 1.8292 | 0.1762 |
| CDKAL1 | rs1740863   | 21670641 | C,T | 0.6246 | 0.9994 | 0.052  | 0.039 | 1.823  | 0.177  |
| CDKAL1 | rs10080820  | 21655815 | C,G | 0.983  | 0.7561 | 0.197  | 0.146 | 1.8217 | 0.1771 |
| CDKAL1 | rs1740864   | 21668282 | G,A | 0.6096 | 0.9094 | 0.054  | 0.04  | 1.8188 | 0.1775 |
| CDKAL1 | rs1620996   | 21602552 | C,T | 0.8959 | 0.8139 | 0.087  | 0.065 | 1.8147 | 0.1779 |
| CDKAL1 | rs1740843   | 21623041 | G,A | 0.6876 | 0.9919 | 0.053  | 0.039 | 1.7973 | 0.18   |
| CDKAL1 | rs111442391 | 21730723 | C,T | 0.9726 | 0.3086 | 0.254  | 0.19  | 1.7815 | 0.182  |
| CDKAL1 | rs1744874   | 21640902 | T,C | 0.7492 | 0.9047 | 0.06   | 0.045 | 1.7751 | 0.1828 |
| CDKAL1 | rs11330136  | 21629471 | D,R | 0.7    | 0.9778 | 0.053  | 0.04  | 1.7531 | 0.1855 |
| CDKAL1 | rs1740852   | 21608979 | T,C | 0.895  | 0.9932 | 0.077  | 0.058 | 1.7421 | 0.1869 |
| CDKAL1 | rs1740850   | 21618925 | C,G | 0.7147 | 0.9839 | 0.053  | 0.04  | 1.7284 | 0.1886 |
| CDKAL1 | rs5874825   | 21634749 | I,R | 0.7699 | 0.8924 | 0.061  | 0.047 | 1.721  | 0.1896 |
| CDKAL1 | rs57761609  | 21683420 | D,R | 0.6127 | 0.8292 | 0.055  | 0.042 | 1.7183 | 0.1899 |
| CDKAL1 | rs9460649   | 21614884 | G,A | 0.9843 | 0.994  | 0.166  | 0.127 | 1.7083 | 0.1912 |
| CDKAL1 | rs9460650   | 21615371 | T,C | 0.9841 | 0.9776 | 0.166  | 0.127 | 1.7041 | 0.1918 |

|        |             |          |     |        |        |        |       |        |        |
|--------|-------------|----------|-----|--------|--------|--------|-------|--------|--------|
| CDKAL1 | rs113815998 | 21709365 | G,T | 0.9608 | 0.7324 | -0.13  | 0.1   | 1.6992 | 0.1924 |
| CDKAL1 | rs1744864   | 21630684 | C,T | 0.7008 | 1      | 0.051  | 0.04  | 1.6935 | 0.1931 |
| CDKAL1 | rs1740836   | 21634644 | G,A | 0.7705 | 0.8935 | 0.061  | 0.047 | 1.6942 | 0.1931 |
| CDKAL1 | rs1740840   | 21627378 | G,A | 0.7156 | 0.9808 | 0.052  | 0.04  | 1.6917 | 0.1934 |
| CDKAL1 | rs74926222  | 21568994 | C,T | 0.9816 | 0.3776 | 0.265  | 0.204 | 1.688  | 0.1939 |
| CDKAL1 | rs77273443  | 21620705 | G,A | 0.984  | 0.938  | 0.168  | 0.13  | 1.6747 | 0.1956 |
| CDKAL1 | rs77354845  | 21621783 | A,G | 0.9841 | 0.9371 | 0.168  | 0.13  | 1.6682 | 0.1965 |
| CDKAL1 | rs144178641 | 21622568 | C,T | 0.984  | 0.926  | 0.168  | 0.131 | 1.6622 | 0.1973 |
| CDKAL1 | rs1744850   | 21618916 | G,T | 0.7128 | 0.9828 | 0.051  | 0.04  | 1.66   | 0.1976 |
| CDKAL1 | rs9366406   | 21617668 | T,A | 0.7397 | 0.9296 | 0.054  | 0.042 | 1.6573 | 0.198  |
| CDKAL1 | rs1744851   | 21619810 | T,C | 0.7153 | 0.9819 | 0.052  | 0.04  | 1.6522 | 0.1987 |
| CDKAL1 | rs1740854   | 21680732 | A,C | 0.6112 | 0.9639 | 0.05   | 0.039 | 1.6433 | 0.1999 |
| CDKAL1 | rs36093392  | 21601725 | D,R | 0.7127 | 0.8142 | 0.055  | 0.043 | 1.6432 | 0.1999 |
| CDKAL1 | rs35001920  | 21676726 | R,D | 0.4775 | 0.9497 | -0.051 | 0.04  | 1.6314 | 0.2015 |
| CDKAL1 | rs59015153  | 21574306 | T,A | 0.9504 | 0.4712 | 0.151  | 0.118 | 1.6312 | 0.2015 |
| CDKAL1 | rs531584400 | 21574100 | R,D | 0.9506 | 0.471  | 0.152  | 0.119 | 1.6302 | 0.2017 |
| CDKAL1 | rs1740851   | 21616268 | T,C | 0.7152 | 0.9852 | 0.051  | 0.04  | 1.6272 | 0.2021 |
| CDKAL1 | rs4327678   | 21619771 | T,C | 0.7132 | 0.9834 | 0.05   | 0.04  | 1.5857 | 0.2079 |
| CDKAL1 | rs1744860   | 21627046 | A,G | 0.6998 | 0.9875 | 0.05   | 0.04  | 1.585  | 0.208  |
| CDKAL1 | rs1744857   | 21626067 | T,C | 0.6993 | 0.9886 | 0.05   | 0.04  | 1.5806 | 0.2087 |
| CDKAL1 | rs1744848   | 21609563 | C,T | 0.6977 | 0.9669 | 0.049  | 0.039 | 1.5792 | 0.2089 |
| CDKAL1 | rs7759991   | 21609547 | C,T | 0.6977 | 0.9669 | 0.049  | 0.039 | 1.5789 | 0.2089 |
| CDKAL1 | rs2749684   | 21676485 | C,T | 0.6168 | 0.9872 | 0.048  | 0.038 | 1.5637 | 0.2111 |
| CDKAL1 | rs147276150 | 21701200 | A,G | 0.9274 | 0.4176 | 0.141  | 0.113 | 1.5576 | 0.212  |
| CDKAL1 | rs1744847   | 21695888 | C,T | 0.9409 | 0.4743 | -0.138 | 0.111 | 1.5488 | 0.2133 |
| CDKAL1 | rs11361021  | 21608909 | D,R | 0.6928 | 0.9683 | 0.048  | 0.039 | 1.5485 | 0.2134 |
| CDKAL1 | rs1622043   | 21609285 | A,G | 0.6925 | 0.9814 | 0.048  | 0.039 | 1.5378 | 0.2149 |
| CDKAL1 | rs7742225   | 21685474 | G,A | 0.827  | 0.7132 | 0.07   | 0.056 | 1.5315 | 0.2159 |
| CDKAL1 | rs145648458 | 21636404 | T,C | 0.9762 | 0.7475 | 0.157  | 0.127 | 1.5189 | 0.2178 |
| CDKAL1 | rs1744889   | 21676795 | A,G | 0.6165 | 0.9936 | 0.047  | 0.038 | 1.5163 | 0.2182 |
| CDKAL1 | rs62406884  | 21696308 | C,T | 0.9205 | 0.414  | 0.131  | 0.106 | 1.5095 | 0.2192 |
| CDKAL1 | rs1744878   | 21652230 | A,C | 0.8076 | 0.9338 | 0.06   | 0.049 | 1.5058 | 0.2198 |
| CDKAL1 | rs7741780   | 21685460 | A,G | 0.8336 | 0.732  | 0.069  | 0.056 | 1.5036 | 0.2201 |
| CDKAL1 | rs9466145   | 21677060 | A,C | 0.6171 | 1      | 0.046  | 0.038 | 1.5015 | 0.2204 |
| CDKAL1 | rs78714768  | 21631590 | C,T | 0.9845 | 0.8158 | 0.178  | 0.145 | 1.4995 | 0.2207 |
| CDKAL1 | rs397888201 | 21681363 | R,D | 0.4982 | 0.7168 | -0.056 | 0.046 | 1.4984 | 0.2209 |
| CDKAL1 | rs111355896 | 21649454 | I,R | 0.7486 | 0.9074 | 0.055  | 0.045 | 1.4953 | 0.2214 |
| CDKAL1 | rs149699118 | 21633666 | D,R | 0.7515 | 0.8935 | 0.055  | 0.045 | 1.4886 | 0.2224 |
| CDKAL1 | rs941990    | 21658881 | A,G | 0.6778 | 0.8561 | 0.049  | 0.041 | 1.4882 | 0.2225 |
| CDKAL1 | rs1740826   | 21651528 | G,A | 0.6892 | 0.9762 | 0.047  | 0.039 | 1.4777 | 0.2241 |
| CDKAL1 | rs6456437   | 21615443 | T,C | 0.7388 | 0.9506 | 0.05   | 0.041 | 1.4743 | 0.2247 |
| CDKAL1 | rs4710983   | 21734202 | C,T | 0.767  | 0.9462 | -0.051 | 0.042 | 1.4743 | 0.2247 |
| CDKAL1 | rs1617781   | 21608766 | A,G | 0.693  | 0.9819 | 0.047  | 0.039 | 1.4698 | 0.2254 |
| CDKAL1 | rs142355149 | 21692662 | A,C | 0.9804 | 0.36   | -0.276 | 0.228 | 1.4699 | 0.2254 |
| CDKAL1 | rs1744877   | 21651554 | T,C | 0.6891 | 0.9768 | 0.047  | 0.039 | 1.4652 | 0.2261 |

|        |             |          |     |        |        |        |       |        |        |
|--------|-------------|----------|-----|--------|--------|--------|-------|--------|--------|
| CDKAL1 | rs7755254   | 21699892 | C,T | 0.9389 | 0.6037 | -0.1   | 0.083 | 1.4538 | 0.2279 |
| CDKAL1 | rs7775517   | 21699901 | T,G | 0.9389 | 0.6039 | -0.1   | 0.083 | 1.4541 | 0.2279 |
| CDKAL1 | rs79381952  | 21699489 | T,C | 0.9398 | 0.6026 | -0.099 | 0.084 | 1.4002 | 0.2367 |
| CDKAL1 | rs60309622  | 21698465 | C,T | 0.9414 | 0.5673 | -0.103 | 0.087 | 1.3983 | 0.237  |
| CDKAL1 | rs10946462  | 21651830 | C,T | 0.6894 | 0.9828 | 0.045  | 0.039 | 1.3889 | 0.2386 |
| CDKAL1 | rs112047759 | 21699028 | T,C | 0.9395 | 0.5892 | -0.099 | 0.084 | 1.3876 | 0.2388 |
| CDKAL1 | rs112103466 | 21699063 | T,C | 0.9395 | 0.5894 | -0.099 | 0.084 | 1.3875 | 0.2388 |
| CDKAL1 | rs58699714  | 21698897 | C,T | 0.9395 | 0.5888 | -0.099 | 0.084 | 1.3842 | 0.2394 |
| CDKAL1 | rs6929483   | 21698094 | T,C | 0.9394 | 0.583  | -0.099 | 0.084 | 1.3792 | 0.2402 |
| CDKAL1 | rs6929294   | 21698041 | T,G | 0.9394 | 0.5831 | -0.099 | 0.085 | 1.378  | 0.2404 |
| CDKAL1 | rs1744887   | 21674378 | G,T | 0.9679 | 0.3275 | -0.196 | 0.168 | 1.3679 | 0.2422 |
| CDKAL1 | rs6906888   | 21697966 | G,A | 0.9391 | 0.5729 | -0.099 | 0.085 | 1.3642 | 0.2428 |
| CDKAL1 | rs10946466  | 21727456 | C,A | 0.9298 | 0.9928 | -0.084 | 0.072 | 1.363  | 0.243  |
| CDKAL1 | rs6928871   | 21697812 | T,C | 0.9391 | 0.571  | -0.099 | 0.085 | 1.3629 | 0.243  |
| CDKAL1 | rs6929045   | 21697861 | T,C | 0.9391 | 0.5712 | -0.099 | 0.085 | 1.3628 | 0.2431 |
| CDKAL1 | rs6906248   | 21697889 | A,G | 0.9391 | 0.5714 | -0.099 | 0.085 | 1.3616 | 0.2433 |
| CDKAL1 | rs76144443  | 21697748 | A,G | 0.9391 | 0.5709 | -0.099 | 0.085 | 1.3605 | 0.2434 |
| CDKAL1 | rs16885205  | 21743291 | T,C | 0.8644 | 0.5834 | 0.084  | 0.072 | 1.359  | 0.2437 |
| CDKAL1 | rs147273446 | 21638982 | C,G | 0.9761 | 0.7533 | 0.148  | 0.127 | 1.3538 | 0.2446 |
| CDKAL1 | rs148317817 | 21638986 | G,A | 0.9761 | 0.7532 | 0.148  | 0.127 | 1.3536 | 0.2447 |
| CDKAL1 | rs2759360   | 21653532 | A,G | 0.7648 | 0.8809 | 0.053  | 0.046 | 1.3511 | 0.2451 |
| CDKAL1 | rs10155733  | 21639594 | C,T | 0.9761 | 0.7534 | 0.147  | 0.127 | 1.3441 | 0.2463 |
| CDKAL1 | rs1744881   | 21657548 | G,A | 0.8047 | 0.8556 | 0.059  | 0.051 | 1.3436 | 0.2464 |
| CDKAL1 | rs10155732  | 21639540 | C,T | 0.9761 | 0.7536 | 0.147  | 0.127 | 1.3438 | 0.2464 |
| CDKAL1 | rs12189901  | 21726940 | G,A | 0.9308 | 0.9638 | -0.085 | 0.074 | 1.3407 | 0.2469 |
| CDKAL1 | rs11966675  | 21640125 | G,A | 0.9761 | 0.7522 | 0.147  | 0.127 | 1.3392 | 0.2472 |
| CDKAL1 | rs114977922 | 21638119 | C,G | 0.9762 | 0.7437 | 0.148  | 0.128 | 1.3378 | 0.2474 |
| CDKAL1 | rs138882930 | 21638300 | A,G | 0.9761 | 0.7432 | 0.148  | 0.128 | 1.3324 | 0.2484 |
| CDKAL1 | rs527350470 | 21640569 | R,D | 0.9745 | 0.7043 | 0.147  | 0.128 | 1.3325 | 0.2484 |
| CDKAL1 | rs12333154  | 21640855 | G,A | 0.976  | 0.751  | 0.147  | 0.127 | 1.3275 | 0.2492 |
| CDKAL1 | rs9295515   | 21641667 | C,T | 0.976  | 0.7495 | 0.146  | 0.127 | 1.3062 | 0.2531 |
| CDKAL1 | rs11757166  | 21652990 | C,T | 0.6883 | 0.9879 | 0.044  | 0.038 | 1.301  | 0.254  |
| CDKAL1 | rs35829440  | 21655243 | R,I | 0.602  | 0.3134 | -0.076 | 0.067 | 1.2998 | 0.2542 |
| CDKAL1 | rs9358450   | 21740882 | A,G | 0.746  | 0.858  | -0.049 | 0.043 | 1.2954 | 0.2551 |
| CDKAL1 | rs2180418   | 21690172 | A,G | 0.8397 | 0.9885 | 0.056  | 0.049 | 1.279  | 0.2581 |
| CDKAL1 | rs1972212   | 21743761 | C,T | 0.8703 | 0.5142 | 0.088  | 0.078 | 1.2686 | 0.26   |
| CDKAL1 | rs558880181 | 21699974 | R,D | 0.9241 | 0.5575 | -0.087 | 0.078 | 1.2645 | 0.2608 |
| CDKAL1 | rs1744896   | 21681103 | A,G | 0.5038 | 0.9407 | -0.045 | 0.04  | 1.2485 | 0.2638 |
| CDKAL1 | rs11433545  | 21672216 | R,I | 0.5947 | 0.6034 | -0.057 | 0.051 | 1.2479 | 0.264  |
| CDKAL1 | rs1744879   | 21652741 | A,G | 0.6892 | 0.9997 | 0.043  | 0.038 | 1.2467 | 0.2642 |
| CDKAL1 | rs75327712  | 21728829 | G,A | 0.9295 | 0.9778 | -0.081 | 0.072 | 1.2439 | 0.2647 |
| CDKAL1 | rs12332790  | 21642505 | C,T | 0.9758 | 0.7456 | 0.142  | 0.128 | 1.2435 | 0.2648 |
| CDKAL1 | rs75935729  | 21733252 | C,A | 0.9872 | 0.709  | -0.2   | 0.179 | 1.2431 | 0.2649 |
| CDKAL1 | rs68015368  | 21645499 | I,R | 0.8315 | 0.7435 | 0.063  | 0.056 | 1.2423 | 0.265  |
| CDKAL1 | rs1740857   | 21681617 | T,G | 0.5067 | 0.8693 | -0.046 | 0.042 | 1.2402 | 0.2654 |

|        |             |          |     |        |        |        |       |        |        |
|--------|-------------|----------|-----|--------|--------|--------|-------|--------|--------|
| CDKAL1 | rs1740856   | 21681223 | G,A | 0.5041 | 0.9379 | -0.044 | 0.04  | 1.2401 | 0.2655 |
| CDKAL1 | rs74831068  | 21693978 | T,C | 0.8189 | 0.778  | -0.059 | 0.053 | 1.2398 | 0.2655 |
| CDKAL1 | rs11961107  | 21642740 | G,A | 0.9758 | 0.7454 | 0.142  | 0.128 | 1.2391 | 0.2656 |
| CDKAL1 | rs147596047 | 21733524 | R,D | 0.9872 | 0.709  | -0.2   | 0.179 | 1.2392 | 0.2656 |
| CDKAL1 | rs77258728  | 21734254 | G,A | 0.9872 | 0.709  | -0.2   | 0.179 | 1.2387 | 0.2657 |
| CDKAL1 | rs150184400 | 21642793 | T,C | 0.9758 | 0.7454 | 0.142  | 0.128 | 1.2379 | 0.2659 |
| CDKAL1 | rs1744893   | 21680746 | T,C | 0.5019 | 0.987  | -0.043 | 0.039 | 1.2372 | 0.266  |
| CDKAL1 | rs1740859   | 21682298 | C,T | 0.5072 | 0.8627 | -0.046 | 0.042 | 1.2356 | 0.2663 |
| CDKAL1 | rs1740855   | 21680782 | C,T | 0.5021 | 0.9879 | -0.043 | 0.039 | 1.2347 | 0.2665 |
| CDKAL1 | rs1740858   | 21682180 | C,T | 0.507  | 0.8636 | -0.046 | 0.042 | 1.2344 | 0.2665 |
| CDKAL1 | rs149746556 | 21731479 | R,D | 0.9872 | 0.7098 | -0.198 | 0.179 | 1.2254 | 0.2683 |
| CDKAL1 | rs78584490  | 21732145 | C,T | 0.9872 | 0.7096 | -0.198 | 0.179 | 1.2256 | 0.2683 |
| CDKAL1 | rs570404489 | 21689796 | R,D | 0.7798 | 0.3015 | 0.086  | 0.077 | 1.2239 | 0.2686 |
| CDKAL1 | rs9460656   | 21643907 | A,G | 0.9758 | 0.7442 | 0.141  | 0.128 | 1.2113 | 0.2711 |
| CDKAL1 | rs9466133   | 21643948 | C,T | 0.9757 | 0.7442 | 0.141  | 0.128 | 1.2103 | 0.2713 |
| CDKAL1 | rs9466169   | 21746181 | A,G | 0.8659 | 0.4166 | 0.094  | 0.086 | 1.2071 | 0.2719 |
| CDKAL1 | rs139032454 | 21644326 | A,C | 0.9757 | 0.7441 | 0.14   | 0.128 | 1.2006 | 0.2732 |
| CDKAL1 | rs1744894   | 21680886 | T,C | 0.4962 | 0.9953 | -0.042 | 0.039 | 1.1902 | 0.2753 |
| CDKAL1 | rs1744880   | 21653046 | A,G | 0.6868 | 0.9845 | 0.042  | 0.038 | 1.1881 | 0.2757 |
| CDKAL1 | rs112101248 | 21683625 | T,C | 0.9893 | 0.5442 | 0.227  | 0.209 | 1.1855 | 0.2762 |
| CDKAL1 | rs1744895   | 21680899 | G,C | 0.4958 | 1      | -0.042 | 0.039 | 1.1818 | 0.277  |
| CDKAL1 | rs78937245  | 21738761 | C,T | 0.9864 | 0.6447 | -0.197 | 0.182 | 1.1749 | 0.2784 |
| CDKAL1 | rs182063949 | 21738643 | T,A | 0.9864 | 0.6453 | -0.197 | 0.182 | 1.1736 | 0.2787 |
| CDKAL1 | rs7763048   | 21681780 | G,A | 0.4974 | 0.8635 | -0.045 | 0.041 | 1.1548 | 0.2825 |
| CDKAL1 | rs9466153   | 21700048 | C,T | 0.9445 | 0.5887 | -0.095 | 0.088 | 1.1546 | 0.2826 |
| CDKAL1 | rs12333123  | 21640660 | G,A | 0.9848 | 0.7705 | 0.166  | 0.155 | 1.148  | 0.284  |
| CDKAL1 | rs145952396 | 21677173 | C,T | 0.9854 | 0.5637 | -0.205 | 0.192 | 1.1418 | 0.2853 |
| CDKAL1 | rs150235785 | 21638293 | G,A | 0.9849 | 0.7598 | 0.167  | 0.156 | 1.1389 | 0.2859 |
| CDKAL1 | rs1744892   | 21680206 | A,G | 0.4953 | 0.9943 | -0.041 | 0.039 | 1.13   | 0.2878 |
| CDKAL1 | rs146516474 | 21554348 | C,T | 0.9266 | 0.8769 | -0.071 | 0.067 | 1.1258 | 0.2887 |
| CDKAL1 | rs67418443  | 21554442 | C,T | 0.9266 | 0.876  | -0.071 | 0.067 | 1.1251 | 0.2888 |
| CDKAL1 | rs9466164   | 21723538 | A,G | 0.8284 | 0.9494 | 0.055  | 0.052 | 1.1093 | 0.2922 |
| CDKAL1 | rs530398575 | 21733586 | R,I | 0.8629 | 0.4934 | -0.075 | 0.073 | 1.0627 | 0.3026 |
| CDKAL1 | rs78825652  | 21609539 | I,R | 0.6732 | 0.9671 | 0.039  | 0.038 | 1.055  | 0.3044 |
| CDKAL1 | rs545611803 | 21688770 | R,I | 0.8158 | 0.533  | -0.063 | 0.063 | 1.0052 | 0.3161 |
| CDKAL1 | rs4712623   | 21688978 | C,T | 0.638  | 0.848  | 0.039  | 0.04  | 0.9787 | 0.3225 |
| CDKAL1 | rs12525631  | 21730840 | C,T | 0.8794 | 0.9968 | -0.054 | 0.055 | 0.9773 | 0.3229 |
| CDKAL1 | rs138380902 | 21731187 | R,D | 0.9079 | 0.9299 | -0.062 | 0.063 | 0.9686 | 0.325  |
| CDKAL1 | rs139419250 | 21696871 | R,I | 0.9475 | 0.5307 | -0.09  | 0.092 | 0.9491 | 0.3299 |
| CDKAL1 | rs6900676   | 21697176 | A,G | 0.9471 | 0.5384 | -0.089 | 0.091 | 0.9449 | 0.331  |
| CDKAL1 | rs6900485   | 21697055 | A,T | 0.9471 | 0.5382 | -0.089 | 0.091 | 0.9429 | 0.3315 |
| CDKAL1 | rs9460670   | 21731138 | C,A | 0.877  | 0.9736 | -0.053 | 0.055 | 0.9254 | 0.3361 |
| CDKAL1 | rs562901644 | 21554922 | R,D | 0.9157 | 0.7168 | -0.067 | 0.07  | 0.9111 | 0.3398 |
| CDKAL1 | rs145778004 | 21696926 | R,I | 0.9468 | 0.5319 | -0.087 | 0.092 | 0.91   | 0.3401 |
| CDKAL1 | rs5874829   | 21738740 | R,I | 0.8074 | 0.7675 | 0.05   | 0.053 | 0.8966 | 0.3437 |

|        |             |          |     |        |        |        |       |        |        |
|--------|-------------|----------|-----|--------|--------|--------|-------|--------|--------|
| CDKAL1 | rs146150526 | 21575243 | T,C | 0.9263 | 0.5346 | 0.082  | 0.089 | 0.8484 | 0.357  |
| CDKAL1 | rs548416728 | 21647978 | R,D | 0.9747 | 0.6618 | 0.125  | 0.136 | 0.8421 | 0.3588 |
| CDKAL1 | rs113196987 | 21575419 | A,G | 0.9232 | 0.5162 | 0.08   | 0.089 | 0.8159 | 0.3664 |
| CDKAL1 | rs2144867   | 21689100 | C,T | 0.9874 | 0.3281 | -0.245 | 0.271 | 0.8157 | 0.3665 |
| CDKAL1 | rs1744882   | 21657561 | T,G | 0.7003 | 0.8473 | 0.038  | 0.043 | 0.8141 | 0.3669 |
| CDKAL1 | rs548873349 | 21736947 | R,I | 0.8405 | 0.7508 | -0.05  | 0.055 | 0.8138 | 0.367  |
| CDKAL1 | rs73374447  | 21636151 | C,T | 0.9753 | 0.3    | -0.174 | 0.194 | 0.8073 | 0.3689 |
| CDKAL1 | rs7772337   | 21726278 | C,T | 0.8256 | 0.9612 | 0.046  | 0.051 | 0.8048 | 0.3697 |
| CDKAL1 | rs71563995  | 21676342 | A,G | 0.9697 | 0.7188 | -0.112 | 0.125 | 0.8007 | 0.3709 |
| CDKAL1 | rs547687648 | 21729656 | R,I | 0.7892 | 0.8727 | -0.042 | 0.047 | 0.8004 | 0.371  |
| CDKAL1 | rs2749688   | 21658487 | G,C | 0.6992 | 0.8356 | 0.038  | 0.043 | 0.787  | 0.375  |
| CDKAL1 | rs80177376  | 21744978 | C,T | 0.9048 | 0.3545 | -0.09  | 0.102 | 0.7871 | 0.375  |
| CDKAL1 | rs7739235   | 21609345 | A,T | 0.9799 | 0.962  | -0.114 | 0.128 | 0.7832 | 0.3762 |
| CDKAL1 | rs199690993 | 21646009 | R,D | 0.9762 | 0.3058 | -0.172 | 0.196 | 0.7747 | 0.3788 |
| CDKAL1 | rs117061311 | 21683546 | G,A | 0.9853 | 0.4203 | -0.195 | 0.222 | 0.7695 | 0.3804 |
| CDKAL1 | rs557872691 | 21603474 | R,D | 0.8825 | 0.5572 | 0.062  | 0.072 | 0.7569 | 0.3843 |
| CDKAL1 | rs1740828   | 21649085 | A,G | 0.5436 | 0.4642 | 0.046  | 0.054 | 0.7404 | 0.3895 |
| CDKAL1 | rs34954830  | 21632488 | R,I | 0.9584 | 0.5469 | 0.097  | 0.112 | 0.7394 | 0.3899 |
| CDKAL1 | rs111684701 | 21608562 | C,T | 0.9809 | 0.9509 | -0.114 | 0.133 | 0.7314 | 0.3924 |
| CDKAL1 | rs2749681   | 21683792 | A,G | 0.5085 | 0.771  | -0.037 | 0.044 | 0.7287 | 0.3933 |
| CDKAL1 | rs112892524 | 21608321 | C,T | 0.981  | 0.9464 | -0.113 | 0.133 | 0.7284 | 0.3934 |
| CDKAL1 | rs7740142   | 21609635 | G,A | 0.9809 | 0.955  | -0.113 | 0.132 | 0.7274 | 0.3937 |
| CDKAL1 | rs13215657  | 21683714 | C,T | 0.511  | 0.7765 | -0.037 | 0.044 | 0.7168 | 0.3972 |
| CDKAL1 | rs1740853   | 21684065 | G,A | 0.5152 | 0.7328 | -0.038 | 0.045 | 0.7164 | 0.3973 |
| CDKAL1 | rs113064891 | 21606092 | R,I | 0.9811 | 0.9369 | -0.113 | 0.134 | 0.7143 | 0.398  |
| CDKAL1 | rs13219086  | 21683929 | G,C | 0.5137 | 0.7654 | -0.037 | 0.044 | 0.712  | 0.3988 |
| CDKAL1 | rs9466168   | 21734750 | C,T | 0.8215 | 0.9954 | 0.04   | 0.048 | 0.7097 | 0.3996 |
| CDKAL1 | rs12200574  | 21683353 | G,A | 0.5092 | 0.842  | -0.035 | 0.042 | 0.7063 | 0.4007 |
| CDKAL1 | rs145825998 | 21695945 | T,G | 0.9899 | 0.5601 | -0.196 | 0.235 | 0.6983 | 0.4034 |
| CDKAL1 | rs115395409 | 21696639 | C,T | 0.99   | 0.5674 | -0.196 | 0.234 | 0.6978 | 0.4035 |
| CDKAL1 | rs138691949 | 21653247 | A,T | 0.9812 | 0.5466 | -0.145 | 0.175 | 0.6897 | 0.4063 |
| CDKAL1 | rs62403977  | 21725337 | C,T | 0.8232 | 0.9705 | 0.042  | 0.05  | 0.6889 | 0.4065 |
| CDKAL1 | rs73737557  | 21570448 | T,C | 0.9333 | 0.4619 | 0.084  | 0.101 | 0.6882 | 0.4068 |
| CDKAL1 | rs13220312  | 21671856 | A,G | 0.9734 | 0.7398 | -0.107 | 0.129 | 0.6877 | 0.4069 |
| CDKAL1 | rs60048426  | 21556513 | G,A | 0.947  | 0.5576 | -0.078 | 0.094 | 0.6866 | 0.4073 |
| CDKAL1 | rs71563994  | 21668435 | T,C | 0.9731 | 0.7255 | -0.107 | 0.129 | 0.6849 | 0.4079 |
| CDKAL1 | rs35922627  | 21667988 | A,T | 0.973  | 0.7238 | -0.107 | 0.129 | 0.683  | 0.4086 |
| CDKAL1 | rs190176895 | 21629550 | C,A | 0.9877 | 0.7487 | 0.167  | 0.203 | 0.6803 | 0.4095 |
| CDKAL1 | rs35210528  | 21667781 | T,C | 0.9732 | 0.7254 | -0.107 | 0.13  | 0.6784 | 0.4101 |
| CDKAL1 | rs77625474  | 21604127 | G,T | 0.9308 | 0.9762 | 0.058  | 0.07  | 0.6781 | 0.4102 |
| CDKAL1 | rs11965374  | 21629739 | T,G | 0.9653 | 0.7623 | 0.092  | 0.112 | 0.671  | 0.4127 |
| CDKAL1 | rs62404141  | 21614140 | G,A | 0.8281 | 0.9622 | 0.041  | 0.05  | 0.6647 | 0.4149 |
| CDKAL1 | rs35528538  | 21613493 | R,D | 0.8281 | 0.9642 | 0.041  | 0.05  | 0.6644 | 0.415  |
| CDKAL1 | rs9466125   | 21601156 | A,G | 0.9295 | 0.9574 | 0.058  | 0.071 | 0.6609 | 0.4162 |
| CDKAL1 | rs9358442   | 21573637 | G,A | 0.7034 | 0.4581 | 0.047  | 0.058 | 0.6551 | 0.4183 |

|        |             |          |     |        |        |        |       |        |        |
|--------|-------------|----------|-----|--------|--------|--------|-------|--------|--------|
| CDKAL1 | rs77394991  | 21735578 | C,T | 0.8447 | 0.9263 | -0.04  | 0.05  | 0.6476 | 0.421  |
| CDKAL1 | rs201995762 | 21706002 | R,I | 0.9873 | 0.4393 | -0.191 | 0.238 | 0.6434 | 0.4225 |
| CDKAL1 | rs150435139 | 21707497 | A,G | 0.9874 | 0.4469 | -0.19  | 0.237 | 0.6403 | 0.4236 |
| CDKAL1 | rs13211544  | 21619214 | C,A | 0.8478 | 0.3133 | -0.069 | 0.087 | 0.6393 | 0.424  |
| CDKAL1 | rs4712625   | 21699342 | G,A | 0.8761 | 0.9937 | -0.045 | 0.056 | 0.638  | 0.4244 |
| CDKAL1 | rs9348484   | 21731460 | C,G | 0.93   | 0.9619 | -0.058 | 0.073 | 0.629  | 0.4277 |
| CDKAL1 | rs116779637 | 21718919 | G,T | 0.9886 | 0.7935 | 0.143  | 0.18  | 0.629  | 0.4277 |
| CDKAL1 | rs9358448   | 21731736 | G,A | 0.9305 | 0.9625 | -0.058 | 0.073 | 0.6232 | 0.4299 |
| CDKAL1 | rs111411936 | 21626246 | G,A | 0.9877 | 0.7672 | 0.159  | 0.201 | 0.6227 | 0.43   |
| CDKAL1 | rs112039884 | 21729100 | C,T | 0.9274 | 0.9676 | -0.056 | 0.072 | 0.6153 | 0.4328 |
| CDKAL1 | rs147960757 | 21606492 | G,T | 0.9772 | 0.8203 | 0.113  | 0.144 | 0.6142 | 0.4332 |
| CDKAL1 | rs79693897  | 21695822 | R,D | 0.6627 | 0.717  | 0.036  | 0.046 | 0.6119 | 0.4341 |
| CDKAL1 | rs146269383 | 21601263 | G,A | 0.9772 | 0.8168 | 0.112  | 0.144 | 0.6107 | 0.4345 |
| CDKAL1 | rs117971178 | 21674146 | C,T | 0.9852 | 0.5427 | -0.15  | 0.192 | 0.6074 | 0.4358 |
| CDKAL1 | rs6921422   | 21600523 | C,A | 0.9308 | 0.9908 | 0.055  | 0.071 | 0.6001 | 0.4386 |
| CDKAL1 | rs11281983  | 21600430 | R,I | 0.9309 | 0.9934 | 0.055  | 0.071 | 0.5983 | 0.4392 |
| CDKAL1 | rs13219202  | 21683982 | G,A | 0.5273 | 0.7259 | -0.035 | 0.046 | 0.5977 | 0.4394 |
| CDKAL1 | rs189742413 | 21683505 | C,T | 0.984  | 0.4632 | -0.135 | 0.175 | 0.5929 | 0.4413 |
| CDKAL1 | rs9466124   | 21599700 | A,G | 0.9309 | 0.9964 | 0.054  | 0.071 | 0.589  | 0.4428 |
| CDKAL1 | rs540918539 | 21717464 | R,D | 0.9882 | 0.804  | 0.136  | 0.177 | 0.5872 | 0.4435 |
| CDKAL1 | rs16885105  | 21598981 | C,T | 0.9309 | 0.9869 | 0.054  | 0.071 | 0.5862 | 0.4439 |
| CDKAL1 | rs9466158   | 21717309 | T,C | 0.7892 | 0.921  | 0.035  | 0.046 | 0.5822 | 0.4455 |
| CDKAL1 | rs79949484  | 21728966 | G,A | 0.9319 | 0.8819 | -0.059 | 0.077 | 0.5773 | 0.4474 |
| CDKAL1 | rs113975012 | 21712110 | A,T | 0.9843 | 0.5172 | -0.158 | 0.21  | 0.5619 | 0.4535 |
| CDKAL1 | rs7762989   | 21624153 | C,T | 0.9883 | 0.8214 | 0.151  | 0.202 | 0.5574 | 0.4553 |
| CDKAL1 | rs78523587  | 21614133 | G,A | 0.9764 | 0.7872 | 0.106  | 0.144 | 0.5338 | 0.465  |
| CDKAL1 | rs9460666   | 21726380 | G,A | 0.9296 | 0.3512 | 0.083  | 0.113 | 0.5319 | 0.4658 |
| CDKAL1 | rs9466163   | 21723532 | C,T | 0.809  | 0.9768 | 0.035  | 0.048 | 0.5307 | 0.4663 |
| CDKAL1 | rs74785728  | 21611723 | G,A | 0.9819 | 0.9332 | -0.1   | 0.138 | 0.5226 | 0.4697 |
| CDKAL1 | rs6925679   | 21724480 | A,G | 0.8086 | 1      | 0.034  | 0.048 | 0.5193 | 0.4711 |
| CDKAL1 | rs9368325   | 21577508 | C,T | 0.8604 | 0.347  | 0.063  | 0.088 | 0.5191 | 0.4712 |
| CDKAL1 | rs9460665   | 21724144 | G,A | 0.8084 | 1      | 0.034  | 0.048 | 0.5175 | 0.4719 |
| CDKAL1 | rs7770799   | 21553258 | A,C | 0.9337 | 0.9722 | -0.05  | 0.069 | 0.5153 | 0.4729 |
| CDKAL1 | rs9466159   | 21721313 | A,G | 0.8227 | 0.9323 | 0.037  | 0.052 | 0.5105 | 0.4749 |
| CDKAL1 | rs6924745   | 21693837 | C,T | 0.8421 | 0.8514 | 0.039  | 0.054 | 0.5045 | 0.4775 |
| CDKAL1 | rs9466165   | 21724322 | T,C | 0.8089 | 0.9953 | 0.034  | 0.048 | 0.5032 | 0.4781 |
| CDKAL1 | rs112395953 | 21727909 | A,C | 0.885  | 0.9741 | -0.04  | 0.056 | 0.5009 | 0.4791 |
| CDKAL1 | rs79846403  | 21723244 | C,T | 0.8348 | 0.8403 | 0.039  | 0.055 | 0.494  | 0.4822 |
| CDKAL1 | rs141253251 | 21567552 | G,A | 0.9772 | 0.4147 | 0.126  | 0.181 | 0.489  | 0.4844 |
| CDKAL1 | rs9460664   | 21723621 | G,A | 0.8102 | 0.9858 | 0.034  | 0.048 | 0.4865 | 0.4855 |
| CDKAL1 | rs12191413  | 21740465 | A,T | 0.7737 | 0.8456 | -0.032 | 0.047 | 0.4845 | 0.4864 |
| CDKAL1 | rs114981716 | 21562453 | G,A | 0.977  | 0.3896 | 0.129  | 0.186 | 0.4837 | 0.4867 |
| CDKAL1 | rs149455365 | 21553549 | R,D | 0.9357 | 0.9431 | -0.049 | 0.07  | 0.4793 | 0.4888 |
| CDKAL1 | rs6926491   | 21724670 | G,A | 0.8091 | 0.9926 | 0.033  | 0.048 | 0.4741 | 0.4911 |
| CDKAL1 | rs79002033  | 21706995 | C,T | 0.9739 | 0.6771 | -0.093 | 0.135 | 0.4727 | 0.4918 |



|        |             |          |     |        |        |        |       |        |        |
|--------|-------------|----------|-----|--------|--------|--------|-------|--------|--------|
| CDKAL1 | rs9460659   | 21696569 | G,C | 0.6689 | 0.7266 | 0.031  | 0.046 | 0.4712 | 0.4924 |
| CDKAL1 | rs116216476 | 21700308 | T,C | 0.9886 | 0.6467 | 0.131  | 0.191 | 0.4706 | 0.4927 |
| CDKAL1 | rs61215435  | 21721256 | C,T | 0.9893 | 0.7083 | 0.129  | 0.189 | 0.4651 | 0.4952 |
| CDKAL1 | rs147045541 | 21675767 | C,T | 0.9834 | 0.576  | -0.119 | 0.175 | 0.4642 | 0.4957 |
| CDKAL1 | rs9460668   | 21727929 | C,G | 0.8216 | 0.9705 | 0.034  | 0.05  | 0.4592 | 0.498  |
| CDKAL1 | rs7760462   | 21730877 | G,C | 0.4165 | 0.9846 | 0.024  | 0.036 | 0.4564 | 0.4993 |
| CDKAL1 | rs7739666   | 21718260 | T,C | 0.9818 | 0.939  | 0.084  | 0.124 | 0.4553 | 0.4998 |
| CDKAL1 | rs34197291  | 21611277 | R,D | 0.7729 | 0.7368 | 0.035  | 0.051 | 0.452  | 0.5014 |
| CDKAL1 | rs149768565 | 21719941 | R,D | 0.9754 | 0.6872 | 0.084  | 0.125 | 0.4516 | 0.5016 |
| CDKAL1 | rs7757467   | 21718123 | C,T | 0.9813 | 0.9676 | 0.081  | 0.122 | 0.446  | 0.5042 |
| CDKAL1 | rs9348480   | 21617782 | G,A | 0.7922 | 0.9408 | 0.03   | 0.045 | 0.4442 | 0.5051 |
| CDKAL1 | rs76501983  | 21631411 | G,A | 0.9854 | 0.8228 | 0.116  | 0.174 | 0.4425 | 0.5059 |
| CDKAL1 | rs1740825   | 21653689 | T,C | 0.7477 | 0.8767 | 0.03   | 0.045 | 0.4413 | 0.5065 |
| CDKAL1 | rs7757232   | 21717818 | G,A | 0.9819 | 0.9404 | 0.082  | 0.124 | 0.4323 | 0.5108 |
| CDKAL1 | rs4710982   | 21733835 | G,C | 0.8653 | 0.9343 | -0.035 | 0.054 | 0.4315 | 0.5112 |
| CDKAL1 | rs80035391  | 21685357 | G,A | 0.8973 | 0.5163 | -0.053 | 0.081 | 0.4303 | 0.5119 |
| CDKAL1 | rs150997476 | 21663402 | A,T | 0.9893 | 0.6383 | 0.155  | 0.238 | 0.4276 | 0.5132 |
| CDKAL1 | rs7753199   | 21717706 | G,A | 0.9819 | 0.9391 | 0.081  | 0.124 | 0.4271 | 0.5134 |
| CDKAL1 | rs7738506   | 21702690 | A,T | 0.9888 | 0.6716 | 0.124  | 0.19  | 0.4265 | 0.5137 |
| CDKAL1 | rs9350368   | 21562144 | A,G | 0.6823 | 0.3726 | 0.039  | 0.059 | 0.4255 | 0.5142 |
| CDKAL1 | rs528217121 | 21702677 | R,D | 0.9888 | 0.6785 | 0.123  | 0.189 | 0.4222 | 0.5159 |
| CDKAL1 | rs143393812 | 21633911 | C,T | 0.9816 | 0.5752 | -0.112 | 0.172 | 0.4195 | 0.5172 |
| CDKAL1 | rs2328627   | 21714362 | G,A | 0.9889 | 0.782  | 0.118  | 0.183 | 0.4178 | 0.5181 |
| CDKAL1 | rs6933476   | 21720156 | G,A | 0.9819 | 0.8936 | 0.082  | 0.126 | 0.417  | 0.5184 |
| CDKAL1 | rs7772163   | 21726011 | G,C | 0.8088 | 0.9857 | 0.031  | 0.048 | 0.4154 | 0.5193 |
| CDKAL1 | rs116598598 | 21654884 | A,T | 0.983  | 0.5411 | -0.118 | 0.186 | 0.4071 | 0.5234 |
| CDKAL1 | rs2876599   | 21714103 | C,G | 0.9889 | 0.7808 | 0.116  | 0.183 | 0.4037 | 0.5252 |
| CDKAL1 | rs78098947  | 21713740 | C,T | 0.989  | 0.7788 | 0.116  | 0.183 | 0.4015 | 0.5263 |
| CDKAL1 | rs140066406 | 21728813 | R,I | 0.8701 | 0.9744 | -0.034 | 0.053 | 0.3982 | 0.528  |
| CDKAL1 | rs9460671   | 21731289 | G,C | 0.41   | 0.9868 | 0.023  | 0.036 | 0.3857 | 0.5345 |
| CDKAL1 | rs71563992  | 21655825 | G,T | 0.9888 | 0.8713 | -0.114 | 0.185 | 0.3776 | 0.5389 |
| CDKAL1 | rs78870816  | 21665363 | C,T | 0.9434 | 0.7804 | 0.053  | 0.087 | 0.3703 | 0.5428 |
| CDKAL1 | rs6456443   | 21716233 | G,A | 0.9818 | 0.9202 | 0.076  | 0.125 | 0.3692 | 0.5435 |
| CDKAL1 | rs77518511  | 21690391 | A,G | 0.9839 | 0.4553 | 0.126  | 0.208 | 0.3659 | 0.5452 |
| CDKAL1 | rs1555529   | 21691704 | A,G | 0.7822 | 0.9942 | 0.026  | 0.044 | 0.3612 | 0.5479 |
| CDKAL1 | rs76062205  | 21666427 | C,T | 0.9438 | 0.7852 | 0.052  | 0.087 | 0.3606 | 0.5481 |
| CDKAL1 | rs80264536  | 21666345 | T,G | 0.9437 | 0.7836 | 0.052  | 0.087 | 0.3553 | 0.5511 |
| CDKAL1 | rs78502915  | 21591248 | G,T | 0.9567 | 0.6759 | 0.063  | 0.108 | 0.3477 | 0.5554 |
| CDKAL1 | rs76428292  | 21629756 | C,A | 0.974  | 0.7112 | 0.085  | 0.144 | 0.3468 | 0.5559 |
| CDKAL1 | rs111928481 | 21648542 | T,A | 0.9738 | 0.8848 | 0.068  | 0.116 | 0.3452 | 0.5568 |
| CDKAL1 | rs9358441   | 21565339 | T,C | 0.7025 | 0.3571 | 0.037  | 0.063 | 0.3451 | 0.5569 |
| CDKAL1 | rs34810044  | 21718703 | R,D | 0.7721 | 0.9072 | 0.025  | 0.043 | 0.3383 | 0.5608 |
| CDKAL1 | rs117804382 | 21656810 | C,T | 0.9855 | 0.5625 | -0.112 | 0.193 | 0.3363 | 0.562  |
| CDKAL1 | rs78265086  | 21720541 | T,C | 0.9826 | 0.8636 | 0.074  | 0.129 | 0.3299 | 0.5657 |
| CDKAL1 | rs113989215 | 21665766 | A,C | 0.9131 | 0.855  | 0.036  | 0.063 | 0.3278 | 0.5669 |

|        |             |          |     |        |        |        |       |        |        |
|--------|-------------|----------|-----|--------|--------|--------|-------|--------|--------|
| CDKAL1 | rs543173991 | 21629474 | T,A | 0.9884 | 0.7664 | 0.118  | 0.206 | 0.3277 | 0.567  |
| CDKAL1 | rs112243204 | 21582142 | T,C | 0.9498 | 0.5703 | 0.058  | 0.101 | 0.3265 | 0.5677 |
| CDKAL1 | rs9368332   | 21731094 | G,A | 0.4156 | 0.9974 | 0.02   | 0.036 | 0.3257 | 0.5682 |
| CDKAL1 | rs140643662 | 21664544 | G,A | 0.9855 | 0.5752 | -0.109 | 0.191 | 0.3255 | 0.5683 |
| CDKAL1 | rs116878740 | 21665291 | A,G | 0.9855 | 0.5757 | -0.109 | 0.191 | 0.3252 | 0.5685 |
| CDKAL1 | rs117537289 | 21661595 | C,T | 0.9854 | 0.5671 | -0.109 | 0.191 | 0.3225 | 0.5701 |
| CDKAL1 | rs9368326   | 21590104 | A,G | 0.8056 | 0.5535 | 0.035  | 0.061 | 0.319  | 0.5722 |
| CDKAL1 | rs12206842  | 21734489 | A,T | 0.9372 | 1      | -0.042 | 0.075 | 0.3178 | 0.5729 |
| CDKAL1 | rs9358449   | 21732383 | G,A | 0.937  | 0.9915 | -0.042 | 0.075 | 0.3176 | 0.573  |
| CDKAL1 | rs7451817   | 21735497 | A,C | 0.9341 | 0.9124 | -0.043 | 0.077 | 0.3121 | 0.5764 |
| CDKAL1 | rs4616978   | 21606129 | G,A | 0.8111 | 0.9353 | 0.027  | 0.048 | 0.3098 | 0.5778 |
| CDKAL1 | rs4712633   | 21738249 | A,G | 0.8598 | 1      | -0.029 | 0.051 | 0.3081 | 0.5788 |
| CDKAL1 | rs7739775   | 21727465 | C,T | 0.87   | 0.9769 | -0.029 | 0.053 | 0.3026 | 0.5823 |
| CDKAL1 | rs77401992  | 21579608 | A,G | 0.9474 | 0.5364 | 0.056  | 0.102 | 0.3012 | 0.5831 |
| CDKAL1 | rs74329629  | 21583401 | G,A | 0.9656 | 0.5138 | 0.076  | 0.139 | 0.3012 | 0.5832 |
| CDKAL1 | rs9460658   | 21684193 | C,T | 0.9792 | 0.347  | -0.12  | 0.218 | 0.3007 | 0.5835 |
| CDKAL1 | rs78471563  | 21679073 | T,A | 0.9895 | 0.9404 | -0.1   | 0.183 | 0.3001 | 0.5838 |
| CDKAL1 | rs75228175  | 21579117 | C,T | 0.9479 | 0.5358 | 0.056  | 0.102 | 0.2994 | 0.5843 |
| CDKAL1 | rs112117324 | 21606452 | C,T | 0.9756 | 0.8592 | -0.064 | 0.117 | 0.2986 | 0.5848 |
| CDKAL1 | rs79169915  | 21607457 | G,A | 0.9882 | 0.848  | -0.106 | 0.198 | 0.2888 | 0.591  |
| CDKAL1 | rs7740486   | 21714797 | A,G | 0.9818 | 0.8978 | 0.068  | 0.126 | 0.2881 | 0.5915 |
| CDKAL1 | rs549313068 | 21638634 | R,D | 0.9854 | 0.7268 | 0.099  | 0.185 | 0.2837 | 0.5943 |
| CDKAL1 | rs58919806  | 21570038 | G,A | 0.8921 | 0.397  | 0.043  | 0.081 | 0.2804 | 0.5964 |
| CDKAL1 | rs73376077  | 21720504 | C,T | 0.7969 | 0.9025 | 0.026  | 0.048 | 0.2797 | 0.5969 |
| CDKAL1 | rs60336041  | 21714991 | A,C | 0.9818 | 0.9007 | 0.066  | 0.126 | 0.2782 | 0.5979 |
| CDKAL1 | rs7744078   | 21727822 | G,C | 0.4006 | 0.9944 | 0.019  | 0.037 | 0.2758 | 0.5994 |
| CDKAL1 | rs7764209   | 21727755 | A,T | 0.4006 | 0.9953 | 0.019  | 0.037 | 0.2756 | 0.5996 |
| CDKAL1 | rs7740084   | 21727531 | A,G | 0.4005 | 0.9983 | 0.019  | 0.036 | 0.2732 | 0.6012 |
| CDKAL1 | rs571632729 | 21726382 | R,I | 0.896  | 0.3926 | -0.048 | 0.093 | 0.2717 | 0.6022 |
| CDKAL1 | rs1322883   | 21720796 | A,G | 0.5867 | 0.9164 | 0.019  | 0.037 | 0.2692 | 0.6039 |
| CDKAL1 | rs12528487  | 21735354 | A,G | 0.8629 | 0.9338 | -0.028 | 0.054 | 0.2691 | 0.604  |
| CDKAL1 | rs143636013 | 21649787 | G,C | 0.9413 | 0.7828 | 0.045  | 0.088 | 0.2655 | 0.6063 |
| CDKAL1 | rs142641808 | 21677158 | C,T | 0.9656 | 0.7625 | -0.063 | 0.123 | 0.2652 | 0.6066 |
| CDKAL1 | rs111412021 | 21606278 | T,C | 0.9882 | 0.8163 | -0.105 | 0.205 | 0.2616 | 0.609  |
| CDKAL1 | rs56004640  | 21716262 | A,G | 0.8113 | 0.9096 | 0.026  | 0.05  | 0.2614 | 0.6092 |
| CDKAL1 | rs78030412  | 21631511 | T,C | 0.9731 | 0.7032 | 0.072  | 0.142 | 0.259  | 0.6108 |
| CDKAL1 | rs77708052  | 21605375 | C,T | 0.98   | 0.7948 | 0.079  | 0.158 | 0.2521 | 0.6156 |
| CDKAL1 | rs5874828   | 21692948 | R,D | 0.8716 | 0.725  | -0.031 | 0.063 | 0.2481 | 0.6184 |
| CDKAL1 | rs185494084 | 21636537 | T,C | 0.9884 | 0.4475 | -0.138 | 0.279 | 0.2461 | 0.6198 |
| CDKAL1 | rs11968460  | 21718604 | G,A | 0.8056 | 0.9024 | 0.025  | 0.05  | 0.2452 | 0.6205 |
| CDKAL1 | rs75051132  | 21589799 | T,A | 0.98   | 0.6365 | 0.087  | 0.177 | 0.2448 | 0.6208 |
| CDKAL1 | rs74323084  | 21645152 | C,G | 0.9857 | 0.7691 | 0.088  | 0.179 | 0.2428 | 0.6222 |
| CDKAL1 | rs79232286  | 21689146 | G,A | 0.8483 | 0.7428 | -0.029 | 0.059 | 0.2422 | 0.6226 |
| CDKAL1 | rs7746995   | 21686064 | G,A | 0.9859 | 0.4629 | 0.107  | 0.221 | 0.2358 | 0.6272 |
| CDKAL1 | rs149385127 | 21642947 | G,A | 0.9849 | 0.723  | 0.087  | 0.18  | 0.2351 | 0.6278 |

|        |             |          |     |        |        |        |       |        |        |
|--------|-------------|----------|-----|--------|--------|--------|-------|--------|--------|
| CDKAL1 | rs75629001  | 21689221 | C,T | 0.8716 | 0.708  | -0.03  | 0.064 | 0.2276 | 0.6333 |
| CDKAL1 | rs6933506   | 21673857 | T,C | 0.9717 | 0.871  | 0.052  | 0.11  | 0.2254 | 0.6349 |
| CDKAL1 | rs1973987   | 21687659 | G,T | 0.8711 | 0.6956 | -0.03  | 0.064 | 0.2249 | 0.6353 |
| CDKAL1 | rs78686872  | 21566786 | T,C | 0.9087 | 0.4686 | 0.038  | 0.08  | 0.2239 | 0.6361 |
| CDKAL1 | rs78225455  | 21566785 | T,A | 0.9087 | 0.4686 | 0.038  | 0.08  | 0.2237 | 0.6363 |
| CDKAL1 | rs76257188  | 21688091 | T,G | 0.8712 | 0.7018 | -0.03  | 0.064 | 0.2217 | 0.6378 |
| CDKAL1 | rs59187080  | 21668625 | G,A | 0.966  | 0.7875 | 0.048  | 0.103 | 0.2205 | 0.6387 |
| CDKAL1 | rs111526226 | 21567385 | T,C | 0.968  | 0.4673 | -0.064 | 0.137 | 0.219  | 0.6398 |
| CDKAL1 | rs200447839 | 21689115 | R,D | 0.8701 | 0.7188 | -0.029 | 0.063 | 0.2172 | 0.6412 |
| CDKAL1 | rs12524788  | 21690518 | T,G | 0.8725 | 0.7375 | -0.029 | 0.062 | 0.2165 | 0.6417 |
| CDKAL1 | rs1321253   | 21689813 | T,A | 0.8723 | 0.7273 | -0.029 | 0.063 | 0.2153 | 0.6426 |
| CDKAL1 | rs73392011  | 21569756 | C,T | 0.9671 | 0.445  | -0.064 | 0.138 | 0.215  | 0.6429 |
| CDKAL1 | rs141765572 | 21679089 | G,T | 0.9877 | 0.5484 | -0.109 | 0.234 | 0.2147 | 0.6431 |
| CDKAL1 | rs4712624   | 21693152 | A,G | 0.843  | 0.7383 | -0.027 | 0.058 | 0.2146 | 0.6432 |
| CDKAL1 | rs79753782  | 21594201 | C,A | 0.9506 | 0.6778 | 0.047  | 0.102 | 0.2144 | 0.6433 |
| CDKAL1 | rs77992585  | 21687331 | G,A | 0.8724 | 0.6862 | -0.03  | 0.065 | 0.2136 | 0.644  |
| CDKAL1 | rs114266456 | 21633347 | G,A | 0.9661 | 0.7099 | 0.056  | 0.121 | 0.2125 | 0.6448 |
| CDKAL1 | rs4712632   | 21732137 | G,A | 0.4138 | 0.9644 | 0.016  | 0.036 | 0.2069 | 0.6492 |
| CDKAL1 | rs76401928  | 21586715 | G,A | 0.9419 | 0.6097 | 0.043  | 0.094 | 0.2067 | 0.6494 |
| CDKAL1 | rs16885189  | 21729682 | G,A | 0.8667 | 0.9973 | -0.024 | 0.052 | 0.2064 | 0.6496 |
| CDKAL1 | rs111404042 | 21565201 | G,A | 0.9548 | 0.5207 | -0.053 | 0.117 | 0.2063 | 0.6497 |
| CDKAL1 | rs71657670  | 21613526 | R,D | 0.9864 | 0.77   | -0.088 | 0.193 | 0.2055 | 0.6503 |
| CDKAL1 | rs116300465 | 21738509 | T,G | 0.8638 | 0.9326 | -0.025 | 0.054 | 0.2055 | 0.6504 |
| CDKAL1 | rs113455272 | 21616778 | T,C | 0.9824 | 0.9392 | 0.066  | 0.147 | 0.2044 | 0.6512 |
| CDKAL1 | rs4710981   | 21732702 | G,C | 0.4166 | 0.9635 | 0.016  | 0.036 | 0.2015 | 0.6535 |
| CDKAL1 | rs78378200  | 21647275 | T,C | 0.985  | 0.7319 | 0.08   | 0.179 | 0.2012 | 0.6538 |
| CDKAL1 | rs111503674 | 21585461 | T,C | 0.941  | 0.5927 | 0.042  | 0.095 | 0.2004 | 0.6544 |
| CDKAL1 | rs4712631   | 21710896 | C,T | 0.586  | 0.9993 | -0.016 | 0.036 | 0.1979 | 0.6565 |
| CDKAL1 | rs78584681  | 21743570 | R,D | 0.7497 | 0.6177 | 0.023  | 0.051 | 0.1967 | 0.6574 |
| CDKAL1 | rs78529444  | 21722481 | A,G | 0.9876 | 0.8222 | -0.08  | 0.18  | 0.1962 | 0.6578 |
| CDKAL1 | rs111479343 | 21561070 | G,T | 0.9092 | 0.4694 | 0.035  | 0.08  | 0.1954 | 0.6584 |
| CDKAL1 | rs139581361 | 21722128 | G,A | 0.9879 | 0.8119 | 0.081  | 0.184 | 0.1949 | 0.6589 |
| CDKAL1 | rs113932195 | 21562740 | T,C | 0.9088 | 0.469  | 0.035  | 0.08  | 0.1938 | 0.6598 |
| CDKAL1 | rs7772258   | 21686985 | T,C | 0.8466 | 0.7118 | -0.026 | 0.06  | 0.19   | 0.6629 |
| CDKAL1 | rs79883278  | 21720741 | C,T | 0.9819 | 0.8353 | 0.056  | 0.128 | 0.19   | 0.6629 |
| CDKAL1 | rs115731554 | 21723090 | C,T | 0.9877 | 0.8291 | -0.078 | 0.18  | 0.1858 | 0.6664 |
| CDKAL1 | rs13362741  | 21700158 | A,C | 0.6707 | 0.8039 | 0.019  | 0.044 | 0.1803 | 0.6712 |
| CDKAL1 | rs7761575   | 21701475 | C,T | 0.672  | 0.8148 | 0.018  | 0.043 | 0.1783 | 0.6728 |
| CDKAL1 | rs7761844   | 21701456 | G,A | 0.6722 | 0.8149 | 0.018  | 0.043 | 0.1782 | 0.6729 |
| CDKAL1 | rs79521243  | 21581049 | T,C | 0.9405 | 0.5684 | 0.04   | 0.096 | 0.1769 | 0.674  |
| CDKAL1 | rs141898580 | 21709985 | C,T | 0.9816 | 0.8379 | 0.054  | 0.128 | 0.1767 | 0.6742 |
| CDKAL1 | rs112153247 | 21701183 | C,T | 0.6716 | 0.8121 | 0.018  | 0.043 | 0.1746 | 0.6761 |
| CDKAL1 | rs59730691  | 21701056 | C,T | 0.6717 | 0.8117 | 0.018  | 0.043 | 0.1744 | 0.6762 |
| CDKAL1 | rs62406887  | 21701319 | C,T | 0.6717 | 0.8135 | 0.018  | 0.043 | 0.1729 | 0.6776 |
| CDKAL1 | rs7762010   | 21701594 | G,A | 0.6719 | 0.8177 | 0.018  | 0.043 | 0.1697 | 0.6804 |

|        |             |          |     |        |        |        |       |        |        |
|--------|-------------|----------|-----|--------|--------|--------|-------|--------|--------|
| CDKAL1 | rs111357910 | 21723888 | A,G | 0.988  | 0.8511 | -0.074 | 0.18  | 0.169  | 0.681  |
| CDKAL1 | rs7761595   | 21701550 | A,G | 0.6721 | 0.8165 | 0.018  | 0.043 | 0.1688 | 0.6812 |
| CDKAL1 | rs73376030  | 21700390 | T,G | 0.6688 | 0.8019 | 0.018  | 0.044 | 0.1658 | 0.6839 |
| CDKAL1 | rs78345714  | 21734098 | T,C | 0.9849 | 0.6839 | -0.062 | 0.153 | 0.1642 | 0.6854 |
| CDKAL1 | rs561618338 | 21639342 | R,I | 0.9855 | 0.4795 | -0.087 | 0.216 | 0.162  | 0.6873 |
| CDKAL1 | rs58572340  | 21555505 | T,A | 0.8729 | 0.5846 | -0.025 | 0.062 | 0.1614 | 0.6879 |
| CDKAL1 | rs4712627   | 21701892 | C,T | 0.6719 | 0.828  | 0.017  | 0.043 | 0.161  | 0.6882 |
| CDKAL1 | rs36024930  | 21605537 | R,D | 0.7795 | 0.8154 | 0.019  | 0.048 | 0.1599 | 0.6893 |
| CDKAL1 | rs4712629   | 21702103 | A,G | 0.6716 | 0.83   | 0.017  | 0.043 | 0.1579 | 0.6911 |
| CDKAL1 | rs7754999   | 21705723 | C,T | 0.6691 | 0.8543 | 0.017  | 0.042 | 0.1569 | 0.692  |
| CDKAL1 | rs4712630   | 21702161 | T,C | 0.6716 | 0.8305 | 0.017  | 0.043 | 0.1568 | 0.6921 |
| CDKAL1 | rs114613272 | 21721382 | C,T | 0.984  | 0.8169 | 0.061  | 0.155 | 0.1569 | 0.6921 |
| CDKAL1 | rs149555362 | 21726144 | T,C | 0.9879 | 0.8456 | -0.071 | 0.18  | 0.1563 | 0.6925 |
| CDKAL1 | rs62403969  | 21702409 | A,C | 0.6716 | 0.8327 | 0.017  | 0.043 | 0.1559 | 0.6929 |
| CDKAL1 | rs12664833  | 21614978 | T,G | 0.8033 | 0.9552 | 0.018  | 0.047 | 0.1554 | 0.6934 |
| CDKAL1 | rs77155105  | 21682861 | C,G | 0.9671 | 0.7117 | -0.051 | 0.129 | 0.1534 | 0.6953 |
| CDKAL1 | rs115900264 | 21738499 | A,G | 0.8705 | 0.965  | -0.021 | 0.054 | 0.1511 | 0.6975 |
| CDKAL1 | rs11751574  | 21702901 | G,A | 0.6716 | 0.8382 | 0.017  | 0.043 | 0.1508 | 0.6978 |
| CDKAL1 | rs16885175  | 21726770 | A,G | 0.8585 | 0.8892 | -0.021 | 0.054 | 0.1489 | 0.6996 |
| CDKAL1 | rs57442902  | 21704602 | C,T | 0.6719 | 0.8494 | 0.016  | 0.042 | 0.1488 | 0.6997 |
| CDKAL1 | rs6927945   | 21703341 | T,C | 0.672  | 0.841  | 0.016  | 0.043 | 0.1478 | 0.7007 |
| CDKAL1 | rs9466156   | 21711491 | C,T | 0.5874 | 0.9998 | -0.014 | 0.036 | 0.1473 | 0.7011 |
| CDKAL1 | rs2328624   | 21703736 | G,C | 0.672  | 0.8448 | 0.016  | 0.043 | 0.1466 | 0.7018 |
| CDKAL1 | rs6933751   | 21704108 | T,C | 0.672  | 0.8471 | 0.016  | 0.042 | 0.1458 | 0.7026 |
| CDKAL1 | rs2328626   | 21703885 | C,T | 0.6717 | 0.8448 | 0.016  | 0.043 | 0.1455 | 0.7029 |
| CDKAL1 | rs2328625   | 21703880 | T,C | 0.6717 | 0.8446 | 0.016  | 0.043 | 0.1453 | 0.703  |
| CDKAL1 | rs9466155   | 21707222 | G,A | 0.6726 | 0.8766 | 0.016  | 0.042 | 0.1438 | 0.7045 |
| CDKAL1 | rs150766348 | 21706424 | R,D | 0.6681 | 0.8073 | 0.016  | 0.043 | 0.1425 | 0.7058 |
| CDKAL1 | rs116016141 | 21687920 | C,T | 0.988  | 0.5009 | -0.086 | 0.23  | 0.1401 | 0.7081 |
| CDKAL1 | rs10636012  | 21727515 | I,R | 0.4062 | 0.9929 | 0.014  | 0.036 | 0.1401 | 0.7082 |
| CDKAL1 | rs116239840 | 21722970 | A,C | 0.8218 | 0.9134 | 0.019  | 0.051 | 0.1401 | 0.7082 |
| CDKAL1 | rs11380611  | 21703686 | R,I | 0.6704 | 0.84   | 0.016  | 0.043 | 0.1384 | 0.7099 |
| CDKAL1 | rs141007801 | 21722788 | R,I | 0.8394 | 0.8482 | 0.021  | 0.056 | 0.1375 | 0.7108 |
| CDKAL1 | rs2180419   | 21728317 | A,G | 0.4028 | 0.9843 | 0.013  | 0.036 | 0.1359 | 0.7124 |
| CDKAL1 | rs112653724 | 21576915 | G,A | 0.9388 | 0.5234 | 0.036  | 0.098 | 0.1358 | 0.7125 |
| CDKAL1 | rs1830667   | 21728089 | G,T | 0.4027 | 0.9868 | 0.013  | 0.036 | 0.1356 | 0.7127 |
| CDKAL1 | rs1407655   | 21727902 | G,A | 0.4028 | 0.9882 | 0.013  | 0.036 | 0.1352 | 0.7131 |
| CDKAL1 | rs11284636  | 21591706 | R,D | 0.9858 | 0.4225 | 0.078  | 0.218 | 0.1292 | 0.7193 |
| CDKAL1 | rs9348483   | 21687390 | G,T | 0.7953 | 0.87   | 0.017  | 0.048 | 0.127  | 0.7216 |
| CDKAL1 | rs35578300  | 21741886 | R,D | 0.7077 | 0.8309 | -0.015 | 0.042 | 0.1267 | 0.7219 |
| CDKAL1 | rs4712628   | 21702070 | C,G | 0.6704 | 0.828  | 0.015  | 0.043 | 0.1253 | 0.7234 |
| CDKAL1 | rs73737568  | 21667546 | A,G | 0.9719 | 0.8789 | 0.039  | 0.109 | 0.1248 | 0.7239 |
| CDKAL1 | rs62403971  | 21702621 | T,C | 0.6704 | 0.8339 | 0.015  | 0.043 | 0.1221 | 0.7268 |
| CDKAL1 | rs112617138 | 21576898 | A,G | 0.938  | 0.5193 | 0.034  | 0.098 | 0.1201 | 0.7289 |
| CDKAL1 | rs145907846 | 21729085 | G,A | 0.9868 | 0.8724 | 0.056  | 0.165 | 0.1171 | 0.7322 |

|        |             |          |     |        |        |        |       |        |        |
|--------|-------------|----------|-----|--------|--------|--------|-------|--------|--------|
| CDKAL1 | rs9460660   | 21709294 | T,C | 0.616  | 0.9365 | -0.013 | 0.038 | 0.1166 | 0.7327 |
| CDKAL1 | rs75062640  | 21722533 | A,G | 0.9823 | 0.8162 | -0.05  | 0.147 | 0.1161 | 0.7333 |
| CDKAL1 | rs111887738 | 21616944 | T,C | 0.9828 | 0.9369 | 0.051  | 0.149 | 0.1159 | 0.7335 |
| CDKAL1 | rs56050802  | 21555539 | C,T | 0.8664 | 0.6128 | -0.02  | 0.059 | 0.1156 | 0.7339 |
| CDKAL1 | rs144306476 | 21721932 | T,G | 0.989  | 0.6617 | -0.068 | 0.202 | 0.1145 | 0.735  |
| CDKAL1 | rs55686449  | 21702505 | T,C | 0.6687 | 0.8289 | 0.014  | 0.043 | 0.1121 | 0.7378 |
| CDKAL1 | rs76934110  | 21669629 | G,A | 0.9626 | 0.7982 | -0.038 | 0.114 | 0.1103 | 0.7398 |
| CDKAL1 | rs75157802  | 21678178 | A,G | 0.9675 | 0.834  | -0.038 | 0.118 | 0.1039 | 0.7473 |
| CDKAL1 | rs75509154  | 21670162 | A,G | 0.9656 | 0.8408 | -0.037 | 0.115 | 0.1034 | 0.7478 |
| CDKAL1 | rs147488932 | 21672276 | G,A | 0.9657 | 0.8442 | -0.037 | 0.115 | 0.1028 | 0.7485 |
| CDKAL1 | rs78971333  | 21679601 | C,T | 0.9678 | 0.8229 | -0.038 | 0.121 | 0.1006 | 0.7511 |
| CDKAL1 | rs74492370  | 21679606 | G,A | 0.9678 | 0.8228 | -0.038 | 0.121 | 0.1004 | 0.7514 |
| CDKAL1 | rs116697959 | 21668594 | A,T | 0.9652 | 0.8312 | -0.036 | 0.115 | 0.0994 | 0.7526 |
| CDKAL1 | rs57792403  | 21738640 | R,D | 0.4364 | 0.9838 | 0.011  | 0.036 | 0.0978 | 0.7545 |
| CDKAL1 | rs9466161   | 21722916 | T,C | 0.7866 | 0.8907 | 0.014  | 0.045 | 0.0964 | 0.7561 |
| CDKAL1 | rs7772583   | 21726279 | G,A | 0.6306 | 0.9061 | 0.012  | 0.039 | 0.0913 | 0.7625 |
| CDKAL1 | rs6925407   | 21724100 | G,C | 0.9884 | 0.9399 | 0.052  | 0.173 | 0.0886 | 0.7659 |
| CDKAL1 | rs116300170 | 21663541 | G,A | 0.9641 | 0.8099 | -0.033 | 0.115 | 0.0849 | 0.7708 |
| CDKAL1 | rs61661762  | 21588463 | A,G | 0.9883 | 0.3149 | 0.084  | 0.292 | 0.0826 | 0.7738 |
| CDKAL1 | rs546083928 | 21596246 | R,I | 0.9877 | 0.6818 | -0.063 | 0.223 | 0.0798 | 0.7776 |
| CDKAL1 | rs840982    | 21740321 | T,C | 0.4378 | 0.9967 | 0.01   | 0.036 | 0.0778 | 0.7803 |
| CDKAL1 | rs112102336 | 21677692 | G,T | 0.9639 | 0.7866 | -0.032 | 0.115 | 0.0776 | 0.7805 |
| CDKAL1 | rs138387168 | 21716280 | C,T | 0.9765 | 0.7359 | -0.038 | 0.136 | 0.0763 | 0.7824 |
| CDKAL1 | rs9460657   | 21660051 | C,T | 0.8938 | 0.8161 | -0.016 | 0.06  | 0.0759 | 0.7829 |
| CDKAL1 | rs840981    | 21740238 | G,A | 0.4381 | 1      | 0.01   | 0.036 | 0.0752 | 0.7839 |
| CDKAL1 | rs12374633  | 21654974 | G,A | 0.9698 | 0.9337 | 0.028  | 0.102 | 0.0739 | 0.7857 |
| CDKAL1 | rs7759495   | 21706044 | G,A | 0.6142 | 0.9046 | -0.01  | 0.039 | 0.0733 | 0.7866 |
| CDKAL1 | rs80349490  | 21615188 | T,C | 0.9491 | 0.4807 | -0.035 | 0.129 | 0.0732 | 0.7867 |
| CDKAL1 | rs141900910 | 21647244 | C,T | 0.9864 | 0.543  | -0.057 | 0.212 | 0.0725 | 0.7877 |
| CDKAL1 | rs146017644 | 21640727 | C,T | 0.9833 | 0.5529 | -0.051 | 0.189 | 0.0719 | 0.7886 |
| CDKAL1 | rs1989470   | 21715067 | T,A | 0.5732 | 0.9562 | -0.01  | 0.036 | 0.0704 | 0.7907 |
| CDKAL1 | rs73737565  | 21664442 | T,G | 0.9768 | 0.5564 | -0.04  | 0.152 | 0.07   | 0.7913 |
| CDKAL1 | rs6941897   | 21671979 | C,A | 0.9897 | 0.6097 | 0.055  | 0.209 | 0.0698 | 0.7917 |
| CDKAL1 | rs117538721 | 21647180 | T,C | 0.986  | 0.5245 | -0.056 | 0.212 | 0.0689 | 0.7929 |
| CDKAL1 | rs148261621 | 21712086 | R,I | 0.7162 | 0.7178 | 0.013  | 0.048 | 0.0673 | 0.7953 |
| CDKAL1 | rs7746424   | 21685920 | C,T | 0.9762 | 0.4981 | -0.043 | 0.166 | 0.0669 | 0.7959 |
| CDKAL1 | rs116187696 | 21639646 | G,A | 0.9868 | 0.5351 | -0.055 | 0.213 | 0.0658 | 0.7976 |
| CDKAL1 | rs6934807   | 21653677 | A,G | 0.9709 | 0.9814 | 0.026  | 0.102 | 0.0648 | 0.799  |
| CDKAL1 | rs9460669   | 21729251 | A,G | 0.4053 | 0.9459 | 0.009  | 0.037 | 0.0619 | 0.8035 |
| CDKAL1 | rs1853345   | 21742346 | T,C | 0.73   | 0.9808 | -0.01  | 0.038 | 0.0611 | 0.8047 |
| CDKAL1 | rs76944255  | 21582643 | G,A | 0.981  | 0.4687 | 0.045  | 0.186 | 0.0594 | 0.8074 |
| CDKAL1 | rs62406886  | 21701119 | T,C | 0.6631 | 0.8167 | 0.011  | 0.043 | 0.0593 | 0.8075 |
| CDKAL1 | rs4712626   | 21701841 | G,A | 0.6545 | 0.8328 | 0.01   | 0.042 | 0.0581 | 0.8095 |
| CDKAL1 | rs57690989  | 21652353 | T,G | 0.9629 | 0.903  | -0.022 | 0.091 | 0.0578 | 0.8101 |
| CDKAL1 | rs9466136   | 21653258 | C,T | 0.905  | 0.8569 | 0.014  | 0.061 | 0.057  | 0.8113 |

|        |             |          |     |        |        |        |       |        |        |
|--------|-------------|----------|-----|--------|--------|--------|-------|--------|--------|
| CDKAL1 | rs72175369  | 21738076 | R,D | 0.9214 | 0.781  | -0.018 | 0.076 | 0.0561 | 0.8128 |
| CDKAL1 | rs6904795   | 21703099 | A,G | 0.6649 | 0.8486 | 0.01   | 0.042 | 0.0534 | 0.8173 |
| CDKAL1 | rs73374488  | 21666188 | G,A | 0.9707 | 0.8902 | 0.024  | 0.107 | 0.0517 | 0.8201 |
| CDKAL1 | rs12183824  | 21726382 | G,A | 0.8184 | 0.3562 | -0.018 | 0.077 | 0.0516 | 0.8203 |
| CDKAL1 | rs145960980 | 21729330 | D,R | 0.4093 | 0.9758 | 0.008  | 0.036 | 0.0505 | 0.8221 |
| CDKAL1 | rs148775927 | 21677832 | C,G | 0.9884 | 0.5129 | -0.059 | 0.262 | 0.0505 | 0.8222 |
| CDKAL1 | rs6456442   | 21698279 | T,C | 0.5821 | 0.821  | -0.009 | 0.039 | 0.0504 | 0.8224 |
| CDKAL1 | rs80061387  | 21579793 | T,C | 0.9808 | 0.4585 | 0.041  | 0.187 | 0.0494 | 0.8241 |
| CDKAL1 | rs143796183 | 21587351 | G,A | 0.9851 | 0.3168 | -0.069 | 0.312 | 0.0493 | 0.8242 |
| CDKAL1 | rs7746292   | 21685907 | A,G | 0.9762 | 0.4817 | -0.037 | 0.168 | 0.048  | 0.8266 |
| CDKAL1 | rs116104882 | 21654116 | G,C | 0.9607 | 0.7845 | -0.023 | 0.112 | 0.0434 | 0.835  |
| CDKAL1 | rs9466154   | 21706155 | G,T | 0.6423 | 0.8816 | -0.008 | 0.04  | 0.0413 | 0.839  |
| CDKAL1 | rs111482236 | 21588455 | T,C | 0.9537 | 0.6111 | 0.023  | 0.111 | 0.0411 | 0.8394 |
| CDKAL1 | rs144222210 | 21726206 | C,T | 0.987  | 0.7975 | -0.036 | 0.178 | 0.0402 | 0.8411 |
| CDKAL1 | rs9350367   | 21555608 | C,T | 0.6563 | 0.3839 | 0.012  | 0.058 | 0.0399 | 0.8416 |
| CDKAL1 | rs375807437 | 21686609 | R,D | 0.5634 | 0.7421 | -0.008 | 0.041 | 0.0393 | 0.8429 |
| CDKAL1 | rs59759742  | 21707319 | T,G | 0.6009 | 0.9285 | -0.007 | 0.037 | 0.0376 | 0.8463 |
| CDKAL1 | rs200822534 | 21701029 | R,D | 0.6386 | 0.6957 | 0.009  | 0.046 | 0.0373 | 0.8468 |
| CDKAL1 | rs369470901 | 21707320 | R,I | 0.6014 | 0.9269 | -0.007 | 0.037 | 0.0373 | 0.8469 |
| CDKAL1 | rs9366408   | 21742607 | G,A | 0.9822 | 0.9856 | 0.022  | 0.113 | 0.0368 | 0.8479 |
| CDKAL1 | rs1555287   | 21686091 | G,A | 0.5629 | 0.8575 | -0.007 | 0.039 | 0.0367 | 0.8481 |
| CDKAL1 | rs73392015  | 21591766 | C,T | 0.9671 | 0.4088 | -0.031 | 0.163 | 0.0366 | 0.8483 |
| CDKAL1 | rs7738599   | 21631790 | A,G | 0.9365 | 0.4203 | 0.022  | 0.12  | 0.0344 | 0.8529 |
| CDKAL1 | rs140423760 | 21646093 | C,A | 0.9884 | 0.552  | -0.041 | 0.222 | 0.0342 | 0.8532 |
| CDKAL1 | rs6925119   | 21701083 | G,A | 0.6412 | 0.822  | -0.008 | 0.042 | 0.0341 | 0.8535 |
| CDKAL1 | rs62403974  | 21713978 | T,C | 0.7736 | 0.9053 | -0.008 | 0.044 | 0.0337 | 0.8543 |
| CDKAL1 | rs9295516   | 21673560 | C,T | 0.9483 | 0.8605 | 0.014  | 0.079 | 0.0303 | 0.8619 |
| CDKAL1 | rs7773111   | 21696531 | G,A | 0.6146 | 0.751  | -0.007 | 0.043 | 0.0296 | 0.8633 |
| CDKAL1 | rs183503583 | 21638847 | G,A | 0.9885 | 0.5492 | -0.038 | 0.223 | 0.0296 | 0.8635 |
| CDKAL1 | rs76857610  | 21685543 | G,T | 0.9888 | 0.4734 | -0.041 | 0.241 | 0.0284 | 0.8661 |
| CDKAL1 | rs840985    | 21744508 | G,A | 0.5605 | 0.3093 | -0.01  | 0.063 | 0.0264 | 0.8709 |
| CDKAL1 | rs16885170  | 21716554 | G,A | 0.8229 | 0.9708 | -0.007 | 0.046 | 0.026  | 0.8718 |
| CDKAL1 | rs1973986   | 21687571 | A,T | 0.5557 | 0.8895 | -0.006 | 0.038 | 0.0254 | 0.8734 |
| CDKAL1 | rs2181318   | 21691468 | T,C | 0.549  | 0.9168 | -0.006 | 0.037 | 0.0251 | 0.8741 |
| CDKAL1 | rs79847215  | 21560355 | C,A | 0.9848 | 0.3334 | 0.036  | 0.231 | 0.0246 | 0.8753 |
| CDKAL1 | rs9368333   | 21743631 | A,C | 0.9748 | 0.5254 | 0.02   | 0.131 | 0.0233 | 0.8787 |
| CDKAL1 | rs114750919 | 21725361 | C,G | 0.9867 | 0.8444 | 0.022  | 0.16  | 0.0197 | 0.8884 |
| CDKAL1 | rs1475149   | 21688142 | G,A | 0.5662 | 0.9247 | -0.005 | 0.037 | 0.0176 | 0.8944 |
| CDKAL1 | rs4712620   | 21554898 | A,C | 0.6509 | 0.3847 | 0.008  | 0.057 | 0.0174 | 0.8949 |
| CDKAL1 | rs80230506  | 21655914 | C,A | 0.9607 | 0.7829 | -0.015 | 0.111 | 0.0172 | 0.8956 |
| CDKAL1 | rs145545902 | 21735584 | D,R | 0.6454 | 0.9341 | -0.005 | 0.039 | 0.0158 | 0.8999 |
| CDKAL1 | rs7775506   | 21729962 | C,T | 0.4216 | 0.9976 | 0.004  | 0.035 | 0.0154 | 0.9014 |
| CDKAL1 | rs7771671   | 21662524 | T,G | 0.9284 | 0.8382 | 0.008  | 0.073 | 0.0131 | 0.9089 |
| CDKAL1 | rs7751397   | 21662535 | C,T | 0.9285 | 0.8402 | 0.008  | 0.073 | 0.0128 | 0.9099 |
| CDKAL1 | rs78712702  | 21700242 | T,A | 0.9843 | 0.4664 | 0.025  | 0.225 | 0.012  | 0.9127 |

|        |             |          |     |        |        |        |       |        |        |
|--------|-------------|----------|-----|--------|--------|--------|-------|--------|--------|
| CDKAL1 | rs7739186   | 21657833 | T,C | 0.9158 | 0.8085 | 0.007  | 0.068 | 0.01   | 0.9204 |
| CDKAL1 | rs9466141   | 21673993 | C,T | 0.9236 | 0.9976 | 0.006  | 0.063 | 0.0099 | 0.9208 |
| CDKAL1 | rs147795739 | 21606396 | C,G | 0.9894 | 0.6082 | 0.02   | 0.215 | 0.009  | 0.9245 |
| CDKAL1 | rs7753451   | 21607833 | T,C | 0.9894 | 0.606  | 0.02   | 0.216 | 0.0083 | 0.9276 |
| CDKAL1 | rs138585583 | 21678890 | R,D | 0.8749 | 0.9014 | 0.004  | 0.051 | 0.0076 | 0.9304 |
| CDKAL1 | rs9466143   | 21676688 | A,T | 0.943  | 0.8542 | 0.006  | 0.077 | 0.0055 | 0.941  |
| CDKAL1 | rs115252874 | 21601345 | A,C | 0.9891 | 0.6163 | 0.015  | 0.211 | 0.0052 | 0.9424 |
| CDKAL1 | rs118074543 | 21601297 | C,G | 0.9891 | 0.6166 | 0.015  | 0.211 | 0.0052 | 0.9427 |
| CDKAL1 | rs6918842   | 21691009 | C,T | 0.5679 | 0.9924 | -0.002 | 0.036 | 0.0048 | 0.9448 |
| CDKAL1 | rs116443937 | 21600982 | A,T | 0.9889 | 0.6106 | 0.014  | 0.21  | 0.0046 | 0.946  |
| CDKAL1 | rs7739131   | 21727148 | C,T | 0.7149 | 0.9794 | -0.002 | 0.039 | 0.0038 | 0.9507 |
| CDKAL1 | rs112650104 | 21611568 | C,G | 0.9871 | 0.889  | 0.011  | 0.181 | 0.0037 | 0.9512 |
| CDKAL1 | rs111228858 | 21612309 | G,A | 0.9872 | 0.8945 | 0.011  | 0.181 | 0.0037 | 0.9513 |
| CDKAL1 | rs78923341  | 21612472 | A,C | 0.9872 | 0.895  | 0.011  | 0.181 | 0.0037 | 0.9514 |
| CDKAL1 | rs561391795 | 21725044 | R,D | 0.9346 | 0.4431 | 0.006  | 0.1   | 0.0031 | 0.9558 |
| CDKAL1 | rs9466140   | 21673293 | A,G | 0.9286 | 0.9271 | 0.004  | 0.068 | 0.0028 | 0.9579 |
| CDKAL1 | rs185847252 | 21676018 | G,A | 0.9496 | 0.8487 | 0.004  | 0.08  | 0.0027 | 0.9589 |
| CDKAL1 | rs75159243  | 21656071 | A,T | 0.9838 | 0.4842 | 0.01   | 0.202 | 0.0026 | 0.9592 |
| CDKAL1 | rs66735249  | 21686666 | D,R | 0.551  | 0.8357 | -0.002 | 0.039 | 0.0025 | 0.96   |
| CDKAL1 | rs117396734 | 21615374 | A,T | 0.9894 | 0.5869 | 0.011  | 0.22  | 0.0024 | 0.961  |
| CDKAL1 | rs9466144   | 21676886 | G,T | 0.943  | 0.852  | 0.004  | 0.077 | 0.0023 | 0.9614 |
| CDKAL1 | rs9466160   | 21722771 | A,G | 0.9736 | 0.8106 | -0.005 | 0.117 | 0.0021 | 0.9638 |
| CDKAL1 | rs6935968   | 21613156 | G,A | 0.9849 | 0.9776 | -0.007 | 0.158 | 0.0019 | 0.965  |
| CDKAL1 | rs113842280 | 21611571 | T,G | 0.9848 | 0.967  | -0.007 | 0.159 | 0.0019 | 0.9652 |
| CDKAL1 | rs79684204  | 21687368 | A,C | 0.9748 | 0.5098 | -0.007 | 0.159 | 0.0019 | 0.9655 |
| CDKAL1 | rs112538002 | 21611751 | T,C | 0.9848 | 0.97   | -0.007 | 0.159 | 0.0018 | 0.9661 |
| CDKAL1 | rs75127321  | 21613946 | G,A | 0.9849 | 0.9767 | -0.007 | 0.158 | 0.0017 | 0.9672 |
| CDKAL1 | rs6456440   | 21658236 | C,A | 0.9344 | 0.7776 | 0.003  | 0.073 | 0.0016 | 0.968  |
| CDKAL1 | rs77222012  | 21614945 | G,A | 0.9849 | 0.9755 | -0.006 | 0.159 | 0.0015 | 0.9689 |
| CDKAL1 | rs150071402 | 21610552 | G,A | 0.9896 | 0.5952 | 0.008  | 0.22  | 0.0015 | 0.9696 |
| CDKAL1 | rs10557323  | 21615430 | R,D | 0.9849 | 0.974  | -0.006 | 0.159 | 0.0014 | 0.9704 |
| CDKAL1 | rs78278852  | 21688571 | G,A | 0.9753 | 0.5113 | -0.005 | 0.161 | 0.0008 | 0.9772 |
| CDKAL1 | rs35487983  | 21739331 | R,D | 0.6885 | 0.8315 | -0.001 | 0.042 | 0.0008 | 0.9774 |
| CDKAL1 | rs148767257 | 21687606 | C,T | 0.9752 | 0.5064 | -0.004 | 0.161 | 0.0007 | 0.9785 |
| CDKAL1 | rs912025    | 21716058 | C,G | 0.8371 | 0.9358 | 0.001  | 0.049 | 0.0007 | 0.9792 |
| CDKAL1 | rs142460847 | 21687632 | A,G | 0.9751 | 0.5044 | -0.004 | 0.161 | 0.0007 | 0.9793 |
| CDKAL1 | rs112553613 | 21616239 | A,G | 0.9848 | 0.9676 | -0.004 | 0.159 | 0.0006 | 0.9809 |
| CDKAL1 | rs116342166 | 21630548 | T,C | 0.9891 | 0.5558 | -0.005 | 0.224 | 0.0005 | 0.9824 |
| CDKAL1 | rs7747757   | 21686714 | C,T | 0.9752 | 0.5035 | -0.003 | 0.161 | 0.0005 | 0.9829 |
| CDKAL1 | rs115180462 | 21686653 | G,C | 0.9752 | 0.5032 | -0.003 | 0.161 | 0.0004 | 0.9832 |
| CDKAL1 | rs7746895   | 21686168 | C,A | 0.9752 | 0.5028 | -0.003 | 0.162 | 0.0003 | 0.986  |
| CDKAL1 | rs571788443 | 21558875 | R,D | 0.8581 | 0.3304 | -0.001 | 0.076 | 0.0002 | 0.9878 |
| CDKAL1 | rs7746432   | 21685933 | C,T | 0.9755 | 0.5041 | -0.002 | 0.162 | 0.0001 | 0.991  |
| CDKAL1 | rs115061151 | 21659040 | A,C | 0.9843 | 0.4916 | -0.002 | 0.203 | 0.0001 | 0.9925 |
| CDKAL1 | rs116258702 | 21618081 | C,T | 0.9891 | 0.5647 | 0.002  | 0.221 | 0.0001 | 0.993  |

|        |             |          |     |        |        |        |       |   |        |
|--------|-------------|----------|-----|--------|--------|--------|-------|---|--------|
| CDKAL1 | rs113534734 | 21596349 | R,D | 0.9404 | 0.7354 | 0      | 0.09  | 0 | 0.9966 |
| CDKAL1 | rs6456441   | 21658313 | A,T | 0.9842 | 0.4898 | -0.001 | 0.203 | 0 | 0.9966 |

SNP association with **SOX4** sorted by p-value

|      |             |          |     |        |        |        |       |        |          |
|------|-------------|----------|-----|--------|--------|--------|-------|--------|----------|
| SOX4 | rs72175369  | 21738076 | R,D | 0.9214 | 0.781  | 0.343  | 0.131 | 6.8263 | 0.008983 |
| SOX4 | rs7451817   | 21735497 | A,C | 0.9341 | 0.9124 | 0.337  | 0.133 | 6.4457 | 0.01112  |
| SOX4 | rs9358449   | 21732383 | G,A | 0.937  | 0.9915 | 0.311  | 0.129 | 5.8172 | 0.01587  |
| SOX4 | rs12206842  | 21734489 | A,T | 0.9372 | 1      | 0.31   | 0.129 | 5.7854 | 0.01616  |
| SOX4 | rs6941897   | 21671979 | C,A | 0.9897 | 0.6097 | -0.865 | 0.361 | 5.7599 | 0.0164   |
| SOX4 | rs9358448   | 21731736 | G,A | 0.9305 | 0.9625 | 0.296  | 0.126 | 5.5305 | 0.01869  |
| SOX4 | rs9348484   | 21731460 | C,G | 0.93   | 0.9619 | 0.295  | 0.126 | 5.5252 | 0.01874  |
| SOX4 | rs80177376  | 21744978 | C,T | 0.9048 | 0.3545 | 0.389  | 0.176 | 4.8931 | 0.02696  |
| SOX4 | rs112039884 | 21729100 | C,T | 0.9274 | 0.9676 | 0.263  | 0.124 | 4.5154 | 0.03359  |
| SOX4 | rs71657670  | 21613526 | R,D | 0.9864 | 0.77   | -0.705 | 0.334 | 4.4501 | 0.0349   |
| SOX4 | rs111442391 | 21730723 | C,T | 0.9726 | 0.3086 | 0.691  | 0.329 | 4.4135 | 0.03566  |
| SOX4 | rs75327712  | 21728829 | G,A | 0.9295 | 0.9778 | 0.257  | 0.125 | 4.2478 | 0.0393   |
| SOX4 | rs79949484  | 21728966 | G,A | 0.9319 | 0.8819 | 0.272  | 0.133 | 4.1475 | 0.0417   |
| SOX4 | rs10946466  | 21727456 | C,A | 0.9298 | 0.9928 | 0.248  | 0.124 | 3.9864 | 0.04587  |
| SOX4 | rs111412021 | 21606278 | T,C | 0.9882 | 0.8163 | -0.698 | 0.354 | 3.8896 | 0.04859  |
| SOX4 | rs12189901  | 21726940 | G,A | 0.9308 | 0.9638 | 0.248  | 0.127 | 3.8181 | 0.0507   |
| SOX4 | rs570404489 | 21689796 | R,D | 0.7798 | 0.3015 | -0.259 | 0.133 | 3.7747 | 0.05203  |
| SOX4 | rs79169915  | 21607457 | G,A | 0.9882 | 0.848  | -0.657 | 0.342 | 3.7008 | 0.05439  |
| SOX4 | rs145545902 | 21735584 | D,R | 0.6454 | 0.9341 | -0.127 | 0.068 | 3.5366 | 0.06003  |
| SOX4 | rs113455272 | 21616778 | T,C | 0.9824 | 0.9392 | -0.468 | 0.254 | 3.4099 | 0.06481  |
| SOX4 | rs78923341  | 21612472 | A,C | 0.9872 | 0.895  | -0.571 | 0.312 | 3.3522 | 0.06711  |
| SOX4 | rs111228858 | 21612309 | G,A | 0.9872 | 0.8945 | -0.571 | 0.312 | 3.3493 | 0.06723  |
| SOX4 | rs112650104 | 21611568 | C,G | 0.9871 | 0.889  | -0.568 | 0.312 | 3.3007 | 0.06925  |
| SOX4 | rs138380902 | 21731187 | R,D | 0.9079 | 0.9299 | 0.199  | 0.109 | 3.2972 | 0.0694   |
| SOX4 | rs6935968   | 21613156 | G,A | 0.9849 | 0.9776 | -0.49  | 0.273 | 3.2116 | 0.07312  |
| SOX4 | rs75127321  | 21613946 | G,A | 0.9849 | 0.9767 | -0.49  | 0.273 | 3.2063 | 0.07336  |
| SOX4 | rs111887738 | 21616944 | T,C | 0.9828 | 0.9369 | -0.461 | 0.258 | 3.199  | 0.07368  |
| SOX4 | rs77222012  | 21614945 | G,A | 0.9849 | 0.9755 | -0.489 | 0.274 | 3.1988 | 0.07369  |
| SOX4 | rs10557323  | 21615430 | R,D | 0.9849 | 0.974  | -0.489 | 0.274 | 3.1929 | 0.07396  |
| SOX4 | rs548873349 | 21736947 | R,I | 0.8405 | 0.7508 | -0.169 | 0.095 | 3.1795 | 0.07457  |
| SOX4 | rs112553613 | 21616239 | A,G | 0.9848 | 0.9676 | -0.486 | 0.274 | 3.1466 | 0.07608  |
| SOX4 | rs112538002 | 21611751 | T,C | 0.9848 | 0.97   | -0.486 | 0.274 | 3.1453 | 0.07614  |
| SOX4 | rs113842280 | 21611571 | T,G | 0.9848 | 0.967  | -0.485 | 0.274 | 3.13   | 0.07686  |
| SOX4 | rs16885189  | 21729682 | G,A | 0.8667 | 0.9973 | -0.158 | 0.09  | 3.0537 | 0.08055  |
| SOX4 | rs1555529   | 21691704 | A,G | 0.7822 | 0.9942 | 0.129  | 0.076 | 2.9001 | 0.08858  |
| SOX4 | rs546083928 | 21596246 | R,I | 0.9877 | 0.6818 | -0.65  | 0.385 | 2.8488 | 0.09144  |
| SOX4 | rs77394991  | 21735578 | C,T | 0.8447 | 0.9263 | -0.145 | 0.086 | 2.8396 | 0.09197  |
| SOX4 | rs7762989   | 21624153 | C,T | 0.9883 | 0.8214 | -0.577 | 0.349 | 2.7409 | 0.09781  |
| SOX4 | rs4710982   | 21733835 | G,C | 0.8653 | 0.9343 | -0.153 | 0.093 | 2.6884 | 0.1011   |
| SOX4 | rs543173991 | 21629474 | T,A | 0.9884 | 0.7664 | -0.569 | 0.355 | 2.5682 | 0.109    |
| SOX4 | rs12525631  | 21730840 | C,T | 0.8794 | 0.9968 | -0.152 | 0.095 | 2.5616 | 0.1095   |
| SOX4 | rs190176895 | 21629550 | C,A | 0.9877 | 0.7487 | -0.559 | 0.35  | 2.5494 | 0.1103   |



|      |             |          |     |        |        |        |       |        |        |
|------|-------------|----------|-----|--------|--------|--------|-------|--------|--------|
| SOX4 | rs111411936 | 21626246 | G,A | 0.9877 | 0.7672 | -0.553 | 0.348 | 2.5271 | 0.1119 |
| SOX4 | rs140066406 | 21728813 | R,I | 0.8701 | 0.9744 | -0.145 | 0.092 | 2.5009 | 0.1138 |
| SOX4 | rs6456437   | 21615443 | T,C | 0.7388 | 0.9506 | -0.113 | 0.072 | 2.4908 | 0.1145 |
| SOX4 | rs76501983  | 21631411 | G,A | 0.9854 | 0.8228 | -0.472 | 0.301 | 2.4604 | 0.1167 |
| SOX4 | rs9460670   | 21731138 | C,A | 0.877  | 0.9736 | -0.147 | 0.095 | 2.4341 | 0.1187 |
| SOX4 | rs6924745   | 21693837 | C,T | 0.8421 | 0.8514 | -0.146 | 0.094 | 2.4212 | 0.1197 |
| SOX4 | rs12528487  | 21735354 | A,G | 0.8629 | 0.9338 | -0.144 | 0.093 | 2.4175 | 0.12   |
| SOX4 | rs9348480   | 21617782 | G,A | 0.7922 | 0.9408 | -0.118 | 0.078 | 2.3152 | 0.1281 |
| SOX4 | rs75159243  | 21656071 | A,T | 0.9838 | 0.4842 | -0.528 | 0.348 | 2.2987 | 0.1295 |
| SOX4 | rs9460658   | 21684193 | C,T | 0.9792 | 0.347  | -0.571 | 0.377 | 2.2921 | 0.13   |
| SOX4 | rs9366406   | 21617668 | T,A | 0.7397 | 0.9296 | -0.109 | 0.072 | 2.2805 | 0.131  |
| SOX4 | rs112395953 | 21727909 | A,C | 0.885  | 0.9741 | -0.146 | 0.097 | 2.2782 | 0.1312 |
| SOX4 | rs4712633   | 21738249 | A,G | 0.8598 | 1      | -0.134 | 0.089 | 2.2616 | 0.1326 |
| SOX4 | rs7739775   | 21727465 | C,T | 0.87   | 0.9769 | -0.138 | 0.092 | 2.2581 | 0.1329 |
| SOX4 | rs189742413 | 21683505 | C,T | 0.984  | 0.4632 | -0.451 | 0.303 | 2.2225 | 0.136  |
| SOX4 | rs9466128   | 21606679 | G,T | 0.3766 | 0.995  | 0.089  | 0.063 | 1.9637 | 0.1611 |
| SOX4 | rs143636013 | 21649787 | G,C | 0.9413 | 0.7828 | -0.211 | 0.151 | 1.9461 | 0.163  |
| SOX4 | rs112117324 | 21606452 | C,T | 0.9756 | 0.8592 | -0.281 | 0.202 | 1.9362 | 0.1641 |
| SOX4 | rs115900264 | 21738499 | A,G | 0.8705 | 0.965  | -0.129 | 0.094 | 1.9118 | 0.1668 |
| SOX4 | rs113064891 | 21606092 | R,I | 0.9811 | 0.9369 | -0.316 | 0.231 | 1.8716 | 0.1713 |
| SOX4 | rs112892524 | 21608321 | C,T | 0.981  | 0.9464 | -0.313 | 0.229 | 1.8634 | 0.1722 |
| SOX4 | rs9358442   | 21573637 | G,A | 0.7034 | 0.4581 | -0.136 | 0.1   | 1.8614 | 0.1725 |
| SOX4 | rs111684701 | 21608562 | C,T | 0.9809 | 0.9509 | -0.313 | 0.229 | 1.8608 | 0.1725 |
| SOX4 | rs7740142   | 21609635 | G,A | 0.9809 | 0.955  | -0.311 | 0.228 | 1.8525 | 0.1735 |
| SOX4 | rs9348483   | 21687390 | G,T | 0.7953 | 0.87   | 0.111  | 0.082 | 1.8078 | 0.1788 |
| SOX4 | rs7772583   | 21726279 | G,A | 0.6306 | 0.9061 | -0.09  | 0.067 | 1.7898 | 0.181  |
| SOX4 | rs7739235   | 21609345 | A,T | 0.9799 | 0.962  | -0.296 | 0.222 | 1.7874 | 0.1812 |
| SOX4 | rs6456441   | 21658313 | A,T | 0.9842 | 0.4898 | -0.465 | 0.351 | 1.7633 | 0.1842 |
| SOX4 | rs12664833  | 21614978 | T,G | 0.8033 | 0.9552 | -0.107 | 0.08  | 1.7608 | 0.1845 |
| SOX4 | rs115061151 | 21659040 | A,C | 0.9843 | 0.4916 | -0.459 | 0.35  | 1.719  | 0.1898 |
| SOX4 | rs2144867   | 21689100 | C,T | 0.9874 | 0.3281 | 0.612  | 0.468 | 1.7151 | 0.1903 |
| SOX4 | rs9358441   | 21565339 | T,C | 0.7025 | 0.3571 | -0.141 | 0.108 | 1.7115 | 0.1908 |
| SOX4 | rs9295513   | 21599766 | G,A | 0.9746 | 0.8988 | -0.26  | 0.201 | 1.6777 | 0.1952 |
| SOX4 | rs34197291  | 21611277 | R,D | 0.7729 | 0.7368 | -0.113 | 0.089 | 1.6182 | 0.2033 |
| SOX4 | rs7739186   | 21657833 | T,C | 0.9158 | 0.8085 | -0.15  | 0.118 | 1.6147 | 0.2038 |
| SOX4 | rs7741780   | 21685460 | A,G | 0.8336 | 0.732  | -0.122 | 0.097 | 1.592  | 0.207  |
| SOX4 | rs1615194   | 21648442 | T,C | 0.7437 | 0.9296 | -0.097 | 0.077 | 1.5867 | 0.2078 |
| SOX4 | rs112102336 | 21677692 | G,T | 0.9639 | 0.7866 | -0.25  | 0.199 | 1.579  | 0.2089 |
| SOX4 | rs7756206   | 21635314 | T,G | 0.7423 | 0.8724 | -0.099 | 0.079 | 1.572  | 0.2099 |
| SOX4 | rs9350368   | 21562144 | A,G | 0.6823 | 0.3726 | -0.128 | 0.103 | 1.5612 | 0.2115 |
| SOX4 | rs78870816  | 21665363 | C,T | 0.9434 | 0.7804 | -0.188 | 0.151 | 1.5602 | 0.2116 |
| SOX4 | rs2180418   | 21690172 | A,G | 0.8397 | 0.9885 | -0.106 | 0.085 | 1.5535 | 0.2126 |
| SOX4 | rs80264536  | 21666345 | T,G | 0.9437 | 0.7836 | -0.187 | 0.151 | 1.5476 | 0.2135 |
| SOX4 | rs76062205  | 21666427 | C,T | 0.9438 | 0.7852 | -0.187 | 0.151 | 1.5459 | 0.2137 |
| SOX4 | rs36027263  | 21648358 | I,R | 0.7129 | 0.8819 | -0.095 | 0.077 | 1.5353 | 0.2153 |

|      |             |          |     |        |        |        |       |        |        |
|------|-------------|----------|-----|--------|--------|--------|-------|--------|--------|
| SOX4 | rs16885175  | 21726770 | A,G | 0.8585 | 0.8892 | -0.115 | 0.093 | 1.5224 | 0.2173 |
| SOX4 | rs150997476 | 21663402 | A,T | 0.9893 | 0.6383 | 0.506  | 0.41  | 1.5201 | 0.2176 |
| SOX4 | rs1744866   | 21631188 | C,T | 0.9885 | 0.3807 | 0.58   | 0.477 | 1.4758 | 0.2244 |
| SOX4 | rs113815998 | 21709365 | G,T | 0.9608 | 0.7324 | -0.208 | 0.172 | 1.4662 | 0.2259 |
| SOX4 | rs116300465 | 21738509 | T,G | 0.8638 | 0.9326 | -0.113 | 0.094 | 1.4603 | 0.2269 |
| SOX4 | rs78825652  | 21609539 | I,R | 0.6732 | 0.9671 | -0.078 | 0.065 | 1.4592 | 0.2271 |
| SOX4 | rs1740849   | 21619809 | G,A | 0.3637 | 0.9622 | 0.08   | 0.066 | 1.4562 | 0.2275 |
| SOX4 | rs114613272 | 21721382 | C,T | 0.984  | 0.8169 | -0.323 | 0.268 | 1.4565 | 0.2275 |
| SOX4 | rs1744895   | 21680899 | G,C | 0.4958 | 1      | 0.08   | 0.066 | 1.4446 | 0.2294 |
| SOX4 | rs1744893   | 21680746 | T,C | 0.5019 | 0.987  | 0.081  | 0.067 | 1.4443 | 0.2294 |
| SOX4 | rs1740855   | 21680782 | C,T | 0.5021 | 0.9879 | 0.081  | 0.067 | 1.4414 | 0.2299 |
| SOX4 | rs1744892   | 21680206 | A,G | 0.4953 | 0.9943 | 0.079  | 0.066 | 1.4113 | 0.2348 |
| SOX4 | rs1740856   | 21681223 | G,A | 0.5041 | 0.9379 | 0.082  | 0.069 | 1.41   | 0.2351 |
| SOX4 | rs1744896   | 21681103 | A,G | 0.5038 | 0.9407 | 0.082  | 0.069 | 1.4012 | 0.2365 |
| SOX4 | rs74785728  | 21611723 | G,A | 0.9819 | 0.9332 | -0.282 | 0.239 | 1.398  | 0.2371 |
| SOX4 | rs1744894   | 21680886 | T,C | 0.4962 | 0.9953 | 0.079  | 0.067 | 1.3916 | 0.2381 |
| SOX4 | rs113196987 | 21575419 | A,G | 0.9232 | 0.5162 | -0.18  | 0.153 | 1.3818 | 0.2398 |
| SOX4 | rs9466136   | 21653258 | C,T | 0.905  | 0.8569 | -0.123 | 0.105 | 1.3793 | 0.2402 |
| SOX4 | rs9466127   | 21602745 | G,A | 0.9739 | 0.9906 | -0.213 | 0.182 | 1.3754 | 0.2409 |
| SOX4 | rs1740868   | 21660205 | G,T | 0.6798 | 0.8487 | -0.084 | 0.071 | 1.3736 | 0.2412 |
| SOX4 | rs1740858   | 21682180 | C,T | 0.507  | 0.8636 | 0.084  | 0.072 | 1.3625 | 0.2431 |
| SOX4 | rs1740857   | 21681617 | T,G | 0.5067 | 0.8693 | 0.084  | 0.072 | 1.3601 | 0.2435 |
| SOX4 | rs1740859   | 21682298 | C,T | 0.5072 | 0.8627 | 0.084  | 0.072 | 1.3588 | 0.2437 |
| SOX4 | rs62403974  | 21713978 | T,C | 0.7736 | 0.9053 | -0.089 | 0.077 | 1.3524 | 0.2449 |
| SOX4 | rs1740861   | 21678006 | T,C | 0.5038 | 0.9738 | 0.076  | 0.066 | 1.3375 | 0.2475 |
| SOX4 | rs116104882 | 21654116 | G,C | 0.9607 | 0.7845 | -0.222 | 0.193 | 1.3199 | 0.2506 |
| SOX4 | rs145648458 | 21636404 | T,C | 0.9762 | 0.7475 | -0.252 | 0.22  | 1.3121 | 0.252  |
| SOX4 | rs138585583 | 21678890 | R,D | 0.8749 | 0.9014 | -0.1   | 0.087 | 1.3074 | 0.2529 |
| SOX4 | rs142641808 | 21677158 | C,T | 0.9656 | 0.7625 | -0.242 | 0.212 | 1.3047 | 0.2533 |
| SOX4 | rs1744891   | 21679835 | G,A | 0.5058 | 0.9872 | 0.075  | 0.066 | 1.3006 | 0.2541 |
| SOX4 | rs1740846   | 21621045 | A,G | 0.6874 | 0.9924 | -0.075 | 0.066 | 1.2979 | 0.2546 |
| SOX4 | rs6941630   | 21679102 | C,T | 0.5039 | 0.9783 | 0.075  | 0.066 | 1.2964 | 0.2549 |
| SOX4 | rs147268567 | 21621169 | D,R | 0.6874 | 0.993  | -0.075 | 0.066 | 1.293  | 0.2555 |
| SOX4 | rs397888201 | 21681363 | R,D | 0.4982 | 0.7168 | 0.09   | 0.079 | 1.2924 | 0.2556 |
| SOX4 | rs113989215 | 21665766 | A,C | 0.9131 | 0.855  | -0.123 | 0.109 | 1.2927 | 0.2556 |
| SOX4 | rs1744852   | 21621724 | A,G | 0.6871 | 0.9927 | -0.075 | 0.066 | 1.2884 | 0.2563 |
| SOX4 | rs149019701 | 21621670 | D,R | 0.6874 | 0.9939 | -0.075 | 0.066 | 1.2868 | 0.2566 |
| SOX4 | rs1740845   | 21621731 | G,A | 0.6871 | 0.9929 | -0.075 | 0.066 | 1.2868 | 0.2566 |
| SOX4 | rs34987769  | 21678839 | R,I | 0.5043 | 0.9785 | 0.075  | 0.066 | 1.2834 | 0.2573 |
| SOX4 | rs542285387 | 21621459 | I,R | 0.6862 | 0.9884 | -0.074 | 0.066 | 1.2748 | 0.2589 |
| SOX4 | rs139032454 | 21644326 | A,C | 0.9757 | 0.7441 | -0.248 | 0.221 | 1.2643 | 0.2608 |
| SOX4 | rs12200574  | 21683353 | G,A | 0.5092 | 0.842  | 0.081  | 0.072 | 1.2642 | 0.2609 |
| SOX4 | rs9466133   | 21643948 | C,T | 0.9757 | 0.7442 | -0.248 | 0.221 | 1.2612 | 0.2614 |
| SOX4 | rs9460656   | 21643907 | A,G | 0.9758 | 0.7442 | -0.248 | 0.221 | 1.2599 | 0.2617 |
| SOX4 | rs11961107  | 21642740 | G,A | 0.9758 | 0.7454 | -0.247 | 0.221 | 1.2555 | 0.2625 |

|      |             |          |     |        |        |        |       |        |        |
|------|-------------|----------|-----|--------|--------|--------|-------|--------|--------|
| SOX4 | rs150184400 | 21642793 | T,C | 0.9758 | 0.7454 | -0.247 | 0.221 | 1.2555 | 0.2625 |
| SOX4 | rs12332790  | 21642505 | C,T | 0.9758 | 0.7456 | -0.247 | 0.221 | 1.254  | 0.2628 |
| SOX4 | rs2759362   | 21681885 | G,A | 0.5173 | 0.8653 | 0.078  | 0.071 | 1.2348 | 0.2665 |
| SOX4 | rs4712620   | 21554898 | A,C | 0.6509 | 0.3847 | -0.11  | 0.099 | 1.2338 | 0.2667 |
| SOX4 | rs9295515   | 21641667 | C,T | 0.976  | 0.7495 | -0.244 | 0.22  | 1.232  | 0.267  |
| SOX4 | rs146150526 | 21575243 | T,C | 0.9263 | 0.5346 | -0.169 | 0.153 | 1.2251 | 0.2684 |
| SOX4 | rs12333154  | 21640855 | G,A | 0.976  | 0.751  | -0.243 | 0.22  | 1.2251 | 0.2684 |
| SOX4 | rs9460657   | 21660051 | C,T | 0.8938 | 0.8161 | -0.114 | 0.103 | 1.2224 | 0.2689 |
| SOX4 | rs147273446 | 21638982 | C,G | 0.9761 | 0.7533 | -0.242 | 0.219 | 1.2205 | 0.2693 |
| SOX4 | rs10155733  | 21639594 | C,T | 0.9761 | 0.7534 | -0.242 | 0.22  | 1.2202 | 0.2693 |
| SOX4 | rs11966675  | 21640125 | G,A | 0.9761 | 0.7522 | -0.243 | 0.22  | 1.2205 | 0.2693 |
| SOX4 | rs10155732  | 21639540 | C,T | 0.9761 | 0.7536 | -0.242 | 0.219 | 1.2197 | 0.2694 |
| SOX4 | rs138882930 | 21638300 | A,G | 0.9761 | 0.7432 | -0.244 | 0.221 | 1.22   | 0.2694 |
| SOX4 | rs114977922 | 21638119 | C,G | 0.9762 | 0.7437 | -0.244 | 0.221 | 1.2194 | 0.2695 |
| SOX4 | rs148317817 | 21638986 | G,A | 0.9761 | 0.7532 | -0.242 | 0.219 | 1.2187 | 0.2696 |
| SOX4 | rs1740848   | 21620293 | G,A | 0.6882 | 0.9886 | -0.073 | 0.066 | 1.2167 | 0.27   |
| SOX4 | rs1740847   | 21620469 | C,A | 0.6882 | 0.9889 | -0.073 | 0.066 | 1.2141 | 0.2705 |
| SOX4 | rs13215657  | 21683714 | C,T | 0.511  | 0.7765 | 0.083  | 0.075 | 1.2103 | 0.2713 |
| SOX4 | rs13219202  | 21683982 | G,A | 0.5273 | 0.7259 | 0.087  | 0.079 | 1.2092 | 0.2715 |
| SOX4 | rs527350470 | 21640569 | R,D | 0.9745 | 0.7043 | -0.241 | 0.22  | 1.1993 | 0.2735 |
| SOX4 | rs7742225   | 21685474 | G,A | 0.827  | 0.7132 | -0.106 | 0.097 | 1.1967 | 0.274  |
| SOX4 | rs1740865   | 21668071 | C,A | 0.5314 | 0.8949 | 0.077  | 0.071 | 1.1877 | 0.2758 |
| SOX4 | rs7763048   | 21681780 | G,A | 0.4974 | 0.8635 | 0.077  | 0.072 | 1.1472 | 0.2841 |
| SOX4 | rs13219086  | 21683929 | G,C | 0.5137 | 0.7654 | 0.081  | 0.076 | 1.1418 | 0.2853 |
| SOX4 | rs1740853   | 21684065 | G,A | 0.5152 | 0.7328 | 0.082  | 0.077 | 1.1326 | 0.2872 |
| SOX4 | rs548416728 | 21647978 | R,D | 0.9747 | 0.6618 | -0.245 | 0.234 | 1.0958 | 0.2952 |
| SOX4 | rs80230506  | 21655914 | C,A | 0.9607 | 0.7829 | -0.2   | 0.192 | 1.0894 | 0.2966 |
| SOX4 | rs1740831   | 21647589 | G,A | 0.7131 | 0.9772 | -0.076 | 0.073 | 1.088  | 0.2969 |
| SOX4 | rs531584400 | 21574100 | R,D | 0.9506 | 0.471  | -0.214 | 0.205 | 1.0841 | 0.2978 |
| SOX4 | rs941990    | 21658881 | A,G | 0.6778 | 0.8561 | -0.073 | 0.07  | 1.08   | 0.2987 |
| SOX4 | rs2749681   | 21683792 | A,G | 0.5085 | 0.771  | 0.078  | 0.075 | 1.0793 | 0.2989 |
| SOX4 | rs73378032  | 21744446 | C,A | 0.9796 | 0.3201 | 0.352  | 0.339 | 1.0763 | 0.2995 |
| SOX4 | rs36024930  | 21605537 | R,D | 0.7795 | 0.8154 | -0.087 | 0.084 | 1.076  | 0.2996 |
| SOX4 | rs59015153  | 21574306 | T,A | 0.9504 | 0.4712 | -0.211 | 0.204 | 1.0685 | 0.3013 |
| SOX4 | rs112524196 | 21743604 | G,A | 0.9794 | 0.3214 | 0.348  | 0.337 | 1.0626 | 0.3026 |
| SOX4 | rs12183824  | 21726382 | G,A | 0.8184 | 0.3562 | -0.137 | 0.133 | 1.0609 | 0.303  |
| SOX4 | rs116300170 | 21663541 | G,A | 0.9641 | 0.8099 | -0.204 | 0.198 | 1.0565 | 0.304  |
| SOX4 | rs185494084 | 21636537 | T,C | 0.9884 | 0.4475 | -0.494 | 0.482 | 1.0504 | 0.3054 |
| SOX4 | rs73737565  | 21664442 | T,G | 0.9768 | 0.5564 | -0.267 | 0.262 | 1.0362 | 0.3087 |
| SOX4 | rs571632729 | 21726382 | R,I | 0.896  | 0.3926 | -0.163 | 0.16  | 1.0359 | 0.3088 |
| SOX4 | rs9350367   | 21555608 | C,T | 0.6563 | 0.3839 | -0.102 | 0.1   | 1.0281 | 0.3106 |
| SOX4 | rs111232506 | 21744922 | C,T | 0.9798 | 0.3015 | 0.355  | 0.35  | 1.0262 | 0.3111 |
| SOX4 | rs75994264  | 21745903 | C,T | 0.9868 | 0.3369 | 0.437  | 0.433 | 1.0202 | 0.3125 |
| SOX4 | rs77155105  | 21682861 | C,G | 0.9671 | 0.7117 | -0.225 | 0.223 | 1.0185 | 0.3129 |
| SOX4 | rs116697959 | 21668594 | A,T | 0.9652 | 0.8312 | -0.2   | 0.198 | 1.0162 | 0.3134 |

|      |             |          |     |        |        |        |       |        |        |
|------|-------------|----------|-----|--------|--------|--------|-------|--------|--------|
| SOX4 | rs74492370  | 21679606 | G,A | 0.9678 | 0.8228 | -0.21  | 0.208 | 1.0123 | 0.3143 |
| SOX4 | rs78971333  | 21679601 | C,T | 0.9678 | 0.8229 | -0.21  | 0.208 | 1.0115 | 0.3145 |
| SOX4 | rs6456439   | 21645743 | T,G | 0.7125 | 0.9939 | -0.073 | 0.072 | 1.0099 | 0.3149 |
| SOX4 | rs76934110  | 21669629 | G,A | 0.9626 | 0.7982 | -0.197 | 0.196 | 1.0062 | 0.3158 |
| SOX4 | rs60368679  | 21746134 | C,T | 0.9868 | 0.3206 | 0.443  | 0.443 | 1.0033 | 0.3165 |
| SOX4 | rs75509154  | 21670162 | A,G | 0.9656 | 0.8408 | -0.198 | 0.198 | 1.0003 | 0.3172 |
| SOX4 | rs66647983  | 21633079 | R,D | 0.5368 | 0.3749 | 0.102  | 0.102 | 0.9992 | 0.3175 |
| SOX4 | rs7771671   | 21662524 | T,G | 0.9284 | 0.8382 | -0.125 | 0.126 | 0.9897 | 0.3198 |
| SOX4 | rs6456442   | 21698279 | T,C | 0.5821 | 0.821  | -0.068 | 0.068 | 0.9885 | 0.3201 |
| SOX4 | rs9460668   | 21727929 | C,G | 0.8216 | 0.9705 | -0.086 | 0.086 | 0.9882 | 0.3202 |
| SOX4 | rs7751397   | 21662535 | C,T | 0.9285 | 0.8402 | -0.125 | 0.126 | 0.9871 | 0.3205 |
| SOX4 | rs147488932 | 21672276 | G,A | 0.9657 | 0.8442 | -0.195 | 0.198 | 0.9733 | 0.3239 |
| SOX4 | rs60908846  | 21646239 | I,R | 0.758  | 0.8675 | -0.079 | 0.08  | 0.9626 | 0.3265 |
| SOX4 | rs9295514   | 21636585 | A,G | 0.7107 | 0.9234 | -0.073 | 0.075 | 0.9592 | 0.3274 |
| SOX4 | rs79002033  | 21706995 | C,T | 0.9739 | 0.6771 | -0.226 | 0.232 | 0.9485 | 0.3301 |
| SOX4 | rs35001920  | 21676726 | R,D | 0.4775 | 0.9497 | 0.067  | 0.069 | 0.9435 | 0.3314 |
| SOX4 | rs1744886   | 21671092 | A,T | 0.5151 | 0.9725 | 0.066  | 0.068 | 0.9418 | 0.3318 |
| SOX4 | rs72317305  | 21669872 | R,D | 0.5156 | 0.9662 | 0.066  | 0.068 | 0.9388 | 0.3326 |
| SOX4 | rs75157802  | 21678178 | A,G | 0.9675 | 0.834  | -0.198 | 0.204 | 0.937  | 0.3331 |
| SOX4 | rs59759742  | 21707319 | T,G | 0.6009 | 0.9285 | -0.062 | 0.064 | 0.9313 | 0.3345 |
| SOX4 | rs115252874 | 21601345 | A,C | 0.9891 | 0.6163 | 0.351  | 0.364 | 0.9293 | 0.335  |
| SOX4 | rs118074543 | 21601297 | C,G | 0.9891 | 0.6166 | 0.35   | 0.364 | 0.9267 | 0.3357 |
| SOX4 | rs1740833   | 21646435 | A,G | 0.6798 | 0.9621 | -0.066 | 0.068 | 0.9264 | 0.3358 |
| SOX4 | rs79693897  | 21695822 | R,D | 0.6627 | 0.717  | -0.075 | 0.079 | 0.9176 | 0.3381 |
| SOX4 | rs1744880   | 21653046 | A,G | 0.6868 | 0.9845 | -0.063 | 0.066 | 0.9165 | 0.3384 |
| SOX4 | rs79847215  | 21560355 | C,A | 0.9848 | 0.3334 | -0.381 | 0.399 | 0.9119 | 0.3396 |
| SOX4 | rs369470901 | 21707320 | R,I | 0.6014 | 0.9269 | -0.062 | 0.065 | 0.9085 | 0.3405 |
| SOX4 | rs9466156   | 21711491 | C,T | 0.5874 | 0.9998 | -0.059 | 0.062 | 0.9059 | 0.3412 |
| SOX4 | rs116443937 | 21600982 | A,T | 0.9889 | 0.6106 | 0.345  | 0.363 | 0.9052 | 0.3414 |
| SOX4 | rs62403977  | 21725337 | C,T | 0.8232 | 0.9705 | -0.083 | 0.087 | 0.901  | 0.3425 |
| SOX4 | rs34810044  | 21718703 | R,D | 0.7721 | 0.9072 | -0.071 | 0.075 | 0.9005 | 0.3426 |
| SOX4 | rs9466140   | 21673293 | A,G | 0.9286 | 0.9271 | -0.11  | 0.117 | 0.8847 | 0.3469 |
| SOX4 | rs1744856   | 21625895 | G,A | 0.6341 | 0.4717 | 0.09   | 0.096 | 0.8843 | 0.347  |
| SOX4 | rs147795739 | 21606396 | C,G | 0.9894 | 0.6082 | 0.349  | 0.371 | 0.8825 | 0.3475 |
| SOX4 | rs35612989  | 21663201 | R,I | 0.4311 | 0.4511 | 0.088  | 0.094 | 0.882  | 0.3477 |
| SOX4 | rs76401928  | 21586715 | G,A | 0.9419 | 0.6097 | -0.153 | 0.162 | 0.8819 | 0.3477 |
| SOX4 | rs111503674 | 21585461 | T,C | 0.941  | 0.5927 | -0.153 | 0.164 | 0.8787 | 0.3485 |
| SOX4 | rs79521243  | 21581049 | T,C | 0.9405 | 0.5684 | -0.155 | 0.166 | 0.8705 | 0.3508 |
| SOX4 | rs7753451   | 21607833 | T,C | 0.9894 | 0.606  | 0.347  | 0.372 | 0.8691 | 0.3512 |
| SOX4 | rs9466158   | 21717309 | T,C | 0.7892 | 0.921  | -0.073 | 0.079 | 0.8631 | 0.3529 |
| SOX4 | rs201389513 | 21635326 | D,R | 0.7672 | 0.8696 | -0.075 | 0.081 | 0.8626 | 0.353  |
| SOX4 | rs9466164   | 21723538 | A,G | 0.8284 | 0.9494 | -0.083 | 0.089 | 0.8621 | 0.3532 |
| SOX4 | rs11968460  | 21718604 | G,A | 0.8056 | 0.9024 | -0.078 | 0.086 | 0.8293 | 0.3625 |
| SOX4 | rs150071402 | 21610552 | G,A | 0.9896 | 0.5952 | 0.347  | 0.381 | 0.8293 | 0.3625 |
| SOX4 | rs73392015  | 21591766 | C,T | 0.9671 | 0.4088 | 0.255  | 0.281 | 0.8211 | 0.3649 |

|      |             |          |     |        |        |        |       |        |        |
|------|-------------|----------|-----|--------|--------|--------|-------|--------|--------|
| SOX4 | rs7772337   | 21726278 | C,T | 0.8256 | 0.9612 | -0.08  | 0.088 | 0.8194 | 0.3654 |
| SOX4 | rs9460660   | 21709294 | T,C | 0.616  | 0.9365 | -0.059 | 0.066 | 0.803  | 0.3702 |
| SOX4 | rs16885105  | 21598981 | C,T | 0.9309 | 0.9869 | -0.109 | 0.122 | 0.7978 | 0.3717 |
| SOX4 | rs6921422   | 21600523 | C,A | 0.9308 | 0.9908 | -0.109 | 0.122 | 0.7958 | 0.3723 |
| SOX4 | rs9466124   | 21599700 | A,G | 0.9309 | 0.9964 | -0.109 | 0.122 | 0.7959 | 0.3723 |
| SOX4 | rs7775506   | 21729962 | C,T | 0.4216 | 0.9976 | 0.054  | 0.06  | 0.795  | 0.3726 |
| SOX4 | rs117396734 | 21615374 | A,T | 0.9894 | 0.5869 | 0.338  | 0.38  | 0.7951 | 0.3726 |
| SOX4 | rs11965374  | 21629739 | T,G | 0.9653 | 0.7623 | -0.172 | 0.194 | 0.7906 | 0.3739 |
| SOX4 | rs11281983  | 21600430 | R,I | 0.9309 | 0.9934 | -0.108 | 0.122 | 0.7893 | 0.3743 |
| SOX4 | rs11757166  | 21652990 | C,T | 0.6883 | 0.9879 | -0.058 | 0.066 | 0.7775 | 0.3779 |
| SOX4 | rs7772163   | 21726011 | G,C | 0.8088 | 0.9857 | -0.073 | 0.083 | 0.7764 | 0.3783 |
| SOX4 | rs112617138 | 21576898 | A,G | 0.938  | 0.5193 | -0.148 | 0.169 | 0.7697 | 0.3803 |
| SOX4 | rs1622043   | 21609285 | A,G | 0.6925 | 0.9814 | -0.058 | 0.067 | 0.7678 | 0.3809 |
| SOX4 | rs9466163   | 21723532 | C,T | 0.809  | 0.9768 | -0.072 | 0.083 | 0.7576 | 0.3841 |
| SOX4 | rs1744879   | 21652741 | A,G | 0.6892 | 0.9997 | -0.057 | 0.066 | 0.7562 | 0.3845 |
| SOX4 | rs6926491   | 21724670 | G,A | 0.8091 | 0.9926 | -0.072 | 0.083 | 0.7557 | 0.3847 |
| SOX4 | rs112243204 | 21582142 | T,C | 0.9498 | 0.5703 | -0.151 | 0.174 | 0.7518 | 0.3859 |
| SOX4 | rs116258702 | 21618081 | C,T | 0.9891 | 0.5647 | 0.33   | 0.381 | 0.7482 | 0.387  |
| SOX4 | rs9466125   | 21601156 | A,G | 0.9295 | 0.9574 | -0.106 | 0.123 | 0.7427 | 0.3888 |
| SOX4 | rs1740837   | 21633917 | C,T | 0.6783 | 0.9174 | -0.06  | 0.07  | 0.7413 | 0.3892 |
| SOX4 | rs1617781   | 21608766 | A,G | 0.693  | 0.9819 | -0.057 | 0.067 | 0.7337 | 0.3917 |
| SOX4 | rs77625474  | 21604127 | G,T | 0.9308 | 0.9762 | -0.103 | 0.121 | 0.7246 | 0.3946 |
| SOX4 | rs6925679   | 21724480 | A,G | 0.8086 | 1      | -0.07  | 0.082 | 0.7222 | 0.3954 |
| SOX4 | rs147276150 | 21701200 | A,G | 0.9274 | 0.4176 | -0.165 | 0.195 | 0.7203 | 0.396  |
| SOX4 | rs9466165   | 21724322 | T,C | 0.8089 | 0.9953 | -0.07  | 0.083 | 0.7166 | 0.3973 |
| SOX4 | rs77401992  | 21579608 | A,G | 0.9474 | 0.5364 | -0.149 | 0.176 | 0.7155 | 0.3976 |
| SOX4 | rs2251647   | 21677746 | C,A | 0.9512 | 0.9786 | 0.129  | 0.153 | 0.7133 | 0.3984 |
| SOX4 | rs9460665   | 21724144 | G,A | 0.8084 | 1      | -0.069 | 0.082 | 0.7071 | 0.4004 |
| SOX4 | rs10080820  | 21655815 | C,G | 0.983  | 0.7561 | -0.212 | 0.252 | 0.7065 | 0.4006 |
| SOX4 | rs75228175  | 21579117 | C,T | 0.9479 | 0.5358 | -0.148 | 0.177 | 0.7041 | 0.4014 |
| SOX4 | rs75122426  | 21580566 | T,C | 0.985  | 0.6235 | -0.253 | 0.302 | 0.6989 | 0.4032 |
| SOX4 | rs59187080  | 21668625 | G,A | 0.966  | 0.7875 | -0.148 | 0.177 | 0.6985 | 0.4033 |
| SOX4 | rs9295516   | 21673560 | C,T | 0.9483 | 0.8605 | -0.113 | 0.136 | 0.6978 | 0.4035 |
| SOX4 | rs73737557  | 21570448 | T,C | 0.9333 | 0.4619 | -0.145 | 0.174 | 0.6907 | 0.4059 |
| SOX4 | rs2749683   | 21635327 | T,G | 0.767  | 0.8784 | -0.067 | 0.081 | 0.6871 | 0.4072 |
| SOX4 | rs1744861   | 21627986 | A,T | 0.3793 | 0.9676 | 0.053  | 0.064 | 0.686  | 0.4075 |
| SOX4 | rs61197304  | 21570213 | G,A | 0.9581 | 0.4232 | -0.19  | 0.229 | 0.6854 | 0.4077 |
| SOX4 | rs9460664   | 21723621 | G,A | 0.8102 | 0.9858 | -0.069 | 0.083 | 0.6836 | 0.4084 |
| SOX4 | rs1744882   | 21657561 | T,G | 0.7003 | 0.8473 | -0.061 | 0.073 | 0.6825 | 0.4087 |
| SOX4 | rs557872691 | 21603474 | R,D | 0.8825 | 0.5572 | -0.102 | 0.124 | 0.6811 | 0.4092 |
| SOX4 | rs60459153  | 21570941 | G,A | 0.9572 | 0.4198 | -0.188 | 0.228 | 0.6813 | 0.4092 |
| SOX4 | rs141765572 | 21679089 | G,T | 0.9877 | 0.5484 | 0.334  | 0.405 | 0.6794 | 0.4098 |
| SOX4 | rs10080752  | 21655608 | C,G | 0.9819 | 0.7225 | -0.206 | 0.251 | 0.6724 | 0.4122 |
| SOX4 | rs1740835   | 21637725 | G,A | 0.7724 | 0.8961 | -0.066 | 0.081 | 0.6713 | 0.4126 |
| SOX4 | rs1989470   | 21715067 | T,A | 0.5732 | 0.9562 | -0.051 | 0.063 | 0.6697 | 0.4131 |

|      |             |          |     |        |        |        |       |        |        |
|------|-------------|----------|-----|--------|--------|--------|-------|--------|--------|
| SOX4 | rs4712631   | 21710896 | C,T | 0.586  | 0.9993 | -0.05  | 0.062 | 0.6697 | 0.4132 |
| SOX4 | rs60048426  | 21556513 | G,A | 0.947  | 0.5576 | -0.133 | 0.163 | 0.6662 | 0.4144 |
| SOX4 | rs9466141   | 21673993 | C,T | 0.9236 | 0.9976 | -0.089 | 0.109 | 0.6658 | 0.4145 |
| SOX4 | rs10946462  | 21651830 | C,T | 0.6894 | 0.9828 | -0.054 | 0.066 | 0.6634 | 0.4153 |
| SOX4 | rs2749688   | 21658487 | G,C | 0.6992 | 0.8356 | -0.06  | 0.074 | 0.6633 | 0.4154 |
| SOX4 | rs62406884  | 21696308 | C,T | 0.9205 | 0.414  | -0.149 | 0.183 | 0.6616 | 0.416  |
| SOX4 | rs1972212   | 21743761 | C,T | 0.8703 | 0.5142 | -0.109 | 0.135 | 0.6534 | 0.4189 |
| SOX4 | rs840985    | 21744508 | G,A | 0.5605 | 0.3093 | -0.088 | 0.109 | 0.6524 | 0.4192 |
| SOX4 | rs4712632   | 21732137 | G,A | 0.4138 | 0.9644 | 0.05   | 0.062 | 0.6513 | 0.4196 |
| SOX4 | rs76714354  | 21572464 | A,G | 0.9805 | 0.3806 | -0.273 | 0.341 | 0.6431 | 0.4226 |
| SOX4 | rs112653724 | 21576915 | G,A | 0.9388 | 0.5234 | -0.136 | 0.169 | 0.6415 | 0.4232 |
| SOX4 | rs1740834   | 21645207 | C,T | 0.7742 | 0.9378 | -0.063 | 0.079 | 0.6411 | 0.4233 |
| SOX4 | rs9368325   | 21577508 | C,T | 0.8604 | 0.347  | -0.121 | 0.151 | 0.6397 | 0.4238 |
| SOX4 | rs11361021  | 21608909 | D,R | 0.6928 | 0.9683 | -0.054 | 0.067 | 0.6363 | 0.425  |
| SOX4 | rs1740826   | 21651528 | G,A | 0.6892 | 0.9762 | -0.053 | 0.067 | 0.6306 | 0.4271 |
| SOX4 | rs78265086  | 21720541 | T,C | 0.9826 | 0.8636 | -0.177 | 0.223 | 0.6276 | 0.4282 |
| SOX4 | rs7759991   | 21609547 | C,T | 0.6977 | 0.9669 | -0.053 | 0.068 | 0.6245 | 0.4294 |
| SOX4 | rs1744848   | 21609563 | C,T | 0.6977 | 0.9669 | -0.053 | 0.068 | 0.6239 | 0.4296 |
| SOX4 | rs1744877   | 21651554 | T,C | 0.6891 | 0.9768 | -0.052 | 0.067 | 0.6208 | 0.4307 |
| SOX4 | rs12333123  | 21640660 | G,A | 0.9848 | 0.7705 | -0.211 | 0.268 | 0.6168 | 0.4322 |
| SOX4 | rs11753001  | 21726506 | T,C | 0.9147 | 0.5112 | -0.128 | 0.162 | 0.6166 | 0.4323 |
| SOX4 | rs562901644 | 21554922 | R,D | 0.9157 | 0.7168 | -0.095 | 0.121 | 0.6149 | 0.4329 |
| SOX4 | rs74329629  | 21583401 | G,A | 0.9656 | 0.5138 | -0.187 | 0.24  | 0.6115 | 0.4342 |
| SOX4 | rs59493338  | 21646242 | T,A | 0.701  | 0.8468 | -0.059 | 0.075 | 0.6057 | 0.4364 |
| SOX4 | rs116239840 | 21722970 | A,C | 0.8218 | 0.9134 | -0.069 | 0.088 | 0.602  | 0.4378 |
| SOX4 | rs9466161   | 21722916 | T,C | 0.7866 | 0.8907 | -0.06  | 0.078 | 0.6014 | 0.438  |
| SOX4 | rs558880181 | 21699974 | R,D | 0.9241 | 0.5575 | -0.103 | 0.134 | 0.5945 | 0.4407 |
| SOX4 | rs150235785 | 21638293 | G,A | 0.9849 | 0.7598 | -0.207 | 0.27  | 0.5919 | 0.4417 |
| SOX4 | rs6925119   | 21701083 | G,A | 0.6412 | 0.822  | -0.055 | 0.072 | 0.5883 | 0.4431 |
| SOX4 | rs116342166 | 21630548 | T,C | 0.9891 | 0.5558 | 0.295  | 0.387 | 0.5806 | 0.4461 |
| SOX4 | rs56050802  | 21555539 | C,T | 0.8664 | 0.6128 | -0.077 | 0.102 | 0.5672 | 0.4514 |
| SOX4 | rs1744855   | 21623715 | G,A | 0.3803 | 0.9708 | 0.048  | 0.064 | 0.5662 | 0.4518 |
| SOX4 | rs7773111   | 21696531 | G,A | 0.6146 | 0.751  | -0.056 | 0.074 | 0.5653 | 0.4521 |
| SOX4 | rs571788443 | 21558875 | R,D | 0.8581 | 0.3304 | -0.098 | 0.131 | 0.5572 | 0.4554 |
| SOX4 | rs185847252 | 21676018 | G,A | 0.9496 | 0.8487 | -0.102 | 0.138 | 0.5511 | 0.4579 |
| SOX4 | rs141898580 | 21709985 | C,T | 0.9816 | 0.8379 | -0.164 | 0.221 | 0.551  | 0.4579 |
| SOX4 | rs113932195 | 21562740 | T,C | 0.9088 | 0.469  | -0.102 | 0.138 | 0.5503 | 0.4582 |
| SOX4 | rs56004640  | 21716262 | A,G | 0.8113 | 0.9096 | -0.064 | 0.086 | 0.55   | 0.4583 |
| SOX4 | rs115733488 | 21695961 | T,C | 0.9892 | 0.5305 | -0.235 | 0.318 | 0.5466 | 0.4597 |
| SOX4 | rs79853707  | 21699451 | C,T | 0.986  | 0.5502 | -0.207 | 0.28  | 0.5461 | 0.4599 |
| SOX4 | rs150345835 | 21568080 | R,D | 0.983  | 0.3784 | -0.27  | 0.366 | 0.5448 | 0.4605 |
| SOX4 | rs75179770  | 21568397 | C,T | 0.9582 | 0.4017 | -0.173 | 0.235 | 0.544  | 0.4608 |
| SOX4 | rs73737558  | 21577723 | A,G | 0.9837 | 0.4293 | -0.259 | 0.352 | 0.5414 | 0.4619 |
| SOX4 | rs78686872  | 21566786 | T,C | 0.9087 | 0.4686 | -0.101 | 0.138 | 0.5355 | 0.4643 |
| SOX4 | rs78225455  | 21566785 | T,A | 0.9087 | 0.4686 | -0.101 | 0.138 | 0.5343 | 0.4648 |

|      |             |          |     |        |        |        |       |        |        |
|------|-------------|----------|-----|--------|--------|--------|-------|--------|--------|
| SOX4 | rs549313068 | 21638634 | R,D | 0.9854 | 0.7268 | 0.233  | 0.319 | 0.5334 | 0.4652 |
| SOX4 | rs35528538  | 21613493 | R,D | 0.8281 | 0.9642 | -0.063 | 0.086 | 0.5302 | 0.4665 |
| SOX4 | rs9466169   | 21746181 | A,G | 0.8659 | 0.4166 | -0.108 | 0.148 | 0.5298 | 0.4667 |
| SOX4 | rs9466168   | 21734750 | C,T | 0.8215 | 0.9954 | -0.06  | 0.083 | 0.5274 | 0.4677 |
| SOX4 | rs62404141  | 21614140 | G,A | 0.8281 | 0.9622 | -0.063 | 0.086 | 0.526  | 0.4683 |
| SOX4 | rs9466154   | 21706155 | G,T | 0.6423 | 0.8816 | -0.05  | 0.07  | 0.5255 | 0.4685 |
| SOX4 | rs60336041  | 21714991 | A,C | 0.9818 | 0.9007 | -0.157 | 0.217 | 0.5211 | 0.4704 |
| SOX4 | rs7740486   | 21714797 | A,G | 0.9818 | 0.8978 | -0.157 | 0.217 | 0.5203 | 0.4707 |
| SOX4 | rs530522537 | 21694259 | R,D | 0.9305 | 0.6164 | -0.105 | 0.146 | 0.5196 | 0.471  |
| SOX4 | rs574039752 | 21629819 | R,D | 0.3639 | 0.9279 | 0.048  | 0.067 | 0.5144 | 0.4732 |
| SOX4 | rs5874825   | 21634749 | I,R | 0.7699 | 0.8924 | -0.058 | 0.08  | 0.5141 | 0.4734 |
| SOX4 | rs9460659   | 21696569 | G,C | 0.6689 | 0.7266 | -0.056 | 0.079 | 0.5118 | 0.4743 |
| SOX4 | rs111355896 | 21649454 | I,R | 0.7486 | 0.9074 | -0.056 | 0.078 | 0.5117 | 0.4744 |
| SOX4 | rs1740836   | 21634644 | G,A | 0.7705 | 0.8935 | -0.057 | 0.08  | 0.5103 | 0.475  |
| SOX4 | rs1740838   | 21632759 | G,T | 0.3851 | 0.7571 | 0.052  | 0.073 | 0.507  | 0.4764 |
| SOX4 | rs6456440   | 21658236 | C,A | 0.9344 | 0.7776 | -0.09  | 0.127 | 0.5069 | 0.4765 |
| SOX4 | rs139581361 | 21722128 | G,A | 0.9879 | 0.8119 | -0.225 | 0.317 | 0.5054 | 0.4771 |
| SOX4 | rs34954830  | 21632488 | R,I | 0.9584 | 0.5469 | -0.138 | 0.194 | 0.5048 | 0.4774 |
| SOX4 | rs111928162 | 21706372 | T,C | 0.9868 | 0.6035 | -0.195 | 0.274 | 0.5039 | 0.4778 |
| SOX4 | rs113183700 | 21702524 | A,G | 0.9869 | 0.5842 | -0.198 | 0.28  | 0.5019 | 0.4787 |
| SOX4 | rs16885205  | 21743291 | T,C | 0.8644 | 0.5834 | -0.088 | 0.124 | 0.5007 | 0.4792 |
| SOX4 | rs111374956 | 21699545 | G,C | 0.9871 | 0.5681 | -0.202 | 0.285 | 0.4989 | 0.48   |
| SOX4 | rs6456443   | 21716233 | G,A | 0.9818 | 0.9202 | -0.152 | 0.216 | 0.4982 | 0.4803 |
| SOX4 | rs73376077  | 21720504 | C,T | 0.7969 | 0.9025 | -0.059 | 0.083 | 0.494  | 0.4821 |
| SOX4 | rs7757467   | 21718123 | C,T | 0.9813 | 0.9676 | -0.147 | 0.21  | 0.4908 | 0.4836 |
| SOX4 | rs9460671   | 21731289 | G,C | 0.41   | 0.9868 | 0.044  | 0.063 | 0.4879 | 0.4849 |
| SOX4 | rs7751661   | 21621850 | G,A | 0.6705 | 1      | -0.045 | 0.065 | 0.4872 | 0.4852 |
| SOX4 | rs11438117  | 21660100 | R,I | 0.4211 | 0.4868 | 0.063  | 0.091 | 0.4867 | 0.4854 |
| SOX4 | rs58919806  | 21570038 | G,A | 0.8921 | 0.397  | -0.097 | 0.14  | 0.4859 | 0.4858 |
| SOX4 | rs7753199   | 21717706 | G,A | 0.9819 | 0.9391 | -0.149 | 0.215 | 0.4845 | 0.4864 |
| SOX4 | rs7757232   | 21717818 | G,A | 0.9819 | 0.9404 | -0.149 | 0.215 | 0.4828 | 0.4871 |
| SOX4 | rs7739666   | 21718260 | T,C | 0.9818 | 0.939  | -0.148 | 0.214 | 0.4774 | 0.4896 |
| SOX4 | rs35829440  | 21655243 | R,I | 0.602  | 0.3134 | 0.079  | 0.115 | 0.476  | 0.4903 |
| SOX4 | rs35487983  | 21739331 | R,D | 0.6885 | 0.8315 | 0.05   | 0.072 | 0.4757 | 0.4904 |
| SOX4 | rs9466153   | 21700048 | C,T | 0.9445 | 0.5887 | -0.105 | 0.152 | 0.4753 | 0.4906 |
| SOX4 | rs200822534 | 21701029 | R,D | 0.6386 | 0.6957 | -0.055 | 0.08  | 0.4725 | 0.4918 |
| SOX4 | rs114750919 | 21725361 | C,G | 0.9867 | 0.8444 | 0.189  | 0.276 | 0.4704 | 0.4928 |
| SOX4 | rs199690993 | 21646009 | R,D | 0.9762 | 0.3058 | -0.232 | 0.338 | 0.4705 | 0.4928 |
| SOX4 | rs111479343 | 21561070 | G,T | 0.9092 | 0.4694 | -0.094 | 0.138 | 0.4675 | 0.4941 |
| SOX4 | rs145960980 | 21729330 | D,R | 0.4093 | 0.9758 | 0.043  | 0.063 | 0.4675 | 0.4942 |
| SOX4 | rs9466159   | 21721313 | A,G | 0.8227 | 0.9323 | -0.061 | 0.089 | 0.465  | 0.4953 |
| SOX4 | rs58572340  | 21555505 | T,A | 0.8729 | 0.5846 | -0.073 | 0.107 | 0.4622 | 0.4966 |
| SOX4 | rs56175726  | 21566498 | G,A | 0.9534 | 0.3503 | -0.163 | 0.239 | 0.4623 | 0.4966 |
| SOX4 | rs9366408   | 21742607 | G,A | 0.9822 | 0.9856 | -0.133 | 0.196 | 0.4619 | 0.4967 |
| SOX4 | rs74926222  | 21568994 | C,T | 0.9816 | 0.3776 | -0.238 | 0.352 | 0.4576 | 0.4987 |

|      |             |          |     |        |        |        |       |        |        |
|------|-------------|----------|-----|--------|--------|--------|-------|--------|--------|
| SOX4 | rs9466143   | 21676688 | A,T | 0.943  | 0.8542 | -0.089 | 0.132 | 0.4538 | 0.5005 |
| SOX4 | rs138387168 | 21716280 | C,T | 0.9765 | 0.7359 | -0.158 | 0.235 | 0.4535 | 0.5007 |
| SOX4 | rs5874829   | 21738740 | R,I | 0.8074 | 0.7675 | -0.061 | 0.091 | 0.4513 | 0.5017 |
| SOX4 | rs78714768  | 21631590 | C,T | 0.9845 | 0.8158 | -0.168 | 0.251 | 0.4463 | 0.5041 |
| SOX4 | rs9460651   | 21622531 | G,T | 0.672  | 0.9951 | -0.044 | 0.065 | 0.4456 | 0.5044 |
| SOX4 | rs149768565 | 21719941 | R,D | 0.9754 | 0.6872 | -0.144 | 0.216 | 0.4449 | 0.5047 |
| SOX4 | rs1740842   | 21623181 | G,A | 0.6726 | 0.9885 | -0.044 | 0.066 | 0.4435 | 0.5054 |
| SOX4 | rs1744854   | 21623686 | C,T | 0.6725 | 0.9882 | -0.044 | 0.066 | 0.4434 | 0.5055 |
| SOX4 | rs138691949 | 21653247 | A,T | 0.9812 | 0.5466 | -0.201 | 0.302 | 0.4422 | 0.5061 |
| SOX4 | rs1744853   | 21623386 | A,G | 0.6725 | 0.9887 | -0.044 | 0.066 | 0.4419 | 0.5062 |
| SOX4 | rs6933476   | 21720156 | G,A | 0.9819 | 0.8936 | -0.145 | 0.218 | 0.4415 | 0.5064 |
| SOX4 | rs79883278  | 21720741 | C,T | 0.9819 | 0.8353 | -0.147 | 0.221 | 0.4396 | 0.5073 |
| SOX4 | rs571708107 | 21634038 | D,R | 0.6795 | 0.8686 | -0.048 | 0.072 | 0.4377 | 0.5082 |
| SOX4 | rs9368332   | 21731094 | G,A | 0.4156 | 0.9974 | 0.041  | 0.062 | 0.4374 | 0.5084 |
| SOX4 | rs9466144   | 21676886 | G,T | 0.943  | 0.852  | -0.087 | 0.132 | 0.4338 | 0.5102 |
| SOX4 | rs1740844   | 21622871 | C,T | 0.6724 | 0.9911 | -0.043 | 0.066 | 0.4335 | 0.5103 |
| SOX4 | rs534329540 | 21629251 | R,I | 0.4972 | 0.5784 | 0.055  | 0.084 | 0.4326 | 0.5107 |
| SOX4 | rs561391795 | 21725044 | R,D | 0.9346 | 0.4431 | 0.113  | 0.173 | 0.4294 | 0.5123 |
| SOX4 | rs147045541 | 21675767 | C,T | 0.9834 | 0.576  | -0.198 | 0.303 | 0.428  | 0.513  |
| SOX4 | rs114455294 | 21693186 | A,T | 0.9731 | 0.5546 | -0.149 | 0.228 | 0.4266 | 0.5136 |
| SOX4 | rs9368326   | 21590104 | A,G | 0.8056 | 0.5535 | -0.069 | 0.105 | 0.4249 | 0.5145 |
| SOX4 | rs35857450  | 21622415 | D,R | 0.6703 | 0.8902 | -0.045 | 0.069 | 0.4233 | 0.5153 |
| SOX4 | rs7759495   | 21706044 | G,A | 0.6142 | 0.9046 | -0.043 | 0.067 | 0.421  | 0.5165 |
| SOX4 | rs4616978   | 21606129 | G,A | 0.8111 | 0.9353 | -0.053 | 0.083 | 0.4176 | 0.5181 |
| SOX4 | rs142355149 | 21692662 | A,C | 0.9804 | 0.36   | -0.252 | 0.393 | 0.4124 | 0.5208 |
| SOX4 | rs7744188   | 21694601 | T,C | 0.9149 | 0.6416 | -0.08  | 0.125 | 0.4078 | 0.5231 |
| SOX4 | rs73374447  | 21636151 | C,T | 0.9753 | 0.3    | -0.213 | 0.334 | 0.4044 | 0.5248 |
| SOX4 | rs79846403  | 21723244 | C,T | 0.8348 | 0.8403 | -0.061 | 0.096 | 0.4026 | 0.5257 |
| SOX4 | rs149385127 | 21642947 | G,A | 0.9849 | 0.723  | 0.197  | 0.311 | 0.4013 | 0.5264 |
| SOX4 | rs74323084  | 21645152 | C,G | 0.9857 | 0.7691 | 0.195  | 0.31  | 0.3974 | 0.5284 |
| SOX4 | rs1740827   | 21650969 | A,T | 0.7378 | 0.9342 | -0.048 | 0.076 | 0.3894 | 0.5326 |
| SOX4 | rs9368333   | 21743631 | A,C | 0.9748 | 0.5254 | -0.141 | 0.227 | 0.3894 | 0.5326 |
| SOX4 | rs112837708 | 21696451 | G,A | 0.9648 | 0.4436 | -0.135 | 0.217 | 0.3848 | 0.5351 |
| SOX4 | rs1740851   | 21616268 | T,C | 0.7152 | 0.9852 | -0.043 | 0.069 | 0.3841 | 0.5354 |
| SOX4 | rs77991965  | 21694060 | G,A | 0.9358 | 0.6372 | -0.094 | 0.152 | 0.3816 | 0.5368 |
| SOX4 | rs4710981   | 21732702 | G,C | 0.4166 | 0.9635 | 0.038  | 0.062 | 0.3741 | 0.5408 |
| SOX4 | rs11284636  | 21591706 | R,D | 0.9858 | 0.4225 | 0.228  | 0.376 | 0.3676 | 0.5443 |
| SOX4 | rs1322883   | 21720796 | A,G | 0.5867 | 0.9164 | -0.039 | 0.064 | 0.3649 | 0.5458 |
| SOX4 | rs73376030  | 21700390 | T,G | 0.6688 | 0.8019 | -0.045 | 0.075 | 0.3635 | 0.5466 |
| SOX4 | rs113534734 | 21596349 | R,D | 0.9404 | 0.7354 | -0.093 | 0.155 | 0.3596 | 0.5487 |
| SOX4 | rs11380611  | 21703686 | R,I | 0.6704 | 0.84   | -0.044 | 0.074 | 0.3499 | 0.5542 |
| SOX4 | rs4712626   | 21701841 | G,A | 0.6545 | 0.8328 | -0.043 | 0.073 | 0.3467 | 0.556  |
| SOX4 | rs6933506   | 21673857 | T,C | 0.9717 | 0.871  | -0.111 | 0.191 | 0.3405 | 0.5596 |
| SOX4 | rs78378200  | 21647275 | T,C | 0.985  | 0.7319 | 0.179  | 0.309 | 0.3353 | 0.5626 |
| SOX4 | rs116016141 | 21687920 | C,T | 0.988  | 0.5009 | -0.229 | 0.397 | 0.3337 | 0.5635 |



|      |             |          |     |        |        |        |       |        |        |
|------|-------------|----------|-----|--------|--------|--------|-------|--------|--------|
| SOX4 | rs1740832   | 21646725 | A,G | 0.756  | 0.938  | -0.045 | 0.078 | 0.3321 | 0.5644 |
| SOX4 | rs150555050 | 21561633 | G,A | 0.9894 | 0.5125 | -0.214 | 0.372 | 0.3319 | 0.5646 |
| SOX4 | rs4327678   | 21619771 | T,C | 0.7132 | 0.9834 | -0.04  | 0.069 | 0.3311 | 0.565  |
| SOX4 | rs59730691  | 21701056 | C,T | 0.6717 | 0.8117 | -0.043 | 0.075 | 0.3295 | 0.566  |
| SOX4 | rs7761844   | 21701456 | G,A | 0.6722 | 0.8149 | -0.043 | 0.075 | 0.3289 | 0.5663 |
| SOX4 | rs62406887  | 21701319 | C,T | 0.6717 | 0.8135 | -0.043 | 0.075 | 0.3288 | 0.5664 |
| SOX4 | rs112153247 | 21701183 | C,T | 0.6716 | 0.8121 | -0.043 | 0.075 | 0.3275 | 0.5671 |
| SOX4 | rs7761575   | 21701475 | C,T | 0.672  | 0.8148 | -0.043 | 0.075 | 0.3275 | 0.5671 |
| SOX4 | rs13362741  | 21700158 | A,C | 0.6707 | 0.8039 | -0.043 | 0.075 | 0.3253 | 0.5684 |
| SOX4 | rs7762010   | 21701594 | G,A | 0.6719 | 0.8177 | -0.043 | 0.075 | 0.325  | 0.5686 |
| SOX4 | rs7761595   | 21701550 | A,G | 0.6721 | 0.8165 | -0.043 | 0.075 | 0.3249 | 0.5687 |
| SOX4 | rs2180419   | 21728317 | A,G | 0.4028 | 0.9843 | 0.036  | 0.063 | 0.3242 | 0.5691 |
| SOX4 | rs11327351  | 21623643 | D,R | 0.6711 | 0.9267 | -0.039 | 0.069 | 0.3237 | 0.5694 |
| SOX4 | rs10636012  | 21727515 | I,R | 0.4062 | 0.9929 | 0.036  | 0.063 | 0.3207 | 0.5712 |
| SOX4 | rs4712629   | 21702103 | A,G | 0.6716 | 0.83   | -0.042 | 0.074 | 0.319  | 0.5722 |
| SOX4 | rs4712630   | 21702161 | T,C | 0.6716 | 0.8305 | -0.042 | 0.074 | 0.3188 | 0.5723 |
| SOX4 | rs4712627   | 21701892 | C,T | 0.6719 | 0.828  | -0.042 | 0.074 | 0.318  | 0.5728 |
| SOX4 | rs11751574  | 21702901 | G,A | 0.6716 | 0.8382 | -0.042 | 0.074 | 0.3176 | 0.573  |
| SOX4 | rs62403969  | 21702409 | A,C | 0.6716 | 0.8327 | -0.042 | 0.074 | 0.3168 | 0.5736 |
| SOX4 | rs62406886  | 21701119 | T,C | 0.6631 | 0.8167 | -0.042 | 0.074 | 0.3157 | 0.5742 |
| SOX4 | rs1744884   | 21663449 | G,A | 0.7593 | 0.786  | -0.048 | 0.085 | 0.3147 | 0.5748 |
| SOX4 | rs1740867   | 21663105 | C,T | 0.7594 | 0.7883 | -0.047 | 0.085 | 0.3143 | 0.5751 |
| SOX4 | rs7744078   | 21727822 | G,C | 0.4006 | 0.9944 | 0.035  | 0.063 | 0.3139 | 0.5753 |
| SOX4 | rs2328624   | 21703736 | G,C | 0.672  | 0.8448 | -0.041 | 0.073 | 0.3129 | 0.5759 |
| SOX4 | rs6927945   | 21703341 | T,C | 0.672  | 0.841  | -0.041 | 0.074 | 0.3127 | 0.576  |
| SOX4 | rs9460669   | 21729251 | A,G | 0.4053 | 0.9459 | 0.036  | 0.064 | 0.3108 | 0.5772 |
| SOX4 | rs6933751   | 21704108 | T,C | 0.672  | 0.8471 | -0.041 | 0.073 | 0.3104 | 0.5774 |
| SOX4 | rs9466160   | 21722771 | A,G | 0.9736 | 0.8106 | -0.113 | 0.202 | 0.3094 | 0.5781 |
| SOX4 | rs7764209   | 21727755 | A,T | 0.4006 | 0.9953 | 0.035  | 0.063 | 0.3084 | 0.5787 |
| SOX4 | rs2328625   | 21703880 | T,C | 0.6717 | 0.8446 | -0.041 | 0.073 | 0.308  | 0.5789 |
| SOX4 | rs2328626   | 21703885 | C,T | 0.6717 | 0.8448 | -0.041 | 0.073 | 0.308  | 0.5789 |
| SOX4 | rs1744862   | 21629881 | C,A | 0.6612 | 0.9531 | -0.037 | 0.068 | 0.3072 | 0.5794 |
| SOX4 | rs1744863   | 21629887 | A,G | 0.6612 | 0.9532 | -0.037 | 0.068 | 0.3072 | 0.5794 |
| SOX4 | rs57442902  | 21704602 | C,T | 0.6719 | 0.8494 | -0.04  | 0.073 | 0.3053 | 0.5806 |
| SOX4 | rs9466126   | 21601762 | A,C | 0.9836 | 0.9467 | -0.128 | 0.232 | 0.3046 | 0.581  |
| SOX4 | rs1744850   | 21618916 | G,T | 0.7128 | 0.9828 | -0.038 | 0.069 | 0.303  | 0.582  |
| SOX4 | rs1830667   | 21728089 | G,T | 0.4027 | 0.9868 | 0.035  | 0.063 | 0.3025 | 0.5823 |
| SOX4 | rs67418443  | 21554442 | C,T | 0.9266 | 0.876  | -0.063 | 0.116 | 0.2938 | 0.5878 |
| SOX4 | rs146516474 | 21554348 | C,T | 0.9266 | 0.8769 | -0.063 | 0.116 | 0.2931 | 0.5882 |
| SOX4 | rs139419250 | 21696871 | R,I | 0.9475 | 0.5307 | -0.086 | 0.159 | 0.293  | 0.5883 |
| SOX4 | rs6900485   | 21697055 | A,T | 0.9471 | 0.5382 | -0.085 | 0.158 | 0.2922 | 0.5888 |
| SOX4 | rs73392011  | 21569756 | C,T | 0.9671 | 0.445  | 0.129  | 0.239 | 0.2919 | 0.589  |
| SOX4 | rs7740084   | 21727531 | A,G | 0.4005 | 0.9983 | 0.034  | 0.063 | 0.291  | 0.5896 |
| SOX4 | rs6900676   | 21697176 | A,G | 0.9471 | 0.5384 | -0.085 | 0.158 | 0.2907 | 0.5898 |
| SOX4 | rs1407655   | 21727902 | G,A | 0.4028 | 0.9882 | 0.034  | 0.063 | 0.2865 | 0.5925 |

|      |             |          |     |        |        |        |       |        |        |
|------|-------------|----------|-----|--------|--------|--------|-------|--------|--------|
| SOX4 | rs76944255  | 21582643 | G,A | 0.981  | 0.4687 | -0.171 | 0.32  | 0.2861 | 0.5928 |
| SOX4 | rs7754999   | 21705723 | C,T | 0.6691 | 0.8543 | -0.039 | 0.073 | 0.2842 | 0.5939 |
| SOX4 | rs9466155   | 21707222 | G,A | 0.6726 | 0.8766 | -0.038 | 0.072 | 0.2821 | 0.5954 |
| SOX4 | rs114266456 | 21633347 | G,A | 0.9661 | 0.7099 | -0.111 | 0.208 | 0.2818 | 0.5955 |
| SOX4 | rs150766348 | 21706424 | R,D | 0.6681 | 0.8073 | -0.04  | 0.075 | 0.2817 | 0.5956 |
| SOX4 | rs145778004 | 21696926 | R,I | 0.9468 | 0.5319 | -0.084 | 0.158 | 0.2817 | 0.5956 |
| SOX4 | rs1853345   | 21742346 | T,C | 0.73   | 0.9808 | 0.035  | 0.066 | 0.2799 | 0.5968 |
| SOX4 | rs111526226 | 21567385 | T,C | 0.968  | 0.4673 | 0.123  | 0.236 | 0.27   | 0.6033 |
| SOX4 | rs2749682   | 21641716 | A,G | 0.6939 | 0.947  | -0.037 | 0.072 | 0.2694 | 0.6037 |
| SOX4 | rs80061387  | 21579793 | T,C | 0.9808 | 0.4585 | -0.167 | 0.322 | 0.2681 | 0.6046 |
| SOX4 | rs55686449  | 21702505 | T,C | 0.6687 | 0.8289 | -0.038 | 0.074 | 0.2652 | 0.6065 |
| SOX4 | rs1744851   | 21619810 | T,C | 0.7153 | 0.9819 | -0.036 | 0.069 | 0.2643 | 0.6072 |
| SOX4 | rs1740825   | 21653689 | T,C | 0.7477 | 0.8767 | -0.04  | 0.078 | 0.2636 | 0.6076 |
| SOX4 | rs1744865   | 21631078 | A,C | 0.6628 | 0.9515 | -0.035 | 0.068 | 0.262  | 0.6087 |
| SOX4 | rs148261621 | 21712086 | R,I | 0.7162 | 0.7178 | -0.043 | 0.083 | 0.2601 | 0.6101 |
| SOX4 | rs6904795   | 21703099 | A,G | 0.6649 | 0.8486 | -0.037 | 0.073 | 0.2588 | 0.611  |
| SOX4 | rs36093392  | 21601725 | D,R | 0.7127 | 0.8142 | -0.037 | 0.074 | 0.255  | 0.6136 |
| SOX4 | rs68015368  | 21645499 | I,R | 0.8315 | 0.7435 | -0.049 | 0.097 | 0.2524 | 0.6154 |
| SOX4 | rs116216476 | 21700308 | T,C | 0.9886 | 0.6467 | -0.165 | 0.329 | 0.252  | 0.6157 |
| SOX4 | rs78474141  | 21604475 | G,T | 0.9839 | 0.9516 | -0.112 | 0.225 | 0.2485 | 0.6181 |
| SOX4 | rs78345714  | 21734098 | T,C | 0.9849 | 0.6839 | -0.131 | 0.265 | 0.2463 | 0.6197 |
| SOX4 | rs1740840   | 21627378 | G,A | 0.7156 | 0.9808 | -0.034 | 0.069 | 0.246  | 0.6199 |
| SOX4 | rs144178641 | 21622568 | C,T | 0.984  | 0.926  | -0.112 | 0.226 | 0.2458 | 0.6201 |
| SOX4 | rs77354845  | 21621783 | A,G | 0.9841 | 0.9371 | -0.11  | 0.225 | 0.2416 | 0.6231 |
| SOX4 | rs1740850   | 21618925 | C,G | 0.7147 | 0.9839 | -0.034 | 0.069 | 0.2393 | 0.6247 |
| SOX4 | rs78712702  | 21700242 | T,A | 0.9843 | 0.4664 | 0.189  | 0.388 | 0.2364 | 0.6268 |
| SOX4 | rs4712628   | 21702070 | C,G | 0.6704 | 0.828  | -0.036 | 0.074 | 0.2361 | 0.6271 |
| SOX4 | rs77273443  | 21620705 | G,A | 0.984  | 0.938  | -0.109 | 0.224 | 0.2354 | 0.6276 |
| SOX4 | rs62403971  | 21702621 | T,C | 0.6704 | 0.8339 | -0.036 | 0.074 | 0.2322 | 0.6299 |
| SOX4 | rs148775927 | 21677832 | C,G | 0.9884 | 0.5129 | 0.218  | 0.452 | 0.2319 | 0.6301 |
| SOX4 | rs9466129   | 21610137 | C,G | 0.9838 | 0.9565 | -0.105 | 0.222 | 0.2227 | 0.637  |
| SOX4 | rs16885170  | 21716554 | G,A | 0.8229 | 0.9708 | 0.038  | 0.08  | 0.222  | 0.6376 |
| SOX4 | rs73737568  | 21667546 | A,G | 0.9719 | 0.8789 | -0.089 | 0.189 | 0.2206 | 0.6386 |
| SOX4 | rs7760462   | 21730877 | G,C | 0.4165 | 0.9846 | 0.028  | 0.062 | 0.2107 | 0.6462 |
| SOX4 | rs76475505  | 21611890 | T,G | 0.9837 | 0.9609 | -0.101 | 0.22  | 0.2097 | 0.647  |
| SOX4 | rs1744872   | 21638599 | C,T | 0.7505 | 0.8975 | -0.036 | 0.079 | 0.2073 | 0.6489 |
| SOX4 | rs1744871   | 21638566 | C,T | 0.7505 | 0.8974 | -0.036 | 0.079 | 0.207  | 0.6492 |
| SOX4 | rs1744873   | 21638871 | C,T | 0.7506 | 0.8981 | -0.036 | 0.079 | 0.2059 | 0.65   |
| SOX4 | rs113975012 | 21712110 | A,T | 0.9843 | 0.5172 | -0.164 | 0.363 | 0.2053 | 0.6505 |
| SOX4 | rs9460650   | 21615371 | T,C | 0.9841 | 0.9776 | -0.099 | 0.22  | 0.2035 | 0.6519 |
| SOX4 | rs78584681  | 21743570 | R,D | 0.7497 | 0.6177 | 0.04   | 0.088 | 0.2034 | 0.652  |
| SOX4 | rs10643502  | 21641556 | T,C | 0.688  | 0.853  | -0.033 | 0.074 | 0.1995 | 0.6551 |
| SOX4 | rs9460649   | 21614884 | G,A | 0.9843 | 0.994  | -0.097 | 0.219 | 0.1953 | 0.6586 |
| SOX4 | rs9460655   | 21641564 | C,T | 0.6926 | 0.8571 | -0.032 | 0.074 | 0.1938 | 0.6598 |
| SOX4 | rs7738506   | 21702690 | A,T | 0.9888 | 0.6716 | -0.144 | 0.328 | 0.1931 | 0.6603 |

|      |             |          |     |        |        |        |       |        |        |
|------|-------------|----------|-----|--------|--------|--------|-------|--------|--------|
| SOX4 | rs79753782  | 21594201 | C,A | 0.9506 | 0.6778 | -0.078 | 0.177 | 0.1925 | 0.6608 |
| SOX4 | rs7755254   | 21699892 | C,T | 0.9389 | 0.6037 | -0.063 | 0.143 | 0.1922 | 0.6611 |
| SOX4 | rs7775517   | 21699901 | T,G | 0.9389 | 0.6039 | -0.063 | 0.143 | 0.1922 | 0.6611 |
| SOX4 | rs1744885   | 21670816 | A,G | 0.4476 | 0.9803 | 0.031  | 0.07  | 0.1919 | 0.6613 |
| SOX4 | rs79164129  | 21601917 | T,C | 0.9855 | 0.3283 | 0.201  | 0.459 | 0.1906 | 0.6624 |
| SOX4 | rs141007801 | 21722788 | R,I | 0.8394 | 0.8482 | -0.042 | 0.096 | 0.1875 | 0.665  |
| SOX4 | rs1744859   | 21626395 | T,C | 0.685  | 0.9803 | -0.029 | 0.067 | 0.1838 | 0.6681 |
| SOX4 | rs7739131   | 21727148 | C,T | 0.7149 | 0.9794 | 0.029  | 0.068 | 0.1837 | 0.6682 |
| SOX4 | rs528217121 | 21702677 | R,D | 0.9888 | 0.6785 | -0.14  | 0.327 | 0.1837 | 0.6682 |
| SOX4 | rs1740841   | 21627053 | G,T | 0.6852 | 0.9798 | -0.029 | 0.067 | 0.1827 | 0.6691 |
| SOX4 | rs1744849   | 21612949 | A,G | 0.7238 | 1      | -0.03  | 0.07  | 0.1826 | 0.6691 |
| SOX4 | rs1744858   | 21626190 | T,C | 0.6849 | 0.9807 | -0.029 | 0.067 | 0.1806 | 0.6709 |
| SOX4 | rs117971178 | 21674146 | C,T | 0.9852 | 0.5427 | -0.141 | 0.332 | 0.1806 | 0.6709 |
| SOX4 | rs74831068  | 21693978 | T,C | 0.8189 | 0.778  | -0.039 | 0.092 | 0.1775 | 0.6735 |
| SOX4 | rs2759360   | 21653532 | A,G | 0.7648 | 0.8809 | -0.033 | 0.079 | 0.1766 | 0.6743 |
| SOX4 | rs149455365 | 21553549 | R,D | 0.9357 | 0.9431 | -0.051 | 0.121 | 0.1737 | 0.6768 |
| SOX4 | rs1740830   | 21648615 | C,T | 0.867  | 0.7367 | -0.045 | 0.109 | 0.1708 | 0.6794 |
| SOX4 | rs370328808 | 21641504 | D,R | 0.7285 | 0.8536 | -0.032 | 0.078 | 0.1683 | 0.6816 |
| SOX4 | rs529643978 | 21641557 | D,R | 0.7285 | 0.854  | -0.032 | 0.078 | 0.1682 | 0.6817 |
| SOX4 | rs561593549 | 21641496 | C,T | 0.7285 | 0.8534 | -0.032 | 0.078 | 0.1682 | 0.6817 |
| SOX4 | rs562290828 | 21641555 | D,R | 0.7285 | 0.8538 | -0.032 | 0.078 | 0.1682 | 0.6817 |
| SOX4 | rs113411153 | 21641562 | D,R | 0.7285 | 0.8541 | -0.032 | 0.078 | 0.1681 | 0.6818 |
| SOX4 | rs6928871   | 21697812 | T,C | 0.9391 | 0.571  | -0.06  | 0.147 | 0.1673 | 0.6826 |
| SOX4 | rs76144443  | 21697748 | A,G | 0.9391 | 0.5709 | -0.06  | 0.147 | 0.167  | 0.6828 |
| SOX4 | rs6929045   | 21697861 | T,C | 0.9391 | 0.5712 | -0.06  | 0.147 | 0.1664 | 0.6833 |
| SOX4 | rs6906248   | 21697889 | A,G | 0.9391 | 0.5714 | -0.06  | 0.147 | 0.1657 | 0.684  |
| SOX4 | rs6906888   | 21697966 | G,A | 0.9391 | 0.5729 | -0.06  | 0.147 | 0.1646 | 0.6849 |
| SOX4 | rs6925407   | 21724100 | G,C | 0.9884 | 0.9399 | -0.122 | 0.299 | 0.1647 | 0.6849 |
| SOX4 | rs6929294   | 21698041 | T,G | 0.9394 | 0.5831 | -0.058 | 0.146 | 0.1568 | 0.6921 |
| SOX4 | rs6929483   | 21698094 | T,C | 0.9394 | 0.583  | -0.057 | 0.146 | 0.1554 | 0.6934 |
| SOX4 | rs78030412  | 21631511 | T,C | 0.9731 | 0.7032 | -0.097 | 0.245 | 0.1554 | 0.6934 |
| SOX4 | rs58699714  | 21698897 | C,T | 0.9395 | 0.5888 | -0.057 | 0.145 | 0.1521 | 0.6965 |
| SOX4 | rs112047759 | 21699028 | T,C | 0.9395 | 0.5892 | -0.057 | 0.145 | 0.1514 | 0.6972 |
| SOX4 | rs112103466 | 21699063 | T,C | 0.9395 | 0.5894 | -0.056 | 0.145 | 0.1509 | 0.6977 |
| SOX4 | rs7770799   | 21553258 | A,C | 0.9337 | 0.9722 | -0.046 | 0.119 | 0.1458 | 0.7026 |
| SOX4 | rs79381952  | 21699489 | T,C | 0.9398 | 0.6026 | -0.055 | 0.144 | 0.1427 | 0.7056 |
| SOX4 | rs141253251 | 21567552 | G,A | 0.9772 | 0.4147 | -0.118 | 0.312 | 0.1418 | 0.7065 |
| SOX4 | rs57690989  | 21652353 | T,G | 0.9629 | 0.903  | -0.059 | 0.156 | 0.1413 | 0.707  |
| SOX4 | rs114981716 | 21562453 | G,A | 0.977  | 0.3896 | -0.12  | 0.321 | 0.1385 | 0.7098 |
| SOX4 | rs147960757 | 21606492 | G,T | 0.9772 | 0.8203 | -0.092 | 0.248 | 0.138  | 0.7102 |
| SOX4 | rs75062640  | 21722533 | A,G | 0.9823 | 0.8162 | -0.093 | 0.254 | 0.134  | 0.7143 |
| SOX4 | rs6939472   | 21661019 | G,C | 0.7866 | 0.7792 | -0.032 | 0.089 | 0.1324 | 0.7159 |
| SOX4 | rs35578300  | 21741886 | R,D | 0.7077 | 0.8309 | 0.026  | 0.072 | 0.1318 | 0.7165 |
| SOX4 | rs146269383 | 21601263 | G,A | 0.9772 | 0.8168 | -0.09  | 0.248 | 0.1317 | 0.7167 |
| SOX4 | rs76428292  | 21629756 | C,A | 0.974  | 0.7112 | -0.09  | 0.248 | 0.1303 | 0.7182 |

|      |             |          |     |        |        |        |       |        |        |
|------|-------------|----------|-----|--------|--------|--------|-------|--------|--------|
| SOX4 | rs13220312  | 21671856 | A,G | 0.9734 | 0.7398 | -0.079 | 0.222 | 0.1262 | 0.7224 |
| SOX4 | rs1744874   | 21640902 | T,C | 0.7492 | 0.9047 | -0.028 | 0.078 | 0.1255 | 0.7231 |
| SOX4 | rs183503583 | 21638847 | G,A | 0.9885 | 0.5492 | 0.136  | 0.384 | 0.1255 | 0.7231 |
| SOX4 | rs78523587  | 21614133 | G,A | 0.9764 | 0.7872 | -0.088 | 0.249 | 0.1253 | 0.7233 |
| SOX4 | rs35210528  | 21667781 | T,C | 0.9732 | 0.7254 | -0.079 | 0.224 | 0.1244 | 0.7243 |
| SOX4 | rs71563994  | 21668435 | T,C | 0.9731 | 0.7255 | -0.078 | 0.223 | 0.1223 | 0.7266 |
| SOX4 | rs35922627  | 21667988 | A,T | 0.973  | 0.7238 | -0.078 | 0.223 | 0.1212 | 0.7277 |
| SOX4 | rs60309622  | 21698465 | C,T | 0.9414 | 0.5673 | -0.052 | 0.151 | 0.1203 | 0.7287 |
| SOX4 | rs7746995   | 21686064 | G,A | 0.9859 | 0.4629 | -0.13  | 0.381 | 0.1159 | 0.7336 |
| SOX4 | rs201513044 | 21589010 | R,D | 0.9897 | 0.4337 | -0.143 | 0.422 | 0.1155 | 0.734  |
| SOX4 | rs78502915  | 21591248 | G,T | 0.9567 | 0.6759 | -0.062 | 0.186 | 0.1115 | 0.7385 |
| SOX4 | rs2328627   | 21714362 | G,A | 0.9889 | 0.782  | -0.1   | 0.315 | 0.1015 | 0.75   |
| SOX4 | rs2876599   | 21714103 | C,G | 0.9889 | 0.7808 | -0.1   | 0.315 | 0.101  | 0.7507 |
| SOX4 | rs12191413  | 21740465 | A,T | 0.7737 | 0.8456 | 0.025  | 0.08  | 0.1    | 0.7519 |
| SOX4 | rs1740843   | 21623041 | G,A | 0.6876 | 0.9919 | -0.021 | 0.068 | 0.0993 | 0.7527 |
| SOX4 | rs116878740 | 21665291 | A,G | 0.9855 | 0.5757 | -0.104 | 0.329 | 0.0991 | 0.7529 |
| SOX4 | rs78098947  | 21713740 | C,T | 0.989  | 0.7788 | -0.1   | 0.316 | 0.099  | 0.753  |
| SOX4 | rs140643662 | 21664544 | G,A | 0.9855 | 0.5752 | -0.104 | 0.329 | 0.099  | 0.753  |
| SOX4 | rs9460666   | 21726380 | G,A | 0.9296 | 0.3512 | -0.061 | 0.196 | 0.0984 | 0.7537 |
| SOX4 | rs116598598 | 21654884 | A,T | 0.983  | 0.5411 | -0.1   | 0.32  | 0.0971 | 0.7554 |
| SOX4 | rs1740854   | 21680732 | A,C | 0.6112 | 0.9639 | -0.021 | 0.067 | 0.0965 | 0.756  |
| SOX4 | rs547687648 | 21729656 | R,I | 0.7892 | 0.8727 | -0.025 | 0.081 | 0.0953 | 0.7576 |
| SOX4 | rs117537289 | 21661595 | C,T | 0.9854 | 0.5671 | -0.101 | 0.33  | 0.0931 | 0.7603 |
| SOX4 | rs6934807   | 21653677 | A,G | 0.9709 | 0.9814 | -0.054 | 0.176 | 0.093  | 0.7604 |
| SOX4 | rs4712625   | 21699342 | G,A | 0.8761 | 0.9937 | 0.029  | 0.096 | 0.0904 | 0.7636 |
| SOX4 | rs12528435  | 21562732 | G,A | 0.8866 | 0.355  | 0.049  | 0.162 | 0.0904 | 0.7637 |
| SOX4 | rs111404042 | 21565201 | G,A | 0.9548 | 0.5207 | -0.061 | 0.202 | 0.0902 | 0.764  |
| SOX4 | rs1744864   | 21630684 | C,T | 0.7008 | 1      | -0.02  | 0.068 | 0.0898 | 0.7645 |
| SOX4 | rs912025    | 21716058 | C,G | 0.8371 | 0.9358 | 0.025  | 0.084 | 0.0896 | 0.7647 |
| SOX4 | rs7739585   | 21632295 | A,C | 0.6764 | 0.9279 | -0.021 | 0.071 | 0.0884 | 0.7663 |
| SOX4 | rs540918539 | 21717464 | R,D | 0.9882 | 0.804  | -0.09  | 0.305 | 0.0875 | 0.7674 |
| SOX4 | rs116779637 | 21718919 | G,T | 0.9886 | 0.7935 | -0.091 | 0.311 | 0.0852 | 0.7704 |
| SOX4 | rs12374633  | 21654974 | G,A | 0.9698 | 0.9337 | -0.051 | 0.177 | 0.0839 | 0.7721 |
| SOX4 | rs140423760 | 21646093 | C,A | 0.9884 | 0.552  | 0.111  | 0.383 | 0.0837 | 0.7724 |
| SOX4 | rs145907846 | 21729085 | G,A | 0.9868 | 0.8724 | -0.082 | 0.285 | 0.0824 | 0.774  |
| SOX4 | rs57792403  | 21738640 | R,D | 0.4364 | 0.9838 | 0.017  | 0.062 | 0.0782 | 0.7798 |
| SOX4 | rs182063949 | 21738643 | T,A | 0.9864 | 0.6453 | 0.086  | 0.314 | 0.075  | 0.7842 |
| SOX4 | rs78937245  | 21738761 | C,T | 0.9864 | 0.6447 | 0.085  | 0.314 | 0.0733 | 0.7866 |
| SOX4 | rs7746424   | 21685920 | C,T | 0.9762 | 0.4981 | 0.077  | 0.286 | 0.0732 | 0.7868 |
| SOX4 | rs76857610  | 21685543 | G,T | 0.9888 | 0.4734 | 0.112  | 0.416 | 0.0723 | 0.788  |
| SOX4 | rs13211544  | 21619214 | C,A | 0.8478 | 0.3133 | 0.04   | 0.15  | 0.0712 | 0.7896 |
| SOX4 | rs73374488  | 21666188 | G,A | 0.9707 | 0.8902 | -0.049 | 0.184 | 0.0708 | 0.7902 |
| SOX4 | rs7738599   | 21631790 | A,G | 0.9365 | 0.4203 | 0.055  | 0.208 | 0.0702 | 0.7911 |
| SOX4 | rs840982    | 21740321 | T,C | 0.4378 | 0.9967 | 0.016  | 0.062 | 0.0692 | 0.7925 |
| SOX4 | rs7739607   | 21632345 | G,C | 0.6821 | 0.9067 | -0.019 | 0.072 | 0.0689 | 0.793  |

|      |             |          |     |        |        |        |       |        |        |
|------|-------------|----------|-----|--------|--------|--------|-------|--------|--------|
| SOX4 | rs1744876   | 21651003 | T,C | 0.8157 | 0.9901 | 0.021  | 0.082 | 0.0686 | 0.7933 |
| SOX4 | rs77258728  | 21734254 | G,A | 0.9872 | 0.709  | 0.081  | 0.31  | 0.0687 | 0.7933 |
| SOX4 | rs147596047 | 21733524 | R,D | 0.9872 | 0.709  | 0.081  | 0.31  | 0.0681 | 0.7941 |
| SOX4 | rs75935729  | 21733252 | C,A | 0.9872 | 0.709  | 0.081  | 0.31  | 0.0676 | 0.7949 |
| SOX4 | rs80309179  | 21644884 | G,T | 0.9894 | 0.4434 | 0.13   | 0.508 | 0.066  | 0.7972 |
| SOX4 | rs201453060 | 21648925 | R,I | 0.5221 | 0.4872 | 0.024  | 0.094 | 0.0653 | 0.7983 |
| SOX4 | rs9358450   | 21740882 | A,G | 0.746  | 0.858  | 0.019  | 0.074 | 0.0637 | 0.8008 |
| SOX4 | rs7746292   | 21685907 | A,G | 0.9762 | 0.4817 | 0.073  | 0.291 | 0.0627 | 0.8023 |
| SOX4 | rs111482236 | 21588455 | T,C | 0.9537 | 0.6111 | -0.048 | 0.192 | 0.0618 | 0.8036 |
| SOX4 | rs117804382 | 21656810 | C,T | 0.9855 | 0.5625 | -0.082 | 0.333 | 0.061  | 0.8049 |
| SOX4 | rs78584490  | 21732145 | C,T | 0.9872 | 0.7096 | 0.076  | 0.309 | 0.0607 | 0.8054 |
| SOX4 | rs149746556 | 21731479 | R,D | 0.9872 | 0.7098 | 0.076  | 0.309 | 0.0605 | 0.8057 |
| SOX4 | rs1744887   | 21674378 | G,T | 0.9679 | 0.3275 | 0.071  | 0.29  | 0.0602 | 0.8062 |
| SOX4 | rs71563995  | 21676342 | A,G | 0.9697 | 0.7188 | -0.052 | 0.216 | 0.0592 | 0.8078 |
| SOX4 | rs11433545  | 21672216 | R,I | 0.5947 | 0.6034 | 0.021  | 0.088 | 0.0589 | 0.8083 |
| SOX4 | rs116187696 | 21639646 | G,A | 0.9868 | 0.5351 | 0.089  | 0.368 | 0.0583 | 0.8091 |
| SOX4 | rs840981    | 21740238 | G,A | 0.4381 | 1      | 0.015  | 0.061 | 0.0576 | 0.8104 |
| SOX4 | rs1620996   | 21602552 | C,T | 0.8959 | 0.8139 | 0.026  | 0.112 | 0.0561 | 0.8128 |
| SOX4 | rs1744875   | 21648534 | C,A | 0.4998 | 0.4732 | 0.022  | 0.096 | 0.0524 | 0.819  |
| SOX4 | rs9466145   | 21677060 | A,C | 0.6171 | 1      | -0.015 | 0.065 | 0.0515 | 0.8205 |
| SOX4 | rs144306476 | 21721932 | T,G | 0.989  | 0.6617 | -0.077 | 0.349 | 0.0487 | 0.8254 |
| SOX4 | rs1740860   | 21678055 | T,C | 0.7991 | 0.7824 | -0.019 | 0.089 | 0.0463 | 0.8297 |
| SOX4 | rs1744889   | 21676795 | A,G | 0.6165 | 0.9936 | -0.014 | 0.066 | 0.0459 | 0.8304 |
| SOX4 | rs11330136  | 21629471 | D,R | 0.7    | 0.9778 | -0.015 | 0.069 | 0.0458 | 0.8305 |
| SOX4 | rs1740828   | 21649085 | A,G | 0.5436 | 0.4642 | 0.02   | 0.093 | 0.0455 | 0.8311 |
| SOX4 | rs1744890   | 21678059 | A,G | 0.8017 | 0.7924 | -0.019 | 0.089 | 0.0447 | 0.8325 |
| SOX4 | rs1740866   | 21664729 | T,G | 0.7801 | 0.807  | -0.018 | 0.088 | 0.0421 | 0.8373 |
| SOX4 | rs61215435  | 21721256 | C,T | 0.9893 | 0.7083 | -0.065 | 0.327 | 0.0399 | 0.8416 |
| SOX4 | rs59880840  | 21556245 | G,A | 0.9598 | 0.3138 | -0.055 | 0.275 | 0.0398 | 0.8418 |
| SOX4 | rs61157774  | 21556217 | C,T | 0.9598 | 0.3134 | -0.054 | 0.275 | 0.0391 | 0.8432 |
| SOX4 | rs145825998 | 21695945 | T,G | 0.9899 | 0.5601 | 0.08   | 0.405 | 0.0386 | 0.8443 |
| SOX4 | rs1744847   | 21695888 | C,T | 0.9409 | 0.4743 | 0.037  | 0.191 | 0.038  | 0.8455 |
| SOX4 | rs149699118 | 21633666 | D,R | 0.7515 | 0.8935 | -0.015 | 0.078 | 0.0356 | 0.8504 |
| SOX4 | rs561618338 | 21639342 | R,I | 0.9855 | 0.4795 | 0.069  | 0.373 | 0.0347 | 0.8523 |
| SOX4 | rs80035391  | 21685357 | G,A | 0.8973 | 0.5163 | -0.026 | 0.139 | 0.0345 | 0.8525 |
| SOX4 | rs115395409 | 21696639 | C,T | 0.99   | 0.5674 | 0.074  | 0.404 | 0.034  | 0.8538 |
| SOX4 | rs7772692   | 21696544 | A,G | 0.9472 | 0.5318 | -0.031 | 0.168 | 0.0332 | 0.8555 |
| SOX4 | rs6456438   | 21632215 | G,A | 0.7029 | 0.9547 | -0.013 | 0.07  | 0.0331 | 0.8556 |
| SOX4 | rs141900910 | 21647244 | C,T | 0.9864 | 0.543  | 0.066  | 0.366 | 0.0327 | 0.8566 |
| SOX4 | rs201884896 | 21657694 | D,R | 0.9455 | 0.3238 | -0.045 | 0.255 | 0.0306 | 0.8611 |
| SOX4 | rs7754702   | 21696403 | T,C | 0.9482 | 0.5267 | -0.029 | 0.171 | 0.0292 | 0.8642 |
| SOX4 | rs375807437 | 21686609 | R,D | 0.5634 | 0.7421 | 0.012  | 0.072 | 0.0292 | 0.8644 |
| SOX4 | rs1740852   | 21608979 | T,C | 0.895  | 0.9932 | 0.017  | 0.1   | 0.029  | 0.8648 |
| SOX4 | rs78471563  | 21679073 | T,A | 0.9895 | 0.9404 | -0.053 | 0.316 | 0.0281 | 0.8668 |
| SOX4 | rs2749684   | 21676485 | C,T | 0.6168 | 0.9872 | -0.011 | 0.066 | 0.027  | 0.8694 |

|      |             |          |     |        |        |        |       |        |        |
|------|-------------|----------|-----|--------|--------|--------|-------|--------|--------|
| SOX4 | rs112101248 | 21683625 | T,C | 0.9893 | 0.5442 | 0.059  | 0.36  | 0.0265 | 0.8708 |
| SOX4 | rs1744870   | 21638485 | A,C | 0.734  | 0.9006 | -0.012 | 0.077 | 0.0257 | 0.8727 |
| SOX4 | rs61661762  | 21588463 | A,G | 0.9883 | 0.3149 | -0.081 | 0.504 | 0.0257 | 0.8727 |
| SOX4 | rs200447839 | 21689115 | R,D | 0.8701 | 0.7188 | -0.017 | 0.108 | 0.0245 | 0.8757 |
| SOX4 | rs76257188  | 21688091 | T,G | 0.8712 | 0.7018 | -0.017 | 0.11  | 0.0238 | 0.8774 |
| SOX4 | rs77518511  | 21690391 | A,G | 0.9839 | 0.4553 | -0.055 | 0.359 | 0.0238 | 0.8774 |
| SOX4 | rs1973987   | 21687659 | G,T | 0.8711 | 0.6956 | -0.017 | 0.11  | 0.0229 | 0.8797 |
| SOX4 | rs117538721 | 21647180 | T,C | 0.986  | 0.5245 | 0.055  | 0.366 | 0.0223 | 0.8814 |
| SOX4 | rs71563992  | 21655825 | G,T | 0.9888 | 0.8713 | -0.047 | 0.319 | 0.0218 | 0.8825 |
| SOX4 | rs1740863   | 21670641 | C,T | 0.6246 | 0.9994 | 0.01   | 0.067 | 0.0214 | 0.8837 |
| SOX4 | rs5874828   | 21692948 | R,D | 0.8716 | 0.725  | -0.016 | 0.108 | 0.0214 | 0.8837 |
| SOX4 | rs141673420 | 21695454 | T,C | 0.9835 | 0.3745 | -0.061 | 0.42  | 0.0208 | 0.8852 |
| SOX4 | rs78278852  | 21688571 | G,A | 0.9753 | 0.5113 | 0.04   | 0.277 | 0.0204 | 0.8863 |
| SOX4 | rs142460847 | 21687632 | A,G | 0.9751 | 0.5044 | 0.039  | 0.278 | 0.0196 | 0.8885 |
| SOX4 | rs148767257 | 21687606 | C,T | 0.9752 | 0.5064 | 0.039  | 0.278 | 0.0194 | 0.8891 |
| SOX4 | rs57761609  | 21683420 | D,R | 0.6127 | 0.8292 | -0.01  | 0.072 | 0.0194 | 0.8892 |
| SOX4 | rs145952396 | 21677173 | C,T | 0.9854 | 0.5637 | -0.046 | 0.332 | 0.0192 | 0.8899 |
| SOX4 | rs77992585  | 21687331 | G,A | 0.8724 | 0.6862 | -0.015 | 0.112 | 0.0179 | 0.8936 |
| SOX4 | rs12524788  | 21690518 | T,G | 0.8725 | 0.7375 | -0.014 | 0.108 | 0.0178 | 0.894  |
| SOX4 | rs115180462 | 21686653 | G,C | 0.9752 | 0.5032 | 0.037  | 0.279 | 0.0178 | 0.894  |
| SOX4 | rs7747757   | 21686714 | C,T | 0.9752 | 0.5035 | 0.037  | 0.278 | 0.0175 | 0.8947 |
| SOX4 | rs7746895   | 21686168 | C,A | 0.9752 | 0.5028 | 0.036  | 0.279 | 0.017  | 0.8961 |
| SOX4 | rs1321253   | 21689813 | T,A | 0.8723 | 0.7273 | -0.014 | 0.109 | 0.0169 | 0.8965 |
| SOX4 | rs79684204  | 21687368 | A,C | 0.9748 | 0.5098 | 0.035  | 0.274 | 0.0162 | 0.8987 |
| SOX4 | rs75629001  | 21689221 | C,T | 0.8716 | 0.708  | -0.014 | 0.11  | 0.0155 | 0.9009 |
| SOX4 | rs113889001 | 21695381 | A,C | 0.9496 | 0.5091 | -0.022 | 0.18  | 0.0147 | 0.9034 |
| SOX4 | rs7746432   | 21685933 | C,T | 0.9755 | 0.5041 | 0.034  | 0.28  | 0.0144 | 0.9046 |
| SOX4 | rs144222210 | 21726206 | C,T | 0.987  | 0.7975 | 0.036  | 0.307 | 0.0137 | 0.9069 |
| SOX4 | rs79232286  | 21689146 | G,A | 0.8483 | 0.7428 | -0.012 | 0.101 | 0.0136 | 0.907  |
| SOX4 | rs80349490  | 21615188 | T,C | 0.9491 | 0.4807 | -0.025 | 0.222 | 0.0125 | 0.9111 |
| SOX4 | rs1744860   | 21627046 | A,G | 0.6998 | 0.9875 | -0.007 | 0.069 | 0.0118 | 0.9136 |
| SOX4 | rs1744857   | 21626067 | T,C | 0.6993 | 0.9886 | -0.007 | 0.069 | 0.0112 | 0.9157 |
| SOX4 | rs1744878   | 21652230 | A,C | 0.8076 | 0.9338 | -0.009 | 0.085 | 0.0108 | 0.9173 |
| SOX4 | rs6912946   | 21659978 | A,T | 0.8051 | 0.821  | -0.009 | 0.09  | 0.0105 | 0.9183 |
| SOX4 | rs111928481 | 21648542 | T,A | 0.9738 | 0.8848 | 0.02   | 0.201 | 0.0103 | 0.9191 |
| SOX4 | rs1555287   | 21686091 | G,A | 0.5629 | 0.8575 | 0.006  | 0.067 | 0.0088 | 0.9253 |
| SOX4 | rs7754895   | 21696533 | T,C | 0.9459 | 0.5325 | -0.015 | 0.165 | 0.008  | 0.9288 |
| SOX4 | rs111405274 | 21694954 | A,G | 0.9508 | 0.5151 | -0.016 | 0.183 | 0.008  | 0.9288 |
| SOX4 | rs1973986   | 21687571 | A,T | 0.5557 | 0.8895 | 0.006  | 0.066 | 0.0078 | 0.9294 |
| SOX4 | rs79337490  | 21695025 | T,C | 0.9508 | 0.5151 | -0.016 | 0.183 | 0.0079 | 0.9294 |
| SOX4 | rs66735249  | 21686666 | D,R | 0.551  | 0.8357 | 0.006  | 0.068 | 0.0077 | 0.9303 |
| SOX4 | rs545611803 | 21688770 | R,I | 0.8158 | 0.533  | -0.009 | 0.108 | 0.0065 | 0.9356 |
| SOX4 | rs75051132  | 21589799 | T,A | 0.98   | 0.6365 | 0.022  | 0.305 | 0.0054 | 0.9415 |
| SOX4 | rs2181318   | 21691468 | T,C | 0.549  | 0.9168 | 0.005  | 0.065 | 0.0051 | 0.9431 |
| SOX4 | rs1475149   | 21688142 | G,A | 0.5662 | 0.9247 | 0.004  | 0.065 | 0.0047 | 0.9451 |

|      |             |          |     |        |        |        |       |        |        |
|------|-------------|----------|-----|--------|--------|--------|-------|--------|--------|
| SOX4 | rs146017644 | 21640727 | C,T | 0.9833 | 0.5529 | 0.021  | 0.326 | 0.004  | 0.9497 |
| SOX4 | rs7772258   | 21686985 | T,C | 0.8466 | 0.7118 | -0.006 | 0.103 | 0.0039 | 0.95   |
| SOX4 | rs143796183 | 21587351 | G,A | 0.9851 | 0.3168 | 0.033  | 0.538 | 0.0038 | 0.9506 |
| SOX4 | rs1740839   | 21629928 | G,A | 0.7114 | 0.9827 | -0.004 | 0.069 | 0.0036 | 0.9518 |
| SOX4 | rs1740864   | 21668282 | G,A | 0.6096 | 0.9094 | 0.004  | 0.069 | 0.003  | 0.9563 |
| SOX4 | rs4710983   | 21734202 | C,T | 0.767  | 0.9462 | -0.004 | 0.073 | 0.003  | 0.9564 |
| SOX4 | rs150435139 | 21707497 | A,G | 0.9874 | 0.4469 | 0.021  | 0.409 | 0.0027 | 0.9585 |
| SOX4 | rs201995762 | 21706002 | R,I | 0.9873 | 0.4393 | 0.02   | 0.411 | 0.0024 | 0.9609 |
| SOX4 | rs1744881   | 21657548 | G,A | 0.8047 | 0.8556 | -0.004 | 0.088 | 0.0021 | 0.9632 |
| SOX4 | rs143393812 | 21633911 | C,T | 0.9816 | 0.5752 | -0.013 | 0.298 | 0.0019 | 0.9657 |
| SOX4 | rs77708052  | 21605375 | C,T | 0.98   | 0.7948 | -0.012 | 0.273 | 0.0018 | 0.966  |
| SOX4 | rs35605844  | 21674022 | D,R | 0.6185 | 0.9309 | -0.003 | 0.069 | 0.0017 | 0.9672 |
| SOX4 | rs4712624   | 21693152 | A,G | 0.843  | 0.7383 | -0.003 | 0.1   | 0.0008 | 0.9776 |
| SOX4 | rs6918842   | 21691009 | C,T | 0.5679 | 0.9924 | -0.001 | 0.062 | 0.0005 | 0.9814 |
| SOX4 | rs78529444  | 21722481 | A,G | 0.9876 | 0.8222 | 0.005  | 0.312 | 0.0003 | 0.9869 |
| SOX4 | rs530398575 | 21733586 | R,I | 0.8629 | 0.4934 | 0.002  | 0.126 | 0.0002 | 0.9878 |
| SOX4 | rs7772335   | 21696185 | C,T | 0.8913 | 0.4593 | -0.002 | 0.144 | 0.0002 | 0.9879 |
| SOX4 | rs115731554 | 21723090 | C,T | 0.9877 | 0.8291 | 0.005  | 0.311 | 0.0002 | 0.9881 |
| SOX4 | rs111357910 | 21723888 | A,G | 0.988  | 0.8511 | 0.004  | 0.311 | 0.0002 | 0.9894 |
| SOX4 | rs1744867   | 21634171 | T,C | 0.7381 | 0.8918 | -0.001 | 0.078 | 0.0002 | 0.9898 |
| SOX4 | rs117061311 | 21683546 | G,A | 0.9853 | 0.4203 | 0.005  | 0.383 | 0.0001 | 0.9903 |
| SOX4 | rs149555362 | 21726144 | T,C | 0.9879 | 0.8456 | 0.003  | 0.311 | 0.0001 | 0.9922 |
| SOX4 | rs4712623   | 21688978 | C,T | 0.638  | 0.848  | -0.001 | 0.068 | 0.0001 | 0.9928 |

**Legend:**

TRAIT: eQTL for which we are testing the marker's association with.

MARKER: SNP being tested.

BP: Base position of marker within chromosome 6.

ALLELES: Allele 1, Allele 2

FREQ1: Frequency of Allele 1

RSQR: Squared correlation between imputed and true genotypes.

EFFECT2: Beta estimate using Allele 2 as the risk allele.

STDERR: Standard error of beta estimate.

CHISQ: Chi-square statistic of association test.

PVALUE: P-value of association test.

**Supplementary Table 2b. Results from eQTL analysis of 6p22 region:  
normal endometrial tissue**

| TRAIT                                                  | MARKER      | BP       | ALLELES | FREQ1  | RSQR   | EFFECT2 | STDERR  | CHISQ  | PVALUE  |
|--------------------------------------------------------|-------------|----------|---------|--------|--------|---------|---------|--------|---------|
| SNP association with <b>CASC15</b> , sorted by p-value |             |          |         |        |        |         |         |        |         |
| CASC15                                                 | rs545611803 | 21688770 | R,I     | 0.8158 | 0.533  | 1.287   | 0.671   | 3.6777 | 0.05514 |
| CASC15                                                 | rs76714354  | 21572464 | A,G     | 0.9805 | 0.3806 | 86.951  | 47.656  | 3.329  | 0.06807 |
| CASC15                                                 | rs74926222  | 21568994 | C,T     | 0.9816 | 0.3776 | 86.545  | 47.443  | 3.3277 | 0.06812 |
| CASC15                                                 | rs80177376  | 21744978 | C,T     | 0.9048 | 0.3545 | 0.877   | 0.481   | 3.3259 | 0.0682  |
| CASC15                                                 | rs73737558  | 21577723 | A,G     | 0.9837 | 0.4293 | 72.47   | 43.444  | 2.7827 | 0.09529 |
| CASC15                                                 | rs150345835 | 21568080 | R,D     | 0.983  | 0.3784 | 74.073  | 45.702  | 2.6269 | 0.1051  |
| CASC15                                                 | rs7772335   | 21696185 | C,T     | 0.8913 | 0.4593 | 1.561   | 0.97    | 2.5929 | 0.1073  |
| CASC15                                                 | rs78584681  | 21743570 | R,D     | 0.7497 | 0.6177 | 0.648   | 0.414   | 2.4505 | 0.1175  |
| CASC15                                                 | rs116779637 | 21718919 | G,T     | 0.9886 | 0.7935 | -235.67 | 151.091 | 2.4329 | 0.1188  |
| CASC15                                                 | rs6925407   | 21724100 | G,C     | 0.9884 | 0.9399 | -13.662 | 8.759   | 2.4329 | 0.1188  |
| CASC15                                                 | rs840985    | 21744508 | G,A     | 0.5605 | 0.3093 | -0.795  | 0.532   | 2.2322 | 0.1352  |
| CASC15                                                 | rs61215435  | 21721256 | C,T     | 0.9893 | 0.7083 | -66.484 | 44.79   | 2.2033 | 0.1377  |
| CASC15                                                 | rs78265086  | 21720541 | T,C     | 0.9826 | 0.8636 | -105.08 | 71.153  | 2.1808 | 0.1397  |
| CASC15                                                 | rs79883278  | 21720741 | C,T     | 0.9819 | 0.8353 | -76.859 | 52.548  | 2.1393 | 0.1436  |
| CASC15                                                 | rs142355149 | 21692662 | A,C     | 0.9804 | 0.36   | 8.946   | 6.32    | 2.0036 | 0.1569  |
| CASC15                                                 | rs6933476   | 21720156 | G,A     | 0.9819 | 0.8936 | -120.77 | 85.908  | 1.9764 | 0.1598  |
| CASC15                                                 | rs1744847   | 21695888 | C,T     | 0.9409 | 0.4743 | 1.439   | 1.046   | 1.8942 | 0.1687  |
| CASC15                                                 | rs141673420 | 21695454 | T,C     | 0.9835 | 0.3745 | -4.593  | 3.348   | 1.8823 | 0.1701  |
| CASC15                                                 | rs73392015  | 21591766 | C,T     | 0.9671 | 0.4088 | 9.202   | 6.973   | 1.7415 | 0.1869  |
| CASC15                                                 | rs74831068  | 21693978 | T,C     | 0.8189 | 0.778  | 0.908   | 0.691   | 1.7252 | 0.189   |
| CASC15                                                 | rs7772258   | 21686985 | T,C     | 0.8466 | 0.7118 | 0.982   | 0.756   | 1.6861 | 0.1941  |
| CASC15                                                 | rs79232286  | 21689146 | G,A     | 0.8483 | 0.7428 | 0.953   | 0.742   | 1.6462 | 0.1995  |
| CASC15                                                 | rs7746995   | 21686064 | G,A     | 0.9859 | 0.4629 | 40.582  | 31.656  | 1.6435 | 0.1999  |
| CASC15                                                 | rs80035391  | 21685357 | G,A     | 0.8973 | 0.5163 | 1.156   | 0.918   | 1.5882 | 0.2076  |
| CASC15                                                 | rs1853345   | 21742346 | T,C     | 0.73   | 0.9808 | 0.389   | 0.31    | 1.5737 | 0.2097  |
| CASC15                                                 | rs4712624   | 21693152 | A,G     | 0.843  | 0.7383 | 0.916   | 0.74    | 1.5332 | 0.2156  |
| CASC15                                                 | rs35578300  | 21741886 | R,D     | 0.7077 | 0.8309 | 0.419   | 0.34    | 1.5131 | 0.2187  |
| CASC15                                                 | rs1321253   | 21689813 | T,A     | 0.8723 | 0.7273 | 0.917   | 0.754   | 1.479  | 0.2239  |
| CASC15                                                 | rs12524788  | 21690518 | T,G     | 0.8725 | 0.7375 | 0.905   | 0.748   | 1.4652 | 0.2261  |
| CASC15                                                 | rs35210528  | 21667781 | T,C     | 0.9732 | 0.7254 | -115.19 | 95.517  | 1.4543 | 0.2278  |
| CASC15                                                 | rs1973987   | 21687659 | G,T     | 0.8711 | 0.6956 | 0.924   | 0.77    | 1.4388 | 0.2303  |
| CASC15                                                 | rs77992585  | 21687331 | G,A     | 0.8724 | 0.6862 | 0.927   | 0.778   | 1.4196 | 0.2335  |
| CASC15                                                 | rs200447839 | 21689115 | R,D     | 0.8701 | 0.7188 | 0.895   | 0.753   | 1.4126 | 0.2346  |
| CASC15                                                 | rs76257188  | 21688091 | T,G     | 0.8712 | 0.7018 | 0.913   | 0.769   | 1.41   | 0.2351  |
| CASC15                                                 | rs75629001  | 21689221 | C,T     | 0.8716 | 0.708  | 0.904   | 0.763   | 1.4038 | 0.2361  |
| CASC15                                                 | rs77518511  | 21690391 | A,G     | 0.9839 | 0.4553 | 28.328  | 23.996  | 1.3936 | 0.2378  |
| CASC15                                                 | rs71563994  | 21668435 | T,C     | 0.9731 | 0.7255 | -126.96 | 108.728 | 1.3635 | 0.2429  |
| CASC15                                                 | rs9466140   | 21673293 | A,G     | 0.9286 | 0.9271 | 154.988 | 134.676 | 1.3244 | 0.2498  |
| CASC15                                                 | rs4712625   | 21699342 | G,A     | 0.8761 | 0.9937 | 0.501   | 0.439   | 1.3042 | 0.2534  |



|        |             |          |     |        |        |         |         |        |        |
|--------|-------------|----------|-----|--------|--------|---------|---------|--------|--------|
| CASC15 | rs35922627  | 21667988 | A,T | 0.973  | 0.7238 | -118.61 | 104.164 | 1.2965 | 0.2549 |
| CASC15 | rs5874828   | 21692948 | R,D | 0.8716 | 0.725  | 0.854   | 0.755   | 1.2818 | 0.2576 |
| CASC15 | rs7739666   | 21718260 | T,C | 0.9818 | 0.939  | -619.52 | 548.173 | 1.2773 | 0.2584 |
| CASC15 | rs138380902 | 21731187 | R,D | 0.9079 | 0.9299 | 0.445   | 0.406   | 1.197  | 0.2739 |
| CASC15 | rs117061311 | 21683546 | G,A | 0.9853 | 0.4203 | 105.667 | 96.808  | 1.1914 | 0.275  |
| CASC15 | rs115395409 | 21696639 | C,T | 0.99   | 0.5674 | 7.819   | 7.343   | 1.1341 | 0.2869 |
| CASC15 | rs145825998 | 21695945 | T,G | 0.9899 | 0.5601 | 7.893   | 7.429   | 1.1287 | 0.288  |
| CASC15 | rs1555529   | 21691704 | A,G | 0.7822 | 0.9942 | -0.398  | 0.387   | 1.0531 | 0.3048 |
| CASC15 | rs9368333   | 21743631 | A,C | 0.9748 | 0.5254 | 83.563  | 81.588  | 1.049  | 0.3057 |
| CASC15 | rs113975012 | 21712110 | A,T | 0.9843 | 0.5172 | 9.096   | 9.107   | 0.9975 | 0.3179 |
| CASC15 | rs12191413  | 21740465 | A,T | 0.7737 | 0.8456 | 0.344   | 0.346   | 0.988  | 0.3202 |
| CASC15 | rs7754895   | 21696533 | T,C | 0.9459 | 0.5325 | 1.953   | 2.007   | 0.9466 | 0.3306 |
| CASC15 | rs111405274 | 21694954 | A,G | 0.9508 | 0.5151 | 2.325   | 2.391   | 0.9454 | 0.3309 |
| CASC15 | rs79337490  | 21695025 | T,C | 0.9508 | 0.5151 | 2.32    | 2.387   | 0.9445 | 0.3311 |
| CASC15 | rs7772692   | 21696544 | A,G | 0.9472 | 0.5318 | 1.961   | 2.022   | 0.9407 | 0.3321 |
| CASC15 | rs138387168 | 21716280 | C,T | 0.9765 | 0.7359 | 16.621  | 17.151  | 0.9392 | 0.3325 |
| CASC15 | rs72175369  | 21738076 | R,D | 0.9214 | 0.781  | 0.412   | 0.426   | 0.9354 | 0.3335 |
| CASC15 | rs113889001 | 21695381 | A,C | 0.9496 | 0.5091 | 2.241   | 2.338   | 0.9184 | 0.3379 |
| CASC15 | rs7775506   | 21729962 | C,T | 0.4216 | 0.9976 | -0.289  | 0.302   | 0.9141 | 0.339  |
| CASC15 | rs7744188   | 21694601 | T,C | 0.9149 | 0.6416 | 1.455   | 1.542   | 0.8911 | 0.3452 |
| CASC15 | rs7754702   | 21696403 | T,C | 0.9482 | 0.5267 | 1.904   | 2.034   | 0.8757 | 0.3494 |
| CASC15 | rs9358448   | 21731736 | G,A | 0.9305 | 0.9625 | 0.387   | 0.415   | 0.872  | 0.3504 |
| CASC15 | rs9348484   | 21731460 | C,G | 0.93   | 0.9619 | 0.387   | 0.415   | 0.8717 | 0.3505 |
| CASC15 | rs9295513   | 21599766 | G,A | 0.9746 | 0.8988 | 138.59  | 150.123 | 0.8523 | 0.3559 |
| CASC15 | rs12189901  | 21726940 | G,A | 0.9308 | 0.9638 | 0.384   | 0.416   | 0.8518 | 0.3561 |
| CASC15 | rs7760462   | 21730877 | G,C | 0.4165 | 0.9846 | -0.286  | 0.311   | 0.8477 | 0.3572 |
| CASC15 | rs547687648 | 21729656 | R,I | 0.7892 | 0.8727 | 0.337   | 0.367   | 0.8434 | 0.3584 |
| CASC15 | rs9368332   | 21731094 | G,A | 0.4156 | 0.9974 | -0.284  | 0.31    | 0.8394 | 0.3596 |
| CASC15 | rs9460671   | 21731289 | G,C | 0.41   | 0.9868 | -0.282  | 0.31    | 0.8247 | 0.3638 |
| CASC15 | rs7451817   | 21735497 | A,C | 0.9341 | 0.9124 | 0.377   | 0.416   | 0.8227 | 0.3644 |
| CASC15 | rs9358449   | 21732383 | G,A | 0.937  | 0.9915 | 0.371   | 0.413   | 0.8091 | 0.3684 |
| CASC15 | rs112039884 | 21729100 | C,T | 0.9274 | 0.9676 | 0.371   | 0.413   | 0.8087 | 0.3685 |
| CASC15 | rs75327712  | 21728829 | G,A | 0.9295 | 0.9778 | 0.371   | 0.413   | 0.8087 | 0.3685 |
| CASC15 | rs9358450   | 21740882 | A,G | 0.746  | 0.858  | 0.287   | 0.319   | 0.8083 | 0.3686 |
| CASC15 | rs10946466  | 21727456 | C,A | 0.9298 | 0.9928 | 0.37    | 0.413   | 0.8066 | 0.3691 |
| CASC15 | rs12206842  | 21734489 | A,T | 0.9372 | 1      | 0.37    | 0.413   | 0.8066 | 0.3691 |
| CASC15 | rs4712632   | 21732137 | G,A | 0.4138 | 0.9644 | -0.277  | 0.31    | 0.802  | 0.3705 |
| CASC15 | rs77991965  | 21694060 | G,A | 0.9358 | 0.6372 | 1.732   | 1.935   | 0.8015 | 0.3706 |
| CASC15 | rs4710981   | 21732702 | G,C | 0.4166 | 0.9635 | -0.275  | 0.309   | 0.7921 | 0.3735 |
| CASC15 | rs74785728  | 21611723 | G,A | 0.9819 | 0.9332 | 341.917 | 386.249 | 0.7836 | 0.376  |
| CASC15 | rs57792403  | 21738640 | R,D | 0.4364 | 0.9838 | -0.269  | 0.304   | 0.7821 | 0.3765 |
| CASC15 | rs530398575 | 21733586 | R,I | 0.8629 | 0.4934 | 0.478   | 0.54    | 0.7819 | 0.3766 |
| CASC15 | rs78278852  | 21688571 | G,A | 0.9753 | 0.5113 | 4.474   | 5.085   | 0.774  | 0.379  |
| CASC15 | rs9366408   | 21742607 | G,A | 0.9822 | 0.9856 | 212.892 | 243.26  | 0.7659 | 0.3815 |
| CASC15 | rs148767257 | 21687606 | C,T | 0.9752 | 0.5064 | 4.441   | 5.09    | 0.7613 | 0.3829 |

|        |             |          |     |        |        |         |         |        |        |
|--------|-------------|----------|-----|--------|--------|---------|---------|--------|--------|
| CASC15 | rs79684204  | 21687368 | A,C | 0.9748 | 0.5098 | 4.442   | 5.094   | 0.7602 | 0.3833 |
| CASC15 | rs9348483   | 21687390 | G,T | 0.7953 | 0.87   | -0.344  | 0.396   | 0.7545 | 0.385  |
| CASC15 | rs142460847 | 21687632 | A,G | 0.9751 | 0.5044 | 4.419   | 5.094   | 0.7525 | 0.3857 |
| CASC15 | rs115180462 | 21686653 | G,C | 0.9752 | 0.5032 | 4.404   | 5.098   | 0.7465 | 0.3876 |
| CASC15 | rs7747757   | 21686714 | C,T | 0.9752 | 0.5035 | 4.404   | 5.098   | 0.7465 | 0.3876 |
| CASC15 | rs7775517   | 21699901 | T,G | 0.9389 | 0.6039 | 1.285   | 1.497   | 0.7366 | 0.3907 |
| CASC15 | rs7746895   | 21686168 | C,A | 0.9752 | 0.5028 | 4.377   | 5.101   | 0.7364 | 0.3908 |
| CASC15 | rs7755254   | 21699892 | C,T | 0.9389 | 0.6037 | 1.286   | 1.499   | 0.7358 | 0.391  |
| CASC15 | rs79381952  | 21699489 | T,C | 0.9398 | 0.6026 | 1.301   | 1.521   | 0.7322 | 0.3922 |
| CASC15 | rs840982    | 21740321 | T,C | 0.4378 | 0.9967 | -0.259  | 0.303   | 0.7309 | 0.3926 |
| CASC15 | rs530522537 | 21694259 | R,D | 0.9305 | 0.6164 | 1.705   | 1.997   | 0.7291 | 0.3932 |
| CASC15 | rs7746424   | 21685920 | C,T | 0.9762 | 0.4981 | 4.383   | 5.138   | 0.7276 | 0.3937 |
| CASC15 | rs7746432   | 21685933 | C,T | 0.9755 | 0.5041 | 4.383   | 5.138   | 0.7276 | 0.3937 |
| CASC15 | rs79949484  | 21728966 | G,A | 0.9319 | 0.8819 | 0.39    | 0.457   | 0.7266 | 0.394  |
| CASC15 | rs840981    | 21740238 | G,A | 0.4381 | 1      | -0.258  | 0.302   | 0.7265 | 0.394  |
| CASC15 | rs7746292   | 21685907 | A,G | 0.9762 | 0.4817 | 4.372   | 5.16    | 0.718  | 0.3968 |
| CASC15 | rs60309622  | 21698465 | C,T | 0.9414 | 0.5673 | 1.412   | 1.674   | 0.7115 | 0.3989 |
| CASC15 | rs112103466 | 21699063 | T,C | 0.9395 | 0.5894 | 1.366   | 1.62    | 0.7108 | 0.3992 |
| CASC15 | rs112047759 | 21699028 | T,C | 0.9395 | 0.5892 | 1.368   | 1.622   | 0.7105 | 0.3993 |
| CASC15 | rs58699714  | 21698897 | C,T | 0.9395 | 0.5888 | 1.37    | 1.627   | 0.7091 | 0.3997 |
| CASC15 | rs558880181 | 21699974 | R,D | 0.9241 | 0.5575 | 1.242   | 1.479   | 0.7047 | 0.4012 |
| CASC15 | rs6929294   | 21698041 | T,G | 0.9394 | 0.5831 | 1.408   | 1.684   | 0.6993 | 0.403  |
| CASC15 | rs6929483   | 21698094 | T,C | 0.9394 | 0.583  | 1.403   | 1.68    | 0.6978 | 0.4035 |
| CASC15 | rs149555362 | 21726144 | T,C | 0.9879 | 0.8456 | 3.206   | 3.853   | 0.6924 | 0.4054 |
| CASC15 | rs111357910 | 21723888 | A,G | 0.988  | 0.8511 | 3.154   | 3.792   | 0.6916 | 0.4056 |
| CASC15 | rs144222210 | 21726206 | C,T | 0.987  | 0.7975 | 3.205   | 3.853   | 0.6917 | 0.4056 |
| CASC15 | rs112837708 | 21696451 | G,A | 0.9648 | 0.4436 | 2.716   | 3.292   | 0.6805 | 0.4094 |
| CASC15 | rs115731554 | 21723090 | C,T | 0.9877 | 0.8291 | 3.114   | 3.782   | 0.6781 | 0.4102 |
| CASC15 | rs78529444  | 21722481 | A,G | 0.9876 | 0.8222 | 3.114   | 3.782   | 0.6781 | 0.4102 |
| CASC15 | rs75062640  | 21722533 | A,G | 0.9823 | 0.8162 | 3.098   | 3.771   | 0.6748 | 0.4114 |
| CASC15 | rs1740830   | 21648615 | C,T | 0.867  | 0.7367 | 0.471   | 0.578   | 0.6648 | 0.4149 |
| CASC15 | rs6906888   | 21697966 | G,A | 0.9391 | 0.5729 | 1.464   | 1.796   | 0.6642 | 0.4151 |
| CASC15 | rs4710983   | 21734202 | C,T | 0.767  | 0.9462 | 0.247   | 0.304   | 0.658  | 0.4173 |
| CASC15 | rs6906248   | 21697889 | A,G | 0.9391 | 0.5714 | 1.47    | 1.815   | 0.6565 | 0.4178 |
| CASC15 | rs6929045   | 21697861 | T,C | 0.9391 | 0.5712 | 1.47    | 1.817   | 0.6542 | 0.4186 |
| CASC15 | rs76144443  | 21697748 | A,G | 0.9391 | 0.5709 | 1.472   | 1.822   | 0.6523 | 0.4193 |
| CASC15 | rs6928871   | 21697812 | T,C | 0.9391 | 0.571  | 1.469   | 1.819   | 0.6519 | 0.4195 |
| CASC15 | rs9466144   | 21676886 | G,T | 0.943  | 0.852  | 76.419  | 95.19   | 0.6445 | 0.4221 |
| CASC15 | rs75122426  | 21580566 | T,C | 0.985  | 0.6235 | 235.574 | 294.356 | 0.6405 | 0.4235 |
| CASC15 | rs9460669   | 21729251 | A,G | 0.4053 | 0.9459 | -0.254  | 0.319   | 0.6338 | 0.4259 |
| CASC15 | rs145960980 | 21729330 | D,R | 0.4093 | 0.9758 | -0.25   | 0.315   | 0.6331 | 0.4262 |
| CASC15 | rs114455294 | 21693186 | A,T | 0.9731 | 0.5546 | 1.847   | 2.324   | 0.6317 | 0.4267 |
| CASC15 | rs9466153   | 21700048 | C,T | 0.9445 | 0.5887 | 1.27    | 1.615   | 0.6186 | 0.4316 |
| CASC15 | rs1744878   | 21652230 | A,C | 0.8076 | 0.9338 | 0.275   | 0.356   | 0.5974 | 0.4396 |
| CASC15 | rs114613272 | 21721382 | C,T | 0.984  | 0.8169 | 38.983  | 50.538  | 0.595  | 0.4405 |

|        |             |          |     |        |        |         |         |        |        |
|--------|-------------|----------|-----|--------|--------|---------|---------|--------|--------|
| CASC15 | rs76857610  | 21685543 | G,T | 0.9888 | 0.4734 | 4.429   | 5.812   | 0.5806 | 0.4461 |
| CASC15 | rs35487983  | 21739331 | R,D | 0.6885 | 0.8315 | 0.259   | 0.341   | 0.5782 | 0.447  |
| CASC15 | rs9466160   | 21722771 | A,G | 0.9736 | 0.8106 | 14.205  | 18.72   | 0.5758 | 0.448  |
| CASC15 | rs144306476 | 21721932 | T,G | 0.989  | 0.6617 | 18.37   | 24.536  | 0.5605 | 0.454  |
| CASC15 | rs9460658   | 21684193 | C,T | 0.9792 | 0.347  | 2.056   | 2.792   | 0.5424 | 0.4615 |
| CASC15 | rs78345714  | 21734098 | T,C | 0.9849 | 0.6839 | -0.911  | 1.238   | 0.5414 | 0.4619 |
| CASC15 | rs61661762  | 21588463 | A,G | 0.9883 | 0.3149 | -1.188  | 1.657   | 0.5139 | 0.4734 |
| CASC15 | rs561391795 | 21725044 | R,D | 0.9346 | 0.4431 | -1.164  | 1.64    | 0.5039 | 0.4778 |
| CASC15 | rs7739131   | 21727148 | C,T | 0.7149 | 0.9794 | 0.24    | 0.34    | 0.4977 | 0.4805 |
| CASC15 | rs139581361 | 21722128 | G,A | 0.9879 | 0.8119 | 53.19   | 75.668  | 0.4941 | 0.4821 |
| CASC15 | rs1744881   | 21657548 | G,A | 0.8047 | 0.8556 | 0.243   | 0.35    | 0.4837 | 0.4868 |
| CASC15 | rs2180419   | 21728317 | A,G | 0.4028 | 0.9843 | -0.214  | 0.311   | 0.4722 | 0.492  |
| CASC15 | rs10636012  | 21727515 | I,R | 0.4062 | 0.9929 | -0.212  | 0.308   | 0.4703 | 0.4928 |
| CASC15 | rs1830667   | 21728089 | G,T | 0.4027 | 0.9868 | -0.211  | 0.31    | 0.4634 | 0.496  |
| CASC15 | rs111442391 | 21730723 | C,T | 0.9726 | 0.3086 | -0.958  | 1.412   | 0.4607 | 0.4973 |
| CASC15 | rs13220312  | 21671856 | A,G | 0.9734 | 0.7398 | 113.646 | 167.565 | 0.46   | 0.4976 |
| CASC15 | rs75179770  | 21568397 | C,T | 0.9582 | 0.4017 | 1.12    | 1.652   | 0.4593 | 0.498  |
| CASC15 | rs1407655   | 21727902 | G,A | 0.4028 | 0.9882 | -0.209  | 0.31    | 0.4542 | 0.5004 |
| CASC15 | rs7744078   | 21727822 | G,C | 0.4006 | 0.9944 | -0.208  | 0.309   | 0.4524 | 0.5012 |
| CASC15 | rs61197304  | 21570213 | G,A | 0.9581 | 0.4232 | 1.088   | 1.619   | 0.4514 | 0.5017 |
| CASC15 | rs7764209   | 21727755 | A,T | 0.4006 | 0.9953 | -0.207  | 0.309   | 0.4496 | 0.5025 |
| CASC15 | rs115733488 | 21695961 | T,C | 0.9892 | 0.5305 | 3.149   | 4.699   | 0.449  | 0.5028 |
| CASC15 | rs60459153  | 21570941 | G,A | 0.9572 | 0.4198 | 1.081   | 1.613   | 0.4489 | 0.5029 |
| CASC15 | rs1740825   | 21653689 | T,C | 0.7477 | 0.8767 | 0.224   | 0.336   | 0.4453 | 0.5046 |
| CASC15 | rs59880840  | 21556245 | G,A | 0.9598 | 0.3138 | 1.297   | 1.947   | 0.4438 | 0.5053 |
| CASC15 | rs7740084   | 21727531 | A,G | 0.4005 | 0.9983 | -0.206  | 0.309   | 0.4439 | 0.5053 |
| CASC15 | rs185847252 | 21676018 | G,A | 0.9496 | 0.8487 | -132.17 | 198.436 | 0.4436 | 0.5054 |
| CASC15 | rs61157774  | 21556217 | C,T | 0.9598 | 0.3134 | 1.297   | 1.947   | 0.4434 | 0.5055 |
| CASC15 | rs2759360   | 21653532 | A,G | 0.7648 | 0.8809 | 0.23    | 0.346   | 0.4419 | 0.5062 |
| CASC15 | rs145778004 | 21696926 | R,I | 0.9468 | 0.5319 | 1.472   | 2.243   | 0.4309 | 0.5115 |
| CASC15 | rs6912946   | 21659978 | A,T | 0.8051 | 0.821  | 0.226   | 0.346   | 0.4265 | 0.5137 |
| CASC15 | rs6900676   | 21697176 | A,G | 0.9471 | 0.5384 | 1.456   | 2.231   | 0.426  | 0.514  |
| CASC15 | rs6900485   | 21697055 | A,T | 0.9471 | 0.5382 | 1.454   | 2.234   | 0.4235 | 0.5152 |
| CASC15 | rs1740826   | 21651528 | G,A | 0.6892 | 0.9762 | 0.2     | 0.307   | 0.4225 | 0.5157 |
| CASC15 | rs1744877   | 21651554 | T,C | 0.6891 | 0.9768 | 0.199   | 0.307   | 0.4219 | 0.516  |
| CASC15 | rs139419250 | 21696871 | R,I | 0.9475 | 0.5307 | 1.453   | 2.241   | 0.4205 | 0.5167 |
| CASC15 | rs201453060 | 21648925 | R,I | 0.5221 | 0.4872 | -0.3    | 0.464   | 0.4176 | 0.5181 |
| CASC15 | rs79853707  | 21699451 | C,T | 0.986  | 0.5502 | 1.429   | 2.218   | 0.415  | 0.5195 |
| CASC15 | rs6939472   | 21661019 | G,C | 0.7866 | 0.7792 | 0.221   | 0.344   | 0.4141 | 0.5199 |
| CASC15 | rs1744876   | 21651003 | T,C | 0.8157 | 0.9901 | 0.228   | 0.355   | 0.412  | 0.521  |
| CASC15 | rs111374956 | 21699545 | G,C | 0.9871 | 0.5681 | 1.415   | 2.206   | 0.4115 | 0.5212 |
| CASC15 | rs7739607   | 21632345 | G,C | 0.6821 | 0.9067 | 0.199   | 0.312   | 0.4084 | 0.5228 |
| CASC15 | rs113183700 | 21702524 | A,G | 0.9869 | 0.5842 | 1.21    | 1.897   | 0.4066 | 0.5237 |
| CASC15 | rs534329540 | 21629251 | R,I | 0.4972 | 0.5784 | -0.241  | 0.381   | 0.4027 | 0.5257 |
| CASC15 | rs148775927 | 21677832 | C,G | 0.9884 | 0.5129 | 1.124   | 1.772   | 0.4026 | 0.5258 |

|        |             |          |     |        |        |         |         |        |        |
|--------|-------------|----------|-----|--------|--------|---------|---------|--------|--------|
| CASC15 | rs111928162 | 21706372 | T,C | 0.9868 | 0.6035 | 1.061   | 1.675   | 0.4012 | 0.5265 |
| CASC15 | rs149746556 | 21731479 | R,D | 0.9872 | 0.7098 | 0.903   | 1.425   | 0.4009 | 0.5266 |
| CASC15 | rs78584490  | 21732145 | C,T | 0.9872 | 0.7096 | 0.903   | 1.425   | 0.4008 | 0.5267 |
| CASC15 | rs141765572 | 21679089 | G,T | 0.9877 | 0.5484 | 1.153   | 1.823   | 0.3999 | 0.5272 |
| CASC15 | rs75935729  | 21733252 | C,A | 0.9872 | 0.709  | 0.902   | 1.431   | 0.3971 | 0.5286 |
| CASC15 | rs147596047 | 21733524 | R,D | 0.9872 | 0.709  | 0.902   | 1.431   | 0.3968 | 0.5287 |
| CASC15 | rs78378200  | 21647275 | T,C | 0.985  | 0.7319 | 0.818   | 1.3     | 0.3962 | 0.529  |
| CASC15 | rs74323084  | 21645152 | C,G | 0.9857 | 0.7691 | 0.816   | 1.297   | 0.3959 | 0.5292 |
| CASC15 | rs149385127 | 21642947 | G,A | 0.9849 | 0.723  | 0.816   | 1.297   | 0.3954 | 0.5295 |
| CASC15 | rs10946462  | 21651830 | C,T | 0.6894 | 0.9828 | 0.192   | 0.306   | 0.3951 | 0.5296 |
| CASC15 | rs77258728  | 21734254 | G,A | 0.9872 | 0.709  | 0.901   | 1.433   | 0.3948 | 0.5298 |
| CASC15 | rs113815998 | 21709365 | G,T | 0.9608 | 0.7324 | 0.887   | 1.414   | 0.3938 | 0.5303 |
| CASC15 | rs7753199   | 21717706 | G,A | 0.9819 | 0.9391 | 379.269 | 604.363 | 0.3938 | 0.5303 |
| CASC15 | rs7757232   | 21717818 | G,A | 0.9819 | 0.9404 | 379.269 | 604.363 | 0.3938 | 0.5303 |
| CASC15 | rs7757467   | 21718123 | C,T | 0.9813 | 0.9676 | 758.537 | 1208.73 | 0.3938 | 0.5303 |
| CASC15 | rs549313068 | 21638634 | R,D | 0.9854 | 0.7268 | 0.814   | 1.299   | 0.3924 | 0.5311 |
| CASC15 | rs182063949 | 21738643 | T,A | 0.9864 | 0.6453 | 0.915   | 1.466   | 0.3896 | 0.5325 |
| CASC15 | rs78937245  | 21738761 | C,T | 0.9864 | 0.6447 | 0.915   | 1.466   | 0.3893 | 0.5326 |
| CASC15 | rs4712623   | 21688978 | C,T | 0.638  | 0.848  | -0.231  | 0.374   | 0.3832 | 0.5359 |
| CASC15 | rs1740831   | 21647589 | G,A | 0.7131 | 0.9772 | 0.201   | 0.327   | 0.3777 | 0.5388 |
| CASC15 | rs116016141 | 21687920 | C,T | 0.988  | 0.5009 | 30.868  | 50.296  | 0.3767 | 0.5394 |
| CASC15 | rs141253251 | 21567552 | G,A | 0.9772 | 0.4147 | 1.014   | 1.661   | 0.3727 | 0.5415 |
| CASC15 | rs1740832   | 21646725 | A,G | 0.756  | 0.938  | 0.203   | 0.333   | 0.3711 | 0.5424 |
| CASC15 | rs114981716 | 21562453 | G,A | 0.977  | 0.3896 | 1.04    | 1.707   | 0.3707 | 0.5426 |
| CASC15 | rs7739585   | 21632295 | A,C | 0.6764 | 0.9279 | 0.185   | 0.304   | 0.3692 | 0.5435 |
| CASC15 | rs1744870   | 21638485 | A,C | 0.734  | 0.9006 | 0.206   | 0.341   | 0.3662 | 0.5451 |
| CASC15 | rs1744875   | 21648534 | C,A | 0.4998 | 0.4732 | -0.278  | 0.461   | 0.3636 | 0.5465 |
| CASC15 | rs1744867   | 21634171 | T,C | 0.7381 | 0.8918 | 0.207   | 0.343   | 0.3628 | 0.547  |
| CASC15 | rs2749682   | 21641716 | A,G | 0.6939 | 0.947  | 0.2     | 0.333   | 0.3611 | 0.5479 |
| CASC15 | rs9295514   | 21636585 | A,G | 0.7107 | 0.9234 | 0.203   | 0.339   | 0.3585 | 0.5494 |
| CASC15 | rs56175726  | 21566498 | G,A | 0.9534 | 0.3503 | 0.993   | 1.665   | 0.3556 | 0.551  |
| CASC15 | rs1740860   | 21678055 | T,C | 0.7991 | 0.7824 | 0.193   | 0.325   | 0.3529 | 0.5525 |
| CASC15 | rs145907846 | 21729085 | G,A | 0.9868 | 0.8724 | 65.112  | 109.884 | 0.3511 | 0.5535 |
| CASC15 | rs1744865   | 21631078 | A,C | 0.6628 | 0.9515 | 0.177   | 0.298   | 0.3501 | 0.5541 |
| CASC15 | rs1740827   | 21650969 | A,T | 0.7378 | 0.9342 | 0.2     | 0.339   | 0.3491 | 0.5546 |
| CASC15 | rs1744879   | 21652741 | A,G | 0.6892 | 0.9997 | 0.178   | 0.302   | 0.3452 | 0.5569 |
| CASC15 | rs11757166  | 21652990 | C,T | 0.6883 | 0.9879 | 0.178   | 0.303   | 0.3433 | 0.5579 |
| CASC15 | rs1744880   | 21653046 | A,G | 0.6868 | 0.9845 | 0.178   | 0.303   | 0.3425 | 0.5584 |
| CASC15 | rs6456439   | 21645743 | T,G | 0.7125 | 0.9939 | 0.189   | 0.324   | 0.3416 | 0.5589 |
| CASC15 | rs1740867   | 21663105 | C,T | 0.7594 | 0.7883 | 0.194   | 0.336   | 0.3338 | 0.5634 |
| CASC15 | rs13211544  | 21619214 | C,A | 0.8478 | 0.3133 | -0.446  | 0.775   | 0.3318 | 0.5646 |
| CASC15 | rs1744863   | 21629887 | A,G | 0.6612 | 0.9532 | 0.17    | 0.296   | 0.3291 | 0.5662 |
| CASC15 | rs1744884   | 21663449 | G,A | 0.7593 | 0.786  | 0.192   | 0.335   | 0.3284 | 0.5666 |
| CASC15 | rs1744862   | 21629881 | C,A | 0.6612 | 0.9531 | 0.17    | 0.296   | 0.3283 | 0.5667 |
| CASC15 | rs1744890   | 21678059 | A,G | 0.8017 | 0.7924 | 0.185   | 0.325   | 0.3254 | 0.5684 |

|        |             |          |     |        |        |         |         |        |        |
|--------|-------------|----------|-----|--------|--------|---------|---------|--------|--------|
| CASC15 | rs1740866   | 21664729 | T,G | 0.7801 | 0.807  | 0.193   | 0.339   | 0.3239 | 0.5693 |
| CASC15 | rs1744882   | 21657561 | T,G | 0.7003 | 0.8473 | 0.178   | 0.315   | 0.3209 | 0.5711 |
| CASC15 | rs59493338  | 21646242 | T,A | 0.701  | 0.8468 | 0.191   | 0.339   | 0.3169 | 0.5735 |
| CASC15 | rs34954830  | 21632488 | R,I | 0.9584 | 0.5469 | 10.823  | 19.33   | 0.3135 | 0.5756 |
| CASC15 | rs79002033  | 21706995 | C,T | 0.9739 | 0.6771 | 5.53    | 9.909   | 0.3115 | 0.5768 |
| CASC15 | rs2749688   | 21658487 | G,C | 0.6992 | 0.8356 | 0.176   | 0.315   | 0.3113 | 0.5769 |
| CASC15 | rs111355896 | 21649454 | I,R | 0.7486 | 0.9074 | 0.187   | 0.338   | 0.3057 | 0.5803 |
| CASC15 | rs941990    | 21658881 | A,G | 0.6778 | 0.8561 | 0.172   | 0.313   | 0.3016 | 0.5828 |
| CASC15 | rs540918539 | 21717464 | R,D | 0.9882 | 0.804  | 253.687 | 478.565 | 0.281  | 0.596  |
| CASC15 | rs1740838   | 21632759 | G,T | 0.3851 | 0.7571 | -0.177  | 0.334   | 0.2802 | 0.5966 |
| CASC15 | rs1740868   | 21660205 | G,T | 0.6798 | 0.8487 | 0.164   | 0.313   | 0.2753 | 0.5998 |
| CASC15 | rs571708107 | 21634038 | D,R | 0.6795 | 0.8686 | 0.168   | 0.321   | 0.2748 | 0.6001 |
| CASC15 | rs116878740 | 21665291 | A,G | 0.9855 | 0.5757 | 67.447  | 130.288 | 0.268  | 0.6047 |
| CASC15 | rs1740837   | 21633917 | C,T | 0.6783 | 0.9174 | 0.164   | 0.317   | 0.2672 | 0.6052 |
| CASC15 | rs1740833   | 21646435 | A,G | 0.6798 | 0.9621 | 0.158   | 0.306   | 0.2644 | 0.6071 |
| CASC15 | rs370328808 | 21641504 | D,R | 0.7285 | 0.8536 | 0.161   | 0.323   | 0.2474 | 0.6189 |
| CASC15 | rs529643978 | 21641557 | D,R | 0.7285 | 0.854  | 0.161   | 0.323   | 0.2475 | 0.6189 |
| CASC15 | rs561593549 | 21641496 | C,T | 0.7285 | 0.8534 | 0.161   | 0.323   | 0.2472 | 0.619  |
| CASC15 | rs113411153 | 21641562 | D,R | 0.7285 | 0.8541 | 0.161   | 0.323   | 0.247  | 0.6192 |
| CASC15 | rs562290828 | 21641555 | D,R | 0.7285 | 0.8538 | 0.16    | 0.323   | 0.2467 | 0.6194 |
| CASC15 | rs1740852   | 21608979 | T,C | 0.895  | 0.9932 | -0.268  | 0.544   | 0.2431 | 0.622  |
| CASC15 | rs66647983  | 21633079 | R,D | 0.5368 | 0.3749 | -0.229  | 0.467   | 0.2404 | 0.6239 |
| CASC15 | rs1620996   | 21602552 | C,T | 0.8959 | 0.8139 | -0.296  | 0.606   | 0.2382 | 0.6255 |
| CASC15 | rs574039752 | 21629819 | R,D | 0.3639 | 0.9279 | -0.139  | 0.289   | 0.2319 | 0.6301 |
| CASC15 | rs6456438   | 21632215 | G,A | 0.7029 | 0.9547 | 0.143   | 0.298   | 0.2305 | 0.6311 |
| CASC15 | rs36027263  | 21648358 | I,R | 0.7129 | 0.8819 | 0.163   | 0.341   | 0.2301 | 0.6314 |
| CASC15 | rs11438117  | 21660100 | R,I | 0.4211 | 0.4868 | -0.183  | 0.382   | 0.2299 | 0.6316 |
| CASC15 | rs35612989  | 21663201 | R,I | 0.4311 | 0.4511 | -0.198  | 0.414   | 0.2295 | 0.6319 |
| CASC15 | rs80349490  | 21615188 | T,C | 0.9491 | 0.4807 | 0.527   | 1.106   | 0.2268 | 0.6339 |
| CASC15 | rs1615194   | 21648442 | T,C | 0.7437 | 0.9296 | 0.158   | 0.335   | 0.2225 | 0.6372 |
| CASC15 | rs1740828   | 21649085 | A,G | 0.5436 | 0.4642 | 0.224   | 0.482   | 0.2171 | 0.6412 |
| CASC15 | rs1744864   | 21630684 | C,T | 0.7008 | 1      | 0.135   | 0.289   | 0.2172 | 0.6412 |
| CASC15 | rs140643662 | 21664544 | G,A | 0.9855 | 0.5752 | 54.646  | 119.159 | 0.2103 | 0.6465 |
| CASC15 | rs531584400 | 21574100 | R,D | 0.9506 | 0.471  | 0.532   | 1.171   | 0.2067 | 0.6494 |
| CASC15 | rs6456443   | 21716233 | G,A | 0.9818 | 0.9202 | 129.548 | 285.173 | 0.2064 | 0.6496 |
| CASC15 | rs59015153  | 21574306 | T,A | 0.9504 | 0.4712 | 0.53    | 1.168   | 0.2061 | 0.6499 |
| CASC15 | rs1740839   | 21629928 | G,A | 0.7114 | 0.9827 | 0.131   | 0.292   | 0.202  | 0.6531 |
| CASC15 | rs1617781   | 21608766 | A,G | 0.693  | 0.9819 | -0.149  | 0.333   | 0.1998 | 0.6549 |
| CASC15 | rs60908846  | 21646239 | I,R | 0.758  | 0.8675 | 0.146   | 0.327   | 0.1995 | 0.6552 |
| CASC15 | rs1744874   | 21640902 | T,C | 0.7492 | 0.9047 | 0.152   | 0.34    | 0.1992 | 0.6554 |
| CASC15 | rs71563995  | 21676342 | A,G | 0.9697 | 0.7188 | 102.084 | 229.562 | 0.1978 | 0.6565 |
| CASC15 | rs1744871   | 21638566 | C,T | 0.7505 | 0.8974 | 0.152   | 0.342   | 0.1974 | 0.6568 |
| CASC15 | rs1744872   | 21638599 | C,T | 0.7505 | 0.8975 | 0.152   | 0.342   | 0.1972 | 0.657  |
| CASC15 | rs1744873   | 21638871 | C,T | 0.7506 | 0.8981 | 0.152   | 0.342   | 0.1969 | 0.6572 |
| CASC15 | rs11361021  | 21608909 | D,R | 0.6928 | 0.9683 | -0.148  | 0.334   | 0.1962 | 0.6578 |

|        |             |          |     |        |        |         |         |        |        |
|--------|-------------|----------|-----|--------|--------|---------|---------|--------|--------|
| CASC15 | rs9460655   | 21641564 | C,T | 0.6926 | 0.8571 | 0.146   | 0.33    | 0.1957 | 0.6582 |
| CASC15 | rs149699118 | 21633666 | D,R | 0.7515 | 0.8935 | 0.151   | 0.344   | 0.1937 | 0.6599 |
| CASC15 | rs75051132  | 21589799 | T,A | 0.98   | 0.6365 | 0.501   | 1.142   | 0.1923 | 0.661  |
| CASC15 | rs1740834   | 21645207 | C,T | 0.7742 | 0.9378 | 0.147   | 0.335   | 0.1917 | 0.6615 |
| CASC15 | rs1622043   | 21609285 | A,G | 0.6925 | 0.9814 | -0.145  | 0.333   | 0.1909 | 0.6621 |
| CASC15 | rs117396734 | 21615374 | A,T | 0.9894 | 0.5869 | 14.492  | 33.182  | 0.1907 | 0.6623 |
| CASC15 | rs11330136  | 21629471 | D,R | 0.7    | 0.9778 | 0.126   | 0.293   | 0.1846 | 0.6675 |
| CASC15 | rs1744861   | 21627986 | A,T | 0.3793 | 0.9676 | -0.122  | 0.286   | 0.1834 | 0.6685 |
| CASC15 | rs7756206   | 21635314 | T,G | 0.7423 | 0.8724 | 0.149   | 0.348   | 0.1826 | 0.6691 |
| CASC15 | rs201389513 | 21635326 | D,R | 0.7672 | 0.8696 | 0.147   | 0.344   | 0.1824 | 0.6693 |
| CASC15 | rs2749683   | 21635327 | T,G | 0.767  | 0.8784 | 0.149   | 0.35    | 0.1801 | 0.6713 |
| CASC15 | rs1740835   | 21637725 | G,A | 0.7724 | 0.8961 | 0.144   | 0.345   | 0.175  | 0.6757 |
| CASC15 | rs5874825   | 21634749 | I,R | 0.7699 | 0.8924 | 0.142   | 0.346   | 0.1698 | 0.6803 |
| CASC15 | rs1740836   | 21634644 | G,A | 0.7705 | 0.8935 | 0.142   | 0.345   | 0.1691 | 0.6809 |
| CASC15 | rs116443937 | 21600982 | A,T | 0.9889 | 0.6106 | 14.297  | 34.789  | 0.1689 | 0.6811 |
| CASC15 | rs78471563  | 21679073 | T,A | 0.9895 | 0.9404 | -260.77 | 638.279 | 0.1669 | 0.6829 |
| CASC15 | rs118074543 | 21601297 | C,G | 0.9891 | 0.6166 | 14.068  | 34.526  | 0.166  | 0.6837 |
| CASC15 | rs7738599   | 21631790 | A,G | 0.9365 | 0.4203 | -0.504  | 1.24    | 0.1654 | 0.6843 |
| CASC15 | rs2251647   | 21677746 | C,A | 0.9512 | 0.9786 | -0.239  | 0.589   | 0.1646 | 0.685  |
| CASC15 | rs113534734 | 21596349 | R,D | 0.9404 | 0.7354 | 0.394   | 0.973   | 0.1639 | 0.6856 |
| CASC15 | rs115252874 | 21601345 | A,C | 0.9891 | 0.6163 | 13.833  | 34.518  | 0.1606 | 0.6886 |
| CASC15 | rs114266456 | 21633347 | G,A | 0.9661 | 0.7099 | 0.399   | 0.996   | 0.1602 | 0.689  |
| CASC15 | rs78502915  | 21591248 | G,T | 0.9567 | 0.6759 | 0.406   | 1.017   | 0.1598 | 0.6894 |
| CASC15 | rs77708052  | 21605375 | C,T | 0.98   | 0.7948 | 0.396   | 0.991   | 0.1596 | 0.6895 |
| CASC15 | rs111482236 | 21588455 | T,C | 0.9537 | 0.6111 | 0.413   | 1.034   | 0.1593 | 0.6898 |
| CASC15 | rs570404489 | 21689796 | R,D | 0.7798 | 0.3015 | -0.38   | 0.955   | 0.1586 | 0.6905 |
| CASC15 | rs74329629  | 21583401 | G,A | 0.9656 | 0.5138 | 0.433   | 1.1     | 0.1547 | 0.6941 |
| CASC15 | rs79753782  | 21594201 | C,A | 0.9506 | 0.6778 | 0.388   | 0.992   | 0.1531 | 0.6956 |
| CASC15 | rs557872691 | 21603474 | R,D | 0.8825 | 0.5572 | 0.356   | 0.913   | 0.152  | 0.6967 |
| CASC15 | rs10643502  | 21641556 | T,C | 0.688  | 0.853  | 0.128   | 0.331   | 0.1492 | 0.6993 |
| CASC15 | rs150997476 | 21663402 | A,T | 0.9893 | 0.6383 | -0.555  | 1.46    | 0.1443 | 0.7041 |
| CASC15 | rs114750919 | 21725361 | C,G | 0.9867 | 0.8444 | -204.94 | 542.433 | 0.1427 | 0.7056 |
| CASC15 | rs9466128   | 21606679 | G,T | 0.3766 | 0.995  | 0.119   | 0.319   | 0.1398 | 0.7085 |
| CASC15 | rs4710982   | 21733835 | G,C | 0.8653 | 0.9343 | 0.237   | 0.642   | 0.1364 | 0.7119 |
| CASC15 | rs9466125   | 21601156 | A,G | 0.9295 | 0.9574 | 0.322   | 0.874   | 0.1355 | 0.7128 |
| CASC15 | rs78825652  | 21609539 | I,R | 0.6732 | 0.9671 | -0.122  | 0.332   | 0.135  | 0.7133 |
| CASC15 | rs112101248 | 21683625 | T,C | 0.9893 | 0.5442 | 20.808  | 56.793  | 0.1342 | 0.7141 |
| CASC15 | rs9460670   | 21731138 | C,A | 0.877  | 0.9736 | 0.235   | 0.641   | 0.134  | 0.7143 |
| CASC15 | rs7759991   | 21609547 | C,T | 0.6977 | 0.9669 | -0.121  | 0.333   | 0.1326 | 0.7158 |
| CASC15 | rs116258702 | 21618081 | C,T | 0.9891 | 0.5647 | 12.624  | 34.763  | 0.1319 | 0.7165 |
| CASC15 | rs1744848   | 21609563 | C,T | 0.6977 | 0.9669 | -0.12   | 0.332   | 0.1312 | 0.7172 |
| CASC15 | rs12528487  | 21735354 | A,G | 0.8629 | 0.9338 | 0.233   | 0.646   | 0.1302 | 0.7182 |
| CASC15 | rs12525631  | 21730840 | C,T | 0.8794 | 0.9968 | 0.23    | 0.638   | 0.1296 | 0.7188 |
| CASC15 | rs16885189  | 21729682 | G,A | 0.8667 | 0.9973 | 0.23    | 0.638   | 0.1296 | 0.7188 |
| CASC15 | rs4712633   | 21738249 | A,G | 0.8598 | 1      | 0.23    | 0.638   | 0.1296 | 0.7188 |

|        |             |          |     |        |        |         |        |        |        |
|--------|-------------|----------|-----|--------|--------|---------|--------|--------|--------|
| CASC15 | rs115900264 | 21738499 | A,G | 0.8705 | 0.965  | 0.231   | 0.643  | 0.1285 | 0.72   |
| CASC15 | rs68015368  | 21645499 | I,R | 0.8315 | 0.7435 | 0.147   | 0.41   | 0.1285 | 0.72   |
| CASC15 | rs117537289 | 21661595 | C,T | 0.9854 | 0.5671 | 29.531  | 83.009 | 0.1266 | 0.722  |
| CASC15 | rs76428292  | 21629756 | C,A | 0.974  | 0.7112 | 0.319   | 0.913  | 0.1218 | 0.7271 |
| CASC15 | rs6924745   | 21693837 | C,T | 0.8421 | 0.8514 | 0.179   | 0.513  | 0.1215 | 0.7274 |
| CASC15 | rs78030412  | 21631511 | T,C | 0.9731 | 0.7032 | 0.317   | 0.91   | 0.121  | 0.7279 |
| CASC15 | rs147960757 | 21606492 | G,T | 0.9772 | 0.8203 | 0.308   | 0.896  | 0.1182 | 0.731  |
| CASC15 | rs146269383 | 21601263 | G,A | 0.9772 | 0.8168 | 0.307   | 0.896  | 0.1176 | 0.7316 |
| CASC15 | rs1744860   | 21627046 | A,G | 0.6998 | 0.9875 | 0.1     | 0.293  | 0.1176 | 0.7317 |
| CASC15 | rs78523587  | 21614133 | G,A | 0.9764 | 0.7872 | 0.308   | 0.9    | 0.1169 | 0.7324 |
| CASC15 | rs16885105  | 21598981 | C,T | 0.9309 | 0.9869 | 0.298   | 0.874  | 0.1165 | 0.7329 |
| CASC15 | rs11281983  | 21600430 | R,I | 0.9309 | 0.9934 | 0.297   | 0.87   | 0.1163 | 0.7331 |
| CASC15 | rs9466124   | 21599700 | A,G | 0.9309 | 0.9964 | 0.297   | 0.87   | 0.1163 | 0.7331 |
| CASC15 | rs6921422   | 21600523 | C,A | 0.9308 | 0.9908 | 0.296   | 0.871  | 0.116  | 0.7335 |
| CASC15 | rs77625474  | 21604127 | G,T | 0.9308 | 0.9762 | 0.296   | 0.872  | 0.1155 | 0.7339 |
| CASC15 | rs1740841   | 21627053 | G,T | 0.6852 | 0.9798 | 0.099   | 0.293  | 0.1148 | 0.7348 |
| CASC15 | rs58919806  | 21570038 | G,A | 0.8921 | 0.397  | 0.256   | 0.768  | 0.1108 | 0.7393 |
| CASC15 | rs11965374  | 21629739 | T,G | 0.9653 | 0.7623 | 0.298   | 0.899  | 0.1099 | 0.7402 |
| CASC15 | rs56004640  | 21716262 | A,G | 0.8113 | 0.9096 | -0.149  | 0.45   | 0.1098 | 0.7403 |
| CASC15 | rs1740840   | 21627378 | G,A | 0.7156 | 0.9808 | 0.098   | 0.295  | 0.1097 | 0.7405 |
| CASC15 | rs75159243  | 21656071 | A,T | 0.9838 | 0.4842 | -9.303  | 28.083 | 0.1097 | 0.7405 |
| CASC15 | rs9350367   | 21555608 | C,T | 0.6563 | 0.3839 | 0.164   | 0.496  | 0.109  | 0.7413 |
| CASC15 | rs1744859   | 21626395 | T,C | 0.685  | 0.9803 | 0.097   | 0.293  | 0.1085 | 0.7418 |
| CASC15 | rs1744857   | 21626067 | T,C | 0.6993 | 0.9886 | 0.095   | 0.292  | 0.106  | 0.7448 |
| CASC15 | rs1744858   | 21626190 | T,C | 0.6849 | 0.9807 | 0.095   | 0.293  | 0.1052 | 0.7457 |
| CASC15 | rs78225455  | 21566785 | T,A | 0.9087 | 0.4686 | 0.242   | 0.75   | 0.1038 | 0.7473 |
| CASC15 | rs78686872  | 21566786 | T,C | 0.9087 | 0.4686 | 0.242   | 0.75   | 0.1038 | 0.7473 |
| CASC15 | rs147795739 | 21606396 | C,G | 0.9894 | 0.6082 | 10.856  | 34.007 | 0.1019 | 0.7496 |
| CASC15 | rs113932195 | 21562740 | T,C | 0.9088 | 0.469  | 0.238   | 0.747  | 0.1015 | 0.7501 |
| CASC15 | rs2144867   | 21689100 | C,T | 0.9874 | 0.3281 | -0.685  | 2.162  | 0.1004 | 0.7513 |
| CASC15 | rs9466158   | 21717309 | T,C | 0.7892 | 0.921  | -0.141  | 0.448  | 0.0991 | 0.7529 |
| CASC15 | rs1744887   | 21674378 | G,T | 0.9679 | 0.3275 | 0.746   | 2.378  | 0.0983 | 0.7538 |
| CASC15 | rs111479343 | 21561070 | G,T | 0.9092 | 0.4694 | 0.234   | 0.746  | 0.0982 | 0.7539 |
| CASC15 | rs9466143   | 21676688 | A,T | 0.943  | 0.8542 | 28.825  | 93.991 | 0.0941 | 0.7591 |
| CASC15 | rs6456441   | 21658313 | A,T | 0.9842 | 0.4898 | -12.952 | 42.393 | 0.0933 | 0.76   |
| CASC15 | rs4712620   | 21554898 | A,C | 0.6509 | 0.3847 | 0.143   | 0.477  | 0.0898 | 0.7644 |
| CASC15 | rs36093392  | 21601725 | D,R | 0.7127 | 0.8142 | -0.108  | 0.364  | 0.0889 | 0.7656 |
| CASC15 | rs73737557  | 21570448 | T,C | 0.9333 | 0.4619 | 0.27    | 0.907  | 0.0887 | 0.7659 |
| CASC15 | rs201995762 | 21706002 | R,I | 0.9873 | 0.4393 | 6.773   | 22.819 | 0.0881 | 0.7666 |
| CASC15 | rs143796183 | 21587351 | G,A | 0.9851 | 0.3168 | 1.654   | 5.574  | 0.088  | 0.7667 |
| CASC15 | rs112117324 | 21606452 | C,T | 0.9756 | 0.8592 | -7.364  | 24.889 | 0.0875 | 0.7673 |
| CASC15 | rs117538721 | 21647180 | T,C | 0.986  | 0.5245 | 3.926   | 13.277 | 0.0874 | 0.7675 |
| CASC15 | rs115061151 | 21659040 | A,C | 0.9843 | 0.4916 | -13.51  | 46.777 | 0.0834 | 0.7727 |
| CASC15 | rs150766348 | 21706424 | R,D | 0.6681 | 0.8073 | -0.13   | 0.451  | 0.0827 | 0.7736 |
| CASC15 | rs7753451   | 21607833 | T,C | 0.9894 | 0.606  | 9.838   | 34.324 | 0.0822 | 0.7744 |

|        |             |          |     |        |        |         |         |        |        |
|--------|-------------|----------|-----|--------|--------|---------|---------|--------|--------|
| CASC15 | rs11968460  | 21718604 | G,A | 0.8056 | 0.9024 | -0.127  | 0.444   | 0.0819 | 0.7747 |
| CASC15 | rs11284636  | 21591706 | R,D | 0.9858 | 0.4225 | 6.919   | 24.214  | 0.0816 | 0.7751 |
| CASC15 | rs9466155   | 21707222 | G,A | 0.6726 | 0.8766 | -0.122  | 0.43    | 0.0805 | 0.7766 |
| CASC15 | rs57442902  | 21704602 | C,T | 0.6719 | 0.8494 | -0.123  | 0.439   | 0.0785 | 0.7794 |
| CASC15 | rs34810044  | 21718703 | R,D | 0.7721 | 0.9072 | -0.124  | 0.444   | 0.0781 | 0.7799 |
| CASC15 | rs7754999   | 21705723 | C,T | 0.6691 | 0.8543 | -0.12   | 0.434   | 0.0771 | 0.7813 |
| CASC15 | rs62403971  | 21702621 | T,C | 0.6704 | 0.8339 | -0.123  | 0.445   | 0.0769 | 0.7815 |
| CASC15 | rs11380611  | 21703686 | R,I | 0.6704 | 0.84   | -0.122  | 0.442   | 0.0765 | 0.7821 |
| CASC15 | rs6933751   | 21704108 | T,C | 0.672  | 0.8471 | -0.122  | 0.441   | 0.0763 | 0.7824 |
| CASC15 | rs55686449  | 21702505 | T,C | 0.6687 | 0.8289 | -0.123  | 0.445   | 0.0761 | 0.7826 |
| CASC15 | rs13362741  | 21700158 | A,C | 0.6707 | 0.8039 | -0.125  | 0.454   | 0.0758 | 0.7831 |
| CASC15 | rs62403969  | 21702409 | A,C | 0.6716 | 0.8327 | -0.123  | 0.446   | 0.0758 | 0.7831 |
| CASC15 | rs35829440  | 21655243 | R,I | 0.602  | 0.3134 | -0.143  | 0.52    | 0.0755 | 0.7836 |
| CASC15 | rs4712627   | 21701892 | C,T | 0.6719 | 0.828  | -0.123  | 0.447   | 0.0754 | 0.7836 |
| CASC15 | rs4712630   | 21702161 | T,C | 0.6716 | 0.8305 | -0.123  | 0.447   | 0.0754 | 0.7836 |
| CASC15 | rs4712628   | 21702070 | C,G | 0.6704 | 0.828  | -0.123  | 0.447   | 0.0753 | 0.7837 |
| CASC15 | rs4712629   | 21702103 | A,G | 0.6716 | 0.83   | -0.123  | 0.447   | 0.0754 | 0.7837 |
| CASC15 | rs561618338 | 21639342 | R,I | 0.9855 | 0.4795 | 4.868   | 17.73   | 0.0754 | 0.7837 |
| CASC15 | rs2328624   | 21703736 | G,C | 0.672  | 0.8448 | -0.121  | 0.442   | 0.0753 | 0.7838 |
| CASC15 | rs73376030  | 21700390 | T,G | 0.6688 | 0.8019 | -0.124  | 0.452   | 0.075  | 0.7842 |
| CASC15 | rs6927945   | 21703341 | T,C | 0.672  | 0.841  | -0.12   | 0.443   | 0.0738 | 0.7859 |
| CASC15 | rs11751574  | 21702901 | G,A | 0.6716 | 0.8382 | -0.12   | 0.444   | 0.0734 | 0.7865 |
| CASC15 | rs2328626   | 21703885 | C,T | 0.6717 | 0.8448 | -0.119  | 0.441   | 0.0731 | 0.7869 |
| CASC15 | rs11753001  | 21726506 | T,C | 0.9147 | 0.5112 | 0.211   | 0.781   | 0.0729 | 0.7872 |
| CASC15 | rs2328625   | 21703880 | T,C | 0.6717 | 0.8446 | -0.119  | 0.441   | 0.0729 | 0.7872 |
| CASC15 | rs150435139 | 21707497 | A,G | 0.9874 | 0.4469 | 6.057   | 22.451  | 0.0728 | 0.7873 |
| CASC15 | rs36024930  | 21605537 | R,D | 0.7795 | 0.8154 | -0.103  | 0.381   | 0.0725 | 0.7877 |
| CASC15 | rs7762010   | 21701594 | G,A | 0.6719 | 0.8177 | -0.122  | 0.452   | 0.0723 | 0.788  |
| CASC15 | rs7761844   | 21701456 | G,A | 0.6722 | 0.8149 | -0.122  | 0.453   | 0.0722 | 0.7881 |
| CASC15 | rs7761595   | 21701550 | A,G | 0.6721 | 0.8165 | -0.121  | 0.452   | 0.0721 | 0.7883 |
| CASC15 | rs59730691  | 21701056 | C,T | 0.6717 | 0.8117 | -0.122  | 0.454   | 0.0718 | 0.7887 |
| CASC15 | rs62406887  | 21701319 | C,T | 0.6717 | 0.8135 | -0.121  | 0.453   | 0.0719 | 0.7887 |
| CASC15 | rs12528435  | 21562732 | G,A | 0.8866 | 0.355  | -0.238  | 0.89    | 0.0718 | 0.7888 |
| CASC15 | rs7761575   | 21701475 | C,T | 0.672  | 0.8148 | -0.121  | 0.453   | 0.0715 | 0.7891 |
| CASC15 | rs2876599   | 21714103 | C,G | 0.9889 | 0.7808 | 82.811  | 310.314 | 0.0712 | 0.7896 |
| CASC15 | rs2328627   | 21714362 | G,A | 0.9889 | 0.782  | 127.022 | 478.565 | 0.0704 | 0.7907 |
| CASC15 | rs6904795   | 21703099 | A,G | 0.6649 | 0.8486 | -0.117  | 0.441   | 0.0704 | 0.7908 |
| CASC15 | rs112153247 | 21701183 | C,T | 0.6716 | 0.8121 | -0.12   | 0.454   | 0.0701 | 0.7912 |
| CASC15 | rs140423760 | 21646093 | C,A | 0.9884 | 0.552  | 4.21    | 15.987  | 0.0693 | 0.7923 |
| CASC15 | rs4712626   | 21701841 | G,A | 0.6545 | 0.8328 | -0.117  | 0.444   | 0.0691 | 0.7927 |
| CASC15 | rs62406886  | 21701119 | T,C | 0.6631 | 0.8167 | -0.118  | 0.451   | 0.068  | 0.7942 |
| CASC15 | rs78474141  | 21604475 | G,T | 0.9839 | 0.9516 | -88.653 | 340.707 | 0.0677 | 0.7947 |
| CASC15 | rs73376077  | 21720504 | C,T | 0.7969 | 0.9025 | -0.111  | 0.438   | 0.0641 | 0.8001 |
| CASC15 | rs9466159   | 21721313 | A,G | 0.8227 | 0.9323 | -0.11   | 0.438   | 0.063  | 0.8018 |
| CASC15 | rs375807437 | 21686609 | R,D | 0.5634 | 0.7421 | 0.099   | 0.396   | 0.0627 | 0.8023 |



|        |             |          |     |        |        |         |         |        |        |
|--------|-------------|----------|-----|--------|--------|---------|---------|--------|--------|
| CASC15 | rs1744855   | 21623715 | G,A | 0.3803 | 0.9708 | -0.071  | 0.288   | 0.0609 | 0.8051 |
| CASC15 | rs58572340  | 21555505 | T,A | 0.8729 | 0.5846 | 0.139   | 0.564   | 0.0605 | 0.8057 |
| CASC15 | rs183503583 | 21638847 | G,A | 0.9885 | 0.5492 | 5.216   | 21.478  | 0.059  | 0.8081 |
| CASC15 | rs12183824  | 21726382 | G,A | 0.8184 | 0.3562 | -0.255  | 1.055   | 0.0586 | 0.8087 |
| CASC15 | rs141898580 | 21709985 | C,T | 0.9816 | 0.8379 | -12.84  | 53.288  | 0.0581 | 0.8096 |
| CASC15 | rs150071402 | 21610552 | G,A | 0.9896 | 0.5952 | 8.692   | 36.113  | 0.0579 | 0.8098 |
| CASC15 | rs56050802  | 21555539 | C,T | 0.8664 | 0.6128 | 0.121   | 0.509   | 0.0565 | 0.812  |
| CASC15 | rs116187696 | 21639646 | G,A | 0.9868 | 0.5351 | 4.487   | 19.03   | 0.0556 | 0.8136 |
| CASC15 | rs60336041  | 21714991 | A,C | 0.9818 | 0.9007 | -41.504 | 176.44  | 0.0553 | 0.814  |
| CASC15 | rs7740486   | 21714797 | A,G | 0.9818 | 0.8978 | -41.504 | 176.44  | 0.0553 | 0.814  |
| CASC15 | rs76475505  | 21611890 | T,G | 0.9837 | 0.9609 | -37.787 | 160.733 | 0.0553 | 0.8141 |
| CASC15 | rs9466129   | 21610137 | C,G | 0.9838 | 0.9565 | -37.787 | 160.733 | 0.0553 | 0.8141 |
| CASC15 | rs138691949 | 21653247 | A,T | 0.9812 | 0.5466 | 3.894   | 16.584  | 0.0551 | 0.8143 |
| CASC15 | rs200822534 | 21701029 | R,D | 0.6386 | 0.6957 | -0.116  | 0.497   | 0.0548 | 0.8149 |
| CASC15 | rs111684701 | 21608562 | C,T | 0.9809 | 0.9509 | -93.327 | 402.909 | 0.0537 | 0.8168 |
| CASC15 | rs112892524 | 21608321 | C,T | 0.981  | 0.9464 | -93.327 | 402.909 | 0.0537 | 0.8168 |
| CASC15 | rs571632729 | 21726382 | R,I | 0.896  | 0.3926 | -0.264  | 1.151   | 0.0527 | 0.8184 |
| CASC15 | rs141900910 | 21647244 | C,T | 0.9864 | 0.543  | 3.071   | 13.627  | 0.0508 | 0.8217 |
| CASC15 | rs148261621 | 21712086 | R,I | 0.7162 | 0.7178 | -0.102  | 0.479   | 0.0453 | 0.8314 |
| CASC15 | rs201513044 | 21589010 | R,D | 0.9897 | 0.4337 | 1.698   | 8.079   | 0.0442 | 0.8336 |
| CASC15 | rs116598598 | 21654884 | A,T | 0.983  | 0.5411 | 5.357   | 25.851  | 0.0429 | 0.8358 |
| CASC15 | rs78714768  | 21631590 | C,T | 0.9845 | 0.8158 | -29.778 | 143.94  | 0.0428 | 0.8361 |
| CASC15 | rs73737565  | 21664442 | T,G | 0.9768 | 0.5564 | -14.376 | 69.786  | 0.0424 | 0.8368 |
| CASC15 | rs397888201 | 21681363 | R,D | 0.4982 | 0.7168 | -0.069  | 0.336   | 0.0417 | 0.8382 |
| CASC15 | rs60368679  | 21746134 | C,T | 0.9868 | 0.3206 | -0.4    | 1.978   | 0.0408 | 0.8399 |
| CASC15 | rs9368325   | 21577508 | C,T | 0.8604 | 0.347  | -0.146  | 0.725   | 0.0404 | 0.8407 |
| CASC15 | rs1322883   | 21720796 | A,G | 0.5867 | 0.9164 | -0.079  | 0.398   | 0.0392 | 0.8431 |
| CASC15 | rs75994264  | 21745903 | C,T | 0.9868 | 0.3369 | -0.381  | 1.932   | 0.0389 | 0.8436 |
| CASC15 | rs73392011  | 21569756 | C,T | 0.9671 | 0.445  | 0.294   | 1.503   | 0.0383 | 0.8448 |
| CASC15 | rs113196987 | 21575419 | A,G | 0.9232 | 0.5162 | 0.129   | 0.665   | 0.0379 | 0.8457 |
| CASC15 | rs77273443  | 21620705 | G,A | 0.984  | 0.938  | -21.04  | 108.774 | 0.0374 | 0.8466 |
| CASC15 | rs141007801 | 21722788 | R,I | 0.8394 | 0.8482 | -0.09   | 0.468   | 0.0374 | 0.8468 |
| CASC15 | rs9466169   | 21746181 | A,G | 0.8659 | 0.4166 | -0.154  | 0.801   | 0.0371 | 0.8472 |
| CASC15 | rs11327351  | 21623643 | D,R | 0.6711 | 0.9267 | 0.059   | 0.307   | 0.0365 | 0.8485 |
| CASC15 | rs1744856   | 21625895 | G,A | 0.6341 | 0.4717 | -0.085  | 0.447   | 0.0357 | 0.8501 |
| CASC15 | rs146150526 | 21575243 | T,C | 0.9263 | 0.5346 | 0.125   | 0.667   | 0.0348 | 0.852  |
| CASC15 | rs111526226 | 21567385 | T,C | 0.968  | 0.4673 | 0.269   | 1.475   | 0.0333 | 0.8552 |
| CASC15 | rs116342166 | 21630548 | T,C | 0.9891 | 0.5558 | 6.935   | 38.249  | 0.0329 | 0.8561 |
| CASC15 | rs111928481 | 21648542 | T,A | 0.9738 | 0.8848 | -0.22   | 1.216   | 0.0328 | 0.8562 |
| CASC15 | rs113064891 | 21606092 | R,I | 0.9811 | 0.9369 | -35.186 | 194.848 | 0.0326 | 0.8567 |
| CASC15 | rs112617138 | 21576898 | A,G | 0.938  | 0.5193 | 0.118   | 0.664   | 0.0318 | 0.8585 |
| CASC15 | rs112653724 | 21576915 | G,A | 0.9388 | 0.5234 | 0.118   | 0.668   | 0.0314 | 0.8594 |
| CASC15 | rs77354845  | 21621783 | A,G | 0.9841 | 0.9371 | -17.664 | 99.905  | 0.0313 | 0.8597 |
| CASC15 | rs4616978   | 21606129 | G,A | 0.8111 | 0.9353 | -0.064  | 0.366   | 0.0307 | 0.8608 |
| CASC15 | rs112243204 | 21582142 | T,C | 0.9498 | 0.5703 | 0.112   | 0.651   | 0.0298 | 0.863  |

|        |             |          |     |        |        |         |         |        |        |
|--------|-------------|----------|-----|--------|--------|---------|---------|--------|--------|
| CASC15 | rs79847215  | 21560355 | C,A | 0.9848 | 0.3334 | 0.367   | 2.134   | 0.0296 | 0.8634 |
| CASC15 | rs111503674 | 21585461 | T,C | 0.941  | 0.5927 | 0.11    | 0.641   | 0.0295 | 0.8635 |
| CASC15 | rs75228175  | 21579117 | C,T | 0.9479 | 0.5358 | 0.114   | 0.661   | 0.0296 | 0.8635 |
| CASC15 | rs77401992  | 21579608 | A,G | 0.9474 | 0.5364 | 0.113   | 0.656   | 0.0296 | 0.8635 |
| CASC15 | rs76401928  | 21586715 | G,A | 0.9419 | 0.6097 | 0.109   | 0.637   | 0.0292 | 0.8642 |
| CASC15 | rs79521243  | 21581049 | T,C | 0.9405 | 0.5684 | 0.11    | 0.648   | 0.029  | 0.8647 |
| CASC15 | rs57690989  | 21652353 | T,G | 0.9629 | 0.903  | -0.173  | 1.019   | 0.029  | 0.8648 |
| CASC15 | rs9366406   | 21617668 | T,A | 0.7397 | 0.9296 | 0.055   | 0.33    | 0.0283 | 0.8664 |
| CASC15 | rs76501983  | 21631411 | G,A | 0.9854 | 0.8228 | -0.202  | 1.215   | 0.0277 | 0.8679 |
| CASC15 | rs9350368   | 21562144 | A,G | 0.6823 | 0.3726 | 0.089   | 0.537   | 0.0274 | 0.8685 |
| CASC15 | rs79693897  | 21695822 | R,D | 0.6627 | 0.717  | -0.081  | 0.496   | 0.0268 | 0.87   |
| CASC15 | rs111412021 | 21606278 | T,C | 0.9882 | 0.8163 | -0.206  | 1.264   | 0.0265 | 0.8707 |
| CASC15 | rs146017644 | 21640727 | C,T | 0.9833 | 0.5529 | 2.596   | 16.061  | 0.0261 | 0.8716 |
| CASC15 | rs79169915  | 21607457 | G,A | 0.9882 | 0.848  | -0.203  | 1.27    | 0.0256 | 0.8728 |
| CASC15 | rs190176895 | 21629550 | C,A | 0.9877 | 0.7487 | -0.201  | 1.267   | 0.0251 | 0.8741 |
| CASC15 | rs9466164   | 21723538 | A,G | 0.8284 | 0.9494 | -0.067  | 0.422   | 0.025  | 0.8743 |
| CASC15 | rs9460659   | 21696569 | G,C | 0.6689 | 0.7266 | -0.078  | 0.496   | 0.0249 | 0.8747 |
| CASC15 | rs543173991 | 21629474 | T,A | 0.9884 | 0.7664 | -0.218  | 1.393   | 0.0246 | 0.8754 |
| CASC15 | rs113842280 | 21611571 | T,G | 0.9848 | 0.967  | -0.189  | 1.209   | 0.0243 | 0.8761 |
| CASC15 | rs73737568  | 21667546 | A,G | 0.9719 | 0.8789 | -0.186  | 1.198   | 0.0242 | 0.8763 |
| CASC15 | rs6933506   | 21673857 | T,C | 0.9717 | 0.871  | -0.184  | 1.185   | 0.0241 | 0.8765 |
| CASC15 | rs1744866   | 21631188 | C,T | 0.9885 | 0.3807 | -0.967  | 6.23    | 0.0241 | 0.8767 |
| CASC15 | rs112538002 | 21611751 | T,C | 0.9848 | 0.97   | -0.187  | 1.209   | 0.024  | 0.8768 |
| CASC15 | rs77155105  | 21682861 | C,G | 0.9671 | 0.7117 | -0.316  | 2.038   | 0.024  | 0.8768 |
| CASC15 | rs111411936 | 21626246 | G,A | 0.9877 | 0.7672 | -0.196  | 1.265   | 0.024  | 0.8769 |
| CASC15 | rs112650104 | 21611568 | C,G | 0.9871 | 0.889  | -0.195  | 1.262   | 0.024  | 0.877  |
| CASC15 | rs546083928 | 21596246 | R,I | 0.9877 | 0.6818 | -0.195  | 1.263   | 0.0239 | 0.8771 |
| CASC15 | rs7762989   | 21624153 | C,T | 0.9883 | 0.8214 | -0.196  | 1.265   | 0.0239 | 0.8771 |
| CASC15 | rs1972212   | 21743761 | C,T | 0.8703 | 0.5142 | -0.111  | 0.719   | 0.0238 | 0.8775 |
| CASC15 | rs111228858 | 21612309 | G,A | 0.9872 | 0.8945 | -0.194  | 1.26    | 0.0236 | 0.8778 |
| CASC15 | rs78923341  | 21612472 | A,C | 0.9872 | 0.895  | -0.194  | 1.26    | 0.0236 | 0.8778 |
| CASC15 | rs6934807   | 21653677 | A,G | 0.9709 | 0.9814 | -0.186  | 1.209   | 0.0236 | 0.8779 |
| CASC15 | rs73374488  | 21666188 | G,A | 0.9707 | 0.8902 | -0.184  | 1.198   | 0.0235 | 0.8781 |
| CASC15 | rs117971178 | 21674146 | C,T | 0.9852 | 0.5427 | -185.28 | 1208.73 | 0.0235 | 0.8782 |
| CASC15 | rs145952396 | 21677173 | C,T | 0.9854 | 0.5637 | -46.32  | 302.182 | 0.0235 | 0.8782 |
| CASC15 | rs147045541 | 21675767 | C,T | 0.9834 | 0.576  | -185.28 | 1208.73 | 0.0235 | 0.8782 |
| CASC15 | rs59187080  | 21668625 | G,A | 0.966  | 0.7875 | -0.153  | 1.001   | 0.0235 | 0.8782 |
| CASC15 | rs9295516   | 21673560 | C,T | 0.9483 | 0.8605 | -61.76  | 402.909 | 0.0235 | 0.8782 |
| CASC15 | rs9466126   | 21601762 | A,C | 0.9836 | 0.9467 | -185.28 | 1208.73 | 0.0235 | 0.8782 |
| CASC15 | rs9466127   | 21602745 | G,A | 0.9739 | 0.9906 | -185.28 | 1208.73 | 0.0235 | 0.8782 |
| CASC15 | rs142641808 | 21677158 | C,T | 0.9656 | 0.7625 | -0.253  | 1.656   | 0.0234 | 0.8784 |
| CASC15 | rs6941897   | 21671979 | C,A | 0.9897 | 0.6097 | -0.205  | 1.338   | 0.0234 | 0.8784 |
| CASC15 | rs9358441   | 21565339 | T,C | 0.7025 | 0.3571 | 0.085   | 0.559   | 0.0233 | 0.8786 |
| CASC15 | rs113989215 | 21665766 | A,C | 0.9131 | 0.855  | -0.095  | 0.622   | 0.0233 | 0.8787 |
| CASC15 | rs147488932 | 21672276 | G,A | 0.9657 | 0.8442 | -0.259  | 1.705   | 0.023  | 0.8795 |

|        |             |          |     |        |        |        |        |        |        |
|--------|-------------|----------|-----|--------|--------|--------|--------|--------|--------|
| CASC15 | rs1740843   | 21623041 | G,A | 0.6876 | 0.9919 | 0.044  | 0.293  | 0.023  | 0.8795 |
| CASC15 | rs75509154  | 21670162 | A,G | 0.9656 | 0.8408 | -0.258 | 1.705  | 0.0229 | 0.8796 |
| CASC15 | rs76934110  | 21669629 | G,A | 0.9626 | 0.7982 | -0.258 | 1.704  | 0.0228 | 0.8799 |
| CASC15 | rs116697959 | 21668594 | A,T | 0.9652 | 0.8312 | -0.256 | 1.705  | 0.0226 | 0.8806 |
| CASC15 | rs1744849   | 21612949 | A,G | 0.7238 | 1      | -0.046 | 0.307  | 0.0225 | 0.8809 |
| CASC15 | rs75157802  | 21678178 | A,G | 0.9675 | 0.834  | -0.249 | 1.664  | 0.0223 | 0.8812 |
| CASC15 | rs112102336 | 21677692 | G,T | 0.9639 | 0.7866 | -0.245 | 1.646  | 0.0222 | 0.8814 |
| CASC15 | rs7751397   | 21662535 | C,T | 0.9285 | 0.8402 | -0.104 | 0.702  | 0.0221 | 0.8818 |
| CASC15 | rs7738506   | 21702690 | A,T | 0.9888 | 0.6716 | -1.916 | 12.903 | 0.022  | 0.882  |
| CASC15 | rs7739186   | 21657833 | T,C | 0.9158 | 0.8085 | -0.103 | 0.696  | 0.022  | 0.8821 |
| CASC15 | rs10557323  | 21615430 | R,D | 0.9849 | 0.974  | -0.179 | 1.209  | 0.0219 | 0.8823 |
| CASC15 | rs77222012  | 21614945 | G,A | 0.9849 | 0.9755 | -0.178 | 1.209  | 0.0218 | 0.8827 |
| CASC15 | rs74492370  | 21679606 | G,A | 0.9678 | 0.8228 | -0.251 | 1.705  | 0.0217 | 0.8829 |
| CASC15 | rs78971333  | 21679601 | C,T | 0.9678 | 0.8229 | -0.251 | 1.705  | 0.0217 | 0.8829 |
| CASC15 | rs138585583 | 21678890 | R,D | 0.8749 | 0.9014 | -0.092 | 0.622  | 0.0217 | 0.883  |
| CASC15 | rs112553613 | 21616239 | A,G | 0.9848 | 0.9676 | -0.178 | 1.209  | 0.0216 | 0.8831 |
| CASC15 | rs12374633  | 21654974 | G,A | 0.9698 | 0.9337 | -0.178 | 1.211  | 0.0216 | 0.8831 |
| CASC15 | rs111232506 | 21744922 | C,T | 0.9798 | 0.3015 | -0.277 | 1.884  | 0.0216 | 0.8833 |
| CASC15 | rs80264536  | 21666345 | T,G | 0.9437 | 0.7836 | -0.237 | 1.614  | 0.0216 | 0.8833 |
| CASC15 | rs113455272 | 21616778 | T,C | 0.9824 | 0.9392 | -0.177 | 1.209  | 0.0215 | 0.8834 |
| CASC15 | rs111887738 | 21616944 | T,C | 0.9828 | 0.9369 | -0.177 | 1.209  | 0.0214 | 0.8836 |
| CASC15 | rs6935968   | 21613156 | G,A | 0.9849 | 0.9776 | -0.177 | 1.209  | 0.0213 | 0.8838 |
| CASC15 | rs75127321  | 21613946 | G,A | 0.9849 | 0.9767 | -0.177 | 1.209  | 0.0213 | 0.8838 |
| CASC15 | rs76062205  | 21666427 | C,T | 0.9438 | 0.7852 | -0.235 | 1.616  | 0.0212 | 0.8842 |
| CASC15 | rs71657670  | 21613526 | R,D | 0.9864 | 0.77   | -0.183 | 1.262  | 0.0209 | 0.885  |
| CASC15 | rs7771671   | 21662524 | T,G | 0.9284 | 0.8382 | -0.101 | 0.702  | 0.0208 | 0.8852 |
| CASC15 | rs73378032  | 21744446 | C,A | 0.9796 | 0.3201 | -0.262 | 1.828  | 0.0206 | 0.8859 |
| CASC15 | rs16885205  | 21743291 | T,C | 0.8644 | 0.5834 | -0.097 | 0.676  | 0.0204 | 0.8864 |
| CASC15 | rs1744854   | 21623686 | C,T | 0.6725 | 0.9882 | 0.042  | 0.296  | 0.0202 | 0.8869 |
| CASC15 | rs71563992  | 21655825 | G,T | 0.9888 | 0.8713 | -5.613 | 39.687 | 0.02   | 0.8875 |
| CASC15 | rs116216476 | 21700308 | T,C | 0.9886 | 0.6467 | -1.222 | 8.682  | 0.0198 | 0.8881 |
| CASC15 | rs9460657   | 21660051 | C,T | 0.8938 | 0.8161 | -0.098 | 0.696  | 0.0198 | 0.8881 |
| CASC15 | rs78870816  | 21665363 | C,T | 0.9434 | 0.7804 | -0.226 | 1.615  | 0.0196 | 0.8886 |
| CASC15 | rs6456437   | 21615443 | T,C | 0.7388 | 0.9506 | 0.046  | 0.329  | 0.0193 | 0.8894 |
| CASC15 | rs6456440   | 21658236 | C,A | 0.9344 | 0.7776 | -0.162 | 1.169  | 0.0192 | 0.8898 |
| CASC15 | rs6918842   | 21691009 | C,T | 0.5679 | 0.9924 | -0.05  | 0.359  | 0.0192 | 0.8898 |
| CASC15 | rs116300170 | 21663541 | G,A | 0.9641 | 0.8099 | -0.234 | 1.694  | 0.0191 | 0.8902 |
| CASC15 | rs62403974  | 21713978 | T,C | 0.7736 | 0.9053 | -0.056 | 0.403  | 0.019  | 0.8904 |
| CASC15 | rs1744853   | 21623386 | A,G | 0.6725 | 0.9887 | 0.041  | 0.296  | 0.0188 | 0.8909 |
| CASC15 | rs112524196 | 21743604 | G,A | 0.9794 | 0.3214 | -0.249 | 1.818  | 0.0188 | 0.891  |
| CASC15 | rs1740842   | 21623181 | G,A | 0.6726 | 0.9885 | 0.04   | 0.296  | 0.0181 | 0.893  |
| CASC15 | rs7772337   | 21726278 | C,T | 0.8256 | 0.9612 | -0.056 | 0.416  | 0.0181 | 0.893  |
| CASC15 | rs1740864   | 21668282 | G,A | 0.6096 | 0.9094 | 0.039  | 0.292  | 0.018  | 0.8934 |
| CASC15 | rs62403977  | 21725337 | C,T | 0.8232 | 0.9705 | -0.055 | 0.415  | 0.0178 | 0.8939 |
| CASC15 | rs10080820  | 21655815 | C,G | 0.983  | 0.7561 | -3.449 | 26.07  | 0.0175 | 0.8947 |

|        |             |          |     |        |        |         |         |        |        |
|--------|-------------|----------|-----|--------|--------|---------|---------|--------|--------|
| CASC15 | rs9466136   | 21653258 | C,T | 0.905  | 0.8569 | -0.08   | 0.607   | 0.0174 | 0.895  |
| CASC15 | rs145648458 | 21636404 | T,C | 0.9762 | 0.7475 | -3.301  | 25.046  | 0.0174 | 0.8951 |
| CASC15 | rs9460668   | 21727929 | C,G | 0.8216 | 0.9705 | -0.055  | 0.414   | 0.0173 | 0.8953 |
| CASC15 | rs76944255  | 21582643 | G,A | 0.981  | 0.4687 | -0.162  | 1.267   | 0.0163 | 0.8983 |
| CASC15 | rs528217121 | 21702677 | R,D | 0.9888 | 0.6785 | -1.635  | 12.825  | 0.0162 | 0.8986 |
| CASC15 | rs78098947  | 21713740 | C,T | 0.989  | 0.7788 | 46.73   | 370.295 | 0.0159 | 0.8996 |
| CASC15 | rs79164129  | 21601917 | T,C | 0.9855 | 0.3283 | -0.251  | 2.008   | 0.0157 | 0.9004 |
| CASC15 | rs80061387  | 21579793 | T,C | 0.9808 | 0.4585 | -0.159  | 1.268   | 0.0157 | 0.9004 |
| CASC15 | rs144178641 | 21622568 | C,T | 0.984  | 0.926  | -12.485 | 99.917  | 0.0156 | 0.9006 |
| CASC15 | rs140066406 | 21728813 | R,I | 0.8701 | 0.9744 | 0.09    | 0.724   | 0.0155 | 0.9009 |
| CASC15 | rs116300465 | 21738509 | T,G | 0.8638 | 0.9326 | 0.076   | 0.616   | 0.0153 | 0.9015 |
| CASC15 | rs80230506  | 21655914 | C,A | 0.9607 | 0.7829 | -0.189  | 1.534   | 0.0152 | 0.902  |
| CASC15 | rs571788443 | 21558875 | R,D | 0.8581 | 0.3304 | 0.086   | 0.701   | 0.0149 | 0.9029 |
| CASC15 | rs12333123  | 21640660 | G,A | 0.9848 | 0.7705 | -3.81   | 32.502  | 0.0137 | 0.9067 |
| CASC15 | rs1740844   | 21622871 | C,T | 0.6724 | 0.9911 | 0.033   | 0.295   | 0.0127 | 0.9102 |
| CASC15 | rs145545902 | 21735584 | D,R | 0.6454 | 0.9341 | 0.044   | 0.39    | 0.0125 | 0.9111 |
| CASC15 | rs6925119   | 21701083 | G,A | 0.6412 | 0.822  | -0.048  | 0.43    | 0.0124 | 0.9112 |
| CASC15 | rs116104882 | 21654116 | G,C | 0.9607 | 0.7845 | -0.168  | 1.511   | 0.0124 | 0.9114 |
| CASC15 | rs13219202  | 21683982 | G,A | 0.5273 | 0.7259 | -0.038  | 0.341   | 0.0123 | 0.9118 |
| CASC15 | rs149768565 | 21719941 | R,D | 0.9754 | 0.6872 | -2.964  | 27.179  | 0.0119 | 0.9131 |
| CASC15 | rs1740863   | 21670641 | C,T | 0.6246 | 0.9994 | 0.029   | 0.28    | 0.0111 | 0.9161 |
| CASC15 | rs9466145   | 21677060 | A,C | 0.6171 | 1      | 0.029   | 0.28    | 0.0111 | 0.9161 |
| CASC15 | rs1475149   | 21688142 | G,A | 0.5662 | 0.9247 | -0.039  | 0.371   | 0.011  | 0.9165 |
| CASC15 | rs1744889   | 21676795 | A,G | 0.6165 | 0.9936 | 0.029   | 0.28    | 0.0107 | 0.9176 |
| CASC15 | rs2749684   | 21676485 | C,T | 0.6168 | 0.9872 | 0.029   | 0.281   | 0.0107 | 0.9178 |
| CASC15 | rs1744885   | 21670816 | A,G | 0.4476 | 0.9803 | -0.029  | 0.281   | 0.0106 | 0.9179 |
| CASC15 | rs11966675  | 21640125 | G,A | 0.9761 | 0.7522 | -2.088  | 20.364  | 0.0105 | 0.9183 |
| CASC15 | rs9466154   | 21706155 | G,T | 0.6423 | 0.8816 | -0.04   | 0.403   | 0.0099 | 0.9209 |
| CASC15 | rs10155733  | 21639594 | C,T | 0.9761 | 0.7534 | -2.074  | 21.138  | 0.0096 | 0.9218 |
| CASC15 | rs185494084 | 21636537 | T,C | 0.9884 | 0.4475 | -0.166  | 1.72    | 0.0093 | 0.923  |
| CASC15 | rs1740854   | 21680732 | A,C | 0.6112 | 0.9639 | 0.027   | 0.283   | 0.0091 | 0.9241 |
| CASC15 | rs12333154  | 21640855 | G,A | 0.976  | 0.751  | -1.858  | 19.537  | 0.009  | 0.9242 |
| CASC15 | rs1740849   | 21619809 | G,A | 0.3637 | 0.9622 | -0.028  | 0.294   | 0.0089 | 0.9248 |
| CASC15 | rs189742413 | 21683505 | C,T | 0.984  | 0.4632 | -0.18   | 1.927   | 0.0087 | 0.9257 |
| CASC15 | rs10155732  | 21639540 | C,T | 0.9761 | 0.7536 | -1.895  | 21.161  | 0.008  | 0.9287 |
| CASC15 | rs5874829   | 21738740 | R,I | 0.8074 | 0.7675 | 0.04    | 0.446   | 0.0079 | 0.9293 |
| CASC15 | rs62406884  | 21696308 | C,T | 0.9205 | 0.414  | -0.082  | 0.924   | 0.0078 | 0.9296 |
| CASC15 | rs11433545  | 21672216 | R,I | 0.5947 | 0.6034 | 0.033   | 0.378   | 0.0077 | 0.9301 |
| CASC15 | rs35605844  | 21674022 | D,R | 0.6185 | 0.9309 | 0.025   | 0.288   | 0.0077 | 0.9303 |
| CASC15 | rs116239840 | 21722970 | A,C | 0.8218 | 0.9134 | -0.037  | 0.422   | 0.0076 | 0.9307 |
| CASC15 | rs147273446 | 21638982 | C,G | 0.9761 | 0.7533 | -1.876  | 21.873  | 0.0074 | 0.9316 |
| CASC15 | rs148317817 | 21638986 | G,A | 0.9761 | 0.7532 | -1.876  | 21.873  | 0.0074 | 0.9316 |
| CASC15 | rs79846403  | 21723244 | C,T | 0.8348 | 0.8403 | -0.038  | 0.443   | 0.0073 | 0.9317 |
| CASC15 | rs78712702  | 21700242 | T,A | 0.9843 | 0.4664 | 0.161   | 1.878   | 0.0073 | 0.9318 |
| CASC15 | rs201884896 | 21657694 | D,R | 0.9455 | 0.3238 | 0.083   | 1.005   | 0.0069 | 0.934  |

|        |             |          |     |        |        |        |         |        |        |
|--------|-------------|----------|-----|--------|--------|--------|---------|--------|--------|
| CASC15 | rs143636013 | 21649787 | G,C | 0.9413 | 0.7828 | -0.099 | 1.22    | 0.0066 | 0.9354 |
| CASC15 | rs7770799   | 21553258 | A,C | 0.9337 | 0.9722 | 0.044  | 0.556   | 0.0064 | 0.9364 |
| CASC15 | rs16885170  | 21716554 | G,A | 0.8229 | 0.9708 | 0.042  | 0.537   | 0.0061 | 0.9375 |
| CASC15 | rs67418443  | 21554442 | C,T | 0.9266 | 0.876  | 0.045  | 0.574   | 0.0061 | 0.9375 |
| CASC15 | rs146516474 | 21554348 | C,T | 0.9266 | 0.8769 | 0.045  | 0.574   | 0.0061 | 0.9377 |
| CASC15 | rs35001920  | 21676726 | R,D | 0.4775 | 0.9497 | -0.022 | 0.289   | 0.0059 | 0.9386 |
| CASC15 | rs112395953 | 21727909 | A,C | 0.885  | 0.9741 | 0.056  | 0.726   | 0.0059 | 0.9389 |
| CASC15 | rs9460660   | 21709294 | T,C | 0.616  | 0.9365 | -0.029 | 0.384   | 0.0059 | 0.939  |
| CASC15 | rs7742225   | 21685474 | G,A | 0.827  | 0.7132 | 0.04   | 0.538   | 0.0057 | 0.94   |
| CASC15 | rs149455365 | 21553549 | R,D | 0.9357 | 0.9431 | 0.042  | 0.571   | 0.0054 | 0.9414 |
| CASC15 | rs9460651   | 21622531 | G,T | 0.672  | 0.9951 | 0.021  | 0.295   | 0.0053 | 0.9419 |
| CASC15 | rs35857450  | 21622415 | D,R | 0.6703 | 0.8902 | 0.023  | 0.316   | 0.0052 | 0.9424 |
| CASC15 | rs1740851   | 21616268 | T,C | 0.7152 | 0.9852 | -0.022 | 0.305   | 0.0052 | 0.9425 |
| CASC15 | rs59759742  | 21707319 | T,G | 0.6009 | 0.9285 | -0.028 | 0.391   | 0.0051 | 0.9429 |
| CASC15 | rs7773111   | 21696531 | G,A | 0.6146 | 0.751  | 0.033  | 0.469   | 0.005  | 0.9434 |
| CASC15 | rs150555050 | 21561633 | G,A | 0.9894 | 0.5125 | -11.11 | 157.686 | 0.005  | 0.9438 |
| CASC15 | rs9466168   | 21734750 | C,T | 0.8215 | 0.9954 | 0.028  | 0.397   | 0.0049 | 0.9441 |
| CASC15 | rs57761609  | 21683420 | D,R | 0.6127 | 0.8292 | 0.02   | 0.309   | 0.0044 | 0.9471 |
| CASC15 | rs9358442   | 21573637 | G,A | 0.7034 | 0.4581 | 0.03   | 0.47    | 0.0042 | 0.9484 |
| CASC15 | rs369470901 | 21707320 | R,I | 0.6014 | 0.9269 | -0.025 | 0.391   | 0.0042 | 0.9485 |
| CASC15 | rs114977922 | 21638119 | C,G | 0.9762 | 0.7437 | -1.493 | 23.381  | 0.0041 | 0.9491 |
| CASC15 | rs7751661   | 21621850 | G,A | 0.6705 | 1      | 0.019  | 0.294   | 0.004  | 0.9498 |
| CASC15 | rs9466161   | 21722916 | T,C | 0.7866 | 0.8907 | -0.025 | 0.419   | 0.0035 | 0.953  |
| CASC15 | rs147276150 | 21701200 | A,G | 0.9274 | 0.4176 | -0.054 | 0.916   | 0.0035 | 0.9531 |
| CASC15 | rs1740865   | 21668071 | C,A | 0.5314 | 0.8949 | -0.017 | 0.294   | 0.0033 | 0.9541 |
| CASC15 | rs11961107  | 21642740 | G,A | 0.9758 | 0.7454 | -0.905 | 16.188  | 0.0031 | 0.9554 |
| CASC15 | rs7739775   | 21727465 | C,T | 0.87   | 0.9769 | 0.04   | 0.724   | 0.0031 | 0.9554 |
| CASC15 | rs73374447  | 21636151 | C,T | 0.9753 | 0.3    | 0.106  | 1.936   | 0.003  | 0.9562 |
| CASC15 | rs9466141   | 21673993 | C,T | 0.9236 | 0.9976 | 20.698 | 386.249 | 0.0029 | 0.9573 |
| CASC15 | rs12332790  | 21642505 | C,T | 0.9758 | 0.7456 | -0.866 | 16.331  | 0.0028 | 0.9577 |
| CASC15 | rs138882930 | 21638300 | A,G | 0.9761 | 0.7432 | -1.223 | 23.114  | 0.0028 | 0.9578 |
| CASC15 | rs150184400 | 21642793 | T,C | 0.9758 | 0.7454 | -0.826 | 16.061  | 0.0026 | 0.959  |
| CASC15 | rs7772583   | 21726279 | G,A | 0.6306 | 0.9061 | -0.02  | 0.394   | 0.0026 | 0.9595 |
| CASC15 | rs9466163   | 21723532 | C,T | 0.809  | 0.9768 | -0.019 | 0.396   | 0.0024 | 0.961  |
| CASC15 | rs912025    | 21716058 | C,G | 0.8371 | 0.9358 | -0.027 | 0.568   | 0.0023 | 0.9618 |
| CASC15 | rs6456442   | 21698279 | T,C | 0.5821 | 0.821  | 0.02   | 0.428   | 0.0023 | 0.9619 |
| CASC15 | rs9460664   | 21723621 | G,A | 0.8102 | 0.9858 | -0.019 | 0.394   | 0.0023 | 0.9619 |
| CASC15 | rs10080752  | 21655608 | C,G | 0.9819 | 0.7225 | -0.928 | 20.932  | 0.002  | 0.9646 |
| CASC15 | rs1555287   | 21686091 | G,A | 0.5629 | 0.8575 | -0.017 | 0.381   | 0.0019 | 0.9652 |
| CASC15 | rs548416728 | 21647978 | R,D | 0.9747 | 0.6618 | -0.505 | 11.563  | 0.0019 | 0.9652 |
| CASC15 | rs9295515   | 21641667 | C,T | 0.976  | 0.7495 | -0.805 | 18.645  | 0.0019 | 0.9656 |
| CASC15 | rs2180418   | 21690172 | A,G | 0.8397 | 0.9885 | 0.02   | 0.463   | 0.0018 | 0.9659 |
| CASC15 | rs9348480   | 21617782 | G,A | 0.7922 | 0.9408 | 0.015  | 0.357   | 0.0018 | 0.9664 |
| CASC15 | rs62404141  | 21614140 | G,A | 0.8281 | 0.9622 | 0.015  | 0.361   | 0.0016 | 0.9677 |
| CASC15 | rs6926491   | 21724670 | G,A | 0.8091 | 0.9926 | -0.016 | 0.393   | 0.0016 | 0.9677 |

|        |             |          |     |        |        |        |         |        |        |
|--------|-------------|----------|-----|--------|--------|--------|---------|--------|--------|
| CASC15 | rs7772163   | 21726011 | G,C | 0.8088 | 0.9857 | -0.016 | 0.393   | 0.0016 | 0.9677 |
| CASC15 | rs9466165   | 21724322 | T,C | 0.8089 | 0.9953 | -0.016 | 0.393   | 0.0016 | 0.9679 |
| CASC15 | rs1973986   | 21687571 | A,T | 0.5557 | 0.8895 | -0.015 | 0.376   | 0.0016 | 0.9681 |
| CASC15 | rs72317305  | 21669872 | R,D | 0.5156 | 0.9662 | -0.011 | 0.284   | 0.0016 | 0.9686 |
| CASC15 | rs66735249  | 21686666 | D,R | 0.551  | 0.8357 | -0.015 | 0.384   | 0.0015 | 0.9687 |
| CASC15 | rs1740855   | 21680782 | C,T | 0.5021 | 0.9879 | -0.011 | 0.283   | 0.0015 | 0.9691 |
| CASC15 | rs16885175  | 21726770 | A,G | 0.8585 | 0.8892 | -0.028 | 0.731   | 0.0014 | 0.9698 |
| CASC15 | rs6925679   | 21724480 | A,G | 0.8086 | 1      | -0.015 | 0.392   | 0.0014 | 0.9698 |
| CASC15 | rs9460665   | 21724144 | G,A | 0.8084 | 1      | -0.015 | 0.392   | 0.0014 | 0.9698 |
| CASC15 | rs9460666   | 21726380 | G,A | 0.9296 | 0.3512 | -0.056 | 1.498   | 0.0014 | 0.9702 |
| CASC15 | rs34987769  | 21678839 | R,I | 0.5043 | 0.9785 | -0.01  | 0.283   | 0.0014 | 0.9705 |
| CASC15 | rs117804382 | 21656810 | C,T | 0.9855 | 0.5625 | -1.529 | 41.555  | 0.0014 | 0.9706 |
| CASC15 | rs1744894   | 21680886 | T,C | 0.4962 | 0.9953 | -0.01  | 0.283   | 0.0014 | 0.9706 |
| CASC15 | rs199690993 | 21646009 | R,D | 0.9762 | 0.3058 | 0.071  | 1.987   | 0.0013 | 0.9714 |
| CASC15 | rs1744893   | 21680746 | T,C | 0.5019 | 0.987  | -0.01  | 0.283   | 0.0013 | 0.9716 |
| CASC15 | rs1740861   | 21678006 | T,C | 0.5038 | 0.9738 | -0.01  | 0.282   | 0.0012 | 0.9721 |
| CASC15 | rs35528538  | 21613493 | R,D | 0.8281 | 0.9642 | 0.013  | 0.361   | 0.0012 | 0.9721 |
| CASC15 | rs1744886   | 21671092 | A,T | 0.5151 | 0.9725 | -0.01  | 0.283   | 0.0012 | 0.9723 |
| CASC15 | rs1744895   | 21680899 | G,C | 0.4958 | 1      | -0.01  | 0.281   | 0.0012 | 0.9725 |
| CASC15 | rs60048426  | 21556513 | G,A | 0.947  | 0.5576 | 0.031  | 0.903   | 0.0012 | 0.9727 |
| CASC15 | rs1744892   | 21680206 | A,G | 0.4953 | 0.9943 | -0.01  | 0.281   | 0.0011 | 0.973  |
| CASC15 | rs1744896   | 21681103 | A,G | 0.5038 | 0.9407 | -0.01  | 0.291   | 0.0011 | 0.973  |
| CASC15 | rs6941630   | 21679102 | C,T | 0.5039 | 0.9783 | -0.009 | 0.282   | 0.0011 | 0.9731 |
| CASC15 | rs1744891   | 21679835 | G,A | 0.5058 | 0.9872 | -0.009 | 0.282   | 0.0011 | 0.9738 |
| CASC15 | rs1740856   | 21681223 | G,A | 0.5041 | 0.9379 | -0.009 | 0.291   | 0.001  | 0.9744 |
| CASC15 | rs9466133   | 21643948 | C,T | 0.9757 | 0.7442 | -0.46  | 15.157  | 0.0009 | 0.9758 |
| CASC15 | rs9460650   | 21615371 | T,C | 0.9841 | 0.9776 | 4.264  | 144.971 | 0.0009 | 0.9765 |
| CASC15 | rs9460656   | 21643907 | A,G | 0.9758 | 0.7442 | -0.419 | 15.284  | 0.0008 | 0.9781 |
| CASC15 | rs1740858   | 21682180 | C,T | 0.507  | 0.8636 | -0.008 | 0.304   | 0.0006 | 0.9797 |
| CASC15 | rs1740857   | 21681617 | T,G | 0.5067 | 0.8693 | -0.008 | 0.303   | 0.0006 | 0.98   |
| CASC15 | rs1740859   | 21682298 | C,T | 0.5072 | 0.8627 | -0.008 | 0.304   | 0.0006 | 0.9802 |
| CASC15 | rs12200574  | 21683353 | G,A | 0.5092 | 0.842  | -0.008 | 0.308   | 0.0006 | 0.9804 |
| CASC15 | rs1740853   | 21684065 | G,A | 0.5152 | 0.7328 | -0.008 | 0.331   | 0.0006 | 0.9804 |
| CASC15 | rs13219086  | 21683929 | G,C | 0.5137 | 0.7654 | -0.008 | 0.323   | 0.0006 | 0.9807 |
| CASC15 | rs139032454 | 21644326 | A,C | 0.9757 | 0.7441 | -0.355 | 14.964  | 0.0006 | 0.9811 |
| CASC15 | rs2181318   | 21691468 | T,C | 0.549  | 0.9168 | 0.009  | 0.365   | 0.0006 | 0.9812 |
| CASC15 | rs2759362   | 21681885 | G,A | 0.5173 | 0.8653 | -0.007 | 0.304   | 0.0006 | 0.9812 |
| CASC15 | rs143393812 | 21633911 | C,T | 0.9816 | 0.5752 | 0.391  | 18.489  | 0.0004 | 0.9831 |
| CASC15 | rs111404042 | 21565201 | G,A | 0.9548 | 0.5207 | 0.019  | 0.922   | 0.0004 | 0.9836 |
| CASC15 | rs1744851   | 21619810 | T,C | 0.7153 | 0.9819 | 0.006  | 0.3     | 0.0004 | 0.9837 |
| CASC15 | rs1740845   | 21621731 | G,A | 0.6871 | 0.9929 | 0.006  | 0.299   | 0.0004 | 0.9841 |
| CASC15 | rs562901644 | 21554922 | R,D | 0.9157 | 0.7168 | 0.012  | 0.582   | 0.0004 | 0.9841 |
| CASC15 | rs7763048   | 21681780 | G,A | 0.4974 | 0.8635 | -0.006 | 0.302   | 0.0004 | 0.9841 |
| CASC15 | rs77394991  | 21735578 | C,T | 0.8447 | 0.9263 | 0.012  | 0.59    | 0.0004 | 0.9842 |
| CASC15 | rs4327678   | 21619771 | T,C | 0.7132 | 0.9834 | 0.006  | 0.299   | 0.0004 | 0.9848 |

|        |             |          |     |        |        |        |        |        |        |
|--------|-------------|----------|-----|--------|--------|--------|--------|--------|--------|
| CASC15 | rs149019701 | 21621670 | D,R | 0.6874 | 0.9939 | 0.006  | 0.299  | 0.0004 | 0.985  |
| CASC15 | rs1744852   | 21621724 | A,G | 0.6871 | 0.9927 | 0.006  | 0.299  | 0.0003 | 0.9851 |
| CASC15 | rs34197291  | 21611277 | R,D | 0.7729 | 0.7368 | -0.007 | 0.388  | 0.0003 | 0.9852 |
| CASC15 | rs542285387 | 21621459 | I,R | 0.6862 | 0.9884 | 0.005  | 0.3    | 0.0003 | 0.9871 |
| CASC15 | rs527350470 | 21640569 | R,D | 0.9745 | 0.7043 | 0.335  | 20.945 | 0.0003 | 0.9872 |
| CASC15 | rs13215657  | 21683714 | C,T | 0.511  | 0.7765 | -0.005 | 0.32   | 0.0003 | 0.9873 |
| CASC15 | rs1989470   | 21715067 | T,A | 0.5732 | 0.9562 | -0.006 | 0.362  | 0.0003 | 0.9874 |
| CASC15 | rs150235785 | 21638293 | G,A | 0.9849 | 0.7598 | -0.549 | 38.578 | 0.0002 | 0.9886 |
| CASC15 | rs147268567 | 21621169 | D,R | 0.6874 | 0.993  | 0.003  | 0.3    | 0.0001 | 0.9911 |
| CASC15 | rs4712631   | 21710896 | C,T | 0.586  | 0.9993 | 0.003  | 0.355  | 0.0001 | 0.9927 |
| CASC15 | rs9466156   | 21711491 | C,T | 0.5874 | 0.9998 | 0.003  | 0.355  | 0.0001 | 0.9927 |
| CASC15 | rs9368326   | 21590104 | A,G | 0.8056 | 0.5535 | -0.003 | 0.475  | 0      | 0.9947 |
| CASC15 | rs80309179  | 21644884 | G,T | 0.9894 | 0.4434 | 0.05   | 8.225  | 0      | 0.9951 |
| CASC15 | rs1740847   | 21620469 | C,A | 0.6882 | 0.9889 | 0.002  | 0.301  | 0      | 0.9954 |
| CASC15 | rs1740846   | 21621045 | A,G | 0.6874 | 0.9924 | 0.002  | 0.3    | 0      | 0.9955 |
| CASC15 | rs1740850   | 21618925 | C,G | 0.7147 | 0.9839 | 0.001  | 0.301  | 0      | 0.9963 |
| CASC15 | rs1744850   | 21618916 | G,T | 0.7128 | 0.9828 | 0.001  | 0.301  | 0      | 0.9965 |
| CASC15 | rs7741780   | 21685460 | A,G | 0.8336 | 0.732  | -0.002 | 0.527  | 0      | 0.9975 |
| CASC15 | rs1740848   | 21620293 | G,A | 0.6882 | 0.9886 | 0.001  | 0.301  | 0      | 0.9978 |
| CASC15 | rs12664833  | 21614978 | T,G | 0.8033 | 0.9552 | 0.001  | 0.359  | 0      | 0.9982 |
| CASC15 | rs7759495   | 21706044 | G,A | 0.6142 | 0.9046 | 0      | 0.383  | 0      | 0.9996 |
| CASC15 | rs2749681   | 21683792 | A,G | 0.5085 | 0.771  | 0      | 0.322  | 0      | 0.9997 |
| CASC15 | rs548873349 | 21736947 | R,I | 0.8405 | 0.7508 | 0      | 0.648  | 0      | 0.9998 |
| CASC15 | rs7739235   | 21609345 | A,T | 0.9799 | 0.962  | 0      | 1E+15  | 0      | 1      |
| CASC15 | rs7740142   | 21609635 | G,A | 0.9809 | 0.955  | 0      | 1E+15  | 0      | 1      |
| CASC15 | rs9460649   | 21614884 | G,A | 0.9843 | 0.994  | 0      | 1E+15  | 0      | 1      |

SNP association with **CDKAL1** sorted by p-value

|        |             |          |     |        |        |         |         |        |         |
|--------|-------------|----------|-----|--------|--------|---------|---------|--------|---------|
| CDKAL1 | rs78584681  | 21743570 | R,D | 0.7497 | 0.6177 | 0.225   | 0.078   | 8.3539 | 0.00385 |
| CDKAL1 | rs74926222  | 21568994 | C,T | 0.9816 | 0.3776 | 24.845  | 8.929   | 7.7431 | 0.00539 |
| CDKAL1 | rs76714354  | 21572464 | A,G | 0.9805 | 0.3806 | 23.934  | 8.969   | 7.1217 | 0.00762 |
| CDKAL1 | rs80177376  | 21744978 | C,T | 0.9048 | 0.3545 | 0.241   | 0.09    | 7.0822 | 0.00779 |
| CDKAL1 | rs114750919 | 21725361 | C,G | 0.9867 | 0.8444 | -245.64 | 102.084 | 5.79   | 0.01612 |
| CDKAL1 | rs73737558  | 21577723 | A,G | 0.9837 | 0.4293 | 19.641  | 8.176   | 5.7711 | 0.01629 |
| CDKAL1 | rs150345835 | 21568080 | R,D | 0.983  | 0.3784 | 20.644  | 8.601   | 5.7606 | 0.01639 |
| CDKAL1 | rs72175369  | 21738076 | R,D | 0.9214 | 0.781  | 0.189   | 0.08    | 5.5387 | 0.0186  |
| CDKAL1 | rs12189901  | 21726940 | G,A | 0.9308 | 0.9638 | 0.177   | 0.078   | 5.0977 | 0.02396 |
| CDKAL1 | rs112039884 | 21729100 | C,T | 0.9274 | 0.9676 | 0.174   | 0.078   | 5.0258 | 0.02497 |
| CDKAL1 | rs75327712  | 21728829 | G,A | 0.9295 | 0.9778 | 0.174   | 0.078   | 5.0258 | 0.02497 |
| CDKAL1 | rs10946466  | 21727456 | C,A | 0.9298 | 0.9928 | 0.174   | 0.078   | 5.0251 | 0.02498 |
| CDKAL1 | rs12206842  | 21734489 | A,T | 0.9372 | 1      | 0.174   | 0.078   | 5.0251 | 0.02498 |
| CDKAL1 | rs9358449   | 21732383 | G,A | 0.937  | 0.9915 | 0.174   | 0.078   | 5.0223 | 0.02502 |
| CDKAL1 | rs7451817   | 21735497 | A,C | 0.9341 | 0.9124 | 0.175   | 0.078   | 5.0085 | 0.02522 |
| CDKAL1 | rs79949484  | 21728966 | G,A | 0.9319 | 0.8819 | 0.191   | 0.086   | 4.9246 | 0.02648 |
| CDKAL1 | rs9348484   | 21731460 | C,G | 0.93   | 0.9619 | 0.173   | 0.078   | 4.8921 | 0.02698 |
| CDKAL1 | rs9358448   | 21731736 | G,A | 0.9305 | 0.9625 | 0.173   | 0.078   | 4.8904 | 0.02701 |

|        |             |          |     |        |        |         |         |        |         |
|--------|-------------|----------|-----|--------|--------|---------|---------|--------|---------|
| CDKAL1 | rs7739131   | 21727148 | C,T | 0.7149 | 0.9794 | 0.13    | 0.064   | 4.1061 | 0.04273 |
| CDKAL1 | rs138380902 | 21731187 | R,D | 0.9079 | 0.9299 | 0.145   | 0.076   | 3.5995 | 0.0578  |
| CDKAL1 | rs2328627   | 21714362 | G,A | 0.9889 | 0.782  | -168.8  | 90.064  | 3.5127 | 0.0609  |
| CDKAL1 | rs141898580 | 21709985 | C,T | 0.9816 | 0.8379 | -18.782 | 10.029  | 3.5075 | 0.06109 |
| CDKAL1 | rs35578300  | 21741886 | R,D | 0.7077 | 0.8309 | 0.12    | 0.064   | 3.5039 | 0.06122 |
| CDKAL1 | rs115395409 | 21696639 | C,T | 0.99   | 0.5674 | -2.586  | 1.382   | 3.5029 | 0.06126 |
| CDKAL1 | rs1853345   | 21742346 | T,C | 0.73   | 0.9808 | 0.108   | 0.058   | 3.4601 | 0.06287 |
| CDKAL1 | rs145825998 | 21695945 | T,G | 0.9899 | 0.5601 | -2.542  | 1.398   | 3.3046 | 0.06909 |
| CDKAL1 | rs540918539 | 21717464 | R,D | 0.9882 | 0.804  | -159.33 | 90.064  | 3.1296 | 0.07688 |
| CDKAL1 | rs71563994  | 21668435 | T,C | 0.9731 | 0.7255 | -35.908 | 20.462  | 3.0794 | 0.07929 |
| CDKAL1 | rs558880181 | 21699974 | R,D | 0.9241 | 0.5575 | -0.485  | 0.278   | 3.0355 | 0.08146 |
| CDKAL1 | rs35922627  | 21667988 | A,T | 0.973  | 0.7238 | -33.534 | 19.603  | 2.9262 | 0.08715 |
| CDKAL1 | rs6906888   | 21697966 | G,A | 0.9391 | 0.5729 | -0.575  | 0.338   | 2.8903 | 0.08912 |
| CDKAL1 | rs144222210 | 21726206 | C,T | 0.987  | 0.7975 | -1.232  | 0.725   | 2.8877 | 0.08926 |
| CDKAL1 | rs6906248   | 21697889 | A,G | 0.9391 | 0.5714 | -0.58   | 0.342   | 2.8853 | 0.08939 |
| CDKAL1 | rs75062640  | 21722533 | A,G | 0.9823 | 0.8162 | -1.205  | 0.71    | 2.8848 | 0.08942 |
| CDKAL1 | rs76144443  | 21697748 | A,G | 0.9391 | 0.5709 | -0.582  | 0.343   | 2.8842 | 0.08945 |
| CDKAL1 | rs6929045   | 21697861 | T,C | 0.9391 | 0.5712 | -0.581  | 0.342   | 2.8841 | 0.08946 |
| CDKAL1 | rs6928871   | 21697812 | T,C | 0.9391 | 0.571  | -0.581  | 0.342   | 2.8828 | 0.08953 |
| CDKAL1 | rs78471563  | 21679073 | T,A | 0.9895 | 0.9404 | -203.8  | 120.121 | 2.8785 | 0.08977 |
| CDKAL1 | rs149555362 | 21726144 | T,C | 0.9879 | 0.8456 | -1.23   | 0.725   | 2.8775 | 0.08982 |
| CDKAL1 | rs111357910 | 21723888 | A,G | 0.988  | 0.8511 | -1.21   | 0.714   | 2.8752 | 0.08996 |
| CDKAL1 | rs115731554 | 21723090 | C,T | 0.9877 | 0.8291 | -1.206  | 0.712   | 2.8696 | 0.09026 |
| CDKAL1 | rs78529444  | 21722481 | A,G | 0.9876 | 0.8222 | -1.206  | 0.712   | 2.8696 | 0.09026 |
| CDKAL1 | rs6929483   | 21698094 | T,C | 0.9394 | 0.583  | -0.534  | 0.316   | 2.8509 | 0.09133 |
| CDKAL1 | rs6929294   | 21698041 | T,G | 0.9394 | 0.5831 | -0.535  | 0.317   | 2.8473 | 0.09153 |
| CDKAL1 | rs60309622  | 21698465 | C,T | 0.9414 | 0.5673 | -0.531  | 0.315   | 2.8461 | 0.09159 |
| CDKAL1 | rs112103466 | 21699063 | T,C | 0.9395 | 0.5894 | -0.513  | 0.305   | 2.8342 | 0.09228 |
| CDKAL1 | rs58699714  | 21698897 | C,T | 0.9395 | 0.5888 | -0.515  | 0.306   | 2.8338 | 0.0923  |
| CDKAL1 | rs112047759 | 21699028 | T,C | 0.9395 | 0.5892 | -0.514  | 0.305   | 2.8308 | 0.09247 |
| CDKAL1 | rs9466153   | 21700048 | C,T | 0.9445 | 0.5887 | -0.507  | 0.304   | 2.7778 | 0.09558 |
| CDKAL1 | rs79381952  | 21699489 | T,C | 0.9398 | 0.6026 | -0.474  | 0.286   | 2.7396 | 0.09789 |
| CDKAL1 | rs7775517   | 21699901 | T,G | 0.9389 | 0.6039 | -0.464  | 0.282   | 2.7184 | 0.0992  |
| CDKAL1 | rs7755254   | 21699892 | C,T | 0.9389 | 0.6037 | -0.465  | 0.282   | 2.7162 | 0.09934 |
| CDKAL1 | rs16885170  | 21716554 | G,A | 0.8229 | 0.9708 | -0.166  | 0.101   | 2.7104 | 0.0997  |
| CDKAL1 | rs2144867   | 21689100 | C,T | 0.9874 | 0.3281 | -0.648  | 0.407   | 2.534  | 0.1114  |
| CDKAL1 | rs7740084   | 21727531 | A,G | 0.4005 | 0.9983 | -0.091  | 0.058   | 2.4743 | 0.1157  |
| CDKAL1 | rs7764209   | 21727755 | A,T | 0.4006 | 0.9953 | -0.091  | 0.058   | 2.4636 | 0.1165  |
| CDKAL1 | rs7744078   | 21727822 | G,C | 0.4006 | 0.9944 | -0.091  | 0.058   | 2.4594 | 0.1168  |
| CDKAL1 | rs1407655   | 21727902 | G,A | 0.4028 | 0.9882 | -0.091  | 0.058   | 2.4505 | 0.1175  |
| CDKAL1 | rs1830667   | 21728089 | G,T | 0.4027 | 0.9868 | -0.091  | 0.058   | 2.4382 | 0.1184  |
| CDKAL1 | rs6456443   | 21716233 | G,A | 0.9818 | 0.9202 | -83.591 | 53.668  | 2.4259 | 0.1193  |
| CDKAL1 | rs2180419   | 21728317 | A,G | 0.4028 | 0.9843 | -0.091  | 0.058   | 2.4204 | 0.1198  |
| CDKAL1 | rs840985    | 21744508 | G,A | 0.5605 | 0.3093 | -0.154  | 0.1     | 2.37   | 0.1237  |
| CDKAL1 | rs557872691 | 21603474 | R,D | 0.8825 | 0.5572 | -0.264  | 0.172   | 2.3555 | 0.1248  |



|        |             |          |     |        |        |         |        |        |        |
|--------|-------------|----------|-----|--------|--------|---------|--------|--------|--------|
| CDKAL1 | rs112524196 | 21743604 | G,A | 0.9794 | 0.3214 | -0.525  | 0.342  | 2.3554 | 0.1249 |
| CDKAL1 | rs10636012  | 21727515 | I,R | 0.4062 | 0.9929 | -0.089  | 0.058  | 2.3507 | 0.1252 |
| CDKAL1 | rs111232506 | 21744922 | C,T | 0.9798 | 0.3015 | -0.544  | 0.355  | 2.3501 | 0.1253 |
| CDKAL1 | rs73378032  | 21744446 | C,A | 0.9796 | 0.3201 | -0.526  | 0.344  | 2.3404 | 0.1261 |
| CDKAL1 | rs145778004 | 21696926 | R,I | 0.9468 | 0.5319 | -0.639  | 0.422  | 2.2891 | 0.1303 |
| CDKAL1 | rs139419250 | 21696871 | R,I | 0.9475 | 0.5307 | -0.637  | 0.422  | 2.2791 | 0.1311 |
| CDKAL1 | rs6900485   | 21697055 | A,T | 0.9471 | 0.5382 | -0.632  | 0.42   | 2.2622 | 0.1326 |
| CDKAL1 | rs6900676   | 21697176 | A,G | 0.9471 | 0.5384 | -0.63   | 0.42   | 2.2547 | 0.1332 |
| CDKAL1 | rs11284636  | 21591706 | R,D | 0.9858 | 0.4225 | -6.805  | 4.557  | 2.2301 | 0.1353 |
| CDKAL1 | rs60368679  | 21746134 | C,T | 0.9868 | 0.3206 | -0.546  | 0.372  | 2.1521 | 0.1424 |
| CDKAL1 | rs35210528  | 21667781 | T,C | 0.9732 | 0.7254 | -26.285 | 17.976 | 2.1381 | 0.1437 |
| CDKAL1 | rs75994264  | 21745903 | C,T | 0.9868 | 0.3369 | -0.53   | 0.364  | 2.1211 | 0.1453 |
| CDKAL1 | rs115061151 | 21659040 | A,C | 0.9843 | 0.4916 | -12.776 | 8.803  | 2.1062 | 0.1467 |
| CDKAL1 | rs9460669   | 21729251 | A,G | 0.4053 | 0.9459 | -0.087  | 0.06   | 2.0843 | 0.1488 |
| CDKAL1 | rs6456441   | 21658313 | A,T | 0.9842 | 0.4898 | -11.504 | 7.978  | 2.0791 | 0.1493 |
| CDKAL1 | rs116342166 | 21630548 | T,C | 0.9891 | 0.5558 | -10.372 | 7.198  | 2.0763 | 0.1496 |
| CDKAL1 | rs548873349 | 21736947 | R,I | 0.8405 | 0.7508 | -0.176  | 0.122  | 2.076  | 0.1496 |
| CDKAL1 | rs147795739 | 21606396 | C,G | 0.9894 | 0.6082 | -9.182  | 6.4    | 2.0585 | 0.1514 |
| CDKAL1 | rs145960980 | 21729330 | D,R | 0.4093 | 0.9758 | -0.084  | 0.059  | 2.0242 | 0.1548 |
| CDKAL1 | rs79753782  | 21594201 | C,A | 0.9506 | 0.6778 | -0.264  | 0.187  | 2.0061 | 0.1567 |
| CDKAL1 | rs912025    | 21716058 | C,G | 0.8371 | 0.9358 | -0.151  | 0.107  | 1.9947 | 0.1579 |
| CDKAL1 | rs9466125   | 21601156 | A,G | 0.9295 | 0.9574 | -0.232  | 0.164  | 1.9892 | 0.1584 |
| CDKAL1 | rs111482236 | 21588455 | T,C | 0.9537 | 0.6111 | -0.274  | 0.195  | 1.9815 | 0.1592 |
| CDKAL1 | rs78502915  | 21591248 | G,T | 0.9567 | 0.6759 | -0.269  | 0.191  | 1.9781 | 0.1596 |
| CDKAL1 | rs11965374  | 21629739 | T,G | 0.9653 | 0.7623 | -0.238  | 0.169  | 1.972  | 0.1602 |
| CDKAL1 | rs78030412  | 21631511 | T,C | 0.9731 | 0.7032 | -0.24   | 0.171  | 1.9611 | 0.1614 |
| CDKAL1 | rs78523587  | 21614133 | G,A | 0.9764 | 0.7872 | -0.237  | 0.169  | 1.956  | 0.1619 |
| CDKAL1 | rs77625474  | 21604127 | G,T | 0.9308 | 0.9762 | -0.229  | 0.164  | 1.9478 | 0.1628 |
| CDKAL1 | rs76428292  | 21629756 | C,A | 0.974  | 0.7112 | -0.24   | 0.172  | 1.9446 | 0.1632 |
| CDKAL1 | rs114266456 | 21633347 | G,A | 0.9661 | 0.7099 | -0.261  | 0.187  | 1.9427 | 0.1634 |
| CDKAL1 | rs6921422   | 21600523 | C,A | 0.9308 | 0.9908 | -0.228  | 0.164  | 1.9424 | 0.1634 |
| CDKAL1 | rs147960757 | 21606492 | G,T | 0.9772 | 0.8203 | -0.235  | 0.169  | 1.9419 | 0.1635 |
| CDKAL1 | rs113534734 | 21596349 | R,D | 0.9404 | 0.7354 | -0.255  | 0.183  | 1.9395 | 0.1637 |
| CDKAL1 | rs146269383 | 21601263 | G,A | 0.9772 | 0.8168 | -0.235  | 0.169  | 1.94   | 0.1637 |
| CDKAL1 | rs9466124   | 21599700 | A,G | 0.9309 | 0.9964 | -0.228  | 0.164  | 1.9388 | 0.1638 |
| CDKAL1 | rs11281983  | 21600430 | R,I | 0.9309 | 0.9934 | -0.228  | 0.164  | 1.9378 | 0.1639 |
| CDKAL1 | rs16885105  | 21598981 | C,T | 0.9309 | 0.9869 | -0.229  | 0.165  | 1.9376 | 0.1639 |
| CDKAL1 | rs150071402 | 21610552 | G,A | 0.9896 | 0.5952 | -9.417  | 6.796  | 1.92   | 0.1659 |
| CDKAL1 | rs77708052  | 21605375 | C,T | 0.98   | 0.7948 | -0.258  | 0.186  | 1.9091 | 0.1671 |
| CDKAL1 | rs74329629  | 21583401 | G,A | 0.9656 | 0.5138 | -0.286  | 0.207  | 1.907  | 0.1673 |
| CDKAL1 | rs7753451   | 21607833 | T,C | 0.9894 | 0.606  | -8.855  | 6.46   | 1.8792 | 0.1704 |
| CDKAL1 | rs75051132  | 21589799 | T,A | 0.98   | 0.6365 | -0.292  | 0.215  | 1.84   | 0.1749 |
| CDKAL1 | rs75159243  | 21656071 | A,T | 0.9838 | 0.4842 | -7.169  | 5.285  | 1.84   | 0.1749 |
| CDKAL1 | rs12191413  | 21740465 | A,T | 0.7737 | 0.8456 | 0.088   | 0.065  | 1.8275 | 0.1764 |
| CDKAL1 | rs76401928  | 21586715 | G,A | 0.9419 | 0.6097 | -0.16   | 0.12   | 1.7879 | 0.1812 |

|        |             |          |     |        |        |         |        |        |        |
|--------|-------------|----------|-----|--------|--------|---------|--------|--------|--------|
| CDKAL1 | rs111503674 | 21585461 | T,C | 0.941  | 0.5927 | -0.161  | 0.121  | 1.7868 | 0.1813 |
| CDKAL1 | rs112243204 | 21582142 | T,C | 0.9498 | 0.5703 | -0.164  | 0.123  | 1.7872 | 0.1813 |
| CDKAL1 | rs79521243  | 21581049 | T,C | 0.9405 | 0.5684 | -0.162  | 0.122  | 1.7716 | 0.1832 |
| CDKAL1 | rs117396734 | 21615374 | A,T | 0.9894 | 0.5869 | -8.304  | 6.245  | 1.7682 | 0.1836 |
| CDKAL1 | rs77401992  | 21579608 | A,G | 0.9474 | 0.5364 | -0.164  | 0.124  | 1.758  | 0.1849 |
| CDKAL1 | rs75228175  | 21579117 | C,T | 0.9479 | 0.5358 | -0.165  | 0.124  | 1.7554 | 0.1852 |
| CDKAL1 | rs7754702   | 21696403 | T,C | 0.9482 | 0.5267 | -0.507  | 0.383  | 1.7516 | 0.1857 |
| CDKAL1 | rs116443937 | 21600982 | A,T | 0.9889 | 0.6106 | -8.628  | 6.547  | 1.7367 | 0.1876 |
| CDKAL1 | rs35487983  | 21739331 | R,D | 0.6885 | 0.8315 | 0.084   | 0.064  | 1.7332 | 0.188  |
| CDKAL1 | rs77394991  | 21735578 | C,T | 0.8447 | 0.9263 | -0.146  | 0.111  | 1.7332 | 0.188  |
| CDKAL1 | rs59015153  | 21574306 | T,A | 0.9504 | 0.4712 | -0.287  | 0.22   | 1.7049 | 0.1916 |
| CDKAL1 | rs531584400 | 21574100 | R,D | 0.9506 | 0.471  | -0.288  | 0.22   | 1.7026 | 0.192  |
| CDKAL1 | rs112653724 | 21576915 | G,A | 0.9388 | 0.5234 | -0.164  | 0.126  | 1.7009 | 0.1922 |
| CDKAL1 | rs7754895   | 21696533 | T,C | 0.9459 | 0.5325 | -0.492  | 0.378  | 1.695  | 0.1929 |
| CDKAL1 | rs112617138 | 21576898 | A,G | 0.938  | 0.5193 | -0.163  | 0.125  | 1.6947 | 0.193  |
| CDKAL1 | rs115252874 | 21601345 | A,C | 0.9891 | 0.6163 | -8.429  | 6.496  | 1.6835 | 0.1945 |
| CDKAL1 | rs7772692   | 21696544 | A,G | 0.9472 | 0.5318 | -0.493  | 0.381  | 1.6759 | 0.1955 |
| CDKAL1 | rs118074543 | 21601297 | C,G | 0.9891 | 0.6166 | -8.369  | 6.498  | 1.659  | 0.1977 |
| CDKAL1 | rs73737557  | 21570448 | T,C | 0.9333 | 0.4619 | -0.22   | 0.171  | 1.6544 | 0.1984 |
| CDKAL1 | rs146150526 | 21575243 | T,C | 0.9263 | 0.5346 | -0.161  | 0.126  | 1.6452 | 0.1996 |
| CDKAL1 | rs113196987 | 21575419 | A,G | 0.9232 | 0.5162 | -0.16   | 0.125  | 1.6421 | 0.2    |
| CDKAL1 | rs9466128   | 21606679 | G,T | 0.3766 | 0.995  | 0.077   | 0.06   | 1.6365 | 0.2008 |
| CDKAL1 | rs147276150 | 21701200 | A,G | 0.9274 | 0.4176 | 0.22    | 0.172  | 1.633  | 0.2013 |
| CDKAL1 | rs62406884  | 21696308 | C,T | 0.9205 | 0.414  | 0.222   | 0.174  | 1.6243 | 0.2025 |
| CDKAL1 | rs6918842   | 21691009 | C,T | 0.5679 | 0.9924 | -0.085  | 0.068  | 1.587  | 0.2078 |
| CDKAL1 | rs9466141   | 21673993 | C,T | 0.9236 | 0.9976 | -91.389 | 72.691 | 1.5806 | 0.2087 |
| CDKAL1 | rs7738506   | 21702690 | A,T | 0.9888 | 0.6716 | -3.021  | 2.428  | 1.5479 | 0.2134 |
| CDKAL1 | rs1475149   | 21688142 | G,A | 0.5662 | 0.9247 | -0.086  | 0.07   | 1.5278 | 0.2164 |
| CDKAL1 | rs66735249  | 21686666 | D,R | 0.551  | 0.8357 | -0.089  | 0.072  | 1.5243 | 0.217  |
| CDKAL1 | rs116258702 | 21618081 | C,T | 0.9891 | 0.5647 | -8.025  | 6.542  | 1.5048 | 0.2199 |
| CDKAL1 | rs113889001 | 21695381 | A,C | 0.9496 | 0.5091 | -0.536  | 0.44   | 1.482  | 0.2235 |
| CDKAL1 | rs116216476 | 21700308 | T,C | 0.9886 | 0.6467 | -1.981  | 1.634  | 1.4708 | 0.2252 |
| CDKAL1 | rs528217121 | 21702677 | R,D | 0.9888 | 0.6785 | -2.906  | 2.414  | 1.4493 | 0.2286 |
| CDKAL1 | rs34954830  | 21632488 | R,I | 0.9584 | 0.5469 | -4.334  | 3.638  | 1.4196 | 0.2335 |
| CDKAL1 | rs1973986   | 21687571 | A,T | 0.5557 | 0.8895 | -0.083  | 0.071  | 1.3814 | 0.2399 |
| CDKAL1 | rs1555287   | 21686091 | G,A | 0.5629 | 0.8575 | -0.084  | 0.072  | 1.3793 | 0.2402 |
| CDKAL1 | rs530522537 | 21694259 | R,D | 0.9305 | 0.6164 | -0.441  | 0.376  | 1.3757 | 0.2408 |
| CDKAL1 | rs114981716 | 21562453 | G,A | 0.977  | 0.3896 | -0.368  | 0.321  | 1.315  | 0.2515 |
| CDKAL1 | rs2181318   | 21691468 | T,C | 0.549  | 0.9168 | -0.079  | 0.069  | 1.3119 | 0.2521 |
| CDKAL1 | rs141253251 | 21567552 | G,A | 0.9772 | 0.4147 | -0.358  | 0.313  | 1.3098 | 0.2524 |
| CDKAL1 | rs185847252 | 21676018 | G,A | 0.9496 | 0.8487 | -42.054 | 37.345 | 1.2681 | 0.2601 |
| CDKAL1 | rs79337490  | 21695025 | T,C | 0.9508 | 0.5151 | -0.498  | 0.449  | 1.2278 | 0.2678 |
| CDKAL1 | rs79002033  | 21706995 | C,T | 0.9739 | 0.6771 | -2.064  | 1.865  | 1.2246 | 0.2685 |
| CDKAL1 | rs112117324 | 21606452 | C,T | 0.9756 | 0.8592 | -5.177  | 4.684  | 1.2215 | 0.2691 |
| CDKAL1 | rs144178641 | 21622568 | C,T | 0.984  | 0.926  | -20.765 | 18.804 | 1.2195 | 0.2695 |

|        |             |          |     |        |        |         |        |        |        |
|--------|-------------|----------|-----|--------|--------|---------|--------|--------|--------|
| CDKAL1 | rs111405274 | 21694954 | A,G | 0.9508 | 0.5151 | -0.497  | 0.45   | 1.2176 | 0.2698 |
| CDKAL1 | rs4712623   | 21688978 | C,T | 0.638  | 0.848  | 0.077   | 0.07   | 1.1973 | 0.2739 |
| CDKAL1 | rs10080820  | 21655815 | C,G | 0.983  | 0.7561 | -5.366  | 4.906  | 1.1961 | 0.2741 |
| CDKAL1 | rs9366408   | 21742607 | G,A | 0.9822 | 0.9856 | 49.842  | 45.78  | 1.1853 | 0.2763 |
| CDKAL1 | rs61157774  | 21556217 | C,T | 0.9598 | 0.3134 | -0.398  | 0.366  | 1.1797 | 0.2774 |
| CDKAL1 | rs59880840  | 21556245 | G,A | 0.9598 | 0.3138 | -0.397  | 0.366  | 1.1743 | 0.2785 |
| CDKAL1 | rs7744188   | 21694601 | T,C | 0.9149 | 0.6416 | -0.314  | 0.29   | 1.1732 | 0.2787 |
| CDKAL1 | rs7775506   | 21729962 | C,T | 0.4216 | 0.9976 | -0.061  | 0.057  | 1.1561 | 0.2823 |
| CDKAL1 | rs111928481 | 21648542 | T,A | 0.9738 | 0.8848 | -0.245  | 0.229  | 1.1456 | 0.2845 |
| CDKAL1 | rs76475505  | 21611890 | T,G | 0.9837 | 0.9609 | -32.286 | 30.249 | 1.1392 | 0.2858 |
| CDKAL1 | rs9466129   | 21610137 | C,G | 0.9838 | 0.9565 | -32.286 | 30.249 | 1.1392 | 0.2858 |
| CDKAL1 | rs189742413 | 21683505 | C,T | 0.984  | 0.4632 | -0.387  | 0.363  | 1.1386 | 0.2859 |
| CDKAL1 | rs77155105  | 21682861 | C,G | 0.9671 | 0.7117 | -0.405  | 0.384  | 1.1146 | 0.2911 |
| CDKAL1 | rs145648458 | 21636404 | T,C | 0.9762 | 0.7475 | -4.963  | 4.714  | 1.1087 | 0.2924 |
| CDKAL1 | rs77273443  | 21620705 | G,A | 0.984  | 0.938  | -21.526 | 20.471 | 1.1058 | 0.293  |
| CDKAL1 | rs7739186   | 21657833 | T,C | 0.9158 | 0.8085 | -0.137  | 0.131  | 1.1016 | 0.2939 |
| CDKAL1 | rs9348483   | 21687390 | G,T | 0.7953 | 0.87   | 0.078   | 0.075  | 1.0969 | 0.2949 |
| CDKAL1 | rs61197304  | 21570213 | G,A | 0.9581 | 0.4232 | -0.319  | 0.305  | 1.0947 | 0.2954 |
| CDKAL1 | rs12333123  | 21640660 | G,A | 0.9848 | 0.7705 | -6.395  | 6.117  | 1.093  | 0.2958 |
| CDKAL1 | rs12528487  | 21735354 | A,G | 0.8629 | 0.9338 | -0.127  | 0.122  | 1.0914 | 0.2962 |
| CDKAL1 | rs60459153  | 21570941 | G,A | 0.9572 | 0.4198 | -0.317  | 0.304  | 1.0901 | 0.2964 |
| CDKAL1 | rs9460670   | 21731138 | C,A | 0.877  | 0.9736 | -0.126  | 0.121  | 1.0892 | 0.2967 |
| CDKAL1 | rs115900264 | 21738499 | A,G | 0.8705 | 0.965  | -0.126  | 0.121  | 1.0882 | 0.2969 |
| CDKAL1 | rs57690989  | 21652353 | T,G | 0.9629 | 0.903  | -0.2    | 0.192  | 1.0879 | 0.2969 |
| CDKAL1 | rs80230506  | 21655914 | C,A | 0.9607 | 0.7829 | -0.301  | 0.289  | 1.0868 | 0.2972 |
| CDKAL1 | rs75179770  | 21568397 | C,T | 0.9582 | 0.4017 | -0.323  | 0.311  | 1.0788 | 0.299  |
| CDKAL1 | rs78474141  | 21604475 | G,T | 0.9839 | 0.9516 | -66.586 | 64.12  | 1.0784 | 0.2991 |
| CDKAL1 | rs4710982   | 21733835 | G,C | 0.8653 | 0.9343 | -0.125  | 0.121  | 1.0768 | 0.2994 |
| CDKAL1 | rs12525631  | 21730840 | C,T | 0.8794 | 0.9968 | -0.124  | 0.12   | 1.074  | 0.3    |
| CDKAL1 | rs16885189  | 21729682 | G,A | 0.8667 | 0.9973 | -0.124  | 0.12   | 1.074  | 0.3    |
| CDKAL1 | rs4712633   | 21738249 | A,G | 0.8598 | 1      | -0.124  | 0.12   | 1.074  | 0.3    |
| CDKAL1 | rs9466136   | 21653258 | C,T | 0.905  | 0.8569 | -0.118  | 0.114  | 1.0724 | 0.3004 |
| CDKAL1 | rs116300170 | 21663541 | G,A | 0.9641 | 0.8099 | -0.329  | 0.319  | 1.0653 | 0.302  |
| CDKAL1 | rs143796183 | 21587351 | G,A | 0.9851 | 0.3168 | 1.083   | 1.049  | 1.0655 | 0.302  |
| CDKAL1 | rs9460657   | 21660051 | C,T | 0.8938 | 0.8161 | -0.135  | 0.131  | 1.0631 | 0.3025 |
| CDKAL1 | rs80264536  | 21666345 | T,G | 0.9437 | 0.7836 | -0.313  | 0.304  | 1.0592 | 0.3034 |
| CDKAL1 | rs76062205  | 21666427 | C,T | 0.9438 | 0.7852 | -0.312  | 0.304  | 1.0553 | 0.3043 |
| CDKAL1 | rs77354845  | 21621783 | A,G | 0.9841 | 0.9371 | -19.309 | 18.802 | 1.0547 | 0.3044 |
| CDKAL1 | rs116104882 | 21654116 | G,C | 0.9607 | 0.7845 | -0.291  | 0.284  | 1.049  | 0.3057 |
| CDKAL1 | rs78870816  | 21665363 | C,T | 0.9434 | 0.7804 | -0.311  | 0.304  | 1.0448 | 0.3067 |
| CDKAL1 | rs7751397   | 21662535 | C,T | 0.9285 | 0.8402 | -0.135  | 0.132  | 1.0434 | 0.307  |
| CDKAL1 | rs116300465 | 21738509 | T,G | 0.8638 | 0.9326 | -0.118  | 0.116  | 1.0429 | 0.3072 |
| CDKAL1 | rs2876599   | 21714103 | C,G | 0.9889 | 0.7808 | -59.464 | 58.4   | 1.0368 | 0.3086 |
| CDKAL1 | rs73737565  | 21664442 | T,G | 0.9768 | 0.5564 | -13.354 | 13.133 | 1.0339 | 0.3093 |
| CDKAL1 | rs116697959 | 21668594 | A,T | 0.9652 | 0.8312 | -0.326  | 0.321  | 1.0306 | 0.31   |

|        |             |          |     |        |        |         |         |        |        |
|--------|-------------|----------|-----|--------|--------|---------|---------|--------|--------|
| CDKAL1 | rs113989215 | 21665766 | A,C | 0.9131 | 0.855  | -0.119  | 0.117   | 1.03   | 0.3101 |
| CDKAL1 | rs7771671   | 21662524 | T,G | 0.9284 | 0.8382 | -0.134  | 0.132   | 1.0292 | 0.3103 |
| CDKAL1 | rs111412021 | 21606278 | T,C | 0.9882 | 0.8163 | -0.241  | 0.238   | 1.0276 | 0.3107 |
| CDKAL1 | rs112837708 | 21696451 | G,A | 0.9648 | 0.4436 | -0.628  | 0.62    | 1.0277 | 0.3107 |
| CDKAL1 | rs76501983  | 21631411 | G,A | 0.9854 | 0.8228 | -0.232  | 0.229   | 1.0267 | 0.3109 |
| CDKAL1 | rs74492370  | 21679606 | G,A | 0.9678 | 0.8228 | -0.325  | 0.321   | 1.0249 | 0.3114 |
| CDKAL1 | rs78971333  | 21679601 | C,T | 0.9678 | 0.8229 | -0.325  | 0.321   | 1.0249 | 0.3114 |
| CDKAL1 | rs138585583 | 21678890 | R,D | 0.8749 | 0.9014 | -0.118  | 0.117   | 1.0222 | 0.312  |
| CDKAL1 | rs79169915  | 21607457 | G,A | 0.9882 | 0.848  | -0.241  | 0.239   | 1.0203 | 0.3124 |
| CDKAL1 | rs76944255  | 21582643 | G,A | 0.981  | 0.4687 | -0.241  | 0.238   | 1.0192 | 0.3127 |
| CDKAL1 | rs75157802  | 21678178 | A,G | 0.9675 | 0.834  | -0.316  | 0.313   | 1.0169 | 0.3133 |
| CDKAL1 | rs76857610  | 21685543 | G,T | 0.9888 | 0.4734 | -1.103  | 1.094   | 1.0169 | 0.3133 |
| CDKAL1 | rs6456440   | 21658236 | C,A | 0.9344 | 0.7776 | -0.222  | 0.22    | 1.0164 | 0.3134 |
| CDKAL1 | rs546083928 | 21596246 | R,I | 0.9877 | 0.6818 | -0.24   | 0.238   | 1.0158 | 0.3135 |
| CDKAL1 | rs76934110  | 21669629 | G,A | 0.9626 | 0.7982 | -0.322  | 0.321   | 1.0113 | 0.3146 |
| CDKAL1 | rs190176895 | 21629550 | C,A | 0.9877 | 0.7487 | -0.239  | 0.238   | 1.0095 | 0.315  |
| CDKAL1 | rs113842280 | 21611571 | T,G | 0.9848 | 0.967  | -0.228  | 0.228   | 1.0076 | 0.3155 |
| CDKAL1 | rs80061387  | 21579793 | T,C | 0.9808 | 0.4585 | -0.24   | 0.239   | 1.007  | 0.3156 |
| CDKAL1 | rs112102336 | 21677692 | G,T | 0.9639 | 0.7866 | -0.311  | 0.31    | 1.0068 | 0.3157 |
| CDKAL1 | rs73737568  | 21667546 | A,G | 0.9719 | 0.8789 | -0.226  | 0.225   | 1.0068 | 0.3157 |
| CDKAL1 | rs112650104 | 21611568 | C,G | 0.9871 | 0.889  | -0.238  | 0.237   | 1.0049 | 0.3161 |
| CDKAL1 | rs112538002 | 21611751 | T,C | 0.9848 | 0.97   | -0.228  | 0.228   | 1.0046 | 0.3162 |
| CDKAL1 | rs7762989   | 21624153 | C,T | 0.9883 | 0.8214 | -0.239  | 0.238   | 1.0045 | 0.3162 |
| CDKAL1 | rs6941897   | 21671979 | C,A | 0.9897 | 0.6097 | -0.252  | 0.252   | 1.0042 | 0.3163 |
| CDKAL1 | rs111411936 | 21626246 | G,A | 0.9877 | 0.7672 | -0.238  | 0.238   | 1.0036 | 0.3164 |
| CDKAL1 | rs73374488  | 21666188 | G,A | 0.9707 | 0.8902 | -0.226  | 0.225   | 1.0037 | 0.3164 |
| CDKAL1 | rs75509154  | 21670162 | A,G | 0.9656 | 0.8408 | -0.321  | 0.321   | 1.0031 | 0.3166 |
| CDKAL1 | rs111228858 | 21612309 | G,A | 0.9872 | 0.8945 | -0.237  | 0.237   | 1.0018 | 0.3169 |
| CDKAL1 | rs6934807   | 21653677 | A,G | 0.9709 | 0.9814 | -0.228  | 0.227   | 1.0017 | 0.3169 |
| CDKAL1 | rs78923341  | 21612472 | A,C | 0.9872 | 0.895  | -0.237  | 0.237   | 1.0018 | 0.3169 |
| CDKAL1 | rs6933506   | 21673857 | T,C | 0.9717 | 0.871  | -0.223  | 0.223   | 1.0013 | 0.317  |
| CDKAL1 | rs117971178 | 21674146 | C,T | 0.9852 | 0.5427 | -227.51 | 227.477 | 1.0003 | 0.3172 |
| CDKAL1 | rs145952396 | 21677173 | C,T | 0.9854 | 0.5637 | -56.876 | 56.869  | 1.0003 | 0.3172 |
| CDKAL1 | rs147045541 | 21675767 | C,T | 0.9834 | 0.576  | -227.51 | 227.477 | 1.0003 | 0.3172 |
| CDKAL1 | rs9295516   | 21673560 | C,T | 0.9483 | 0.8605 | -75.835 | 75.826  | 1.0003 | 0.3172 |
| CDKAL1 | rs9466126   | 21601762 | A,C | 0.9836 | 0.9467 | -227.51 | 227.477 | 1.0003 | 0.3172 |
| CDKAL1 | rs9466127   | 21602745 | G,A | 0.9739 | 0.9906 | -227.51 | 227.477 | 1.0003 | 0.3172 |
| CDKAL1 | rs142641808 | 21677158 | C,T | 0.9656 | 0.7625 | -0.312  | 0.312   | 0.9987 | 0.3176 |
| CDKAL1 | rs113455272 | 21616778 | T,C | 0.9824 | 0.9392 | -0.227  | 0.228   | 0.9981 | 0.3178 |
| CDKAL1 | rs59187080  | 21668625 | G,A | 0.966  | 0.7875 | -0.188  | 0.188   | 0.9978 | 0.3179 |
| CDKAL1 | rs111887738 | 21616944 | T,C | 0.9828 | 0.9369 | -0.227  | 0.228   | 0.9973 | 0.318  |
| CDKAL1 | rs147488932 | 21672276 | G,A | 0.9657 | 0.8442 | -0.32   | 0.321   | 0.997  | 0.318  |
| CDKAL1 | rs112553613 | 21616239 | A,G | 0.9848 | 0.9676 | -0.227  | 0.228   | 0.9913 | 0.3194 |
| CDKAL1 | rs10557323  | 21615430 | R,D | 0.9849 | 0.974  | -0.227  | 0.228   | 0.9911 | 0.3195 |
| CDKAL1 | rs77222012  | 21614945 | G,A | 0.9849 | 0.9755 | -0.226  | 0.228   | 0.9878 | 0.3203 |

|        |             |          |     |        |        |         |         |        |        |
|--------|-------------|----------|-----|--------|--------|---------|---------|--------|--------|
| CDKAL1 | rs71657670  | 21613526 | R,D | 0.9864 | 0.77   | -0.236  | 0.238   | 0.9862 | 0.3207 |
| CDKAL1 | rs185494084 | 21636537 | T,C | 0.9884 | 0.4475 | -0.321  | 0.324   | 0.9843 | 0.3211 |
| CDKAL1 | rs6935968   | 21613156 | G,A | 0.9849 | 0.9776 | -0.226  | 0.228   | 0.9844 | 0.3211 |
| CDKAL1 | rs75127321  | 21613946 | G,A | 0.9849 | 0.9767 | -0.226  | 0.228   | 0.9844 | 0.3211 |
| CDKAL1 | rs543173991 | 21629474 | T,A | 0.9884 | 0.7664 | -0.259  | 0.262   | 0.9786 | 0.3225 |
| CDKAL1 | rs114455294 | 21693186 | A,T | 0.9731 | 0.5546 | -0.432  | 0.437   | 0.9762 | 0.3231 |
| CDKAL1 | rs12374633  | 21654974 | G,A | 0.9698 | 0.9337 | -0.224  | 0.228   | 0.9676 | 0.3253 |
| CDKAL1 | rs145545902 | 21735584 | D,R | 0.6454 | 0.9341 | -0.072  | 0.073   | 0.9585 | 0.3276 |
| CDKAL1 | rs60336041  | 21714991 | A,C | 0.9818 | 0.9007 | -32.268 | 33.205  | 0.9443 | 0.3312 |
| CDKAL1 | rs7740486   | 21714797 | A,G | 0.9818 | 0.8978 | -32.268 | 33.205  | 0.9443 | 0.3312 |
| CDKAL1 | rs549313068 | 21638634 | R,D | 0.9854 | 0.7268 | -0.237  | 0.245   | 0.9381 | 0.3328 |
| CDKAL1 | rs114977922 | 21638119 | C,G | 0.9762 | 0.7437 | -4.252  | 4.4     | 0.9339 | 0.3339 |
| CDKAL1 | rs113815998 | 21709365 | G,T | 0.9608 | 0.7324 | -0.257  | 0.266   | 0.9298 | 0.3349 |
| CDKAL1 | rs139581361 | 21722128 | G,A | 0.9879 | 0.8119 | -13.724 | 14.24   | 0.9288 | 0.3352 |
| CDKAL1 | rs9358442   | 21573637 | G,A | 0.7034 | 0.4581 | -0.085  | 0.088   | 0.9232 | 0.3366 |
| CDKAL1 | rs149385127 | 21642947 | G,A | 0.9849 | 0.723  | -0.234  | 0.244   | 0.9183 | 0.3379 |
| CDKAL1 | rs78378200  | 21647275 | T,C | 0.985  | 0.7319 | -0.234  | 0.245   | 0.914  | 0.3391 |
| CDKAL1 | rs79853707  | 21699451 | C,T | 0.986  | 0.5502 | -0.399  | 0.417   | 0.9131 | 0.3393 |
| CDKAL1 | rs113183700 | 21702524 | A,G | 0.9869 | 0.5842 | -0.34   | 0.357   | 0.9066 | 0.341  |
| CDKAL1 | rs111374956 | 21699545 | G,C | 0.9871 | 0.5681 | -0.395  | 0.415   | 0.9063 | 0.3411 |
| CDKAL1 | rs143636013 | 21649787 | G,C | 0.9413 | 0.7828 | -0.219  | 0.23    | 0.9054 | 0.3413 |
| CDKAL1 | rs111928162 | 21706372 | T,C | 0.9868 | 0.6035 | -0.299  | 0.315   | 0.9021 | 0.3422 |
| CDKAL1 | rs150235785 | 21638293 | G,A | 0.9849 | 0.7598 | -6.89   | 7.26    | 0.9007 | 0.3426 |
| CDKAL1 | rs11966675  | 21640125 | G,A | 0.9761 | 0.7522 | -3.633  | 3.832   | 0.8986 | 0.3432 |
| CDKAL1 | rs74323084  | 21645152 | C,G | 0.9857 | 0.7691 | -0.23   | 0.244   | 0.8845 | 0.347  |
| CDKAL1 | rs148775927 | 21677832 | C,G | 0.9884 | 0.5129 | -0.313  | 0.333   | 0.883  | 0.3474 |
| CDKAL1 | rs375807437 | 21686609 | R,D | 0.5634 | 0.7421 | -0.07   | 0.074   | 0.8741 | 0.3498 |
| CDKAL1 | rs141765572 | 21679089 | G,T | 0.9877 | 0.5484 | -0.321  | 0.343   | 0.8735 | 0.35   |
| CDKAL1 | rs7753199   | 21717706 | G,A | 0.9819 | 0.9391 | -106.23 | 113.739 | 0.8723 | 0.3503 |
| CDKAL1 | rs7757232   | 21717818 | G,A | 0.9819 | 0.9404 | -106.23 | 113.739 | 0.8723 | 0.3503 |
| CDKAL1 | rs7757467   | 21718123 | C,T | 0.9813 | 0.9676 | -212.46 | 227.477 | 0.8723 | 0.3503 |
| CDKAL1 | rs11753001  | 21726506 | T,C | 0.9147 | 0.5112 | 0.137   | 0.147   | 0.8716 | 0.3505 |
| CDKAL1 | rs78937245  | 21738761 | C,T | 0.9864 | 0.6447 | -0.257  | 0.276   | 0.8705 | 0.3508 |
| CDKAL1 | rs182063949 | 21738643 | T,A | 0.9864 | 0.6453 | -0.257  | 0.276   | 0.87   | 0.351  |
| CDKAL1 | rs77258728  | 21734254 | G,A | 0.9872 | 0.709  | -0.251  | 0.27    | 0.869  | 0.3512 |
| CDKAL1 | rs147596047 | 21733524 | R,D | 0.9872 | 0.709  | -0.251  | 0.269   | 0.8671 | 0.3517 |
| CDKAL1 | rs149746556 | 21731479 | R,D | 0.9872 | 0.7098 | -0.25   | 0.268   | 0.8665 | 0.3519 |
| CDKAL1 | rs75935729  | 21733252 | C,A | 0.9872 | 0.709  | -0.251  | 0.269   | 0.8665 | 0.3519 |
| CDKAL1 | rs78584490  | 21732145 | C,T | 0.9872 | 0.7096 | -0.249  | 0.268   | 0.8645 | 0.3525 |
| CDKAL1 | rs138882930 | 21638300 | A,G | 0.9761 | 0.7432 | -4.043  | 4.35    | 0.8638 | 0.3527 |
| CDKAL1 | rs78098947  | 21713740 | C,T | 0.989  | 0.7788 | -64.733 | 69.688  | 0.8629 | 0.3529 |
| CDKAL1 | rs78686872  | 21566786 | T,C | 0.9087 | 0.4686 | -0.131  | 0.141   | 0.8607 | 0.3535 |
| CDKAL1 | rs12333154  | 21640855 | G,A | 0.976  | 0.751  | -3.411  | 3.677   | 0.8605 | 0.3536 |
| CDKAL1 | rs78225455  | 21566785 | T,A | 0.9087 | 0.4686 | -0.131  | 0.141   | 0.8598 | 0.3538 |
| CDKAL1 | rs115733488 | 21695961 | T,C | 0.9892 | 0.5305 | -0.818  | 0.884   | 0.8546 | 0.3552 |

|        |             |          |     |        |        |         |        |        |        |
|--------|-------------|----------|-----|--------|--------|---------|--------|--------|--------|
| CDKAL1 | rs56175726  | 21566498 | G,A | 0.9534 | 0.3503 | -0.289  | 0.313  | 0.8517 | 0.3561 |
| CDKAL1 | rs145907846 | 21729085 | G,A | 0.9868 | 0.8724 | -19.014 | 20.68  | 0.8454 | 0.3579 |
| CDKAL1 | rs147273446 | 21638982 | C,G | 0.9761 | 0.7533 | -3.768  | 4.116  | 0.8379 | 0.36   |
| CDKAL1 | rs148317817 | 21638986 | G,A | 0.9761 | 0.7532 | -3.768  | 4.116  | 0.8379 | 0.36   |
| CDKAL1 | rs571788443 | 21558875 | R,D | 0.8581 | 0.3304 | -0.121  | 0.132  | 0.8373 | 0.3602 |
| CDKAL1 | rs77991965  | 21694060 | G,A | 0.9358 | 0.6372 | -0.333  | 0.364  | 0.8353 | 0.3607 |
| CDKAL1 | rs13220312  | 21671856 | A,G | 0.9734 | 0.7398 | 28.704  | 31.535 | 0.8285 | 0.3627 |
| CDKAL1 | rs547687648 | 21729656 | R,I | 0.7892 | 0.8727 | 0.063   | 0.069  | 0.8286 | 0.3627 |
| CDKAL1 | rs143393812 | 21633911 | C,T | 0.9816 | 0.5752 | -3.16   | 3.48   | 0.8249 | 0.3638 |
| CDKAL1 | rs113932195 | 21562740 | T,C | 0.9088 | 0.469  | -0.127  | 0.141  | 0.8171 | 0.366  |
| CDKAL1 | rs9295515   | 21641667 | C,T | 0.976  | 0.7495 | -3.165  | 3.509  | 0.8138 | 0.367  |
| CDKAL1 | rs111479343 | 21561070 | G,T | 0.9092 | 0.4694 | -0.126  | 0.14   | 0.8102 | 0.3681 |
| CDKAL1 | rs78714768  | 21631590 | C,T | 0.9845 | 0.8158 | -24.284 | 27.089 | 0.8036 | 0.37   |
| CDKAL1 | rs7738599   | 21631790 | A,G | 0.9365 | 0.4203 | -0.208  | 0.233  | 0.791  | 0.3738 |
| CDKAL1 | rs10155732  | 21639540 | C,T | 0.9761 | 0.7536 | -3.538  | 3.982  | 0.7894 | 0.3743 |
| CDKAL1 | rs9460658   | 21684193 | C,T | 0.9792 | 0.347  | -0.466  | 0.525  | 0.7864 | 0.3752 |
| CDKAL1 | rs10155733  | 21639594 | C,T | 0.9761 | 0.7534 | -3.518  | 3.978  | 0.7821 | 0.3765 |
| CDKAL1 | rs11961107  | 21642740 | G,A | 0.9758 | 0.7454 | -2.689  | 3.047  | 0.7792 | 0.3774 |
| CDKAL1 | rs527350470 | 21640569 | R,D | 0.9745 | 0.7043 | -3.473  | 3.942  | 0.7762 | 0.3783 |
| CDKAL1 | rs9358450   | 21740882 | A,G | 0.746  | 0.858  | 0.053   | 0.06   | 0.7725 | 0.3795 |
| CDKAL1 | rs16885205  | 21743291 | T,C | 0.8644 | 0.5834 | 0.111   | 0.127  | 0.7677 | 0.3809 |
| CDKAL1 | rs58919806  | 21570038 | G,A | 0.8921 | 0.397  | -0.126  | 0.145  | 0.7616 | 0.3828 |
| CDKAL1 | rs12332790  | 21642505 | C,T | 0.9758 | 0.7456 | -2.675  | 3.073  | 0.7576 | 0.3841 |
| CDKAL1 | rs9466143   | 21676688 | A,T | 0.943  | 0.8542 | -15.323 | 17.689 | 0.7504 | 0.3863 |
| CDKAL1 | rs1972212   | 21743761 | C,T | 0.8703 | 0.5142 | 0.117   | 0.135  | 0.7488 | 0.3868 |
| CDKAL1 | rs150184400 | 21642793 | T,C | 0.9758 | 0.7454 | -2.606  | 3.023  | 0.7435 | 0.3885 |
| CDKAL1 | rs10080752  | 21655608 | C,G | 0.9819 | 0.7225 | -3.375  | 3.939  | 0.7341 | 0.3916 |
| CDKAL1 | rs1555529   | 21691704 | A,G | 0.7822 | 0.9942 | 0.062   | 0.073  | 0.7214 | 0.3957 |
| CDKAL1 | rs113064891 | 21606092 | R,I | 0.9811 | 0.9369 | -30.906 | 36.669 | 0.7103 | 0.3993 |
| CDKAL1 | rs548416728 | 21647978 | R,D | 0.9747 | 0.6618 | -1.834  | 2.176  | 0.7101 | 0.3994 |
| CDKAL1 | rs9466133   | 21643948 | C,T | 0.9757 | 0.7442 | -2.373  | 2.853  | 0.6918 | 0.4055 |
| CDKAL1 | rs113975012 | 21712110 | A,T | 0.9843 | 0.5172 | -1.413  | 1.714  | 0.6794 | 0.4098 |
| CDKAL1 | rs9466169   | 21746181 | A,G | 0.8659 | 0.4166 | 0.124   | 0.151  | 0.6793 | 0.4098 |
| CDKAL1 | rs9460656   | 21643907 | A,G | 0.9758 | 0.7442 | -2.358  | 2.876  | 0.6723 | 0.4123 |
| CDKAL1 | rs9358441   | 21565339 | T,C | 0.7025 | 0.3571 | -0.086  | 0.105  | 0.6618 | 0.4159 |
| CDKAL1 | rs2251647   | 21677746 | C,A | 0.9512 | 0.9786 | -0.09   | 0.111  | 0.6607 | 0.4163 |
| CDKAL1 | rs139032454 | 21644326 | A,C | 0.9757 | 0.7441 | -2.288  | 2.816  | 0.6603 | 0.4164 |
| CDKAL1 | rs116016141 | 21687920 | C,T | 0.988  | 0.5009 | -7.673  | 9.465  | 0.6571 | 0.4176 |
| CDKAL1 | rs142355149 | 21692662 | A,C | 0.9804 | 0.36   | 0.964   | 1.189  | 0.6565 | 0.4178 |
| CDKAL1 | rs56004640  | 21716262 | A,G | 0.8113 | 0.9096 | 0.069   | 0.085  | 0.6542 | 0.4186 |
| CDKAL1 | rs111442391 | 21730723 | C,T | 0.9726 | 0.3086 | -0.212  | 0.266  | 0.6358 | 0.4252 |
| CDKAL1 | rs117804382 | 21656810 | C,T | 0.9855 | 0.5625 | -6.204  | 7.821  | 0.6293 | 0.4276 |
| CDKAL1 | rs7746292   | 21685907 | A,G | 0.9762 | 0.4817 | -0.77   | 0.971  | 0.6289 | 0.4278 |
| CDKAL1 | rs571632729 | 21726382 | R,I | 0.896  | 0.3926 | -0.17   | 0.217  | 0.6192 | 0.4314 |
| CDKAL1 | rs114613272 | 21721382 | C,T | 0.984  | 0.8169 | -7.465  | 9.511  | 0.616  | 0.4325 |

|        |             |          |     |        |        |         |        |        |        |
|--------|-------------|----------|-----|--------|--------|---------|--------|--------|--------|
| CDKAL1 | rs9466158   | 21717309 | T,C | 0.7892 | 0.921  | 0.066   | 0.084  | 0.6115 | 0.4342 |
| CDKAL1 | rs4710983   | 21734202 | C,T | 0.767  | 0.9462 | 0.044   | 0.057  | 0.5854 | 0.4442 |
| CDKAL1 | rs7746424   | 21685920 | C,T | 0.9762 | 0.4981 | -0.738  | 0.967  | 0.5833 | 0.445  |
| CDKAL1 | rs7746432   | 21685933 | C,T | 0.9755 | 0.5041 | -0.738  | 0.967  | 0.5833 | 0.445  |
| CDKAL1 | rs150997476 | 21663402 | A,T | 0.9893 | 0.6383 | -0.207  | 0.275  | 0.5673 | 0.4513 |
| CDKAL1 | rs7760462   | 21730877 | G,C | 0.4165 | 0.9846 | -0.044  | 0.058  | 0.565  | 0.4522 |
| CDKAL1 | rs142460847 | 21687632 | A,G | 0.9751 | 0.5044 | -0.719  | 0.959  | 0.5622 | 0.4534 |
| CDKAL1 | rs7746895   | 21686168 | C,A | 0.9752 | 0.5028 | -0.719  | 0.96   | 0.5607 | 0.454  |
| CDKAL1 | rs115180462 | 21686653 | G,C | 0.9752 | 0.5032 | -0.713  | 0.959  | 0.553  | 0.4571 |
| CDKAL1 | rs7747757   | 21686714 | C,T | 0.9752 | 0.5035 | -0.713  | 0.959  | 0.553  | 0.4571 |
| CDKAL1 | rs34810044  | 21718703 | R,D | 0.7721 | 0.9072 | 0.062   | 0.084  | 0.5491 | 0.4587 |
| CDKAL1 | rs148767257 | 21687606 | C,T | 0.9752 | 0.5064 | -0.708  | 0.958  | 0.5464 | 0.4598 |
| CDKAL1 | rs78278852  | 21688571 | G,A | 0.9753 | 0.5113 | -0.704  | 0.957  | 0.5409 | 0.4621 |
| CDKAL1 | rs140066406 | 21728813 | R,I | 0.8701 | 0.9744 | -0.1    | 0.136  | 0.5406 | 0.4622 |
| CDKAL1 | rs1740849   | 21619809 | G,A | 0.3637 | 0.9622 | 0.041   | 0.055  | 0.5399 | 0.4625 |
| CDKAL1 | rs9350368   | 21562144 | A,G | 0.6823 | 0.3726 | -0.074  | 0.101  | 0.5369 | 0.4637 |
| CDKAL1 | rs79684204  | 21687368 | A,C | 0.9748 | 0.5098 | -0.701  | 0.959  | 0.5341 | 0.4649 |
| CDKAL1 | rs11968460  | 21718604 | G,A | 0.8056 | 0.9024 | 0.061   | 0.084  | 0.5331 | 0.4653 |
| CDKAL1 | rs144306476 | 21721932 | T,G | 0.989  | 0.6617 | -3.368  | 4.618  | 0.532  | 0.4658 |
| CDKAL1 | rs16885175  | 21726770 | A,G | 0.8585 | 0.8892 | -0.1    | 0.138  | 0.5272 | 0.4678 |
| CDKAL1 | rs9368332   | 21731094 | G,A | 0.4156 | 0.9974 | -0.042  | 0.058  | 0.5239 | 0.4692 |
| CDKAL1 | rs9466160   | 21722771 | A,G | 0.9736 | 0.8106 | -2.534  | 3.523  | 0.5172 | 0.472  |
| CDKAL1 | rs9460671   | 21731289 | G,C | 0.41   | 0.9868 | -0.042  | 0.058  | 0.5138 | 0.4735 |
| CDKAL1 | rs116598598 | 21654884 | A,T | 0.983  | 0.5411 | -3.452  | 4.865  | 0.5034 | 0.478  |
| CDKAL1 | rs116779637 | 21718919 | G,T | 0.9886 | 0.7935 | 20.17   | 28.435 | 0.5031 | 0.4781 |
| CDKAL1 | rs6925407   | 21724100 | G,C | 0.9884 | 0.9399 | 1.169   | 1.648  | 0.5031 | 0.4781 |
| CDKAL1 | rs4712632   | 21732137 | G,A | 0.4138 | 0.9644 | -0.041  | 0.058  | 0.4893 | 0.4842 |
| CDKAL1 | rs9366406   | 21617668 | T,A | 0.7397 | 0.9296 | -0.043  | 0.062  | 0.4871 | 0.4852 |
| CDKAL1 | rs530398575 | 21733586 | R,I | 0.8629 | 0.4934 | 0.071   | 0.102  | 0.4848 | 0.4863 |
| CDKAL1 | rs4710981   | 21732702 | G,C | 0.4166 | 0.9635 | -0.04   | 0.058  | 0.475  | 0.4907 |
| CDKAL1 | rs1617781   | 21608766 | A,G | 0.693  | 0.9819 | -0.043  | 0.063  | 0.4692 | 0.4934 |
| CDKAL1 | rs146017644 | 21640727 | C,T | 0.9833 | 0.5529 | -2.049  | 3.023  | 0.4597 | 0.4978 |
| CDKAL1 | rs6456437   | 21615443 | T,C | 0.7388 | 0.9506 | -0.042  | 0.062  | 0.4547 | 0.5001 |
| CDKAL1 | rs11361021  | 21608909 | D,R | 0.6928 | 0.9683 | -0.042  | 0.063  | 0.4532 | 0.5008 |
| CDKAL1 | rs1989470   | 21715067 | T,A | 0.5732 | 0.9562 | -0.046  | 0.068  | 0.4505 | 0.5021 |
| CDKAL1 | rs78345714  | 21734098 | T,C | 0.9849 | 0.6839 | -0.156  | 0.233  | 0.4501 | 0.5023 |
| CDKAL1 | rs1622043   | 21609285 | A,G | 0.6925 | 0.9814 | -0.042  | 0.063  | 0.4465 | 0.504  |
| CDKAL1 | rs112395953 | 21727909 | A,C | 0.885  | 0.9741 | -0.09   | 0.137  | 0.4363 | 0.5089 |
| CDKAL1 | rs9460650   | 21615371 | T,C | 0.9841 | 0.9776 | -17.984 | 27.283 | 0.4345 | 0.5098 |
| CDKAL1 | rs1744855   | 21623715 | G,A | 0.3803 | 0.9708 | 0.036   | 0.054  | 0.4328 | 0.5106 |
| CDKAL1 | rs73376077  | 21720504 | C,T | 0.7969 | 0.9025 | 0.054   | 0.082  | 0.4227 | 0.5156 |
| CDKAL1 | rs201995762 | 21706002 | R,I | 0.9873 | 0.4393 | -2.779  | 4.294  | 0.4188 | 0.5175 |
| CDKAL1 | rs57792403  | 21738640 | R,D | 0.4364 | 0.9838 | -0.037  | 0.057  | 0.4137 | 0.5201 |
| CDKAL1 | rs840982    | 21740321 | T,C | 0.4378 | 0.9967 | -0.037  | 0.057  | 0.413  | 0.5204 |
| CDKAL1 | rs840981    | 21740238 | G,A | 0.4381 | 1      | -0.036  | 0.057  | 0.4086 | 0.5227 |

|        |             |          |     |        |        |         |        |        |        |
|--------|-------------|----------|-----|--------|--------|---------|--------|--------|--------|
| CDKAL1 | rs7739775   | 21727465 | C,T | 0.87   | 0.9769 | -0.086  | 0.136  | 0.4026 | 0.5257 |
| CDKAL1 | rs73392015  | 21591766 | C,T | 0.9671 | 0.4088 | 0.824   | 1.312  | 0.3939 | 0.5303 |
| CDKAL1 | rs9466159   | 21721313 | A,G | 0.8227 | 0.9323 | 0.052   | 0.082  | 0.3938 | 0.5303 |
| CDKAL1 | rs183503583 | 21638847 | G,A | 0.9885 | 0.5492 | -2.518  | 4.042  | 0.3879 | 0.5334 |
| CDKAL1 | rs1744887   | 21674378 | G,T | 0.9679 | 0.3275 | 0.276   | 0.447  | 0.3812 | 0.537  |
| CDKAL1 | rs7772335   | 21696185 | C,T | 0.8913 | 0.4593 | -0.112  | 0.182  | 0.3782 | 0.5386 |
| CDKAL1 | rs71563995  | 21676342 | A,G | 0.9697 | 0.7188 | -26.366 | 43.203 | 0.3724 | 0.5417 |
| CDKAL1 | rs150435139 | 21707497 | A,G | 0.9874 | 0.4469 | -2.569  | 4.225  | 0.3697 | 0.5431 |
| CDKAL1 | rs9368333   | 21743631 | A,C | 0.9748 | 0.5254 | 9.281   | 15.355 | 0.3654 | 0.5455 |
| CDKAL1 | rs56050802  | 21555539 | C,T | 0.8664 | 0.6128 | -0.058  | 0.096  | 0.3647 | 0.5459 |
| CDKAL1 | rs116187696 | 21639646 | G,A | 0.9868 | 0.5351 | -2.142  | 3.581  | 0.3577 | 0.5498 |
| CDKAL1 | rs80035391  | 21685357 | G,A | 0.8973 | 0.5163 | 0.103   | 0.173  | 0.3529 | 0.5525 |
| CDKAL1 | rs1620996   | 21602552 | C,T | 0.8959 | 0.8139 | -0.068  | 0.114  | 0.3524 | 0.5528 |
| CDKAL1 | rs61661762  | 21588463 | A,G | 0.9883 | 0.3149 | -0.184  | 0.312  | 0.3486 | 0.5549 |
| CDKAL1 | rs1740830   | 21648615 | C,T | 0.867  | 0.7367 | 0.064   | 0.109  | 0.3478 | 0.5554 |
| CDKAL1 | rs570404489 | 21689796 | R,D | 0.7798 | 0.3015 | 0.105   | 0.18   | 0.3396 | 0.56   |
| CDKAL1 | rs78825652  | 21609539 | I,R | 0.6732 | 0.9671 | -0.036  | 0.063  | 0.3385 | 0.5607 |
| CDKAL1 | rs4712631   | 21710896 | C,T | 0.586  | 0.9993 | -0.039  | 0.067  | 0.3363 | 0.562  |
| CDKAL1 | rs9466156   | 21711491 | C,T | 0.5874 | 0.9998 | -0.039  | 0.067  | 0.3363 | 0.562  |
| CDKAL1 | rs61215435  | 21721256 | C,T | 0.9893 | 0.7083 | 4.883   | 8.429  | 0.3356 | 0.5624 |
| CDKAL1 | rs1740852   | 21608979 | T,C | 0.895  | 0.9932 | -0.059  | 0.102  | 0.3332 | 0.5638 |
| CDKAL1 | rs1744856   | 21625895 | G,A | 0.6341 | 0.4717 | 0.048   | 0.084  | 0.3255 | 0.5683 |
| CDKAL1 | rs58572340  | 21555505 | T,A | 0.8729 | 0.5846 | -0.06   | 0.106  | 0.3226 | 0.5701 |
| CDKAL1 | rs7759991   | 21609547 | C,T | 0.6977 | 0.9669 | -0.035  | 0.063  | 0.3215 | 0.5707 |
| CDKAL1 | rs1744848   | 21609563 | C,T | 0.6977 | 0.9669 | -0.035  | 0.063  | 0.3186 | 0.5724 |
| CDKAL1 | rs149768565 | 21719941 | R,D | 0.9754 | 0.6872 | -2.872  | 5.115  | 0.3152 | 0.5745 |
| CDKAL1 | rs78265086  | 21720541 | T,C | 0.9826 | 0.8636 | 7.469   | 13.391 | 0.3111 | 0.577  |
| CDKAL1 | rs1740828   | 21649085 | A,G | 0.5436 | 0.4642 | 0.05    | 0.091  | 0.3082 | 0.5788 |
| CDKAL1 | rs111404042 | 21565201 | G,A | 0.9548 | 0.5207 | -0.094  | 0.173  | 0.2928 | 0.5884 |
| CDKAL1 | rs4712620   | 21554898 | A,C | 0.6509 | 0.3847 | -0.048  | 0.09   | 0.2888 | 0.591  |
| CDKAL1 | rs561391795 | 21725044 | R,D | 0.9346 | 0.4431 | -0.164  | 0.309  | 0.283  | 0.5947 |
| CDKAL1 | rs9466140   | 21673293 | A,G | 0.9286 | 0.9271 | 13.445  | 25.345 | 0.2814 | 0.5958 |
| CDKAL1 | rs79883278  | 21720741 | C,T | 0.9819 | 0.8353 | 5.194   | 9.889  | 0.2759 | 0.5994 |
| CDKAL1 | rs7759495   | 21706044 | G,A | 0.6142 | 0.9046 | -0.037  | 0.072  | 0.2651 | 0.6066 |
| CDKAL1 | rs545611803 | 21688770 | R,I | 0.8158 | 0.533  | 0.065   | 0.126  | 0.2631 | 0.608  |
| CDKAL1 | rs1973987   | 21687659 | G,T | 0.8711 | 0.6956 | 0.074   | 0.145  | 0.2608 | 0.6096 |
| CDKAL1 | rs1322883   | 21720796 | A,G | 0.5867 | 0.9164 | -0.037  | 0.075  | 0.2481 | 0.6184 |
| CDKAL1 | rs75629001  | 21689221 | C,T | 0.8716 | 0.708  | 0.071   | 0.144  | 0.2458 | 0.6201 |
| CDKAL1 | rs150555050 | 21561633 | G,A | 0.9894 | 0.5125 | -14.64  | 29.676 | 0.2434 | 0.6218 |
| CDKAL1 | rs76257188  | 21688091 | T,G | 0.8712 | 0.7018 | 0.071   | 0.145  | 0.2425 | 0.6224 |
| CDKAL1 | rs77992585  | 21687331 | G,A | 0.8724 | 0.6862 | 0.072   | 0.146  | 0.2413 | 0.6233 |
| CDKAL1 | rs200447839 | 21689115 | R,D | 0.8701 | 0.7188 | 0.07    | 0.142  | 0.2409 | 0.6235 |
| CDKAL1 | rs1321253   | 21689813 | T,A | 0.8723 | 0.7273 | 0.069   | 0.142  | 0.2354 | 0.6276 |
| CDKAL1 | rs12183824  | 21726382 | G,A | 0.8184 | 0.3562 | -0.096  | 0.199  | 0.2343 | 0.6283 |
| CDKAL1 | rs60048426  | 21556513 | G,A | 0.947  | 0.5576 | -0.082  | 0.17   | 0.2317 | 0.6303 |



|        |             |          |     |        |        |         |        |        |        |
|--------|-------------|----------|-----|--------|--------|---------|--------|--------|--------|
| CDKAL1 | rs1744861   | 21627986 | A,T | 0.3793 | 0.9676 | 0.026   | 0.054  | 0.2314 | 0.6305 |
| CDKAL1 | rs12524788  | 21690518 | T,G | 0.8725 | 0.7375 | 0.067   | 0.141  | 0.2301 | 0.6314 |
| CDKAL1 | rs6924745   | 21693837 | C,T | 0.8421 | 0.8514 | 0.046   | 0.097  | 0.2279 | 0.633  |
| CDKAL1 | rs75122426  | 21580566 | T,C | 0.985  | 0.6235 | -25.32  | 55.397 | 0.2089 | 0.6476 |
| CDKAL1 | rs6933476   | 21720156 | G,A | 0.9819 | 0.8936 | 7.369   | 16.168 | 0.2078 | 0.6485 |
| CDKAL1 | rs1744876   | 21651003 | T,C | 0.8157 | 0.9901 | 0.03    | 0.067  | 0.1948 | 0.6589 |
| CDKAL1 | rs9350367   | 21555608 | C,T | 0.6563 | 0.3839 | -0.041  | 0.093  | 0.1927 | 0.6607 |
| CDKAL1 | rs11438117  | 21660100 | R,I | 0.4211 | 0.4868 | 0.031   | 0.072  | 0.189  | 0.6637 |
| CDKAL1 | rs201884896 | 21657694 | D,R | 0.9455 | 0.3238 | 0.082   | 0.189  | 0.1879 | 0.6646 |
| CDKAL1 | rs574039752 | 21629819 | R,D | 0.3639 | 0.9279 | 0.023   | 0.054  | 0.1868 | 0.6656 |
| CDKAL1 | rs1744878   | 21652230 | A,C | 0.8076 | 0.9338 | 0.028   | 0.067  | 0.181  | 0.6705 |
| CDKAL1 | rs1744866   | 21631188 | C,T | 0.9885 | 0.3807 | -0.497  | 1.172  | 0.1797 | 0.6716 |
| CDKAL1 | rs36024930  | 21605537 | R,D | 0.7795 | 0.8154 | -0.03   | 0.072  | 0.1764 | 0.6745 |
| CDKAL1 | rs9466164   | 21723538 | A,G | 0.8284 | 0.9494 | 0.033   | 0.079  | 0.1714 | 0.6789 |
| CDKAL1 | rs7772337   | 21726278 | C,T | 0.8256 | 0.9612 | 0.032   | 0.078  | 0.1689 | 0.6811 |
| CDKAL1 | rs6456442   | 21698279 | T,C | 0.5821 | 0.821  | -0.033  | 0.081  | 0.1649 | 0.6847 |
| CDKAL1 | rs62403977  | 21725337 | C,T | 0.8232 | 0.9705 | 0.032   | 0.078  | 0.1639 | 0.6855 |
| CDKAL1 | rs141900910 | 21647244 | C,T | 0.9864 | 0.543  | -1.036  | 2.565  | 0.1633 | 0.6861 |
| CDKAL1 | rs9460668   | 21727929 | C,G | 0.8216 | 0.9705 | 0.031   | 0.078  | 0.1608 | 0.6885 |
| CDKAL1 | rs117538721 | 21647180 | T,C | 0.986  | 0.5245 | -1.001  | 2.499  | 0.1606 | 0.6886 |
| CDKAL1 | rs138387168 | 21716280 | C,T | 0.9765 | 0.7359 | -1.262  | 3.228  | 0.1528 | 0.6958 |
| CDKAL1 | rs35857450  | 21622415 | D,R | 0.6703 | 0.8902 | -0.023  | 0.059  | 0.1519 | 0.6967 |
| CDKAL1 | rs369470901 | 21707320 | R,I | 0.6014 | 0.9269 | -0.029  | 0.074  | 0.151  | 0.6976 |
| CDKAL1 | rs9460660   | 21709294 | T,C | 0.616  | 0.9365 | -0.028  | 0.072  | 0.1491 | 0.6993 |
| CDKAL1 | rs7772258   | 21686985 | T,C | 0.8466 | 0.7118 | 0.055   | 0.142  | 0.1474 | 0.701  |
| CDKAL1 | rs79232286  | 21689146 | G,A | 0.8483 | 0.7428 | 0.053   | 0.14   | 0.1462 | 0.7022 |
| CDKAL1 | rs59759742  | 21707319 | T,G | 0.6009 | 0.9285 | -0.028  | 0.074  | 0.144  | 0.7043 |
| CDKAL1 | rs62403974  | 21713978 | T,C | 0.7736 | 0.9053 | 0.029   | 0.076  | 0.1425 | 0.7058 |
| CDKAL1 | rs141007801 | 21722788 | R,I | 0.8394 | 0.8482 | 0.033   | 0.088  | 0.1413 | 0.707  |
| CDKAL1 | rs140423760 | 21646093 | C,A | 0.9884 | 0.552  | -1.123  | 3.009  | 0.1393 | 0.709  |
| CDKAL1 | rs1740864   | 21668282 | G,A | 0.6096 | 0.9094 | 0.02    | 0.055  | 0.1354 | 0.7129 |
| CDKAL1 | rs68015368  | 21645499 | I,R | 0.8315 | 0.7435 | 0.028   | 0.077  | 0.1304 | 0.718  |
| CDKAL1 | rs57761609  | 21683420 | D,R | 0.6127 | 0.8292 | 0.021   | 0.058  | 0.1303 | 0.7182 |
| CDKAL1 | rs36093392  | 21601725 | D,R | 0.7127 | 0.8142 | -0.024  | 0.068  | 0.1259 | 0.7227 |
| CDKAL1 | rs9460666   | 21726380 | G,A | 0.9296 | 0.3512 | 0.1     | 0.282  | 0.1256 | 0.7231 |
| CDKAL1 | rs9295513   | 21599766 | G,A | 0.9746 | 0.8988 | 9.987   | 28.253 | 0.125  | 0.7237 |
| CDKAL1 | rs1740834   | 21645207 | C,T | 0.7742 | 0.9378 | 0.022   | 0.063  | 0.1205 | 0.7285 |
| CDKAL1 | rs1740838   | 21632759 | G,T | 0.3851 | 0.7571 | 0.022   | 0.063  | 0.1195 | 0.7295 |
| CDKAL1 | rs6456438   | 21632215 | G,A | 0.7029 | 0.9547 | 0.019   | 0.056  | 0.1171 | 0.7322 |
| CDKAL1 | rs111684701 | 21608562 | C,T | 0.9809 | 0.9509 | -25.924 | 75.826 | 0.1169 | 0.7324 |
| CDKAL1 | rs112892524 | 21608321 | C,T | 0.981  | 0.9464 | -25.924 | 75.826 | 0.1169 | 0.7324 |
| CDKAL1 | rs11433545  | 21672216 | R,I | 0.5947 | 0.6034 | -0.024  | 0.071  | 0.1144 | 0.7352 |
| CDKAL1 | rs116878740 | 21665291 | A,G | 0.9855 | 0.5757 | -8.241  | 24.52  | 0.113  | 0.7368 |
| CDKAL1 | rs141673420 | 21695454 | T,C | 0.9835 | 0.3745 | 0.207   | 0.63   | 0.1084 | 0.7419 |
| CDKAL1 | rs1744881   | 21657548 | G,A | 0.8047 | 0.8556 | 0.022   | 0.066  | 0.1069 | 0.7437 |

|        |             |          |     |        |        |        |        |        |        |
|--------|-------------|----------|-----|--------|--------|--------|--------|--------|--------|
| CDKAL1 | rs1740837   | 21633917 | C,T | 0.6783 | 0.9174 | -0.019 | 0.06   | 0.1067 | 0.7439 |
| CDKAL1 | rs140643662 | 21664544 | G,A | 0.9855 | 0.5752 | -7.235 | 22.425 | 0.1041 | 0.747  |
| CDKAL1 | rs1744889   | 21676795 | A,G | 0.6165 | 0.9936 | 0.017  | 0.053  | 0.1023 | 0.7491 |
| CDKAL1 | rs1740863   | 21670641 | C,T | 0.6246 | 0.9994 | 0.017  | 0.053  | 0.1016 | 0.7499 |
| CDKAL1 | rs9466145   | 21677060 | A,C | 0.6171 | 1      | 0.017  | 0.053  | 0.1016 | 0.7499 |
| CDKAL1 | rs571708107 | 21634038 | D,R | 0.6795 | 0.8686 | -0.019 | 0.06   | 0.1015 | 0.75   |
| CDKAL1 | rs2749684   | 21676485 | C,T | 0.6168 | 0.9872 | 0.017  | 0.053  | 0.0998 | 0.752  |
| CDKAL1 | rs11327351  | 21623643 | D,R | 0.6711 | 0.9267 | -0.018 | 0.058  | 0.0998 | 0.7521 |
| CDKAL1 | rs1744864   | 21630684 | C,T | 0.7008 | 1      | 0.017  | 0.054  | 0.0991 | 0.7529 |
| CDKAL1 | rs201513044 | 21589010 | R,D | 0.9897 | 0.4337 | 0.478  | 1.52   | 0.0989 | 0.7532 |
| CDKAL1 | rs1744885   | 21670816 | A,G | 0.4476 | 0.9803 | -0.016 | 0.053  | 0.0958 | 0.7569 |
| CDKAL1 | rs9466154   | 21706155 | G,T | 0.6423 | 0.8816 | -0.023 | 0.076  | 0.0954 | 0.7574 |
| CDKAL1 | rs1740854   | 21680732 | A,C | 0.6112 | 0.9639 | 0.016  | 0.053  | 0.0949 | 0.7581 |
| CDKAL1 | rs6939472   | 21661019 | G,C | 0.7866 | 0.7792 | 0.02   | 0.065  | 0.0936 | 0.7597 |
| CDKAL1 | rs5874828   | 21692948 | R,D | 0.8716 | 0.725  | 0.043  | 0.142  | 0.0926 | 0.761  |
| CDKAL1 | rs12528435  | 21562732 | G,A | 0.8866 | 0.355  | -0.051 | 0.167  | 0.091  | 0.7629 |
| CDKAL1 | rs6912946   | 21659978 | A,T | 0.8051 | 0.821  | 0.019  | 0.065  | 0.0893 | 0.765  |
| CDKAL1 | rs1740835   | 21637725 | G,A | 0.7724 | 0.8961 | 0.019  | 0.065  | 0.0871 | 0.7678 |
| CDKAL1 | rs1740839   | 21629928 | G,A | 0.7114 | 0.9827 | 0.016  | 0.055  | 0.086  | 0.7694 |
| CDKAL1 | rs112101248 | 21683625 | T,C | 0.9893 | 0.5442 | -3.082 | 10.688 | 0.0832 | 0.773  |
| CDKAL1 | rs1744890   | 21678059 | A,G | 0.8017 | 0.7924 | 0.018  | 0.061  | 0.0825 | 0.7739 |
| CDKAL1 | rs1740836   | 21634644 | G,A | 0.7705 | 0.8935 | 0.018  | 0.065  | 0.08   | 0.7773 |
| CDKAL1 | rs5874825   | 21634749 | I,R | 0.7699 | 0.8924 | 0.018  | 0.065  | 0.0793 | 0.7782 |
| CDKAL1 | rs7751661   | 21621850 | G,A | 0.6705 | 1      | -0.016 | 0.055  | 0.0784 | 0.7794 |
| CDKAL1 | rs1740846   | 21621045 | A,G | 0.6874 | 0.9924 | -0.016 | 0.056  | 0.0775 | 0.7806 |
| CDKAL1 | rs147268567 | 21621169 | D,R | 0.6874 | 0.993  | -0.016 | 0.056  | 0.0775 | 0.7807 |
| CDKAL1 | rs1740845   | 21621731 | G,A | 0.6871 | 0.9929 | -0.016 | 0.056  | 0.0775 | 0.7807 |
| CDKAL1 | rs1744852   | 21621724 | A,G | 0.6871 | 0.9927 | -0.016 | 0.056  | 0.0775 | 0.7807 |
| CDKAL1 | rs149019701 | 21621670 | D,R | 0.6874 | 0.9939 | -0.016 | 0.056  | 0.0774 | 0.7808 |
| CDKAL1 | rs542285387 | 21621459 | I,R | 0.6862 | 0.9884 | -0.016 | 0.056  | 0.0773 | 0.7811 |
| CDKAL1 | rs1740860   | 21678055 | T,C | 0.7991 | 0.7824 | 0.017  | 0.061  | 0.075  | 0.7842 |
| CDKAL1 | rs9460651   | 21622531 | G,T | 0.672  | 0.9951 | -0.015 | 0.055  | 0.0748 | 0.7845 |
| CDKAL1 | rs117537289 | 21661595 | C,T | 0.9854 | 0.5671 | -4.239 | 15.622 | 0.0736 | 0.7861 |
| CDKAL1 | rs11330136  | 21629471 | D,R | 0.7    | 0.9778 | 0.015  | 0.055  | 0.0727 | 0.7875 |
| CDKAL1 | rs1740848   | 21620293 | G,A | 0.6882 | 0.9886 | -0.015 | 0.057  | 0.0722 | 0.7882 |
| CDKAL1 | rs1740847   | 21620469 | C,A | 0.6882 | 0.9889 | -0.015 | 0.057  | 0.072  | 0.7884 |
| CDKAL1 | rs562901644 | 21554922 | R,D | 0.9157 | 0.7168 | -0.029 | 0.109  | 0.0706 | 0.7905 |
| CDKAL1 | rs80349490  | 21615188 | T,C | 0.9491 | 0.4807 | 0.054  | 0.208  | 0.0663 | 0.7968 |
| CDKAL1 | rs1615194   | 21648442 | T,C | 0.7437 | 0.9296 | 0.016  | 0.063  | 0.0653 | 0.7982 |
| CDKAL1 | rs79847215  | 21560355 | C,A | 0.9848 | 0.3334 | 0.102  | 0.402  | 0.0641 | 0.8001 |
| CDKAL1 | rs1744875   | 21648534 | C,A | 0.4998 | 0.4732 | -0.021 | 0.087  | 0.0611 | 0.8048 |
| CDKAL1 | rs35605844  | 21674022 | D,R | 0.6185 | 0.9309 | 0.013  | 0.054  | 0.0598 | 0.8068 |
| CDKAL1 | rs79846403  | 21723244 | C,T | 0.8348 | 0.8403 | 0.02   | 0.083  | 0.0589 | 0.8083 |
| CDKAL1 | rs138691949 | 21653247 | A,T | 0.9812 | 0.5466 | -0.738 | 3.121  | 0.0559 | 0.813  |
| CDKAL1 | rs1740844   | 21622871 | C,T | 0.6724 | 0.9911 | -0.013 | 0.056  | 0.0555 | 0.8137 |

|        |             |          |     |        |        |         |         |        |        |
|--------|-------------|----------|-----|--------|--------|---------|---------|--------|--------|
| CDKAL1 | rs7772583   | 21726279 | G,A | 0.6306 | 0.9061 | -0.017  | 0.074   | 0.0554 | 0.814  |
| CDKAL1 | rs1740833   | 21646435 | A,G | 0.6798 | 0.9621 | -0.013  | 0.058   | 0.0542 | 0.8159 |
| CDKAL1 | rs7773111   | 21696531 | G,A | 0.6146 | 0.751  | -0.021  | 0.088   | 0.0541 | 0.8161 |
| CDKAL1 | rs10643502  | 21641556 | T,C | 0.688  | 0.853  | -0.014  | 0.062   | 0.0533 | 0.8174 |
| CDKAL1 | rs2749683   | 21635327 | T,G | 0.767  | 0.8784 | 0.015   | 0.066   | 0.053  | 0.8179 |
| CDKAL1 | rs1744874   | 21640902 | T,C | 0.7492 | 0.9047 | 0.015   | 0.064   | 0.0526 | 0.8186 |
| CDKAL1 | rs149455365 | 21553549 | R,D | 0.9357 | 0.9431 | -0.024  | 0.107   | 0.0518 | 0.82   |
| CDKAL1 | rs146516474 | 21554348 | C,T | 0.9266 | 0.8769 | -0.024  | 0.108   | 0.0505 | 0.8222 |
| CDKAL1 | rs67418443  | 21554442 | C,T | 0.9266 | 0.876  | -0.024  | 0.108   | 0.0505 | 0.8222 |
| CDKAL1 | rs116239840 | 21722970 | A,C | 0.8218 | 0.9134 | 0.018   | 0.079   | 0.0504 | 0.8224 |
| CDKAL1 | rs9460664   | 21723621 | G,A | 0.8102 | 0.9858 | 0.017   | 0.074   | 0.0501 | 0.8229 |
| CDKAL1 | rs561593549 | 21641496 | C,T | 0.7285 | 0.8534 | -0.014  | 0.061   | 0.0496 | 0.8237 |
| CDKAL1 | rs562290828 | 21641555 | D,R | 0.7285 | 0.8538 | -0.014  | 0.061   | 0.0494 | 0.8241 |
| CDKAL1 | rs370328808 | 21641504 | D,R | 0.7285 | 0.8536 | -0.014  | 0.061   | 0.0494 | 0.8242 |
| CDKAL1 | rs7770799   | 21553258 | A,C | 0.9337 | 0.9722 | -0.023  | 0.105   | 0.0494 | 0.8242 |
| CDKAL1 | rs113411153 | 21641562 | D,R | 0.7285 | 0.8541 | -0.013  | 0.061   | 0.0492 | 0.8245 |
| CDKAL1 | rs529643978 | 21641557 | D,R | 0.7285 | 0.854  | -0.013  | 0.061   | 0.0492 | 0.8245 |
| CDKAL1 | rs73392011  | 21569756 | C,T | 0.9671 | 0.445  | 0.062   | 0.283   | 0.0485 | 0.8258 |
| CDKAL1 | rs7739666   | 21718260 | T,C | 0.9818 | 0.939  | 22.676  | 103.164 | 0.0483 | 0.826  |
| CDKAL1 | rs1744873   | 21638871 | C,T | 0.7506 | 0.8981 | 0.014   | 0.064   | 0.048  | 0.8265 |
| CDKAL1 | rs1744872   | 21638599 | C,T | 0.7505 | 0.8975 | 0.014   | 0.064   | 0.0478 | 0.8269 |
| CDKAL1 | rs1744871   | 21638566 | C,T | 0.7505 | 0.8974 | 0.014   | 0.064   | 0.0477 | 0.827  |
| CDKAL1 | rs5874829   | 21738740 | R,I | 0.8074 | 0.7675 | -0.018  | 0.084   | 0.0474 | 0.8277 |
| CDKAL1 | rs111526226 | 21567385 | T,C | 0.968  | 0.4673 | 0.06    | 0.278   | 0.0468 | 0.8288 |
| CDKAL1 | rs1740842   | 21623181 | G,A | 0.6726 | 0.9885 | -0.012  | 0.056   | 0.0467 | 0.8288 |
| CDKAL1 | rs36027263  | 21648358 | I,R | 0.7129 | 0.8819 | 0.014   | 0.064   | 0.0465 | 0.8292 |
| CDKAL1 | rs7756206   | 21635314 | T,G | 0.7423 | 0.8724 | 0.014   | 0.065   | 0.0459 | 0.8303 |
| CDKAL1 | rs1740840   | 21627378 | G,A | 0.7156 | 0.9808 | 0.012   | 0.056   | 0.0457 | 0.8306 |
| CDKAL1 | rs1744853   | 21623386 | A,G | 0.6725 | 0.9887 | -0.012  | 0.056   | 0.0458 | 0.8306 |
| CDKAL1 | rs149699118 | 21633666 | D,R | 0.7515 | 0.8935 | 0.014   | 0.065   | 0.0452 | 0.8316 |
| CDKAL1 | rs1740868   | 21660205 | G,T | 0.6798 | 0.8487 | -0.012  | 0.059   | 0.0451 | 0.8318 |
| CDKAL1 | rs7772163   | 21726011 | G,C | 0.8088 | 0.9857 | 0.015   | 0.074   | 0.0439 | 0.8341 |
| CDKAL1 | rs6926491   | 21724670 | G,A | 0.8091 | 0.9926 | 0.015   | 0.074   | 0.0437 | 0.8343 |
| CDKAL1 | rs9466165   | 21724322 | T,C | 0.8089 | 0.9953 | 0.015   | 0.074   | 0.0435 | 0.8348 |
| CDKAL1 | rs1744854   | 21623686 | C,T | 0.6725 | 0.9882 | -0.012  | 0.056   | 0.0433 | 0.8351 |
| CDKAL1 | rs6925119   | 21701083 | G,A | 0.6412 | 0.822  | -0.017  | 0.081   | 0.0433 | 0.8353 |
| CDKAL1 | rs6925679   | 21724480 | A,G | 0.8086 | 1      | 0.015   | 0.074   | 0.042  | 0.8375 |
| CDKAL1 | rs9460665   | 21724144 | G,A | 0.8084 | 1      | 0.015   | 0.074   | 0.042  | 0.8375 |
| CDKAL1 | rs71563992  | 21655825 | G,T | 0.9888 | 0.8713 | -1.53   | 7.469   | 0.042  | 0.8377 |
| CDKAL1 | rs74785728  | 21611723 | G,A | 0.9819 | 0.9332 | -14.463 | 72.691  | 0.0396 | 0.8423 |
| CDKAL1 | rs1744860   | 21627046 | A,G | 0.6998 | 0.9875 | 0.011   | 0.055   | 0.0391 | 0.8432 |
| CDKAL1 | rs66647983  | 21633079 | R,D | 0.5368 | 0.3749 | 0.017   | 0.088   | 0.0381 | 0.8453 |
| CDKAL1 | rs9466163   | 21723532 | C,T | 0.809  | 0.9768 | 0.014   | 0.074   | 0.0379 | 0.8457 |
| CDKAL1 | rs201453060 | 21648925 | R,I | 0.5221 | 0.4872 | -0.017  | 0.087   | 0.0371 | 0.8472 |
| CDKAL1 | rs941990    | 21658881 | A,G | 0.6778 | 0.8561 | -0.011  | 0.059   | 0.0363 | 0.849  |

|        |             |          |     |        |        |        |        |        |        |
|--------|-------------|----------|-----|--------|--------|--------|--------|--------|--------|
| CDKAL1 | rs117061311 | 21683546 | G,A | 0.9853 | 0.4203 | 3.462  | 18.219 | 0.0361 | 0.8493 |
| CDKAL1 | rs111355896 | 21649454 | I,R | 0.7486 | 0.9074 | 0.012  | 0.064  | 0.0354 | 0.8507 |
| CDKAL1 | rs9466161   | 21722916 | T,C | 0.7866 | 0.8907 | 0.015  | 0.079  | 0.0352 | 0.8511 |
| CDKAL1 | rs1744880   | 21653046 | A,G | 0.6868 | 0.9845 | -0.011 | 0.057  | 0.0349 | 0.8519 |
| CDKAL1 | rs9348480   | 21617782 | G,A | 0.7922 | 0.9408 | -0.012 | 0.067  | 0.0346 | 0.8525 |
| CDKAL1 | rs11757166  | 21652990 | C,T | 0.6883 | 0.9879 | -0.011 | 0.057  | 0.0341 | 0.8534 |
| CDKAL1 | rs1744879   | 21652741 | A,G | 0.6892 | 0.9997 | -0.011 | 0.057  | 0.0341 | 0.8535 |
| CDKAL1 | rs1744857   | 21626067 | T,C | 0.6993 | 0.9886 | 0.01   | 0.055  | 0.0329 | 0.856  |
| CDKAL1 | rs2749688   | 21658487 | G,C | 0.6992 | 0.8356 | -0.011 | 0.059  | 0.0319 | 0.8583 |
| CDKAL1 | rs1740841   | 21627053 | G,T | 0.6852 | 0.9798 | 0.01   | 0.055  | 0.0314 | 0.8593 |
| CDKAL1 | rs7746995   | 21686064 | G,A | 0.9859 | 0.4629 | 1.047  | 5.958  | 0.0309 | 0.8606 |
| CDKAL1 | rs9460655   | 21641564 | C,T | 0.6926 | 0.8571 | -0.011 | 0.062  | 0.0301 | 0.8622 |
| CDKAL1 | rs1744882   | 21657561 | T,G | 0.7003 | 0.8473 | -0.01  | 0.059  | 0.0299 | 0.8627 |
| CDKAL1 | rs78712702  | 21700242 | T,A | 0.9843 | 0.4664 | -0.061 | 0.353  | 0.0296 | 0.8634 |
| CDKAL1 | rs1744862   | 21629881 | C,A | 0.6612 | 0.9531 | -0.01  | 0.056  | 0.0291 | 0.8646 |
| CDKAL1 | rs1744863   | 21629887 | A,G | 0.6612 | 0.9532 | -0.009 | 0.056  | 0.0288 | 0.8652 |
| CDKAL1 | rs1744859   | 21626395 | T,C | 0.685  | 0.9803 | 0.009  | 0.055  | 0.0286 | 0.8658 |
| CDKAL1 | rs34197291  | 21611277 | R,D | 0.7729 | 0.7368 | -0.012 | 0.073  | 0.0281 | 0.8669 |
| CDKAL1 | rs1744858   | 21626190 | T,C | 0.6849 | 0.9807 | 0.009  | 0.055  | 0.0268 | 0.8699 |
| CDKAL1 | rs73374447  | 21636151 | C,T | 0.9753 | 0.3    | 0.059  | 0.364  | 0.0266 | 0.8705 |
| CDKAL1 | rs397888201 | 21681363 | R,D | 0.4982 | 0.7168 | 0.01   | 0.063  | 0.0261 | 0.8717 |
| CDKAL1 | rs12664833  | 21614978 | T,G | 0.8033 | 0.9552 | -0.011 | 0.068  | 0.0246 | 0.8753 |
| CDKAL1 | rs4616978   | 21606129 | G,A | 0.8111 | 0.9353 | -0.011 | 0.069  | 0.0245 | 0.8756 |
| CDKAL1 | rs4712624   | 21693152 | A,G | 0.843  | 0.7383 | 0.021  | 0.139  | 0.0236 | 0.8779 |
| CDKAL1 | rs9466168   | 21734750 | C,T | 0.8215 | 0.9954 | -0.011 | 0.075  | 0.0229 | 0.8797 |
| CDKAL1 | rs9368325   | 21577508 | C,T | 0.8604 | 0.347  | -0.02  | 0.137  | 0.0224 | 0.8809 |
| CDKAL1 | rs1744892   | 21680206 | A,G | 0.4953 | 0.9943 | 0.008  | 0.053  | 0.0214 | 0.8837 |
| CDKAL1 | rs35528538  | 21613493 | R,D | 0.8281 | 0.9642 | 0.01   | 0.068  | 0.0214 | 0.8837 |
| CDKAL1 | rs199690993 | 21646009 | R,D | 0.9762 | 0.3058 | 0.055  | 0.374  | 0.0212 | 0.8841 |
| CDKAL1 | rs6941630   | 21679102 | C,T | 0.5039 | 0.9783 | 0.008  | 0.053  | 0.0212 | 0.8841 |
| CDKAL1 | rs1744891   | 21679835 | G,A | 0.5058 | 0.9872 | 0.008  | 0.053  | 0.0212 | 0.8843 |
| CDKAL1 | rs1744895   | 21680899 | G,C | 0.4958 | 1      | 0.008  | 0.053  | 0.021  | 0.8847 |
| CDKAL1 | rs1744893   | 21680746 | T,C | 0.5019 | 0.987  | 0.008  | 0.053  | 0.0209 | 0.8851 |
| CDKAL1 | rs1740827   | 21650969 | A,T | 0.7378 | 0.9342 | 0.009  | 0.064  | 0.0207 | 0.8855 |
| CDKAL1 | rs62404141  | 21614140 | G,A | 0.8281 | 0.9622 | 0.01   | 0.068  | 0.0206 | 0.8858 |
| CDKAL1 | rs1740861   | 21678006 | T,C | 0.5038 | 0.9738 | 0.008  | 0.053  | 0.0203 | 0.8868 |
| CDKAL1 | rs1740855   | 21680782 | C,T | 0.5021 | 0.9879 | 0.008  | 0.053  | 0.0201 | 0.8873 |
| CDKAL1 | rs1744886   | 21671092 | A,T | 0.5151 | 0.9725 | 0.007  | 0.053  | 0.019  | 0.8903 |
| CDKAL1 | rs1744865   | 21631078 | A,C | 0.6628 | 0.9515 | -0.008 | 0.056  | 0.0187 | 0.8911 |
| CDKAL1 | rs35001920  | 21676726 | R,D | 0.4775 | 0.9497 | -0.007 | 0.054  | 0.0184 | 0.892  |
| CDKAL1 | rs72317305  | 21669872 | R,D | 0.5156 | 0.9662 | 0.007  | 0.053  | 0.0183 | 0.8923 |
| CDKAL1 | rs150766348 | 21706424 | R,D | 0.6681 | 0.8073 | -0.011 | 0.085  | 0.0172 | 0.8957 |
| CDKAL1 | rs80309179  | 21644884 | G,T | 0.9894 | 0.4434 | -0.202 | 1.548  | 0.017  | 0.8962 |
| CDKAL1 | rs35612989  | 21663201 | R,I | 0.4311 | 0.4511 | -0.01  | 0.078  | 0.0166 | 0.8976 |
| CDKAL1 | rs7739607   | 21632345 | G,C | 0.6821 | 0.9067 | -0.008 | 0.059  | 0.0166 | 0.8976 |

|        |             |          |     |        |        |        |        |        |        |
|--------|-------------|----------|-----|--------|--------|--------|--------|--------|--------|
| CDKAL1 | rs1744894   | 21680886 | T,C | 0.4962 | 0.9953 | 0.007  | 0.053  | 0.0152 | 0.9019 |
| CDKAL1 | rs34987769  | 21678839 | R,I | 0.5043 | 0.9785 | 0.006  | 0.053  | 0.0147 | 0.9033 |
| CDKAL1 | rs1744896   | 21681103 | A,G | 0.5038 | 0.9407 | 0.006  | 0.055  | 0.0137 | 0.9067 |
| CDKAL1 | rs7739585   | 21632295 | A,C | 0.6764 | 0.9279 | -0.007 | 0.057  | 0.0136 | 0.9073 |
| CDKAL1 | rs1740865   | 21668071 | C,A | 0.5314 | 0.8949 | 0.006  | 0.055  | 0.0133 | 0.9081 |
| CDKAL1 | rs1740856   | 21681223 | G,A | 0.5041 | 0.9379 | 0.006  | 0.055  | 0.0131 | 0.9087 |
| CDKAL1 | rs10946462  | 21651830 | C,T | 0.6894 | 0.9828 | -0.006 | 0.058  | 0.0125 | 0.9109 |
| CDKAL1 | rs1740825   | 21653689 | T,C | 0.7477 | 0.8767 | 0.006  | 0.063  | 0.0105 | 0.9186 |
| CDKAL1 | rs201389513 | 21635326 | D,R | 0.7672 | 0.8696 | 0.007  | 0.065  | 0.0102 | 0.9194 |
| CDKAL1 | rs13211544  | 21619214 | C,A | 0.8478 | 0.3133 | 0.015  | 0.146  | 0.01   | 0.9202 |
| CDKAL1 | rs9466144   | 21676886 | G,T | 0.943  | 0.852  | 1.76   | 17.914 | 0.0097 | 0.9217 |
| CDKAL1 | rs13219202  | 21683982 | G,A | 0.5273 | 0.7259 | 0.006  | 0.064  | 0.008  | 0.9289 |
| CDKAL1 | rs9466155   | 21707222 | G,A | 0.6726 | 0.8766 | -0.007 | 0.081  | 0.007  | 0.9335 |
| CDKAL1 | rs1740832   | 21646725 | A,G | 0.756  | 0.938  | 0.005  | 0.063  | 0.0069 | 0.9338 |
| CDKAL1 | rs79164129  | 21601917 | T,C | 0.9855 | 0.3283 | 0.031  | 0.378  | 0.0069 | 0.9339 |
| CDKAL1 | rs9460659   | 21696569 | G,C | 0.6689 | 0.7266 | 0.008  | 0.093  | 0.0069 | 0.934  |
| CDKAL1 | rs7763048   | 21681780 | G,A | 0.4974 | 0.8635 | 0.004  | 0.057  | 0.0061 | 0.9375 |
| CDKAL1 | rs2759362   | 21681885 | G,A | 0.5173 | 0.8653 | 0.004  | 0.057  | 0.0057 | 0.9396 |
| CDKAL1 | rs1740857   | 21681617 | T,G | 0.5067 | 0.8693 | 0.004  | 0.057  | 0.0056 | 0.9403 |
| CDKAL1 | rs79693897  | 21695822 | R,D | 0.6627 | 0.717  | 0.007  | 0.093  | 0.0054 | 0.9415 |
| CDKAL1 | rs1740858   | 21682180 | C,T | 0.507  | 0.8636 | 0.004  | 0.057  | 0.0052 | 0.9423 |
| CDKAL1 | rs1740859   | 21682298 | C,T | 0.5072 | 0.8627 | 0.004  | 0.057  | 0.0051 | 0.943  |
| CDKAL1 | rs200822534 | 21701029 | R,D | 0.6386 | 0.6957 | 0.007  | 0.093  | 0.005  | 0.9435 |
| CDKAL1 | rs1744877   | 21651554 | T,C | 0.6891 | 0.9768 | -0.004 | 0.058  | 0.005  | 0.9437 |
| CDKAL1 | rs35829440  | 21655243 | R,I | 0.602  | 0.3134 | 0.007  | 0.098  | 0.0049 | 0.9439 |
| CDKAL1 | rs7754999   | 21705723 | C,T | 0.6691 | 0.8543 | -0.006 | 0.082  | 0.0049 | 0.9443 |
| CDKAL1 | rs12200574  | 21683353 | G,A | 0.5092 | 0.842  | 0.004  | 0.058  | 0.0049 | 0.9445 |
| CDKAL1 | rs1740826   | 21651528 | G,A | 0.6892 | 0.9762 | -0.004 | 0.058  | 0.0049 | 0.9445 |
| CDKAL1 | rs2180418   | 21690172 | A,G | 0.8397 | 0.9885 | 0.005  | 0.087  | 0.0038 | 0.9507 |
| CDKAL1 | rs7741780   | 21685460 | A,G | 0.8336 | 0.732  | 0.006  | 0.099  | 0.0035 | 0.953  |
| CDKAL1 | rs6456439   | 21645743 | T,G | 0.7125 | 0.9939 | 0.004  | 0.061  | 0.0034 | 0.9534 |
| CDKAL1 | rs60908846  | 21646239 | I,R | 0.758  | 0.8675 | 0.004  | 0.062  | 0.0033 | 0.9541 |
| CDKAL1 | rs74831068  | 21693978 | T,C | 0.8189 | 0.778  | -0.007 | 0.13   | 0.0032 | 0.9547 |
| CDKAL1 | rs1744867   | 21634171 | T,C | 0.7381 | 0.8918 | -0.003 | 0.065  | 0.0029 | 0.9571 |
| CDKAL1 | rs77518511  | 21690391 | A,G | 0.9839 | 0.4553 | 0.217  | 4.516  | 0.0023 | 0.9618 |
| CDKAL1 | rs57442902  | 21704602 | C,T | 0.6719 | 0.8494 | -0.004 | 0.083  | 0.0023 | 0.9619 |
| CDKAL1 | rs2749682   | 21641716 | A,G | 0.6939 | 0.947  | -0.003 | 0.063  | 0.0023 | 0.962  |
| CDKAL1 | rs534329540 | 21629251 | R,I | 0.4972 | 0.5784 | 0.003  | 0.072  | 0.0023 | 0.9621 |
| CDKAL1 | rs6933751   | 21704108 | T,C | 0.672  | 0.8471 | -0.004 | 0.083  | 0.002  | 0.9643 |
| CDKAL1 | rs4712625   | 21699342 | G,A | 0.8761 | 0.9937 | -0.004 | 0.083  | 0.0019 | 0.9654 |
| CDKAL1 | rs6904795   | 21703099 | A,G | 0.6649 | 0.8486 | -0.004 | 0.083  | 0.0019 | 0.9654 |
| CDKAL1 | rs11380611  | 21703686 | R,I | 0.6704 | 0.84   | -0.004 | 0.083  | 0.0019 | 0.9656 |
| CDKAL1 | rs2328624   | 21703736 | G,C | 0.672  | 0.8448 | -0.003 | 0.083  | 0.0017 | 0.9669 |
| CDKAL1 | rs4712626   | 21701841 | G,A | 0.6545 | 0.8328 | -0.003 | 0.084  | 0.0015 | 0.9687 |
| CDKAL1 | rs1744870   | 21638485 | A,C | 0.734  | 0.9006 | -0.002 | 0.064  | 0.0013 | 0.9709 |

|        |             |          |     |        |        |        |       |        |        |
|--------|-------------|----------|-----|--------|--------|--------|-------|--------|--------|
| CDKAL1 | rs9368326   | 21590104 | A,G | 0.8056 | 0.5535 | 0.003  | 0.089 | 0.0013 | 0.9711 |
| CDKAL1 | rs9295514   | 21636585 | A,G | 0.7107 | 0.9234 | -0.002 | 0.064 | 0.0013 | 0.9717 |
| CDKAL1 | rs2328625   | 21703880 | T,C | 0.6717 | 0.8446 | -0.003 | 0.083 | 0.0012 | 0.9722 |
| CDKAL1 | rs2328626   | 21703885 | C,T | 0.6717 | 0.8448 | -0.003 | 0.083 | 0.0012 | 0.9725 |
| CDKAL1 | rs11751574  | 21702901 | G,A | 0.6716 | 0.8382 | -0.003 | 0.084 | 0.0011 | 0.974  |
| CDKAL1 | rs2749681   | 21683792 | A,G | 0.5085 | 0.771  | 0.002  | 0.061 | 0.001  | 0.9745 |
| CDKAL1 | rs6927945   | 21703341 | T,C | 0.672  | 0.841  | -0.003 | 0.083 | 0.001  | 0.9748 |
| CDKAL1 | rs2759360   | 21653532 | A,G | 0.7648 | 0.8809 | 0.002  | 0.065 | 0.0009 | 0.976  |
| CDKAL1 | rs62403971  | 21702621 | T,C | 0.6704 | 0.8339 | -0.002 | 0.084 | 0.0009 | 0.9763 |
| CDKAL1 | rs1740866   | 21664729 | T,G | 0.7801 | 0.807  | 0.002  | 0.064 | 0.0009 | 0.9766 |
| CDKAL1 | rs1740831   | 21647589 | G,A | 0.7131 | 0.9772 | 0.002  | 0.062 | 0.0008 | 0.9771 |
| CDKAL1 | rs148261621 | 21712086 | R,I | 0.7162 | 0.7178 | -0.003 | 0.09  | 0.0008 | 0.9775 |
| CDKAL1 | rs55686449  | 21702505 | T,C | 0.6687 | 0.8289 | -0.002 | 0.084 | 0.0008 | 0.9776 |
| CDKAL1 | rs73376030  | 21700390 | T,G | 0.6688 | 0.8019 | 0.002  | 0.085 | 0.0008 | 0.978  |
| CDKAL1 | rs4327678   | 21619771 | T,C | 0.7132 | 0.9834 | -0.002 | 0.056 | 0.0007 | 0.9785 |
| CDKAL1 | rs62403969  | 21702409 | A,C | 0.6716 | 0.8327 | -0.002 | 0.084 | 0.0006 | 0.9798 |
| CDKAL1 | rs13215657  | 21683714 | C,T | 0.511  | 0.7765 | 0.001  | 0.06  | 0.0006 | 0.9802 |
| CDKAL1 | rs1744851   | 21619810 | T,C | 0.7153 | 0.9819 | -0.001 | 0.056 | 0.0006 | 0.9804 |
| CDKAL1 | rs1740851   | 21616268 | T,C | 0.7152 | 0.9852 | -0.001 | 0.057 | 0.0005 | 0.9829 |
| CDKAL1 | rs1744847   | 21695888 | C,T | 0.9409 | 0.4743 | -0.004 | 0.197 | 0.0005 | 0.9831 |
| CDKAL1 | rs4712630   | 21702161 | T,C | 0.6716 | 0.8305 | -0.002 | 0.084 | 0.0004 | 0.9839 |
| CDKAL1 | rs1740853   | 21684065 | G,A | 0.5152 | 0.7328 | -0.001 | 0.062 | 0.0004 | 0.9843 |
| CDKAL1 | rs4712629   | 21702103 | A,G | 0.6716 | 0.83   | -0.002 | 0.084 | 0.0004 | 0.9843 |
| CDKAL1 | rs13219086  | 21683929 | G,C | 0.5137 | 0.7654 | 0.001  | 0.061 | 0.0004 | 0.9844 |
| CDKAL1 | rs4712628   | 21702070 | C,G | 0.6704 | 0.828  | -0.002 | 0.084 | 0.0004 | 0.9845 |
| CDKAL1 | rs4712627   | 21701892 | C,T | 0.6719 | 0.828  | -0.001 | 0.084 | 0.0003 | 0.9862 |
| CDKAL1 | rs13362741  | 21700158 | A,C | 0.6707 | 0.8039 | 0.001  | 0.086 | 0.0003 | 0.9864 |
| CDKAL1 | rs1744849   | 21612949 | A,G | 0.7238 | 1      | -0.001 | 0.058 | 0.0002 | 0.9879 |
| CDKAL1 | rs1744850   | 21618916 | G,T | 0.7128 | 0.9828 | -0.001 | 0.057 | 0.0002 | 0.9879 |
| CDKAL1 | rs1740850   | 21618925 | C,G | 0.7147 | 0.9839 | -0.001 | 0.057 | 0.0002 | 0.9886 |
| CDKAL1 | rs112153247 | 21701183 | C,T | 0.6716 | 0.8121 | 0.001  | 0.085 | 0.0002 | 0.9887 |
| CDKAL1 | rs561618338 | 21639342 | R,I | 0.9855 | 0.4795 | 0.042  | 3.337 | 0.0002 | 0.9899 |
| CDKAL1 | rs1740843   | 21623041 | G,A | 0.6876 | 0.9919 | 0.001  | 0.055 | 0.0001 | 0.9904 |
| CDKAL1 | rs7742225   | 21685474 | G,A | 0.827  | 0.7132 | 0.001  | 0.101 | 0.0001 | 0.9911 |
| CDKAL1 | rs59493338  | 21646242 | T,A | 0.701  | 0.8468 | -0.001 | 0.064 | 0.0001 | 0.9918 |
| CDKAL1 | rs59730691  | 21701056 | C,T | 0.6717 | 0.8117 | 0.001  | 0.085 | 0.0001 | 0.9932 |
| CDKAL1 | rs1744884   | 21663449 | G,A | 0.7593 | 0.786  | 0      | 0.063 | 0.0001 | 0.9938 |
| CDKAL1 | rs7761575   | 21701475 | C,T | 0.672  | 0.8148 | 0.001  | 0.085 | 0.0001 | 0.9943 |
| CDKAL1 | rs1740867   | 21663105 | C,T | 0.7594 | 0.7883 | 0      | 0.063 | 0      | 0.9949 |
| CDKAL1 | rs62406886  | 21701119 | T,C | 0.6631 | 0.8167 | 0      | 0.085 | 0      | 0.9953 |
| CDKAL1 | rs62406887  | 21701319 | C,T | 0.6717 | 0.8135 | 0      | 0.085 | 0      | 0.9955 |
| CDKAL1 | rs7761844   | 21701456 | G,A | 0.6722 | 0.8149 | 0      | 0.085 | 0      | 0.9981 |
| CDKAL1 | rs7761595   | 21701550 | A,G | 0.6721 | 0.8165 | 0      | 0.085 | 0      | 0.9985 |
| CDKAL1 | rs7762010   | 21701594 | G,A | 0.6719 | 0.8177 | 0      | 0.085 | 0      | 0.9997 |
| CDKAL1 | rs7739235   | 21609345 | A,T | 0.9799 | 0.962  | 0      | 1E+15 | 0      | 1      |

|        |           |          |     |        |       |   |       |   |   |
|--------|-----------|----------|-----|--------|-------|---|-------|---|---|
| CDKAL1 | rs7740142 | 21609635 | G,A | 0.9809 | 0.955 | 0 | 1E+15 | 0 | 1 |
| CDKAL1 | rs9460649 | 21614884 | G,A | 0.9843 | 0.994 | 0 | 1E+15 | 0 | 1 |

SNP association with **SOX4** sorted by p-value

|      |             |          |     |        |        |        |       |        |         |
|------|-------------|----------|-----|--------|--------|--------|-------|--------|---------|
| SOX4 | rs7739131   | 21727148 | C,T | 0.7149 | 0.9794 | 0.808  | 0.311 | 6.7364 | 0.00945 |
| SOX4 | rs78584681  | 21743570 | R,D | 0.7497 | 0.6177 | 0.932  | 0.379 | 6.0368 | 0.01401 |
| SOX4 | rs145960980 | 21729330 | D,R | 0.4093 | 0.9758 | -0.68  | 0.289 | 5.5456 | 0.01853 |
| SOX4 | rs9460669   | 21729251 | A,G | 0.4053 | 0.9459 | -0.685 | 0.292 | 5.4967 | 0.01905 |
| SOX4 | rs7775506   | 21729962 | C,T | 0.4216 | 0.9976 | -0.649 | 0.277 | 5.4863 | 0.01917 |
| SOX4 | rs2180419   | 21728317 | A,G | 0.4028 | 0.9843 | -0.637 | 0.285 | 5.0049 | 0.02528 |
| SOX4 | rs1830667   | 21728089 | G,T | 0.4027 | 0.9868 | -0.633 | 0.284 | 4.9629 | 0.0259  |
| SOX4 | rs1407655   | 21727902 | G,A | 0.4028 | 0.9882 | -0.63  | 0.284 | 4.9262 | 0.02645 |
| SOX4 | rs7744078   | 21727822 | G,C | 0.4006 | 0.9944 | -0.629 | 0.284 | 4.9087 | 0.02672 |
| SOX4 | rs7764209   | 21727755 | A,T | 0.4006 | 0.9953 | -0.627 | 0.284 | 4.8963 | 0.02692 |
| SOX4 | rs7740084   | 21727531 | A,G | 0.4005 | 0.9983 | -0.625 | 0.283 | 4.8695 | 0.02733 |
| SOX4 | rs10636012  | 21727515 | I,R | 0.4062 | 0.9929 | -0.622 | 0.283 | 4.8435 | 0.02775 |
| SOX4 | rs11753001  | 21726506 | T,C | 0.9147 | 0.5112 | 1.556  | 0.715 | 4.7325 | 0.0296  |
| SOX4 | rs9460666   | 21726380 | G,A | 0.9296 | 0.3512 | 2.809  | 1.373 | 4.1831 | 0.04083 |
| SOX4 | rs7760462   | 21730877 | G,C | 0.4165 | 0.9846 | -0.571 | 0.285 | 4.0301 | 0.04469 |
| SOX4 | rs9368332   | 21731094 | G,A | 0.4156 | 0.9974 | -0.562 | 0.284 | 3.918  | 0.04777 |
| SOX4 | rs35578300  | 21741886 | R,D | 0.7077 | 0.8309 | 0.609  | 0.312 | 3.8106 | 0.05093 |
| SOX4 | rs80177376  | 21744978 | C,T | 0.9048 | 0.3545 | 0.859  | 0.441 | 3.8043 | 0.05112 |
| SOX4 | rs6925679   | 21724480 | A,G | 0.8086 | 1      | 0.692  | 0.359 | 3.7153 | 0.05392 |
| SOX4 | rs9460665   | 21724144 | G,A | 0.8084 | 1      | 0.692  | 0.359 | 3.7153 | 0.05392 |
| SOX4 | rs9466165   | 21724322 | T,C | 0.8089 | 0.9953 | 0.693  | 0.36  | 3.7068 | 0.05419 |
| SOX4 | rs6926491   | 21724670 | G,A | 0.8091 | 0.9926 | 0.693  | 0.36  | 3.7064 | 0.0542  |
| SOX4 | rs7772163   | 21726011 | G,C | 0.8088 | 0.9857 | 0.693  | 0.36  | 3.7057 | 0.05423 |
| SOX4 | rs9460671   | 21731289 | G,C | 0.41   | 0.9868 | -0.547 | 0.284 | 3.7031 | 0.05431 |
| SOX4 | rs9460664   | 21723621 | G,A | 0.8102 | 0.9858 | 0.695  | 0.362 | 3.6967 | 0.05452 |
| SOX4 | rs9466163   | 21723532 | C,T | 0.809  | 0.9768 | 0.695  | 0.363 | 3.6702 | 0.05539 |
| SOX4 | rs79846403  | 21723244 | C,T | 0.8348 | 0.8403 | 0.774  | 0.406 | 3.6345 | 0.05659 |
| SOX4 | rs9460668   | 21727929 | C,G | 0.8216 | 0.9705 | 0.717  | 0.38  | 3.566  | 0.05898 |
| SOX4 | rs62403977  | 21725337 | C,T | 0.8232 | 0.9705 | 0.718  | 0.38  | 3.5653 | 0.059   |
| SOX4 | rs7772337   | 21726278 | C,T | 0.8256 | 0.9612 | 0.72   | 0.381 | 3.562  | 0.05912 |
| SOX4 | rs116239840 | 21722970 | A,C | 0.8218 | 0.9134 | 0.729  | 0.387 | 3.5419 | 0.05984 |
| SOX4 | rs9466164   | 21723538 | A,G | 0.8284 | 0.9494 | 0.723  | 0.387 | 3.5012 | 0.06133 |
| SOX4 | rs9466161   | 21722916 | T,C | 0.7866 | 0.8907 | 0.718  | 0.384 | 3.4972 | 0.06147 |
| SOX4 | rs147276150 | 21701200 | A,G | 0.9274 | 0.4176 | 1.552  | 0.84  | 3.4179 | 0.06449 |
| SOX4 | rs141007801 | 21722788 | R,I | 0.8394 | 0.8482 | 0.789  | 0.429 | 3.3796 | 0.06601 |
| SOX4 | rs6918842   | 21691009 | C,T | 0.5679 | 0.9924 | -0.604 | 0.33  | 3.3604 | 0.06678 |
| SOX4 | rs66735249  | 21686666 | D,R | 0.551  | 0.8357 | -0.644 | 0.352 | 3.3442 | 0.06744 |
| SOX4 | rs4712632   | 21732137 | G,A | 0.4138 | 0.9644 | -0.519 | 0.284 | 3.3428 | 0.0675  |
| SOX4 | rs1475149   | 21688142 | G,A | 0.5662 | 0.9247 | -0.617 | 0.34  | 3.2847 | 0.06993 |
| SOX4 | rs2181318   | 21691468 | T,C | 0.549  | 0.9168 | -0.605 | 0.334 | 3.2816 | 0.07006 |
| SOX4 | rs9466159   | 21721313 | A,G | 0.8227 | 0.9323 | 0.726  | 0.401 | 3.2756 | 0.07032 |
| SOX4 | rs1555287   | 21686091 | G,A | 0.5629 | 0.8575 | -0.632 | 0.349 | 3.2745 | 0.07037 |

|      |             |          |     |        |        |         |        |        |         |
|------|-------------|----------|-----|--------|--------|---------|--------|--------|---------|
| SOX4 | rs1973986   | 21687571 | A,T | 0.5557 | 0.8895 | -0.621  | 0.344  | 3.2541 | 0.07125 |
| SOX4 | rs4710981   | 21732702 | G,C | 0.4166 | 0.9635 | -0.509  | 0.283  | 3.236  | 0.07204 |
| SOX4 | rs73376077  | 21720504 | C,T | 0.7969 | 0.9025 | 0.714   | 0.402  | 3.1637 | 0.07529 |
| SOX4 | rs34810044  | 21718703 | R,D | 0.7721 | 0.9072 | 0.723   | 0.407  | 3.1591 | 0.07551 |
| SOX4 | rs11968460  | 21718604 | G,A | 0.8056 | 0.9024 | 0.716   | 0.407  | 3.0943 | 0.07857 |
| SOX4 | rs74926222  | 21568994 | C,T | 0.9816 | 0.3776 | 76.447  | 43.487 | 3.0904 | 0.07876 |
| SOX4 | rs35487983  | 21739331 | R,D | 0.6885 | 0.8315 | 0.548   | 0.312  | 3.0733 | 0.07959 |
| SOX4 | rs76714354  | 21572464 | A,G | 0.9805 | 0.3806 | 75.942  | 43.682 | 3.0224 | 0.08212 |
| SOX4 | rs9466158   | 21717309 | T,C | 0.7892 | 0.921  | 0.711   | 0.41   | 3.0038 | 0.08307 |
| SOX4 | rs56004640  | 21716262 | A,G | 0.8113 | 0.9096 | 0.711   | 0.413  | 2.9676 | 0.08495 |
| SOX4 | rs62406884  | 21696308 | C,T | 0.9205 | 0.414  | 1.433   | 0.847  | 2.8591 | 0.09086 |
| SOX4 | rs2144867   | 21689100 | C,T | 0.9874 | 0.3281 | -3.332  | 1.981  | 2.8287 | 0.0926  |
| SOX4 | rs200822534 | 21701029 | R,D | 0.6386 | 0.6957 | 0.765   | 0.455  | 2.827  | 0.09269 |
| SOX4 | rs1853345   | 21742346 | T,C | 0.73   | 0.9808 | 0.47    | 0.284  | 2.7421 | 0.09774 |
| SOX4 | rs148261621 | 21712086 | R,I | 0.7162 | 0.7178 | 0.724   | 0.439  | 2.721  | 0.09903 |
| SOX4 | rs7772583   | 21726279 | G,A | 0.6306 | 0.9061 | 0.596   | 0.362  | 2.7169 | 0.09929 |
| SOX4 | rs57792403  | 21738640 | R,D | 0.4364 | 0.9838 | -0.458  | 0.278  | 2.7123 | 0.09958 |
| SOX4 | rs6456441   | 21658313 | A,T | 0.9842 | 0.4898 | -63.502 | 38.858 | 2.6707 | 0.1022  |
| SOX4 | rs840982    | 21740321 | T,C | 0.4378 | 0.9967 | -0.453  | 0.277  | 2.6684 | 0.1024  |
| SOX4 | rs840981    | 21740238 | G,A | 0.4381 | 1      | -0.452  | 0.277  | 2.6633 | 0.1027  |
| SOX4 | rs7773111   | 21696531 | G,A | 0.6146 | 0.751  | 0.7     | 0.43   | 2.6559 | 0.1032  |
| SOX4 | rs75159243  | 21656071 | A,T | 0.9838 | 0.4842 | -41.901 | 25.741 | 2.6497 | 0.1036  |
| SOX4 | rs115061151 | 21659040 | A,C | 0.9843 | 0.4916 | -69.563 | 42.876 | 2.6322 | 0.1047  |
| SOX4 | rs62406886  | 21701119 | T,C | 0.6631 | 0.8167 | 0.67    | 0.414  | 2.6231 | 0.1053  |
| SOX4 | rs4712626   | 21701841 | G,A | 0.6545 | 0.8328 | 0.659   | 0.407  | 2.6176 | 0.1057  |
| SOX4 | rs6904795   | 21703099 | A,G | 0.6649 | 0.8486 | 0.653   | 0.404  | 2.614  | 0.1059  |
| SOX4 | rs112153247 | 21701183 | C,T | 0.6716 | 0.8121 | 0.672   | 0.416  | 2.6098 | 0.1062  |
| SOX4 | rs7761575   | 21701475 | C,T | 0.672  | 0.8148 | 0.67    | 0.415  | 2.6074 | 0.1064  |
| SOX4 | rs73376030  | 21700390 | T,G | 0.6688 | 0.8019 | 0.669   | 0.415  | 2.6007 | 0.1068  |
| SOX4 | rs7761844   | 21701456 | G,A | 0.6722 | 0.8149 | 0.669   | 0.415  | 2.596  | 0.1071  |
| SOX4 | rs2328625   | 21703880 | T,C | 0.6717 | 0.8446 | 0.652   | 0.405  | 2.594  | 0.1073  |
| SOX4 | rs2328626   | 21703885 | C,T | 0.6717 | 0.8448 | 0.651   | 0.404  | 2.594  | 0.1073  |
| SOX4 | rs7761595   | 21701550 | A,G | 0.6721 | 0.8165 | 0.667   | 0.414  | 2.5937 | 0.1073  |
| SOX4 | rs7762010   | 21701594 | G,A | 0.6719 | 0.8177 | 0.667   | 0.414  | 2.5924 | 0.1074  |
| SOX4 | rs59730691  | 21701056 | C,T | 0.6717 | 0.8117 | 0.669   | 0.416  | 2.5886 | 0.1076  |
| SOX4 | rs62406887  | 21701319 | C,T | 0.6717 | 0.8135 | 0.668   | 0.415  | 2.589  | 0.1076  |
| SOX4 | rs4712627   | 21701892 | C,T | 0.6719 | 0.828  | 0.66    | 0.41   | 2.5868 | 0.1078  |
| SOX4 | rs6927945   | 21703341 | T,C | 0.672  | 0.841  | 0.652   | 0.406  | 2.5824 | 0.1081  |
| SOX4 | rs11751574  | 21702901 | G,A | 0.6716 | 0.8382 | 0.653   | 0.407  | 2.5778 | 0.1084  |
| SOX4 | rs4712628   | 21702070 | C,G | 0.6704 | 0.828  | 0.658   | 0.41   | 2.5771 | 0.1084  |
| SOX4 | rs4712629   | 21702103 | A,G | 0.6716 | 0.83   | 0.657   | 0.41   | 2.5741 | 0.1086  |
| SOX4 | rs4712630   | 21702161 | T,C | 0.6716 | 0.8305 | 0.657   | 0.409  | 2.5741 | 0.1086  |
| SOX4 | rs11380611  | 21703686 | R,I | 0.6704 | 0.84   | 0.65    | 0.405  | 2.5731 | 0.1087  |
| SOX4 | rs13362741  | 21700158 | A,C | 0.6707 | 0.8039 | 0.668   | 0.417  | 2.5731 | 0.1087  |
| SOX4 | rs62403971  | 21702621 | T,C | 0.6704 | 0.8339 | 0.654   | 0.408  | 2.5727 | 0.1087  |



|      |             |          |     |        |        |         |        |        |        |
|------|-------------|----------|-----|--------|--------|---------|--------|--------|--------|
| SOX4 | rs55686449  | 21702505 | T,C | 0.6687 | 0.8289 | 0.654   | 0.408  | 2.5719 | 0.1088 |
| SOX4 | rs62403969  | 21702409 | A,C | 0.6716 | 0.8327 | 0.655   | 0.409  | 2.5717 | 0.1088 |
| SOX4 | rs2328624   | 21703736 | G,C | 0.672  | 0.8448 | 0.649   | 0.405  | 2.5695 | 0.1089 |
| SOX4 | rs6933751   | 21704108 | T,C | 0.672  | 0.8471 | 0.647   | 0.404  | 2.5679 | 0.1091 |
| SOX4 | rs57442902  | 21704602 | C,T | 0.6719 | 0.8494 | 0.645   | 0.403  | 2.5626 | 0.1094 |
| SOX4 | rs60368679  | 21746134 | C,T | 0.9868 | 0.3206 | -2.901  | 1.813  | 2.5595 | 0.1096 |
| SOX4 | rs75994264  | 21745903 | C,T | 0.9868 | 0.3369 | -2.823  | 1.771  | 2.5421 | 0.1108 |
| SOX4 | rs7754999   | 21705723 | C,T | 0.6691 | 0.8543 | 0.634   | 0.398  | 2.54   | 0.111  |
| SOX4 | rs9466155   | 21707222 | G,A | 0.6726 | 0.8766 | 0.628   | 0.394  | 2.5377 | 0.1112 |
| SOX4 | rs6456442   | 21698279 | T,C | 0.5821 | 0.821  | 0.624   | 0.392  | 2.5292 | 0.1118 |
| SOX4 | rs7759495   | 21706044 | G,A | 0.6142 | 0.9046 | 0.557   | 0.351  | 2.5135 | 0.1129 |
| SOX4 | rs375807437 | 21686609 | R,D | 0.5634 | 0.7421 | -0.574  | 0.363  | 2.5072 | 0.1133 |
| SOX4 | rs9460659   | 21696569 | G,C | 0.6689 | 0.7266 | 0.717   | 0.454  | 2.4855 | 0.1149 |
| SOX4 | rs150766348 | 21706424 | R,D | 0.6681 | 0.8073 | 0.651   | 0.413  | 2.4809 | 0.1152 |
| SOX4 | rs6925119   | 21701083 | G,A | 0.6412 | 0.822  | 0.618   | 0.394  | 2.4603 | 0.1168 |
| SOX4 | rs4712623   | 21688978 | C,T | 0.638  | 0.848  | 0.537   | 0.342  | 2.4552 | 0.1171 |
| SOX4 | rs150345835 | 21568080 | R,D | 0.983  | 0.3784 | 65.572  | 41.891 | 2.4501 | 0.1175 |
| SOX4 | rs79693897  | 21695822 | R,D | 0.6627 | 0.717  | 0.711   | 0.455  | 2.4429 | 0.1181 |
| SOX4 | rs4712631   | 21710896 | C,T | 0.586  | 0.9993 | 0.504   | 0.325  | 2.3986 | 0.1214 |
| SOX4 | rs9466156   | 21711491 | C,T | 0.5874 | 0.9998 | 0.504   | 0.325  | 2.3986 | 0.1214 |
| SOX4 | rs9466154   | 21706155 | G,T | 0.6423 | 0.8816 | 0.565   | 0.369  | 2.3399 | 0.1261 |
| SOX4 | rs62403974  | 21713978 | T,C | 0.7736 | 0.9053 | 0.563   | 0.369  | 2.3179 | 0.1279 |
| SOX4 | rs111232506 | 21744922 | C,T | 0.9798 | 0.3015 | -2.594  | 1.727  | 2.2546 | 0.1332 |
| SOX4 | rs59759742  | 21707319 | T,G | 0.6009 | 0.9285 | 0.538   | 0.358  | 2.2544 | 0.1332 |
| SOX4 | rs369470901 | 21707320 | R,I | 0.6014 | 0.9269 | 0.537   | 0.359  | 2.243  | 0.1342 |
| SOX4 | rs73378032  | 21744446 | C,A | 0.9796 | 0.3201 | -2.503  | 1.676  | 2.2322 | 0.1352 |
| SOX4 | rs9460660   | 21709294 | T,C | 0.616  | 0.9365 | 0.525   | 0.352  | 2.2235 | 0.1359 |
| SOX4 | rs112524196 | 21743604 | G,A | 0.9794 | 0.3214 | -2.471  | 1.666  | 2.2002 | 0.138  |
| SOX4 | rs6924745   | 21693837 | C,T | 0.8421 | 0.8514 | 0.687   | 0.471  | 2.133  | 0.1442 |
| SOX4 | rs840985    | 21744508 | G,A | 0.5605 | 0.3093 | -0.707  | 0.488  | 2.1035 | 0.147  |
| SOX4 | rs1322883   | 21720796 | A,G | 0.5867 | 0.9164 | 0.523   | 0.365  | 2.0567 | 0.1515 |
| SOX4 | rs73737565  | 21664442 | T,G | 0.9768 | 0.5564 | -91.084 | 63.967 | 2.0276 | 0.1545 |
| SOX4 | rs73737558  | 21577723 | A,G | 0.9837 | 0.4293 | 56.067  | 39.821 | 1.9824 | 0.1591 |
| SOX4 | rs1989470   | 21715067 | T,A | 0.5732 | 0.9562 | 0.467   | 0.332  | 1.9821 | 0.1592 |
| SOX4 | rs1744887   | 21674378 | G,T | 0.9679 | 0.3275 | 3.001   | 2.179  | 1.8961 | 0.1685 |
| SOX4 | rs570404489 | 21689796 | R,D | 0.7798 | 0.3015 | 1.177   | 0.875  | 1.8081 | 0.1787 |
| SOX4 | rs527350470 | 21640569 | R,D | 0.9745 | 0.7043 | -25.699 | 19.198 | 1.7919 | 0.1807 |
| SOX4 | rs144222210 | 21726206 | C,T | 0.987  | 0.7975 | 4.698   | 3.532  | 1.7692 | 0.1835 |
| SOX4 | rs111357910 | 21723888 | A,G | 0.988  | 0.8511 | 4.608   | 3.476  | 1.7575 | 0.1849 |
| SOX4 | rs149555362 | 21726144 | T,C | 0.9879 | 0.8456 | 4.682   | 3.531  | 1.758  | 0.1849 |
| SOX4 | rs115731554 | 21723090 | C,T | 0.9877 | 0.8291 | 4.578   | 3.467  | 1.7437 | 0.1867 |
| SOX4 | rs78529444  | 21722481 | A,G | 0.9876 | 0.8222 | 4.578   | 3.467  | 1.7437 | 0.1867 |
| SOX4 | rs9350367   | 21555608 | C,T | 0.6563 | 0.3839 | 0.599   | 0.455  | 1.7356 | 0.1877 |
| SOX4 | rs75062640  | 21722533 | A,G | 0.9823 | 0.8162 | 4.55    | 3.457  | 1.7326 | 0.1881 |
| SOX4 | rs9466168   | 21734750 | C,T | 0.8215 | 0.9954 | 0.469   | 0.364  | 1.6616 | 0.1974 |

|      |             |          |     |        |        |         |         |        |        |
|------|-------------|----------|-----|--------|--------|---------|---------|--------|--------|
| SOX4 | rs73392015  | 21591766 | C,T | 0.9671 | 0.4088 | 8.16    | 6.392   | 1.6296 | 0.2018 |
| SOX4 | rs80349490  | 21615188 | T,C | 0.9491 | 0.4807 | 1.283   | 1.014   | 1.6    | 0.2059 |
| SOX4 | rs72175369  | 21738076 | R,D | 0.9214 | 0.781  | 0.481   | 0.391   | 1.5146 | 0.2184 |
| SOX4 | rs16885205  | 21743291 | T,C | 0.8644 | 0.5834 | 0.742   | 0.619   | 1.4371 | 0.2306 |
| SOX4 | rs5874829   | 21738740 | R,I | 0.8074 | 0.7675 | 0.489   | 0.409   | 1.4292 | 0.2319 |
| SOX4 | rs4712620   | 21554898 | A,C | 0.6509 | 0.3847 | 0.522   | 0.437   | 1.4257 | 0.2325 |
| SOX4 | rs1972212   | 21743761 | C,T | 0.8703 | 0.5142 | 0.785   | 0.659   | 1.4178 | 0.2338 |
| SOX4 | rs201513044 | 21589010 | R,D | 0.9897 | 0.4337 | 8.717   | 7.406   | 1.3856 | 0.2392 |
| SOX4 | rs79847215  | 21560355 | C,A | 0.9848 | 0.3334 | 2.294   | 1.956   | 1.3757 | 0.2408 |
| SOX4 | rs138380902 | 21731187 | R,D | 0.9079 | 0.9299 | 0.437   | 0.372   | 1.3745 | 0.241  |
| SOX4 | rs10080820  | 21655815 | C,G | 0.983  | 0.7561 | -27.831 | 23.896  | 1.3564 | 0.2442 |
| SOX4 | rs9466169   | 21746181 | A,G | 0.8659 | 0.4166 | 0.849   | 0.735   | 1.3363 | 0.2477 |
| SOX4 | rs201995762 | 21706002 | R,I | 0.9873 | 0.4393 | 24.143  | 20.916  | 1.3324 | 0.2484 |
| SOX4 | rs35210528  | 21667781 | T,C | 0.9732 | 0.7254 | -100.89 | 87.552  | 1.328  | 0.2492 |
| SOX4 | rs111526226 | 21567385 | T,C | 0.968  | 0.4673 | 1.556   | 1.352   | 1.3245 | 0.2498 |
| SOX4 | rs150435139 | 21707497 | A,G | 0.9874 | 0.4469 | 23.661  | 20.579  | 1.3219 | 0.2503 |
| SOX4 | rs7738599   | 21631790 | A,G | 0.9365 | 0.4203 | -1.306  | 1.136   | 1.3203 | 0.2505 |
| SOX4 | rs12189901  | 21726940 | G,A | 0.9308 | 0.9638 | 0.437   | 0.382   | 1.3117 | 0.2521 |
| SOX4 | rs12191413  | 21740465 | A,T | 0.7737 | 0.8456 | 0.363   | 0.317   | 1.3074 | 0.2529 |
| SOX4 | rs73392011  | 21569756 | C,T | 0.9671 | 0.445  | 1.575   | 1.377   | 1.3073 | 0.2529 |
| SOX4 | rs78714768  | 21631590 | C,T | 0.9845 | 0.8158 | -150.76 | 131.937 | 1.3058 | 0.2532 |
| SOX4 | rs9348484   | 21731460 | C,G | 0.93   | 0.9619 | 0.433   | 0.38    | 1.2966 | 0.2548 |
| SOX4 | rs9358448   | 21731736 | G,A | 0.9305 | 0.9625 | 0.433   | 0.38    | 1.2962 | 0.2549 |
| SOX4 | rs73374447  | 21636151 | C,T | 0.9753 | 0.3    | 2.018   | 1.774   | 1.2943 | 0.2553 |
| SOX4 | rs13211544  | 21619214 | C,A | 0.8478 | 0.3133 | -0.808  | 0.71    | 1.2926 | 0.2556 |
| SOX4 | rs145648458 | 21636404 | T,C | 0.9762 | 0.7475 | -25.949 | 22.958  | 1.2776 | 0.2583 |
| SOX4 | rs74785728  | 21611723 | G,A | 0.9819 | 0.9332 | 399.794 | 354.041 | 1.2752 | 0.2588 |
| SOX4 | rs7451817   | 21735497 | A,C | 0.9341 | 0.9124 | 0.43    | 0.381   | 1.2714 | 0.2595 |
| SOX4 | rs112039884 | 21729100 | C,T | 0.9274 | 0.9676 | 0.423   | 0.378   | 1.2514 | 0.2633 |
| SOX4 | rs75327712  | 21728829 | G,A | 0.9295 | 0.9778 | 0.423   | 0.378   | 1.2514 | 0.2633 |
| SOX4 | rs9358449   | 21732383 | G,A | 0.937  | 0.9915 | 0.423   | 0.378   | 1.2491 | 0.2637 |
| SOX4 | rs10946466  | 21727456 | C,A | 0.9298 | 0.9928 | 0.422   | 0.378   | 1.2451 | 0.2645 |
| SOX4 | rs12206842  | 21734489 | A,T | 0.9372 | 1      | 0.422   | 0.378   | 1.2451 | 0.2645 |
| SOX4 | rs199690993 | 21646009 | R,D | 0.9762 | 0.3058 | 2.029   | 1.821   | 1.2406 | 0.2654 |
| SOX4 | rs13220312  | 21671856 | A,G | 0.9734 | 0.7398 | 167.945 | 153.592 | 1.1956 | 0.2742 |
| SOX4 | rs1744876   | 21651003 | T,C | 0.8157 | 0.9901 | 0.354   | 0.326   | 1.1807 | 0.2772 |
| SOX4 | rs9466140   | 21673293 | A,G | 0.9286 | 0.9271 | 134.079 | 123.446 | 1.1797 | 0.2774 |
| SOX4 | rs12333123  | 21640660 | G,A | 0.9848 | 0.7705 | -32.153 | 29.791  | 1.1648 | 0.2805 |
| SOX4 | rs147273446 | 21638982 | C,G | 0.9761 | 0.7533 | -21.636 | 20.05   | 1.1645 | 0.2805 |
| SOX4 | rs148317817 | 21638986 | G,A | 0.9761 | 0.7532 | -21.636 | 20.05   | 1.1645 | 0.2805 |
| SOX4 | rs145545902 | 21735584 | D,R | 0.6454 | 0.9341 | 0.385   | 0.358   | 1.1556 | 0.2824 |
| SOX4 | rs10155732  | 21639540 | C,T | 0.9761 | 0.7536 | -20.809 | 19.397  | 1.1509 | 0.2834 |
| SOX4 | rs79949484  | 21728966 | G,A | 0.9319 | 0.8819 | 0.448   | 0.419   | 1.142  | 0.2852 |
| SOX4 | rs1744878   | 21652230 | A,C | 0.8076 | 0.9338 | 0.344   | 0.326   | 1.1112 | 0.2918 |
| SOX4 | rs115395409 | 21696639 | C,T | 0.99   | 0.5674 | 7.092   | 6.73    | 1.1103 | 0.292  |

|      |             |          |     |        |        |         |         |        |        |
|------|-------------|----------|-----|--------|--------|---------|---------|--------|--------|
| SOX4 | rs6456438   | 21632215 | G,A | 0.7029 | 0.9547 | 0.287   | 0.273   | 1.1096 | 0.2922 |
| SOX4 | rs11961107  | 21642740 | G,A | 0.9758 | 0.7454 | -15.595 | 14.838  | 1.1046 | 0.2933 |
| SOX4 | rs548416728 | 21647978 | R,D | 0.9747 | 0.6618 | -11.138 | 10.598  | 1.1045 | 0.2933 |
| SOX4 | rs71563994  | 21668435 | T,C | 0.9731 | 0.7255 | -104.6  | 99.662  | 1.1015 | 0.2939 |
| SOX4 | rs11966675  | 21640125 | G,A | 0.9761 | 0.7522 | -19.538 | 18.665  | 1.0957 | 0.2952 |
| SOX4 | rs10155733  | 21639594 | C,T | 0.9761 | 0.7534 | -20.23  | 19.375  | 1.0902 | 0.2964 |
| SOX4 | rs12332790  | 21642505 | C,T | 0.9758 | 0.7456 | -15.536 | 14.969  | 1.0772 | 0.2993 |
| SOX4 | rs150184400 | 21642793 | T,C | 0.9758 | 0.7454 | -15.228 | 14.721  | 1.0701 | 0.3009 |
| SOX4 | rs12333154  | 21640855 | G,A | 0.976  | 0.751  | -18.404 | 17.908  | 1.0562 | 0.3041 |
| SOX4 | rs1744864   | 21630684 | C,T | 0.7008 | 1      | 0.271   | 0.265   | 1.0485 | 0.3059 |
| SOX4 | rs9466133   | 21643948 | C,T | 0.9757 | 0.7442 | -14.223 | 13.893  | 1.048  | 0.306  |
| SOX4 | rs1740839   | 21629928 | G,A | 0.7114 | 0.9827 | 0.273   | 0.268   | 1.0418 | 0.3074 |
| SOX4 | rs9460656   | 21643907 | A,G | 0.9758 | 0.7442 | -14.168 | 14.01   | 1.0227 | 0.3119 |
| SOX4 | rs114977922 | 21638119 | C,G | 0.9762 | 0.7437 | -21.607 | 21.431  | 1.0165 | 0.3134 |
| SOX4 | rs9295515   | 21641667 | C,T | 0.976  | 0.7495 | -17.213 | 17.09   | 1.0145 | 0.3138 |
| SOX4 | rs11330136  | 21629471 | D,R | 0.7    | 0.9778 | 0.27    | 0.268   | 1.01   | 0.3149 |
| SOX4 | rs139032454 | 21644326 | A,C | 0.9757 | 0.7441 | -13.729 | 13.717  | 1.0018 | 0.3169 |
| SOX4 | rs117061311 | 21683546 | G,A | 0.9853 | 0.4203 | 88.567  | 88.735  | 0.9962 | 0.3182 |
| SOX4 | rs138882930 | 21638300 | A,G | 0.9761 | 0.7432 | -20.944 | 21.187  | 0.9772 | 0.3229 |
| SOX4 | rs35922627  | 21667988 | A,T | 0.973  | 0.7238 | -94.377 | 95.478  | 0.9771 | 0.3229 |
| SOX4 | rs145825998 | 21695945 | T,G | 0.9899 | 0.5601 | 6.716   | 6.81    | 0.9728 | 0.324  |
| SOX4 | rs12183824  | 21726382 | G,A | 0.8184 | 0.3562 | 0.948   | 0.967   | 0.9611 | 0.3269 |
| SOX4 | rs10080752  | 21655608 | C,G | 0.9819 | 0.7225 | -18.784 | 19.186  | 0.9585 | 0.3276 |
| SOX4 | rs201884896 | 21657694 | D,R | 0.9455 | 0.3238 | 0.888   | 0.921   | 0.93   | 0.3349 |
| SOX4 | rs1740830   | 21648615 | C,T | 0.867  | 0.7367 | 0.508   | 0.53    | 0.9213 | 0.3371 |
| SOX4 | rs547687648 | 21729656 | R,I | 0.7892 | 0.8727 | 0.322   | 0.336   | 0.9183 | 0.3379 |
| SOX4 | rs1744860   | 21627046 | A,G | 0.6998 | 0.9875 | 0.256   | 0.268   | 0.9127 | 0.3394 |
| SOX4 | rs1740840   | 21627378 | G,A | 0.7156 | 0.9808 | 0.256   | 0.271   | 0.8979 | 0.3434 |
| SOX4 | rs143636013 | 21649787 | G,C | 0.9413 | 0.7828 | -1.058  | 1.118   | 0.895  | 0.3441 |
| SOX4 | rs7739585   | 21632295 | A,C | 0.6764 | 0.9279 | 0.264   | 0.279   | 0.894  | 0.3444 |
| SOX4 | rs1744857   | 21626067 | T,C | 0.6993 | 0.9886 | 0.253   | 0.268   | 0.8913 | 0.3451 |
| SOX4 | rs1740841   | 21627053 | G,T | 0.6852 | 0.9798 | 0.253   | 0.269   | 0.8902 | 0.3454 |
| SOX4 | rs1744859   | 21626395 | T,C | 0.685  | 0.9803 | 0.252   | 0.269   | 0.8802 | 0.3482 |
| SOX4 | rs1744858   | 21626190 | T,C | 0.6849 | 0.9807 | 0.251   | 0.269   | 0.8742 | 0.3498 |
| SOX4 | rs117804382 | 21656810 | C,T | 0.9855 | 0.5625 | -35.562 | 38.09   | 0.8717 | 0.3505 |
| SOX4 | rs9368326   | 21590104 | A,G | 0.8056 | 0.5535 | 0.405   | 0.436   | 0.865  | 0.3523 |
| SOX4 | rs150235785 | 21638293 | G,A | 0.9849 | 0.7598 | -32.883 | 35.361  | 0.8647 | 0.3524 |
| SOX4 | rs78471563  | 21679073 | T,A | 0.9895 | 0.9404 | -541.87 | 585.054 | 0.8578 | 0.3544 |
| SOX4 | rs1744865   | 21631078 | A,C | 0.6628 | 0.9515 | 0.252   | 0.274   | 0.8509 | 0.3563 |
| SOX4 | rs9350368   | 21562144 | A,G | 0.6823 | 0.3726 | 0.452   | 0.493   | 0.8412 | 0.3591 |
| SOX4 | rs7739607   | 21632345 | G,C | 0.6821 | 0.9067 | 0.262   | 0.286   | 0.84   | 0.3594 |
| SOX4 | rs9348483   | 21687390 | G,T | 0.7953 | 0.87   | 0.332   | 0.363   | 0.8373 | 0.3602 |
| SOX4 | rs2180418   | 21690172 | A,G | 0.8397 | 0.9885 | 0.387   | 0.424   | 0.8318 | 0.3618 |
| SOX4 | rs9358450   | 21740882 | A,G | 0.746  | 0.858  | 0.266   | 0.293   | 0.8264 | 0.3633 |
| SOX4 | rs1744863   | 21629887 | A,G | 0.6612 | 0.9532 | 0.246   | 0.272   | 0.8202 | 0.3651 |

|      |             |          |     |        |        |         |         |        |        |
|------|-------------|----------|-----|--------|--------|---------|---------|--------|--------|
| SOX4 | rs1744862   | 21629881 | C,A | 0.6612 | 0.9531 | 0.246   | 0.272   | 0.8195 | 0.3653 |
| SOX4 | rs80230506  | 21655914 | C,A | 0.9607 | 0.7829 | -1.263  | 1.406   | 0.8075 | 0.3689 |
| SOX4 | rs116104882 | 21654116 | G,C | 0.9607 | 0.7845 | -1.239  | 1.385   | 0.8001 | 0.3711 |
| SOX4 | rs534329540 | 21629251 | R,I | 0.4972 | 0.5784 | -0.308  | 0.349   | 0.7804 | 0.377  |
| SOX4 | rs150997476 | 21663402 | A,T | 0.9893 | 0.6383 | -1.159  | 1.338   | 0.7501 | 0.3865 |
| SOX4 | rs141673420 | 21695454 | T,C | 0.9835 | 0.3745 | -2.651  | 3.069   | 0.7463 | 0.3876 |
| SOX4 | rs9366408   | 21742607 | G,A | 0.9822 | 0.9856 | 192.374 | 222.975 | 0.7444 | 0.3883 |
| SOX4 | rs7742225   | 21685474 | G,A | 0.827  | 0.7132 | 0.424   | 0.493   | 0.7416 | 0.3891 |
| SOX4 | rs75122426  | 21580566 | T,C | 0.985  | 0.6235 | -225.09 | 269.81  | 0.696  | 0.4041 |
| SOX4 | rs1740843   | 21623041 | G,A | 0.6876 | 0.9919 | 0.223   | 0.268   | 0.6918 | 0.4055 |
| SOX4 | rs7741780   | 21685460 | A,G | 0.8336 | 0.732  | 0.4     | 0.483   | 0.6865 | 0.4073 |
| SOX4 | rs62404141  | 21614140 | G,A | 0.8281 | 0.9622 | 0.274   | 0.331   | 0.6853 | 0.4078 |
| SOX4 | rs35528538  | 21613493 | R,D | 0.8281 | 0.9642 | 0.273   | 0.331   | 0.6788 | 0.41   |
| SOX4 | rs113975012 | 21712110 | A,T | 0.9843 | 0.5172 | 6.707   | 8.348   | 0.6455 | 0.4217 |
| SOX4 | rs9358441   | 21565339 | T,C | 0.7025 | 0.3571 | 0.409   | 0.512   | 0.6366 | 0.425  |
| SOX4 | rs1744881   | 21657548 | G,A | 0.8047 | 0.8556 | 0.256   | 0.321   | 0.6361 | 0.4251 |
| SOX4 | rs9466136   | 21653258 | C,T | 0.905  | 0.8569 | -0.443  | 0.556   | 0.6354 | 0.4254 |
| SOX4 | rs78345714  | 21734098 | T,C | 0.9849 | 0.6839 | -0.9    | 1.135   | 0.6292 | 0.4277 |
| SOX4 | rs185847252 | 21676018 | G,A | 0.9496 | 0.8487 | -143.4  | 181.889 | 0.6216 | 0.4305 |
| SOX4 | rs7770799   | 21553258 | A,C | 0.9337 | 0.9722 | 0.399   | 0.509   | 0.6129 | 0.4337 |
| SOX4 | rs116598598 | 21654884 | A,T | 0.983  | 0.5411 | -18.524 | 23.695  | 0.6111 | 0.4344 |
| SOX4 | rs67418443  | 21554442 | C,T | 0.9266 | 0.876  | 0.408   | 0.526   | 0.6012 | 0.4381 |
| SOX4 | rs146516474 | 21554348 | C,T | 0.9266 | 0.8769 | 0.408   | 0.526   | 0.6009 | 0.4382 |
| SOX4 | rs149455365 | 21553549 | R,D | 0.9357 | 0.9431 | 0.405   | 0.523   | 0.5984 | 0.4392 |
| SOX4 | rs7739186   | 21657833 | T,C | 0.9158 | 0.8085 | -0.485  | 0.638   | 0.5772 | 0.4474 |
| SOX4 | rs530398575 | 21733586 | R,I | 0.8629 | 0.4934 | 0.376   | 0.495   | 0.5771 | 0.4475 |
| SOX4 | rs4616978   | 21606129 | G,A | 0.8111 | 0.9353 | 0.25    | 0.335   | 0.5557 | 0.456  |
| SOX4 | rs1740827   | 21650969 | A,T | 0.7378 | 0.9342 | 0.231   | 0.31    | 0.553  | 0.4571 |
| SOX4 | rs143796183 | 21587351 | G,A | 0.9851 | 0.3168 | 3.785   | 5.109   | 0.5489 | 0.4588 |
| SOX4 | rs9460657   | 21660051 | C,T | 0.8938 | 0.8161 | -0.469  | 0.638   | 0.5409 | 0.462  |
| SOX4 | rs116300170 | 21663541 | G,A | 0.9641 | 0.8099 | -1.137  | 1.553   | 0.536  | 0.4641 |
| SOX4 | rs1744851   | 21619810 | T,C | 0.7153 | 0.9819 | 0.2     | 0.275   | 0.5299 | 0.4666 |
| SOX4 | rs11327351  | 21623643 | D,R | 0.6711 | 0.9267 | 0.205   | 0.282   | 0.5292 | 0.4669 |
| SOX4 | rs4327678   | 21619771 | T,C | 0.7132 | 0.9834 | 0.199   | 0.274   | 0.5262 | 0.4682 |
| SOX4 | rs34954830  | 21632488 | R,I | 0.9584 | 0.5469 | -12.843 | 17.718  | 0.5254 | 0.4686 |
| SOX4 | rs562901644 | 21554922 | R,D | 0.9157 | 0.7168 | 0.383   | 0.533   | 0.5171 | 0.4721 |
| SOX4 | rs1740850   | 21618925 | C,G | 0.7147 | 0.9839 | 0.197   | 0.276   | 0.5068 | 0.4765 |
| SOX4 | rs1744850   | 21618916 | G,T | 0.7128 | 0.9828 | 0.196   | 0.276   | 0.5053 | 0.4772 |
| SOX4 | rs57690989  | 21652353 | T,G | 0.9629 | 0.903  | -0.66   | 0.934   | 0.5001 | 0.4795 |
| SOX4 | rs1740828   | 21649085 | A,G | 0.5436 | 0.4642 | 0.312   | 0.442   | 0.4998 | 0.4796 |
| SOX4 | rs6912946   | 21659978 | A,T | 0.8051 | 0.821  | 0.224   | 0.317   | 0.4985 | 0.4802 |
| SOX4 | rs78870816  | 21665363 | C,T | 0.9434 | 0.7804 | -1.043  | 1.48    | 0.4969 | 0.4809 |
| SOX4 | rs146017644 | 21640727 | C,T | 0.9833 | 0.5529 | -10.372 | 14.722  | 0.4964 | 0.4811 |
| SOX4 | rs574039752 | 21629819 | R,D | 0.3639 | 0.9279 | -0.186  | 0.265   | 0.4952 | 0.4816 |
| SOX4 | rs111928481 | 21648542 | T,A | 0.9738 | 0.8848 | -0.784  | 1.115   | 0.4945 | 0.4819 |

|      |             |          |     |        |        |         |         |        |        |
|------|-------------|----------|-----|--------|--------|---------|---------|--------|--------|
| SOX4 | rs1744854   | 21623686 | C,T | 0.6725 | 0.9882 | 0.191   | 0.271   | 0.4942 | 0.4821 |
| SOX4 | rs80264536  | 21666345 | T,G | 0.9437 | 0.7836 | -1.037  | 1.479   | 0.4911 | 0.4834 |
| SOX4 | rs1744853   | 21623386 | A,G | 0.6725 | 0.9887 | 0.19    | 0.271   | 0.4892 | 0.4843 |
| SOX4 | rs1740842   | 21623181 | G,A | 0.6726 | 0.9885 | 0.189   | 0.271   | 0.4867 | 0.4854 |
| SOX4 | rs76062205  | 21666427 | C,T | 0.9438 | 0.7852 | -1.033  | 1.481   | 0.4861 | 0.4857 |
| SOX4 | rs1744847   | 21695888 | C,T | 0.9409 | 0.4743 | -0.664  | 0.959   | 0.4799 | 0.4885 |
| SOX4 | rs7751397   | 21662535 | C,T | 0.9285 | 0.8402 | -0.443  | 0.644   | 0.4747 | 0.4908 |
| SOX4 | rs4710983   | 21734202 | C,T | 0.767  | 0.9462 | 0.192   | 0.279   | 0.4746 | 0.4909 |
| SOX4 | rs2759360   | 21653532 | A,G | 0.7648 | 0.8809 | 0.217   | 0.317   | 0.4693 | 0.4933 |
| SOX4 | rs7771671   | 21662524 | T,G | 0.9284 | 0.8382 | -0.44   | 0.643   | 0.468  | 0.4939 |
| SOX4 | rs1740844   | 21622871 | C,T | 0.6724 | 0.9911 | 0.185   | 0.271   | 0.4675 | 0.4941 |
| SOX4 | rs61661762  | 21588463 | A,G | 0.9883 | 0.3149 | -1.037  | 1.519   | 0.4662 | 0.4947 |
| SOX4 | rs1555529   | 21691704 | A,G | 0.7822 | 0.9942 | 0.241   | 0.355   | 0.4617 | 0.4968 |
| SOX4 | rs6939472   | 21661019 | G,C | 0.7866 | 0.7792 | 0.214   | 0.315   | 0.4598 | 0.4977 |
| SOX4 | rs6941630   | 21679102 | C,T | 0.5039 | 0.9783 | 0.175   | 0.258   | 0.4597 | 0.4978 |
| SOX4 | rs1744891   | 21679835 | G,A | 0.5058 | 0.9872 | 0.175   | 0.258   | 0.459  | 0.4981 |
| SOX4 | rs1744892   | 21680206 | A,G | 0.4953 | 0.9943 | 0.175   | 0.258   | 0.4588 | 0.4982 |
| SOX4 | rs1744895   | 21680899 | G,C | 0.4958 | 1      | 0.175   | 0.258   | 0.4586 | 0.4983 |
| SOX4 | rs6456440   | 21658236 | C,A | 0.9344 | 0.7776 | -0.726  | 1.072   | 0.4582 | 0.4985 |
| SOX4 | rs111355896 | 21649454 | I,R | 0.7486 | 0.9074 | 0.209   | 0.31    | 0.4558 | 0.4996 |
| SOX4 | rs1740865   | 21668071 | C,A | 0.5314 | 0.8949 | 0.182   | 0.269   | 0.4558 | 0.4996 |
| SOX4 | rs1740861   | 21678006 | T,C | 0.5038 | 0.9738 | 0.175   | 0.259   | 0.4553 | 0.4998 |
| SOX4 | rs1744886   | 21671092 | A,T | 0.5151 | 0.9725 | 0.174   | 0.259   | 0.4531 | 0.5009 |
| SOX4 | rs77518511  | 21690391 | A,G | 0.9839 | 0.4553 | 14.767  | 21.995  | 0.4507 | 0.502  |
| SOX4 | rs2328627   | 21714362 | G,A | 0.9889 | 0.782  | 292.951 | 438.659 | 0.446  | 0.5042 |
| SOX4 | rs116697959 | 21668594 | A,T | 0.9652 | 0.8312 | -1.043  | 1.563   | 0.4455 | 0.5045 |
| SOX4 | rs113989215 | 21665766 | A,C | 0.9131 | 0.855  | -0.38   | 0.57    | 0.4442 | 0.5051 |
| SOX4 | rs77155105  | 21682861 | C,G | 0.9671 | 0.7117 | -1.245  | 1.868   | 0.4441 | 0.5052 |
| SOX4 | rs1744894   | 21680886 | T,C | 0.4962 | 0.9953 | 0.173   | 0.259   | 0.4437 | 0.5053 |
| SOX4 | rs72317305  | 21669872 | R,D | 0.5156 | 0.9662 | 0.173   | 0.26    | 0.4434 | 0.5055 |
| SOX4 | rs1744861   | 21627986 | A,T | 0.3793 | 0.9676 | -0.174  | 0.262   | 0.4424 | 0.5059 |
| SOX4 | rs34987769  | 21678839 | R,I | 0.5043 | 0.9785 | 0.173   | 0.26    | 0.4416 | 0.5063 |
| SOX4 | rs9348480   | 21617782 | G,A | 0.7922 | 0.9408 | 0.217   | 0.327   | 0.4404 | 0.5069 |
| SOX4 | rs1744893   | 21680746 | T,C | 0.5019 | 0.987  | 0.172   | 0.26    | 0.4398 | 0.5072 |
| SOX4 | rs1740855   | 21680782 | C,T | 0.5021 | 0.9879 | 0.171   | 0.26    | 0.4351 | 0.5095 |
| SOX4 | rs1740825   | 21653689 | T,C | 0.7477 | 0.8767 | 0.203   | 0.308   | 0.4328 | 0.5106 |
| SOX4 | rs9460651   | 21622531 | G,T | 0.672  | 0.9951 | 0.178   | 0.27    | 0.4326 | 0.5107 |
| SOX4 | rs9368325   | 21577508 | C,T | 0.8604 | 0.347  | 0.437   | 0.665   | 0.4321 | 0.511  |
| SOX4 | rs145907846 | 21729085 | G,A | 0.9868 | 0.8724 | 66.156  | 100.721 | 0.4314 | 0.5113 |
| SOX4 | rs78098947  | 21713740 | C,T | 0.989  | 0.7788 | 221.684 | 339.417 | 0.4266 | 0.5137 |
| SOX4 | rs140643662 | 21664544 | G,A | 0.9855 | 0.5752 | -71.307 | 109.223 | 0.4262 | 0.5138 |
| SOX4 | rs7751661   | 21621850 | G,A | 0.6705 | 1      | 0.176   | 0.27    | 0.4257 | 0.5141 |
| SOX4 | rs111442391 | 21730723 | C,T | 0.9726 | 0.3086 | -0.843  | 1.294   | 0.4249 | 0.5145 |
| SOX4 | rs76501983  | 21631411 | G,A | 0.9854 | 0.8228 | -0.721  | 1.114   | 0.4187 | 0.5176 |
| SOX4 | rs76934110  | 21669629 | G,A | 0.9626 | 0.7982 | -1.008  | 1.562   | 0.4168 | 0.5186 |

|      |             |          |     |        |        |         |         |        |        |
|------|-------------|----------|-----|--------|--------|---------|---------|--------|--------|
| SOX4 | rs557872691 | 21603474 | R,D | 0.8825 | 0.5572 | -0.538  | 0.836   | 0.414  | 0.52   |
| SOX4 | rs71563995  | 21676342 | A,G | 0.9697 | 0.7188 | 135.299 | 210.419 | 0.4134 | 0.5202 |
| SOX4 | rs12664833  | 21614978 | T,G | 0.8033 | 0.9552 | 0.211   | 0.329   | 0.4119 | 0.521  |
| SOX4 | rs1744896   | 21681103 | A,G | 0.5038 | 0.9407 | 0.171   | 0.266   | 0.4098 | 0.5221 |
| SOX4 | rs4712625   | 21699342 | G,A | 0.8761 | 0.9937 | -0.257  | 0.402   | 0.4098 | 0.5221 |
| SOX4 | rs1740851   | 21616268 | T,C | 0.7152 | 0.9852 | 0.179   | 0.279   | 0.4096 | 0.5222 |
| SOX4 | rs1740856   | 21681223 | G,A | 0.5041 | 0.9379 | 0.171   | 0.267   | 0.4093 | 0.5223 |
| SOX4 | rs138585583 | 21678890 | R,D | 0.8749 | 0.9014 | -0.365  | 0.57    | 0.4085 | 0.5227 |
| SOX4 | rs74492370  | 21679606 | G,A | 0.9678 | 0.8228 | -0.997  | 1.563   | 0.407  | 0.5235 |
| SOX4 | rs78971333  | 21679601 | C,T | 0.9678 | 0.8229 | -0.997  | 1.563   | 0.407  | 0.5235 |
| SOX4 | rs73737568  | 21667546 | A,G | 0.9719 | 0.8789 | -0.7    | 1.098   | 0.4064 | 0.5238 |
| SOX4 | rs190176895 | 21629550 | C,A | 0.9877 | 0.7487 | -0.74   | 1.161   | 0.4063 | 0.5239 |
| SOX4 | rs6934807   | 21653677 | A,G | 0.9709 | 0.9814 | -0.705  | 1.108   | 0.4048 | 0.5246 |
| SOX4 | rs75509154  | 21670162 | A,G | 0.9656 | 0.8408 | -0.995  | 1.563   | 0.4048 | 0.5246 |
| SOX4 | rs112538002 | 21611751 | T,C | 0.9848 | 0.97   | -0.704  | 1.108   | 0.4039 | 0.5251 |
| SOX4 | rs117971178 | 21674146 | C,T | 0.9852 | 0.5427 | -703.95 | 1107.93 | 0.4037 | 0.5252 |
| SOX4 | rs145952396 | 21677173 | C,T | 0.9854 | 0.5637 | -175.99 | 276.983 | 0.4037 | 0.5252 |
| SOX4 | rs147045541 | 21675767 | C,T | 0.9834 | 0.576  | -703.95 | 1107.93 | 0.4037 | 0.5252 |
| SOX4 | rs9295516   | 21673560 | C,T | 0.9483 | 0.8605 | -234.65 | 369.311 | 0.4037 | 0.5252 |
| SOX4 | rs9466126   | 21601762 | A,C | 0.9836 | 0.9467 | -703.95 | 1107.93 | 0.4037 | 0.5252 |
| SOX4 | rs9466127   | 21602745 | G,A | 0.9739 | 0.9906 | -703.95 | 1107.93 | 0.4037 | 0.5252 |
| SOX4 | rs73374488  | 21666188 | G,A | 0.9707 | 0.8902 | -0.698  | 1.098   | 0.4036 | 0.5253 |
| SOX4 | rs111228858 | 21612309 | G,A | 0.9872 | 0.8945 | -0.734  | 1.155   | 0.4032 | 0.5254 |
| SOX4 | rs58572340  | 21555505 | T,A | 0.8729 | 0.5846 | 0.329   | 0.517   | 0.4032 | 0.5254 |
| SOX4 | rs78923341  | 21612472 | A,C | 0.9872 | 0.895  | -0.734  | 1.155   | 0.4032 | 0.5254 |
| SOX4 | rs75157802  | 21678178 | A,G | 0.9675 | 0.834  | -0.968  | 1.525   | 0.4031 | 0.5255 |
| SOX4 | rs111411936 | 21626246 | G,A | 0.9877 | 0.7672 | -0.736  | 1.159   | 0.403  | 0.5256 |
| SOX4 | rs113842280 | 21611571 | T,G | 0.9848 | 0.967  | -0.704  | 1.108   | 0.403  | 0.5256 |
| SOX4 | rs112650104 | 21611568 | C,G | 0.9871 | 0.889  | -0.734  | 1.157   | 0.4023 | 0.5259 |
| SOX4 | rs6933506   | 21673857 | T,C | 0.9717 | 0.871  | -0.689  | 1.086   | 0.4021 | 0.526  |
| SOX4 | rs142641808 | 21677158 | C,T | 0.9656 | 0.7625 | -0.962  | 1.518   | 0.4013 | 0.5264 |
| SOX4 | rs6941897   | 21671979 | C,A | 0.9897 | 0.6097 | -0.776  | 1.226   | 0.4011 | 0.5265 |
| SOX4 | rs7762989   | 21624153 | C,T | 0.9883 | 0.8214 | -0.734  | 1.159   | 0.401  | 0.5266 |
| SOX4 | rs12374633  | 21654974 | G,A | 0.9698 | 0.9337 | -0.703  | 1.11    | 0.4006 | 0.5268 |
| SOX4 | rs59187080  | 21668625 | G,A | 0.966  | 0.7875 | -0.581  | 0.917   | 0.4006 | 0.5268 |
| SOX4 | rs112102336 | 21677692 | G,T | 0.9639 | 0.7866 | -0.954  | 1.509   | 0.4002 | 0.527  |
| SOX4 | rs147488932 | 21672276 | G,A | 0.9657 | 0.8442 | -0.985  | 1.563   | 0.3971 | 0.5286 |
| SOX4 | rs79169915  | 21607457 | G,A | 0.9882 | 0.848  | -0.733  | 1.164   | 0.3967 | 0.5288 |
| SOX4 | rs111412021 | 21606278 | T,C | 0.9882 | 0.8163 | -0.729  | 1.159   | 0.3958 | 0.5292 |
| SOX4 | rs34197291  | 21611277 | R,D | 0.7729 | 0.7368 | 0.224   | 0.356   | 0.3952 | 0.5296 |
| SOX4 | rs71657670  | 21613526 | R,D | 0.9864 | 0.77   | -0.727  | 1.157   | 0.3944 | 0.53   |
| SOX4 | rs7754895   | 21696533 | T,C | 0.9459 | 0.5325 | 1.154   | 1.84    | 0.3933 | 0.5306 |
| SOX4 | rs543173991 | 21629474 | T,A | 0.9884 | 0.7664 | -0.8    | 1.277   | 0.3929 | 0.5308 |
| SOX4 | rs77222012  | 21614945 | G,A | 0.9849 | 0.9755 | -0.693  | 1.108   | 0.3911 | 0.5317 |
| SOX4 | rs10557323  | 21615430 | R,D | 0.9849 | 0.974  | -0.693  | 1.108   | 0.391  | 0.5318 |

|      |             |          |     |        |        |         |         |        |        |
|------|-------------|----------|-----|--------|--------|---------|---------|--------|--------|
| SOX4 | rs7763048   | 21681780 | G,A | 0.4974 | 0.8635 | 0.173   | 0.277   | 0.3909 | 0.5318 |
| SOX4 | rs112553613 | 21616239 | A,G | 0.9848 | 0.9676 | -0.692  | 1.108   | 0.3897 | 0.5325 |
| SOX4 | rs7772692   | 21696544 | A,G | 0.9472 | 0.5318 | 1.156   | 1.853   | 0.3892 | 0.5327 |
| SOX4 | rs6935968   | 21613156 | G,A | 0.9849 | 0.9776 | -0.691  | 1.108   | 0.3889 | 0.5329 |
| SOX4 | rs75127321  | 21613946 | G,A | 0.9849 | 0.9767 | -0.691  | 1.108   | 0.3889 | 0.5329 |
| SOX4 | rs111887738 | 21616944 | T,C | 0.9828 | 0.9369 | -0.689  | 1.109   | 0.3862 | 0.5343 |
| SOX4 | rs113455272 | 21616778 | T,C | 0.9824 | 0.9392 | -0.689  | 1.109   | 0.3859 | 0.5344 |
| SOX4 | rs2251647   | 21677746 | C,A | 0.9512 | 0.9786 | -0.335  | 0.54    | 0.3859 | 0.5345 |
| SOX4 | rs116187696 | 21639646 | G,A | 0.9868 | 0.5351 | -10.798 | 17.443  | 0.3832 | 0.5359 |
| SOX4 | rs1740845   | 21621731 | G,A | 0.6871 | 0.9929 | 0.168   | 0.274   | 0.3771 | 0.5392 |
| SOX4 | rs149019701 | 21621670 | D,R | 0.6874 | 0.9939 | 0.168   | 0.274   | 0.3767 | 0.5394 |
| SOX4 | rs1744852   | 21621724 | A,G | 0.6871 | 0.9927 | 0.168   | 0.274   | 0.3757 | 0.5399 |
| SOX4 | rs542285387 | 21621459 | I,R | 0.6862 | 0.9884 | 0.168   | 0.275   | 0.3721 | 0.5419 |
| SOX4 | rs183503583 | 21638847 | G,A | 0.9885 | 0.5492 | -11.972 | 19.687  | 0.3698 | 0.5431 |
| SOX4 | rs147268567 | 21621169 | D,R | 0.6874 | 0.993  | 0.167   | 0.275   | 0.368  | 0.5441 |
| SOX4 | rs546083928 | 21596246 | R,I | 0.9877 | 0.6818 | -0.702  | 1.158   | 0.3674 | 0.5444 |
| SOX4 | rs1740857   | 21681617 | T,G | 0.5067 | 0.8693 | 0.168   | 0.278   | 0.3673 | 0.5445 |
| SOX4 | rs2759362   | 21681885 | G,A | 0.5173 | 0.8653 | 0.169   | 0.279   | 0.3659 | 0.5452 |
| SOX4 | rs79164129  | 21601917 | T,C | 0.9855 | 0.3283 | 1.11    | 1.84    | 0.3637 | 0.5465 |
| SOX4 | rs1740858   | 21682180 | C,T | 0.507  | 0.8636 | 0.168   | 0.279   | 0.3633 | 0.5467 |
| SOX4 | rs1740859   | 21682298 | C,T | 0.5072 | 0.8627 | 0.168   | 0.279   | 0.3633 | 0.5467 |
| SOX4 | rs1740846   | 21621045 | A,G | 0.6874 | 0.9924 | 0.165   | 0.275   | 0.3615 | 0.5477 |
| SOX4 | rs7754702   | 21696403 | T,C | 0.9482 | 0.5267 | 1.121   | 1.865   | 0.3613 | 0.5478 |
| SOX4 | rs185494084 | 21636537 | T,C | 0.9884 | 0.4475 | -0.947  | 1.577   | 0.3607 | 0.5481 |
| SOX4 | rs12200574  | 21683353 | G,A | 0.5092 | 0.842  | 0.169   | 0.282   | 0.3597 | 0.5487 |
| SOX4 | rs9368333   | 21743631 | A,C | 0.9748 | 0.5254 | 44.789  | 74.785  | 0.3587 | 0.5492 |
| SOX4 | rs1740847   | 21620469 | C,A | 0.6882 | 0.9889 | 0.165   | 0.276   | 0.3584 | 0.5494 |
| SOX4 | rs1740848   | 21620293 | G,A | 0.6882 | 0.9886 | 0.165   | 0.276   | 0.355  | 0.5513 |
| SOX4 | rs77273443  | 21620705 | G,A | 0.984  | 0.938  | -59.175 | 99.704  | 0.3522 | 0.5528 |
| SOX4 | rs56050802  | 21555539 | C,T | 0.8664 | 0.6128 | 0.276   | 0.466   | 0.3512 | 0.5534 |
| SOX4 | rs9466144   | 21676886 | G,T | 0.943  | 0.852  | 51.585  | 87.252  | 0.3495 | 0.5544 |
| SOX4 | rs138387168 | 21716280 | C,T | 0.9765 | 0.7359 | 9.258   | 15.72   | 0.3468 | 0.5559 |
| SOX4 | rs201453060 | 21648925 | R,I | 0.5221 | 0.4872 | -0.25   | 0.425   | 0.346  | 0.5564 |
| SOX4 | rs1740826   | 21651528 | G,A | 0.6892 | 0.9762 | 0.165   | 0.281   | 0.3431 | 0.5581 |
| SOX4 | rs1744877   | 21651554 | T,C | 0.6891 | 0.9768 | 0.164   | 0.281   | 0.3415 | 0.559  |
| SOX4 | rs116878740 | 21665291 | A,G | 0.9855 | 0.5757 | -69.761 | 119.424 | 0.3412 | 0.5591 |
| SOX4 | rs9466141   | 21673993 | C,T | 0.9236 | 0.9976 | -206.21 | 354.041 | 0.3392 | 0.5603 |
| SOX4 | rs113889001 | 21695381 | A,C | 0.9496 | 0.5091 | 1.238   | 2.143   | 0.3336 | 0.5636 |
| SOX4 | rs36093392  | 21601725 | D,R | 0.7127 | 0.8142 | 0.193   | 0.334   | 0.333  | 0.5639 |
| SOX4 | rs112101248 | 21683625 | T,C | 0.9893 | 0.5442 | 29.832  | 52.057  | 0.3284 | 0.5666 |
| SOX4 | rs2749681   | 21683792 | A,G | 0.5085 | 0.771  | 0.169   | 0.295   | 0.3263 | 0.5678 |
| SOX4 | rs35857450  | 21622415 | D,R | 0.6703 | 0.8902 | 0.166   | 0.29    | 0.3263 | 0.5679 |
| SOX4 | rs2876599   | 21714103 | C,G | 0.9889 | 0.7808 | 161.775 | 284.437 | 0.3235 | 0.5695 |
| SOX4 | rs1740832   | 21646725 | A,G | 0.756  | 0.938  | 0.173   | 0.305   | 0.322  | 0.5704 |
| SOX4 | rs189742413 | 21683505 | C,T | 0.984  | 0.4632 | -1.002  | 1.767   | 0.322  | 0.5704 |

|      |             |          |     |        |        |         |        |        |        |
|------|-------------|----------|-----|--------|--------|---------|--------|--------|--------|
| SOX4 | rs13219086  | 21683929 | G,C | 0.5137 | 0.7654 | 0.167   | 0.296  | 0.3176 | 0.573  |
| SOX4 | rs13215657  | 21683714 | C,T | 0.511  | 0.7765 | 0.166   | 0.294  | 0.3175 | 0.5731 |
| SOX4 | rs35612989  | 21663201 | R,I | 0.4311 | 0.4511 | -0.214  | 0.38   | 0.317  | 0.5734 |
| SOX4 | rs1744875   | 21648534 | C,A | 0.4998 | 0.4732 | -0.238  | 0.423  | 0.3166 | 0.5736 |
| SOX4 | rs141900910 | 21647244 | C,T | 0.9864 | 0.543  | -7.016  | 12.491 | 0.3155 | 0.5743 |
| SOX4 | rs1744849   | 21612949 | A,G | 0.7238 | 1      | 0.158   | 0.282  | 0.3133 | 0.5757 |
| SOX4 | rs1615194   | 21648442 | T,C | 0.7437 | 0.9296 | 0.17    | 0.308  | 0.3073 | 0.5793 |
| SOX4 | rs36027263  | 21648358 | I,R | 0.7129 | 0.8819 | 0.172   | 0.312  | 0.3048 | 0.5809 |
| SOX4 | rs1744855   | 21623715 | G,A | 0.3803 | 0.9708 | -0.145  | 0.264  | 0.3047 | 0.581  |
| SOX4 | rs117537289 | 21661595 | C,T | 0.9854 | 0.5671 | -41.866 | 76.087 | 0.3028 | 0.5822 |
| SOX4 | rs116216476 | 21700308 | T,C | 0.9886 | 0.6467 | -4.37   | 7.958  | 0.3016 | 0.5829 |
| SOX4 | rs1744890   | 21678059 | A,G | 0.8017 | 0.7924 | 0.161   | 0.298  | 0.2904 | 0.59   |
| SOX4 | rs1740853   | 21684065 | G,A | 0.5152 | 0.7328 | 0.163   | 0.303  | 0.2895 | 0.5906 |
| SOX4 | rs1740834   | 21645207 | C,T | 0.7742 | 0.9378 | 0.164   | 0.307  | 0.2853 | 0.5932 |
| SOX4 | rs1744870   | 21638485 | A,C | 0.734  | 0.9006 | 0.166   | 0.312  | 0.2839 | 0.5942 |
| SOX4 | rs10946462  | 21651830 | C,T | 0.6894 | 0.9828 | 0.149   | 0.28   | 0.2826 | 0.595  |
| SOX4 | rs7775517   | 21699901 | T,G | 0.9389 | 0.6039 | 0.729   | 1.372  | 0.2821 | 0.5953 |
| SOX4 | rs1740831   | 21647589 | G,A | 0.7131 | 0.9772 | 0.159   | 0.3    | 0.282  | 0.5954 |
| SOX4 | rs7755254   | 21699892 | C,T | 0.9389 | 0.6037 | 0.729   | 1.374  | 0.2811 | 0.596  |
| SOX4 | rs1744867   | 21634171 | T,C | 0.7381 | 0.8918 | 0.167   | 0.314  | 0.2809 | 0.5961 |
| SOX4 | rs528217121 | 21702677 | R,D | 0.9888 | 0.6785 | -6.2    | 11.755 | 0.2782 | 0.5979 |
| SOX4 | rs66647983  | 21633079 | R,D | 0.5368 | 0.3749 | -0.226  | 0.428  | 0.2772 | 0.5986 |
| SOX4 | rs36024930  | 21605537 | R,D | 0.7795 | 0.8154 | 0.183   | 0.349  | 0.2744 | 0.6004 |
| SOX4 | rs558880181 | 21699974 | R,D | 0.9241 | 0.5575 | 0.71    | 1.356  | 0.2743 | 0.6005 |
| SOX4 | rs79381952  | 21699489 | T,C | 0.9398 | 0.6026 | 0.729   | 1.394  | 0.2733 | 0.6011 |
| SOX4 | rs1744874   | 21640902 | T,C | 0.7492 | 0.9047 | 0.163   | 0.312  | 0.2718 | 0.6021 |
| SOX4 | rs149699118 | 21633666 | D,R | 0.7515 | 0.8935 | 0.164   | 0.315  | 0.2699 | 0.6034 |
| SOX4 | rs1744871   | 21638566 | C,T | 0.7505 | 0.8974 | 0.163   | 0.314  | 0.2691 | 0.6039 |
| SOX4 | rs1744872   | 21638599 | C,T | 0.7505 | 0.8975 | 0.163   | 0.314  | 0.2692 | 0.6039 |
| SOX4 | rs1744873   | 21638871 | C,T | 0.7506 | 0.8981 | 0.163   | 0.313  | 0.269  | 0.604  |
| SOX4 | rs117538721 | 21647180 | T,C | 0.986  | 0.5245 | -6.292  | 12.17  | 0.2673 | 0.6052 |
| SOX4 | rs2749683   | 21635327 | T,G | 0.767  | 0.8784 | 0.166   | 0.321  | 0.2665 | 0.6057 |
| SOX4 | rs1740860   | 21678055 | T,C | 0.7991 | 0.7824 | 0.154   | 0.298  | 0.2663 | 0.6058 |
| SOX4 | rs397888201 | 21681363 | R,D | 0.4982 | 0.7168 | 0.159   | 0.308  | 0.2663 | 0.6058 |
| SOX4 | rs7738506   | 21702690 | A,T | 0.9888 | 0.6716 | -6.075  | 11.827 | 0.2638 | 0.6075 |
| SOX4 | rs1740835   | 21637725 | G,A | 0.7724 | 0.8961 | 0.162   | 0.316  | 0.2629 | 0.6081 |
| SOX4 | rs76475505  | 21611890 | T,G | 0.9837 | 0.9609 | -75.559 | 147.33 | 0.263  | 0.6081 |
| SOX4 | rs9466129   | 21610137 | C,G | 0.9838 | 0.9565 | -75.559 | 147.33 | 0.263  | 0.6081 |
| SOX4 | rs9295514   | 21636585 | A,G | 0.7107 | 0.9234 | 0.159   | 0.311  | 0.2606 | 0.6097 |
| SOX4 | rs13219202  | 21683982 | G,A | 0.5273 | 0.7259 | 0.159   | 0.313  | 0.2591 | 0.6108 |
| SOX4 | rs35001920  | 21676726 | R,D | 0.4775 | 0.9497 | 0.135   | 0.265  | 0.2586 | 0.6111 |
| SOX4 | rs140423760 | 21646093 | C,A | 0.9884 | 0.552  | -7.412  | 14.653 | 0.2558 | 0.613  |
| SOX4 | rs76944255  | 21582643 | G,A | 0.981  | 0.4687 | -0.587  | 1.161  | 0.2555 | 0.6132 |
| SOX4 | rs5874825   | 21634749 | I,R | 0.7699 | 0.8924 | 0.159   | 0.317  | 0.2532 | 0.6148 |
| SOX4 | rs1740836   | 21634644 | G,A | 0.7705 | 0.8935 | 0.159   | 0.317  | 0.2513 | 0.6161 |



|      |             |          |     |        |        |         |         |        |        |
|------|-------------|----------|-----|--------|--------|---------|---------|--------|--------|
| SOX4 | rs79337490  | 21695025 | T,C | 0.9508 | 0.5151 | 1.094   | 2.188   | 0.2502 | 0.617  |
| SOX4 | rs111405274 | 21694954 | A,G | 0.9508 | 0.5151 | 1.095   | 2.192   | 0.2495 | 0.6174 |
| SOX4 | rs77354845  | 21621783 | A,G | 0.9841 | 0.9371 | -45.746 | 91.574  | 0.2496 | 0.6174 |
| SOX4 | rs7756206   | 21635314 | T,G | 0.7423 | 0.8724 | 0.159   | 0.319   | 0.2483 | 0.6183 |
| SOX4 | rs2749682   | 21641716 | A,G | 0.6939 | 0.947  | 0.151   | 0.305   | 0.2438 | 0.6215 |
| SOX4 | rs571632729 | 21726382 | R,I | 0.896  | 0.3926 | -0.521  | 1.055   | 0.2434 | 0.6217 |
| SOX4 | rs144178641 | 21622568 | C,T | 0.984  | 0.926  | -45.125 | 91.585  | 0.2428 | 0.6222 |
| SOX4 | rs80061387  | 21579793 | T,C | 0.9808 | 0.4585 | -0.569  | 1.163   | 0.2395 | 0.6245 |
| SOX4 | rs6456439   | 21645743 | T,G | 0.7125 | 0.9939 | 0.145   | 0.297   | 0.2384 | 0.6253 |
| SOX4 | rs60048426  | 21556513 | G,A | 0.947  | 0.5576 | 0.398   | 0.828   | 0.2308 | 0.6309 |
| SOX4 | rs548873349 | 21736947 | R,I | 0.8405 | 0.7508 | -0.285  | 0.594   | 0.2301 | 0.6315 |
| SOX4 | rs9466153   | 21700048 | C,T | 0.9445 | 0.5887 | 0.706   | 1.481   | 0.2275 | 0.6334 |
| SOX4 | rs112243204 | 21582142 | T,C | 0.9498 | 0.5703 | -0.284  | 0.597   | 0.2263 | 0.6343 |
| SOX4 | rs112103466 | 21699063 | T,C | 0.9395 | 0.5894 | 0.703   | 1.485   | 0.2239 | 0.6361 |
| SOX4 | rs114750919 | 21725361 | C,G | 0.9867 | 0.8444 | -235.26 | 497.2   | 0.2239 | 0.6361 |
| SOX4 | rs112047759 | 21699028 | T,C | 0.9395 | 0.5892 | 0.701   | 1.487   | 0.2222 | 0.6374 |
| SOX4 | rs58699714  | 21698897 | C,T | 0.9395 | 0.5888 | 0.7     | 1.491   | 0.2206 | 0.6386 |
| SOX4 | rs76401928  | 21586715 | G,A | 0.9419 | 0.6097 | -0.273  | 0.584   | 0.2186 | 0.6401 |
| SOX4 | rs150071402 | 21610552 | G,A | 0.9896 | 0.5952 | -15.448 | 33.101  | 0.2178 | 0.6407 |
| SOX4 | rs9366406   | 21617668 | T,A | 0.7397 | 0.9296 | 0.141   | 0.302   | 0.2175 | 0.641  |
| SOX4 | rs111503674 | 21585461 | T,C | 0.941  | 0.5927 | -0.273  | 0.587   | 0.2166 | 0.6416 |
| SOX4 | rs75228175  | 21579117 | C,T | 0.9479 | 0.5358 | -0.28   | 0.606   | 0.2142 | 0.6435 |
| SOX4 | rs77401992  | 21579608 | A,G | 0.9474 | 0.5364 | -0.278  | 0.602   | 0.2142 | 0.6435 |
| SOX4 | rs7746995   | 21686064 | G,A | 0.9859 | 0.4629 | 13.276  | 29.016  | 0.2094 | 0.6473 |
| SOX4 | rs79521243  | 21581049 | T,C | 0.9405 | 0.5684 | -0.271  | 0.594   | 0.2078 | 0.6485 |
| SOX4 | rs1740852   | 21608979 | T,C | 0.895  | 0.9932 | -0.227  | 0.499   | 0.2072 | 0.649  |
| SOX4 | rs60309622  | 21698465 | C,T | 0.9414 | 0.5673 | 0.697   | 1.534   | 0.2063 | 0.6497 |
| SOX4 | rs138691949 | 21653247 | A,T | 0.9812 | 0.5466 | -6.843  | 15.201  | 0.2026 | 0.6526 |
| SOX4 | rs6456437   | 21615443 | T,C | 0.7388 | 0.9506 | 0.135   | 0.302   | 0.1991 | 0.6554 |
| SOX4 | rs1740867   | 21663105 | C,T | 0.7594 | 0.7883 | 0.137   | 0.308   | 0.1983 | 0.6561 |
| SOX4 | rs16885175  | 21726770 | A,G | 0.8585 | 0.8892 | -0.296  | 0.67    | 0.1959 | 0.658  |
| SOX4 | rs6929483   | 21698094 | T,C | 0.9394 | 0.583  | 0.679   | 1.54    | 0.1946 | 0.6591 |
| SOX4 | rs6929294   | 21698041 | T,G | 0.9394 | 0.5831 | 0.681   | 1.544   | 0.1945 | 0.6592 |
| SOX4 | rs1740866   | 21664729 | T,G | 0.7801 | 0.807  | 0.136   | 0.311   | 0.1925 | 0.6609 |
| SOX4 | rs6456443   | 21716233 | G,A | 0.9818 | 0.9202 | 114.313 | 261.393 | 0.1913 | 0.6619 |
| SOX4 | rs116342166 | 21630548 | T,C | 0.9891 | 0.5558 | -15.322 | 35.06   | 0.191  | 0.6621 |
| SOX4 | rs1744884   | 21663449 | G,A | 0.7593 | 0.786  | 0.134   | 0.307   | 0.1906 | 0.6624 |
| SOX4 | rs1740838   | 21632759 | G,T | 0.3851 | 0.7571 | -0.133  | 0.306   | 0.1905 | 0.6625 |
| SOX4 | rs201389513 | 21635326 | D,R | 0.7672 | 0.8696 | 0.137   | 0.315   | 0.1891 | 0.6636 |
| SOX4 | rs1744879   | 21652741 | A,G | 0.6892 | 0.9997 | 0.12    | 0.277   | 0.1891 | 0.6637 |
| SOX4 | rs60908846  | 21646239 | I,R | 0.758  | 0.8675 | 0.13    | 0.3     | 0.1889 | 0.6639 |
| SOX4 | rs11757166  | 21652990 | C,T | 0.6883 | 0.9879 | 0.12    | 0.278   | 0.1862 | 0.6661 |
| SOX4 | rs11284636  | 21591706 | R,D | 0.9858 | 0.4225 | -9.57   | 22.195  | 0.1859 | 0.6663 |
| SOX4 | rs1744880   | 21653046 | A,G | 0.6868 | 0.9845 | 0.12    | 0.278   | 0.185  | 0.6671 |
| SOX4 | rs1740849   | 21619809 | G,A | 0.3637 | 0.9622 | -0.115  | 0.27    | 0.1821 | 0.6696 |

|      |             |          |     |        |        |         |         |        |        |
|------|-------------|----------|-----|--------|--------|---------|---------|--------|--------|
| SOX4 | rs78474141  | 21604475 | G,T | 0.9839 | 0.9516 | -133.11 | 312.296 | 0.1817 | 0.6699 |
| SOX4 | rs59493338  | 21646242 | T,A | 0.701  | 0.8468 | 0.132   | 0.311   | 0.1798 | 0.6716 |
| SOX4 | rs112653724 | 21576915 | G,A | 0.9388 | 0.5234 | -0.258  | 0.612   | 0.1782 | 0.6729 |
| SOX4 | rs1620996   | 21602552 | C,T | 0.8959 | 0.8139 | -0.234  | 0.555   | 0.1775 | 0.6735 |
| SOX4 | rs7744188   | 21694601 | T,C | 0.9149 | 0.6416 | 0.593   | 1.413   | 0.1761 | 0.6747 |
| SOX4 | rs112617138 | 21576898 | A,G | 0.938  | 0.5193 | -0.255  | 0.609   | 0.1752 | 0.6755 |
| SOX4 | rs68015368  | 21645499 | I,R | 0.8315 | 0.7435 | 0.157   | 0.376   | 0.1751 | 0.6756 |
| SOX4 | rs113196987 | 21575419 | A,G | 0.9232 | 0.5162 | -0.249  | 0.609   | 0.1665 | 0.6833 |
| SOX4 | rs112837708 | 21696451 | G,A | 0.9648 | 0.4436 | 1.225   | 3.018   | 0.1647 | 0.6849 |
| SOX4 | rs9460658   | 21684193 | C,T | 0.9792 | 0.347  | 1.039   | 2.559   | 0.1647 | 0.6849 |
| SOX4 | rs11965374  | 21629739 | T,G | 0.9653 | 0.7623 | -0.331  | 0.824   | 0.1615 | 0.6878 |
| SOX4 | rs146150526 | 21575243 | T,C | 0.9263 | 0.5346 | -0.245  | 0.612   | 0.16   | 0.6891 |
| SOX4 | rs6921422   | 21600523 | C,A | 0.9308 | 0.9908 | -0.318  | 0.798   | 0.1584 | 0.6906 |
| SOX4 | rs9466124   | 21599700 | A,G | 0.9309 | 0.9964 | -0.316  | 0.797   | 0.1576 | 0.6914 |
| SOX4 | rs11281983  | 21600430 | R,I | 0.9309 | 0.9934 | -0.316  | 0.797   | 0.1571 | 0.6918 |
| SOX4 | rs16885105  | 21598981 | C,T | 0.9309 | 0.9869 | -0.318  | 0.801   | 0.157  | 0.6919 |
| SOX4 | rs111404042 | 21565201 | G,A | 0.9548 | 0.5207 | 0.335   | 0.845   | 0.1568 | 0.6921 |
| SOX4 | rs113534734 | 21596349 | R,D | 0.9404 | 0.7354 | -0.352  | 0.891   | 0.1561 | 0.6927 |
| SOX4 | rs11433545  | 21672216 | R,I | 0.5947 | 0.6034 | 0.137   | 0.347   | 0.156  | 0.6929 |
| SOX4 | rs78030412  | 21631511 | T,C | 0.9731 | 0.7032 | -0.329  | 0.835   | 0.1558 | 0.6931 |
| SOX4 | rs146269383 | 21601263 | G,A | 0.9772 | 0.8168 | -0.324  | 0.821   | 0.1557 | 0.6932 |
| SOX4 | rs35605844  | 21674022 | D,R | 0.6185 | 0.9309 | -0.104  | 0.264   | 0.1555 | 0.6933 |
| SOX4 | rs77625474  | 21604127 | G,T | 0.9308 | 0.9762 | -0.314  | 0.799   | 0.1548 | 0.694  |
| SOX4 | rs1740854   | 21680732 | A,C | 0.6112 | 0.9639 | -0.102  | 0.259   | 0.1544 | 0.6943 |
| SOX4 | rs9466125   | 21601156 | A,G | 0.9295 | 0.9574 | -0.314  | 0.801   | 0.1537 | 0.695  |
| SOX4 | rs147960757 | 21606492 | G,T | 0.9772 | 0.8203 | -0.32   | 0.821   | 0.152  | 0.6966 |
| SOX4 | rs76428292  | 21629756 | C,A | 0.974  | 0.7112 | -0.325  | 0.837   | 0.1511 | 0.6975 |
| SOX4 | rs78523587  | 21614133 | G,A | 0.9764 | 0.7872 | -0.32   | 0.825   | 0.1508 | 0.6978 |
| SOX4 | rs74329629  | 21583401 | G,A | 0.9656 | 0.5138 | -0.391  | 1.008   | 0.1501 | 0.6984 |
| SOX4 | rs1744885   | 21670816 | A,G | 0.4476 | 0.9803 | 0.1     | 0.258   | 0.1498 | 0.6988 |
| SOX4 | rs1744889   | 21676795 | A,G | 0.6165 | 0.9936 | -0.098  | 0.257   | 0.1465 | 0.7019 |
| SOX4 | rs2749684   | 21676485 | C,T | 0.6168 | 0.9872 | -0.098  | 0.257   | 0.1464 | 0.702  |
| SOX4 | rs79753782  | 21594201 | C,A | 0.9506 | 0.6778 | -0.347  | 0.909   | 0.1455 | 0.7028 |
| SOX4 | rs1740863   | 21670641 | C,T | 0.6246 | 0.9994 | -0.098  | 0.257   | 0.1446 | 0.7037 |
| SOX4 | rs9466145   | 21677060 | A,C | 0.6171 | 1      | -0.098  | 0.257   | 0.1446 | 0.7037 |
| SOX4 | rs60336041  | 21714991 | A,C | 0.9818 | 0.9007 | 61.327  | 161.727 | 0.1438 | 0.7045 |
| SOX4 | rs7740486   | 21714797 | A,G | 0.9818 | 0.8978 | 61.327  | 161.727 | 0.1438 | 0.7045 |
| SOX4 | rs7772335   | 21696185 | C,T | 0.8913 | 0.4593 | -0.336  | 0.889   | 0.1431 | 0.7052 |
| SOX4 | rs78502915  | 21591248 | G,T | 0.9567 | 0.6759 | -0.352  | 0.932   | 0.143  | 0.7054 |
| SOX4 | rs9358442   | 21573637 | G,A | 0.7034 | 0.4581 | 0.162   | 0.43    | 0.1419 | 0.7064 |
| SOX4 | rs912025    | 21716058 | C,G | 0.8371 | 0.9358 | -0.196  | 0.521   | 0.1415 | 0.7068 |
| SOX4 | rs143393812 | 21633911 | C,T | 0.9816 | 0.5752 | -6.302  | 16.947  | 0.1383 | 0.71   |
| SOX4 | rs6906888   | 21697966 | G,A | 0.9391 | 0.5729 | 0.609   | 1.646   | 0.137  | 0.7113 |
| SOX4 | rs111482236 | 21588455 | T,C | 0.9537 | 0.6111 | -0.348  | 0.948   | 0.1347 | 0.7136 |
| SOX4 | rs116443937 | 21600982 | A,T | 0.9889 | 0.6106 | -11.705 | 31.888  | 0.1347 | 0.7136 |

|      |             |          |     |        |        |         |         |        |        |
|------|-------------|----------|-----|--------|--------|---------|---------|--------|--------|
| SOX4 | rs9460655   | 21641564 | C,T | 0.6926 | 0.8571 | 0.111   | 0.303   | 0.1345 | 0.7138 |
| SOX4 | rs112117324 | 21606452 | C,T | 0.9756 | 0.8592 | -8.341  | 22.814  | 0.1337 | 0.7146 |
| SOX4 | rs561618338 | 21639342 | R,I | 0.9855 | 0.4795 | -5.943  | 16.252  | 0.1337 | 0.7146 |
| SOX4 | rs1744882   | 21657561 | T,G | 0.7003 | 0.8473 | 0.105   | 0.289   | 0.1315 | 0.7169 |
| SOX4 | rs77991965  | 21694060 | G,A | 0.9358 | 0.6372 | 0.638   | 1.773   | 0.1294 | 0.7191 |
| SOX4 | rs1740864   | 21668282 | G,A | 0.6096 | 0.9094 | -0.096  | 0.268   | 0.1291 | 0.7194 |
| SOX4 | rs6906248   | 21697889 | A,G | 0.9391 | 0.5714 | 0.595   | 1.664   | 0.1277 | 0.7208 |
| SOX4 | rs80035391  | 21685357 | G,A | 0.8973 | 0.5163 | 0.3     | 0.841   | 0.1269 | 0.7216 |
| SOX4 | rs57761609  | 21683420 | D,R | 0.6127 | 0.8292 | -0.1    | 0.283   | 0.1259 | 0.7228 |
| SOX4 | rs6929045   | 21697861 | T,C | 0.9391 | 0.5712 | 0.591   | 1.666   | 0.1258 | 0.7228 |
| SOX4 | rs111479343 | 21561070 | G,T | 0.9092 | 0.4694 | 0.242   | 0.683   | 0.1257 | 0.7229 |
| SOX4 | rs76144443  | 21697748 | A,G | 0.9391 | 0.5709 | 0.591   | 1.67    | 0.1253 | 0.7233 |
| SOX4 | rs114266456 | 21633347 | G,A | 0.9661 | 0.7099 | -0.322  | 0.913   | 0.1243 | 0.7244 |
| SOX4 | rs6928871   | 21697812 | T,C | 0.9391 | 0.571  | 0.587   | 1.667   | 0.124  | 0.7248 |
| SOX4 | rs113932195 | 21562740 | T,C | 0.9088 | 0.469  | 0.24    | 0.685   | 0.1231 | 0.7257 |
| SOX4 | rs2749688   | 21658487 | G,C | 0.6992 | 0.8356 | 0.101   | 0.289   | 0.122  | 0.7268 |
| SOX4 | rs530522537 | 21694259 | R,D | 0.9305 | 0.6164 | 0.638   | 1.831   | 0.1215 | 0.7274 |
| SOX4 | rs9460650   | 21615371 | T,C | 0.9841 | 0.9776 | -46.326 | 132.882 | 0.1215 | 0.7274 |
| SOX4 | rs118074543 | 21601297 | C,G | 0.9891 | 0.6166 | -11.013 | 31.647  | 0.1211 | 0.7278 |
| SOX4 | rs115252874 | 21601345 | A,C | 0.9891 | 0.6163 | -10.83  | 31.639  | 0.1172 | 0.7321 |
| SOX4 | rs1744848   | 21609563 | C,T | 0.6977 | 0.9669 | 0.104   | 0.305   | 0.1167 | 0.7327 |
| SOX4 | rs7759991   | 21609547 | C,T | 0.6977 | 0.9669 | 0.104   | 0.305   | 0.1158 | 0.7337 |
| SOX4 | rs7772258   | 21686985 | T,C | 0.8466 | 0.7118 | 0.235   | 0.693   | 0.1149 | 0.7347 |
| SOX4 | rs7739775   | 21727465 | C,T | 0.87   | 0.9769 | -0.223  | 0.664   | 0.1132 | 0.7366 |
| SOX4 | rs114613272 | 21721382 | C,T | 0.984  | 0.8169 | 15.498  | 46.324  | 0.1119 | 0.7379 |
| SOX4 | rs77708052  | 21605375 | C,T | 0.98   | 0.7948 | -0.304  | 0.908   | 0.1118 | 0.7381 |
| SOX4 | rs78825652  | 21609539 | I,R | 0.6732 | 0.9671 | 0.102   | 0.305   | 0.1116 | 0.7383 |
| SOX4 | rs78225455  | 21566785 | T,A | 0.9087 | 0.4686 | 0.226   | 0.687   | 0.1077 | 0.7427 |
| SOX4 | rs78686872  | 21566786 | T,C | 0.9087 | 0.4686 | 0.225   | 0.688   | 0.1073 | 0.7432 |
| SOX4 | rs77394991  | 21735578 | C,T | 0.8447 | 0.9263 | -0.176  | 0.541   | 0.1063 | 0.7444 |
| SOX4 | rs58919806  | 21570038 | G,A | 0.8921 | 0.397  | 0.229   | 0.704   | 0.106  | 0.7448 |
| SOX4 | rs941990    | 21658881 | A,G | 0.6778 | 0.8561 | 0.093   | 0.287   | 0.1039 | 0.7471 |
| SOX4 | rs370328808 | 21641504 | D,R | 0.7285 | 0.8536 | 0.095   | 0.296   | 0.1038 | 0.7474 |
| SOX4 | rs529643978 | 21641557 | D,R | 0.7285 | 0.854  | 0.095   | 0.296   | 0.1037 | 0.7474 |
| SOX4 | rs562290828 | 21641555 | D,R | 0.7285 | 0.8538 | 0.095   | 0.296   | 0.1034 | 0.7478 |
| SOX4 | rs113411153 | 21641562 | D,R | 0.7285 | 0.8541 | 0.095   | 0.296   | 0.1033 | 0.7479 |
| SOX4 | rs561593549 | 21641496 | C,T | 0.7285 | 0.8534 | 0.095   | 0.296   | 0.1033 | 0.7479 |
| SOX4 | rs74831068  | 21693978 | T,C | 0.8189 | 0.778  | 0.203   | 0.634   | 0.103  | 0.7483 |
| SOX4 | rs112395953 | 21727909 | A,C | 0.885  | 0.9741 | -0.211  | 0.665   | 0.101  | 0.7507 |
| SOX4 | rs59015153  | 21574306 | T,A | 0.9504 | 0.4712 | -0.332  | 1.071   | 0.096  | 0.7567 |
| SOX4 | rs531584400 | 21574100 | R,D | 0.9506 | 0.471  | -0.331  | 1.073   | 0.0953 | 0.7575 |
| SOX4 | rs79232286  | 21689146 | G,A | 0.8483 | 0.7428 | 0.21    | 0.68    | 0.0953 | 0.7575 |
| SOX4 | rs4712624   | 21693152 | A,G | 0.843  | 0.7383 | 0.209   | 0.678   | 0.0953 | 0.7576 |
| SOX4 | rs116016141 | 21687920 | C,T | 0.988  | 0.5009 | -14.151 | 46.102  | 0.0942 | 0.7589 |
| SOX4 | rs1740837   | 21633917 | C,T | 0.6783 | 0.9174 | 0.089   | 0.29    | 0.0931 | 0.7603 |

|      |             |          |     |        |        |         |         |        |        |
|------|-------------|----------|-----|--------|--------|---------|---------|--------|--------|
| SOX4 | rs571708107 | 21634038 | D,R | 0.6795 | 0.8686 | 0.087   | 0.294   | 0.0883 | 0.7663 |
| SOX4 | rs147795739 | 21606396 | C,G | 0.9894 | 0.6082 | -9.227  | 31.172  | 0.0876 | 0.7672 |
| SOX4 | rs1321253   | 21689813 | T,A | 0.8723 | 0.7273 | 0.204   | 0.691   | 0.0868 | 0.7683 |
| SOX4 | rs1973987   | 21687659 | G,T | 0.8711 | 0.6956 | 0.207   | 0.706   | 0.0859 | 0.7694 |
| SOX4 | rs1740868   | 21660205 | G,T | 0.6798 | 0.8487 | 0.083   | 0.287   | 0.0845 | 0.7712 |
| SOX4 | rs1740833   | 21646435 | A,G | 0.6798 | 0.9621 | 0.082   | 0.281   | 0.0844 | 0.7714 |
| SOX4 | rs10643502  | 21641556 | T,C | 0.688  | 0.853  | 0.088   | 0.303   | 0.0841 | 0.7718 |
| SOX4 | rs12524788  | 21690518 | T,G | 0.8725 | 0.7375 | 0.198   | 0.685   | 0.0838 | 0.7722 |
| SOX4 | rs77992585  | 21687331 | G,A | 0.8724 | 0.6862 | 0.206   | 0.713   | 0.0834 | 0.7727 |
| SOX4 | rs75051132  | 21589799 | T,A | 0.98   | 0.6365 | -0.302  | 1.047   | 0.0831 | 0.7732 |
| SOX4 | rs1622043   | 21609285 | A,G | 0.6925 | 0.9814 | 0.087   | 0.305   | 0.081  | 0.7759 |
| SOX4 | rs11361021  | 21608909 | D,R | 0.6928 | 0.9683 | 0.087   | 0.306   | 0.0801 | 0.7772 |
| SOX4 | rs80309179  | 21644884 | G,T | 0.9894 | 0.4434 | 2.133   | 7.539   | 0.08   | 0.7772 |
| SOX4 | rs79684204  | 21687368 | A,C | 0.9748 | 0.5098 | 1.318   | 4.669   | 0.0796 | 0.7778 |
| SOX4 | rs571788443 | 21558875 | R,D | 0.8581 | 0.3304 | 0.18    | 0.643   | 0.0785 | 0.7793 |
| SOX4 | rs73737557  | 21570448 | T,C | 0.9333 | 0.4619 | -0.233  | 0.831   | 0.0783 | 0.7796 |
| SOX4 | rs75629001  | 21689221 | C,T | 0.8716 | 0.708  | 0.195   | 0.699   | 0.078  | 0.78   |
| SOX4 | rs76257188  | 21688091 | T,G | 0.8712 | 0.7018 | 0.196   | 0.705   | 0.0776 | 0.7806 |
| SOX4 | rs200447839 | 21689115 | R,D | 0.8701 | 0.7188 | 0.192   | 0.69    | 0.0772 | 0.7811 |
| SOX4 | rs1617781   | 21608766 | A,G | 0.693  | 0.9819 | 0.084   | 0.305   | 0.0764 | 0.7822 |
| SOX4 | rs11438117  | 21660100 | R,I | 0.4211 | 0.4868 | -0.096  | 0.35    | 0.0757 | 0.7833 |
| SOX4 | rs148767257 | 21687606 | C,T | 0.9752 | 0.5064 | 1.28    | 4.666   | 0.0752 | 0.7838 |
| SOX4 | rs78278852  | 21688571 | G,A | 0.9753 | 0.5113 | 1.275   | 4.661   | 0.0748 | 0.7845 |
| SOX4 | rs76857610  | 21685543 | G,T | 0.9888 | 0.4734 | 1.456   | 5.328   | 0.0747 | 0.7846 |
| SOX4 | rs115180462 | 21686653 | G,C | 0.9752 | 0.5032 | 1.274   | 4.673   | 0.0743 | 0.7851 |
| SOX4 | rs7747757   | 21686714 | C,T | 0.9752 | 0.5035 | 1.274   | 4.673   | 0.0743 | 0.7851 |
| SOX4 | rs7753451   | 21607833 | T,C | 0.9894 | 0.606  | -8.57   | 31.461  | 0.0742 | 0.7853 |
| SOX4 | rs142460847 | 21687632 | A,G | 0.9751 | 0.5044 | 1.235   | 4.669   | 0.07   | 0.7913 |
| SOX4 | rs7746424   | 21685920 | C,T | 0.9762 | 0.4981 | 1.246   | 4.709   | 0.07   | 0.7914 |
| SOX4 | rs7746432   | 21685933 | C,T | 0.9755 | 0.5041 | 1.246   | 4.709   | 0.07   | 0.7914 |
| SOX4 | rs140066406 | 21728813 | R,I | 0.8701 | 0.9744 | -0.175  | 0.664   | 0.0695 | 0.792  |
| SOX4 | rs7746895   | 21686168 | C,A | 0.9752 | 0.5028 | 1.224   | 4.675   | 0.0685 | 0.7935 |
| SOX4 | rs9295513   | 21599766 | G,A | 0.9746 | 0.8988 | -35.614 | 137.605 | 0.067  | 0.7958 |
| SOX4 | rs114455294 | 21693186 | A,T | 0.9731 | 0.5546 | 0.54    | 2.13    | 0.0642 | 0.7999 |
| SOX4 | rs9466160   | 21722771 | A,G | 0.9736 | 0.8106 | 4.303   | 17.159  | 0.0629 | 0.802  |
| SOX4 | rs7746292   | 21685907 | A,G | 0.9762 | 0.4817 | 1.185   | 4.729   | 0.0628 | 0.8021 |
| SOX4 | rs139581361 | 21722128 | G,A | 0.9879 | 0.8119 | 16.97   | 69.358  | 0.0599 | 0.8067 |
| SOX4 | rs540918539 | 21717464 | R,D | 0.9882 | 0.804  | -106.89 | 438.659 | 0.0594 | 0.8075 |
| SOX4 | rs12528435  | 21562732 | G,A | 0.8866 | 0.355  | -0.199  | 0.816   | 0.0592 | 0.8077 |
| SOX4 | rs5874828   | 21692948 | R,D | 0.8716 | 0.725  | 0.166   | 0.692   | 0.0578 | 0.81   |
| SOX4 | rs79002033  | 21706995 | C,T | 0.9739 | 0.6771 | 2.141   | 9.082   | 0.0555 | 0.8137 |
| SOX4 | rs144306476 | 21721932 | T,G | 0.989  | 0.6617 | 4.869   | 22.49   | 0.0469 | 0.8286 |
| SOX4 | rs78712702  | 21700242 | T,A | 0.9843 | 0.4664 | -0.368  | 1.721   | 0.0458 | 0.8306 |
| SOX4 | rs111684701 | 21608562 | C,T | 0.9809 | 0.9509 | 72.743  | 369.311 | 0.0388 | 0.8439 |
| SOX4 | rs112892524 | 21608321 | C,T | 0.981  | 0.9464 | 72.743  | 369.311 | 0.0388 | 0.8439 |

|      |             |          |     |        |        |        |         |        |        |
|------|-------------|----------|-----|--------|--------|--------|---------|--------|--------|
| SOX4 | rs35829440  | 21655243 | R,I | 0.602  | 0.3134 | -0.091 | 0.477   | 0.0366 | 0.8482 |
| SOX4 | rs16885170  | 21716554 | G,A | 0.8229 | 0.9708 | -0.093 | 0.492   | 0.0357 | 0.8501 |
| SOX4 | rs116258702 | 21618081 | C,T | 0.9891 | 0.5647 | -5.682 | 31.864  | 0.0318 | 0.8585 |
| SOX4 | rs149746556 | 21731479 | R,D | 0.9872 | 0.7098 | 0.22   | 1.307   | 0.0284 | 0.8662 |
| SOX4 | rs78584490  | 21732145 | C,T | 0.9872 | 0.7096 | 0.219  | 1.307   | 0.0281 | 0.8669 |
| SOX4 | rs142355149 | 21692662 | A,C | 0.9804 | 0.36   | 0.869  | 5.793   | 0.0225 | 0.8808 |
| SOX4 | rs75935729  | 21733252 | C,A | 0.9872 | 0.709  | 0.195  | 1.312   | 0.0221 | 0.8818 |
| SOX4 | rs147596047 | 21733524 | R,D | 0.9872 | 0.709  | 0.193  | 1.312   | 0.0217 | 0.8829 |
| SOX4 | rs77258728  | 21734254 | G,A | 0.9872 | 0.709  | 0.184  | 1.314   | 0.0196 | 0.8887 |
| SOX4 | rs115733488 | 21695961 | T,C | 0.9892 | 0.5305 | 0.548  | 4.307   | 0.0162 | 0.8987 |
| SOX4 | rs141765572 | 21679089 | G,T | 0.9877 | 0.5484 | 0.208  | 1.671   | 0.0155 | 0.901  |
| SOX4 | rs148775927 | 21677832 | C,G | 0.9884 | 0.5129 | 0.197  | 1.624   | 0.0148 | 0.9033 |
| SOX4 | rs71563992  | 21655825 | G,T | 0.9888 | 0.8713 | 4.382  | 36.378  | 0.0145 | 0.9041 |
| SOX4 | rs113815998 | 21709365 | G,T | 0.9608 | 0.7324 | 0.156  | 1.296   | 0.0144 | 0.9043 |
| SOX4 | rs149768565 | 21719941 | R,D | 0.9754 | 0.6872 | 2.662  | 24.913  | 0.0114 | 0.9149 |
| SOX4 | rs79853707  | 21699451 | C,T | 0.986  | 0.5502 | 0.217  | 2.033   | 0.0114 | 0.9151 |
| SOX4 | rs111374956 | 21699545 | G,C | 0.9871 | 0.5681 | 0.211  | 2.022   | 0.0109 | 0.917  |
| SOX4 | rs113183700 | 21702524 | A,G | 0.9869 | 0.5842 | 0.18   | 1.739   | 0.0107 | 0.9177 |
| SOX4 | rs111928162 | 21706372 | T,C | 0.9868 | 0.6035 | 0.156  | 1.536   | 0.0103 | 0.9193 |
| SOX4 | rs116300465 | 21738509 | T,G | 0.8638 | 0.9326 | -0.056 | 0.564   | 0.0097 | 0.9214 |
| SOX4 | rs182063949 | 21738643 | T,A | 0.9864 | 0.6453 | 0.124  | 1.344   | 0.0086 | 0.9262 |
| SOX4 | rs9466128   | 21606679 | G,T | 0.3766 | 0.995  | -0.027 | 0.293   | 0.0085 | 0.9266 |
| SOX4 | rs78937245  | 21738761 | C,T | 0.9864 | 0.6447 | 0.122  | 1.344   | 0.0083 | 0.9274 |
| SOX4 | rs6900676   | 21697176 | A,G | 0.9471 | 0.5384 | 0.183  | 2.045   | 0.008  | 0.9286 |
| SOX4 | rs6900485   | 21697055 | A,T | 0.9471 | 0.5382 | 0.178  | 2.048   | 0.0076 | 0.9306 |
| SOX4 | rs1744866   | 21631188 | C,T | 0.9885 | 0.3807 | -0.484 | 5.711   | 0.0072 | 0.9324 |
| SOX4 | rs139419250 | 21696871 | R,I | 0.9475 | 0.5307 | 0.172  | 2.054   | 0.007  | 0.9332 |
| SOX4 | rs7753199   | 21717706 | G,A | 0.9819 | 0.9391 | 46.218 | 553.967 | 0.007  | 0.9335 |
| SOX4 | rs7757232   | 21717818 | G,A | 0.9819 | 0.9404 | 46.218 | 553.967 | 0.007  | 0.9335 |
| SOX4 | rs7757467   | 21718123 | C,T | 0.9813 | 0.9676 | 92.436 | 1107.93 | 0.007  | 0.9335 |
| SOX4 | rs74323084  | 21645152 | C,G | 0.9857 | 0.7691 | 0.09   | 1.189   | 0.0057 | 0.9396 |
| SOX4 | rs9466143   | 21676688 | A,T | 0.943  | 0.8542 | -6.405 | 86.154  | 0.0055 | 0.9407 |
| SOX4 | rs145778004 | 21696926 | R,I | 0.9468 | 0.5319 | 0.151  | 2.056   | 0.0054 | 0.9415 |
| SOX4 | rs116779637 | 21718919 | G,T | 0.9886 | 0.7935 | -8.934 | 138.492 | 0.0042 | 0.9486 |
| SOX4 | rs149385127 | 21642947 | G,A | 0.9849 | 0.723  | 0.077  | 1.189   | 0.0042 | 0.9486 |
| SOX4 | rs6925407   | 21724100 | G,C | 0.9884 | 0.9399 | -0.518 | 8.029   | 0.0042 | 0.9486 |
| SOX4 | rs78378200  | 21647275 | T,C | 0.985  | 0.7319 | 0.075  | 1.192   | 0.0039 | 0.9499 |
| SOX4 | rs549313068 | 21638634 | R,D | 0.9854 | 0.7268 | 0.072  | 1.191   | 0.0037 | 0.9515 |
| SOX4 | rs141253251 | 21567552 | G,A | 0.9772 | 0.4147 | -0.089 | 1.523   | 0.0034 | 0.9534 |
| SOX4 | rs141898580 | 21709985 | C,T | 0.9816 | 0.8379 | -2.697 | 48.844  | 0.003  | 0.956  |
| SOX4 | rs114981716 | 21562453 | G,A | 0.977  | 0.3896 | -0.085 | 1.565   | 0.0029 | 0.9568 |
| SOX4 | rs79883278  | 21720741 | C,T | 0.9819 | 0.8353 | 2.561  | 48.166  | 0.0028 | 0.9576 |
| SOX4 | rs4710982   | 21733835 | G,C | 0.8653 | 0.9343 | 0.031  | 0.588   | 0.0028 | 0.9581 |
| SOX4 | rs9460670   | 21731138 | C,A | 0.877  | 0.9736 | 0.03   | 0.588   | 0.0026 | 0.9593 |
| SOX4 | rs1744856   | 21625895 | G,A | 0.6341 | 0.4717 | -0.02  | 0.41    | 0.0023 | 0.9615 |

|      |             |          |     |        |        |         |         |        |        |
|------|-------------|----------|-----|--------|--------|---------|---------|--------|--------|
| SOX4 | rs12528487  | 21735354 | A,G | 0.8629 | 0.9338 | 0.028   | 0.592   | 0.0022 | 0.9626 |
| SOX4 | rs113064891 | 21606092 | R,I | 0.9811 | 0.9369 | 8.363   | 178.6   | 0.0022 | 0.9627 |
| SOX4 | rs115900264 | 21738499 | A,G | 0.8705 | 0.965  | 0.027   | 0.589   | 0.0021 | 0.9631 |
| SOX4 | rs561391795 | 21725044 | R,D | 0.9346 | 0.4431 | 0.066   | 1.503   | 0.0019 | 0.9651 |
| SOX4 | rs6933476   | 21720156 | G,A | 0.9819 | 0.8936 | 3.22    | 78.744  | 0.0017 | 0.9674 |
| SOX4 | rs56175726  | 21566498 | G,A | 0.9534 | 0.3503 | 0.059   | 1.526   | 0.0015 | 0.969  |
| SOX4 | rs12525631  | 21730840 | C,T | 0.8794 | 0.9968 | 0.023   | 0.585   | 0.0015 | 0.9692 |
| SOX4 | rs16885189  | 21729682 | G,A | 0.8667 | 0.9973 | 0.023   | 0.585   | 0.0015 | 0.9692 |
| SOX4 | rs4712633   | 21738249 | A,G | 0.8598 | 1      | 0.023   | 0.585   | 0.0015 | 0.9692 |
| SOX4 | rs61157774  | 21556217 | C,T | 0.9598 | 0.3134 | -0.05   | 1.785   | 0.0008 | 0.9776 |
| SOX4 | rs59880840  | 21556245 | G,A | 0.9598 | 0.3138 | -0.045  | 1.785   | 0.0006 | 0.9798 |
| SOX4 | rs150555050 | 21561633 | G,A | 0.9894 | 0.5125 | -3.624  | 144.537 | 0.0006 | 0.98   |
| SOX4 | rs7739666   | 21718260 | T,C | 0.9818 | 0.939  | -10.388 | 502.462 | 0.0004 | 0.9835 |
| SOX4 | rs78265086  | 21720541 | T,C | 0.9826 | 0.8636 | 1.146   | 65.219  | 0.0003 | 0.986  |
| SOX4 | rs60459153  | 21570941 | G,A | 0.9572 | 0.4198 | 0.026   | 1.478   | 0.0003 | 0.9862 |
| SOX4 | rs545611803 | 21688770 | R,I | 0.8158 | 0.533  | -0.009  | 0.615   | 0.0002 | 0.9878 |
| SOX4 | rs75179770  | 21568397 | C,T | 0.9582 | 0.4017 | 0.015   | 1.514   | 0.0001 | 0.9919 |
| SOX4 | rs61215435  | 21721256 | C,T | 0.9893 | 0.7083 | -0.4    | 41.055  | 0.0001 | 0.9922 |
| SOX4 | rs61197304  | 21570213 | G,A | 0.9581 | 0.4232 | 0.002   | 1.484   | 0      | 0.9989 |
| SOX4 | rs117396734 | 21615374 | A,T | 0.9894 | 0.5869 | 0.007   | 30.415  | 0      | 0.9998 |
| SOX4 | rs7739235   | 21609345 | A,T | 0.9799 | 0.962  | 0       | 1E+15   | 0      | 1      |
| SOX4 | rs7740142   | 21609635 | G,A | 0.9809 | 0.955  | 0       | 1E+15   | 0      | 1      |
| SOX4 | rs9460649   | 21614884 | G,A | 0.9843 | 0.994  | 0       | 1E+15   | 0      | 1      |

**Legend:**

TRAIT: eQTL for which we are testing the marker's association with.

MARKER: SNP being tested.

BP: Base position of marker within chromosome 6.

ALLELES: Allele 1, Allele 2

FREQ1: Frequency of Allele 1

RSQR: Squared correlation between imputed and true genotypes.

EFFECT2: Beta estimate using Allele 2 as the risk allele.

STDERR: Standard error of beta estimate.

CHISQ: Chi-square statistic of association test.

PVALUE: P-value of association test.

**Supplementary Table 3: Studies of 6p22.3 Genes and Cancer using SNP or Expression Data**

| Gene   | Study                                                        | Study Type | Brief Description                                                                                                                                                        | # of Cases | Top SNP (Risk Allele) | Effect                                         | P                    | R2 to our top SNP | Significant | PMID     |
|--------|--------------------------------------------------------------|------------|--------------------------------------------------------------------------------------------------------------------------------------------------------------------------|------------|-----------------------|------------------------------------------------|----------------------|-------------------|-------------|----------|
| CASC15 | Maris et al. <u>N Engl J Med.</u> 2008                       | SNP        | GWAS of clinically aggressive neuroblastoma.                                                                                                                             | 1251       | rs6939340 (G)         | OR: 1.40 (1.26-1.56)                           | 7.01E-10             | 0.002             | Y           | 18463370 |
|        | Diskin et al. <u>Nat Genet.</u> 2012                         | SNP        | GWAS of neuroblastoma.                                                                                                                                                   | 2101       | rs9295536 (A)         | OR: 1.357                                      | 7.80E-16             | 0.003             | Y           | 22941191 |
|        | Latorre et al. <u>Cancer Epidemiol Biomarkers Prev.</u> 2012 | SNP        | GWAS of neuroblastoma in African Americans.                                                                                                                              | 390        | rs9295536 (C)         | OR: 0.90 (0.73-1.10)                           | 0.3                  | 0.003             | N           | 22328350 |
|        | He et al. <u>Tumour Biol.</u> 2015                           | SNP        | Hospital-based case control study (Taqman assay) of neuroblastoma in Han Chinese.                                                                                        | 201        | rs6939340 (A)         | OR: 0.53 (0.38-0.74)                           | AG: 0.006, AA: 0.030 | 0.002             | Y           | 26307394 |
|        | Lessard et al. <u>J Invest Dermatol.</u> 2015                | Expression | Tissue microarray with FFPE melanoma LN metastasis specimens: high CASC15 expression is associated with lower 10-year disease free survival                              | 141        | N/A                   | NR                                             | 0.002                | N/A               | Y           | 26016895 |
| CDKAL1 | Kuruma et al. <u>World J Gastroenterol.</u> 2014             | SNP        | Case-control study (SNPtype assay) of pancreatic cancer in Japanese.                                                                                                     | 360        | rs2206734 (A)         | RR- AG: 1.18 (0.85-1.64), AA: 1.21 (0.78-1.89) | NR                   | 0                 | N           | 25516658 |
|        | Ma et al. <u>Diabetes Res Clin Pract.</u> 2014               | SNP        | Case-control study (Sequenom MassARRAY) of cancer incidence in Han Chinese with T2D                                                                                      | 429        | rs7756992 (G)         | HR: 0.80 (0.65-1.00)                           | 0.048                | 0                 | Y           | 24468095 |
|        | Sainz et al. <u>J Clin Endocrinol Metab.</u> 2012            | SNP        | Case-control study (KASPar assay) of colorectal cancer risk                                                                                                              | 1782       | rs7754840 (C)         | OR: 0.94 (0.85-1.04)                           | 0.03 in males        | 0                 | Y           | 22419714 |
|        | Meyer et al. <u>Cancer Epidemiol Biomarkers Prev.</u> 2010   | SNP        | Case-control study (TaqMan assay) of prostate cancer incidence.                                                                                                          | 397        | rs7754840 (C)         | HR: 1.01 (0.87, 1.18)                          | NR                   | 0                 | N           | 20142250 |
|        | Figueroa et al. <u>Hum Mol Genet.</u> 2014                   | SNP        | GWAS of bladder cancer                                                                                                                                                   | 7697       | rs4510656 (C)         | OR 0.89                                        | 6.98E-07             | 0                 | Not GWS     | 24163127 |
| SOX4*  | Chen et al. <u>Clin Transl Oncol.</u> 2015                   | Expression | Meta-analysis of 10 studies with >1000 cancer patients: SOX4 overexpression correlated with poor overall survival                                                        | 1348       | N/A                   | HR: 1.67 (1.01-2.78)                           | NR                   | N/A               | Y           | 26250764 |
|        | Song et al. <u>Tumour Biol.</u> 2015                         | Expression | mRNA and protein expression of SOX4 in breast cancer and adjacent normal: overexpression is an unfavorable prognostic factor regardless of stage, tumor size, metastasis | 148        | N/A                   | HR: 1.67 (1.04-2.66)                           | OS: 0.033            | N/A               | Y           | 25592378 |
|        | Walter et al. <u>Future Oncol.</u> 2015                      | Expression | mRNA expression of SOX4 in neuroendocrine tumors of the lung.                                                                                                            | 60         | N/A                   | N/A                                            | OS: 0.0002           | N/A               | Y           | 25804118 |
|        | Lu et al. <u>Tumour Biol.</u> 2015                           | Expression | SOX4 overexpression associated with poor prognosis as measured by tumour recurrence in chondrosarcoma patients.                                                          | 92         | N/A                   | HR: 3.67 (0.28-48.37)                          | RFS: 0.035           | N/A               | Y           | 25572678 |
|        | Wang et al. <u>Mol Cell Biochem.</u> 2015                    | Expression | SOX4 mRNA and protein expression were markedly higher in NSCLC tissues than in normal lung tissues.                                                                      | 168        | N/A                   | HR: 3.21 (2.06-5.02)                           | OS: <0.001           | N/A               | Y           | 25567207 |
|        | Zhou et al. <u>J Cell Biochem.</u> 2015                      | Expression | High expression levels of SOX4 mRNA were correlated with worse overall survival in Xuanwei females with lung cancer.                                                     | 96         | N/A                   | NR                                             | OS: < 0.001          | N/A               | Y           | 25565486 |
|        | Huang et al. 2009 <u>Cancer Res.</u> 2009                    | Expression | SOX4 overexpressed in endometrial tumors compared with normal tissue from controls without endometrial cancer.                                                           | 74         | N/A                   | N/A                                            | P < 0.005            | N/A               | Y           | 19887623 |

\* Over 150 articles on SOX4 expression and cancer have been published since 1995. Articles published in 2015 and those related specifically to endometrial cancer are presented here.

NR: Not Reported, OS: Overall Survival, RFS: Recurrence Free Survival

#### Supplementary Table 4. Description of studies included in meta-analysis.

| Cohort | Cases | Controls | Subtype      | Age Criteria | Platform                                        |
|--------|-------|----------|--------------|--------------|-------------------------------------------------|
| ANECs  | 606   | 3083     | Endometrioid | 18-79        | Illumina Infinium 610K                          |
| SEARCH | 681   | 5190     | Endometrioid | 18-69        | Illumina Infinium 610K, Illumina Infinium 1.2M  |
| NSECG  | 925   | 895      | All          | ≤70          | Illumina 660K, Illumina Hap550                  |
| E2C2   | 2695  | 2777     | All          | >18          | Illumina Human OmniExpress, Illumina Human 660W |
| Total  | 4907  | 11945    |              |              |                                                 |
